# Supplementary material for: Enantioselective synthesis of γ-tetrasubstituted nitrosulfonyl carboxylates and amides vial-tert-leucine-derived-squaramide catalyzed conjugate addition of nitrosulfones to acrylates and acrylamides
Source: Royal Society of Chemistry journal article supplement (doi:10.1039/c4ob00344f), 2014-01-01
Supplement: c4ob00344f1.pdf [file c4ob00344f1.pdf]

Experimental Procedures and Characterization Data  
for

**Enantioselective Synthesis of  $\gamma$ -Tetrasubstituted  $\gamma$ -Nitro- $\gamma$ -sulfonyl Carboxylates and Amides via  
*L*-*tert*-Leucine-Derived-Squaramide Catalyzed Conjugate Addition of  $\alpha$ -Nitrosulfones to  
Acrylates and Acrylamides**

Kalisankar Bera and Irishi N. N. Namboothiri\*

Department of Chemistry, Indian Institute of Technology, Bombay, Mumbai 400 076, India,  
irishi@iitb.ac.in

| entry |                                                                                                                                  | page |
|-------|----------------------------------------------------------------------------------------------------------------------------------|------|
| 1     | Table S1. Crystal data and structure refinement for <b>4c</b>                                                                    | 1    |
| 2     | General Experimental Details                                                                                                     | 2    |
| 3     | Procedure for the synthesis of catalysts <b>C10-12</b>                                                                           | 2    |
| 4     | General procedure for the addition of nitrosulfones <b>2</b> to acrylates <b>1</b> and other electron deficient alkenes <b>5</b> | 3    |
| 5     | Synthetic applications of nitrosulfone <b>4b</b>                                                                                 | 11   |
| 6     | References                                                                                                                       | 11   |

**Table S1.** Crystal data and structure refinement for **4c** (CCDC 971336)

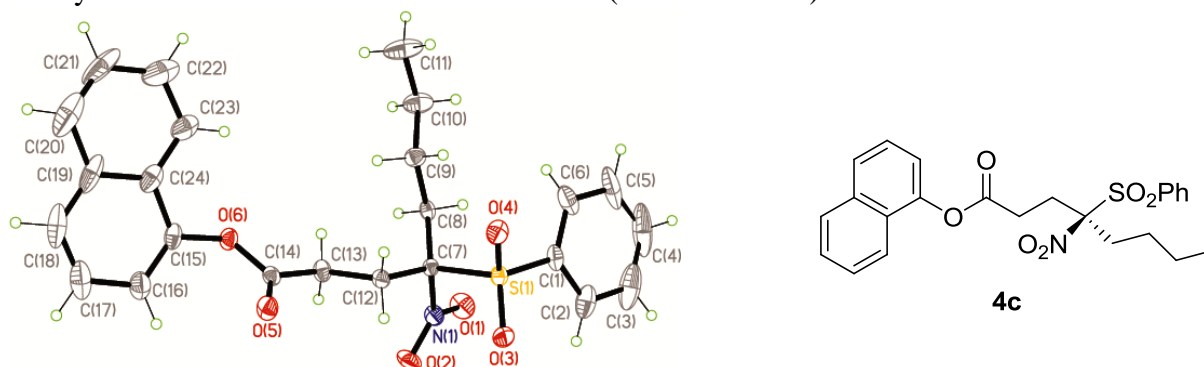

|                                 |                                                    |                       |
|---------------------------------|----------------------------------------------------|-----------------------|
| Identification code             | inn-4-ksb-ns-ac                                    |                       |
| Empirical formula               | C <sub>24</sub> H <sub>25</sub> N O <sub>6</sub> S |                       |
| Formula weight                  | 455.51                                             |                       |
| Temperature                     | 100(2) K                                           |                       |
| Wavelength                      | 0.71073 Å                                          |                       |
| Crystal system                  | Orthorhombic                                       |                       |
| Space group                     | P2(1)2(1)2(1)                                      |                       |
| Unit cell dimensions            | a = 10.600(4) Å                                    | $\alpha = 90^\circ$ . |
|                                 | b = 12.434(5) Å                                    | $\beta = 90^\circ$ .  |
|                                 | c = 16.898(6) Å                                    | $\gamma = 90^\circ$ . |
| Volume                          | 2227.2(15) Å <sup>3</sup>                          |                       |
| Z                               | 4                                                  |                       |
| Density (calculated)            | 1.358 Mg/m <sup>3</sup>                            |                       |
| Absorption coefficient          | 0.186 mm <sup>-1</sup>                             |                       |
| F(000)                          | 960                                                |                       |
| Crystal size                    | 0.48 x 0.34 x 0.27 mm <sup>3</sup>                 |                       |
| Theta range for data collection | 3.84 to 25.36°.                                    |                       |
| Index ranges                    | -10 <= h <= 12, -14 <= k <= 10, -20 <= l <= 20     |                       |
| Reflections collected           | 17141                                              |                       |

|                                   |                                             |
|-----------------------------------|---------------------------------------------|
| Independent reflections           | 4049 [R(int) = 0.0559]                      |
| Completeness to theta = 25.36°    | 99.2 %                                      |
| Absorption correction             | Numerical                                   |
| Max. and min. transmission        | 0.9510 and 0.9160                           |
| Refinement method                 | Full-matrix least-squares on F <sup>2</sup> |
| Data / restraints / parameters    | 4049 / 0 / 290                              |
| Goodness-of-fit on F <sup>2</sup> | 1.032                                       |
| Final R indices [I > 2σ(I)]       | R1 = 0.0381, wR2 = 0.0867                   |
| R indices (all data)              | R1 = 0.0419, wR2 = 0.0885                   |
| Absolute structure parameter      | 0.01(7)                                     |
| Largest diff. peak and hole       | 0.260 and -0.244 e.Å <sup>-3</sup>          |

## Experimental

**General Experimental Details.** The melting points recorded are uncorrected. NMR spectra (<sup>1</sup>H and <sup>1</sup>H decoupled <sup>13</sup>C) were recorded with TMS as the internal standard. The coupling constants (*J* values) are given in Hz. High resolution mass spectra were recorded under ESI Q-TOF conditions. Enantioselectivities were determined using a chiral HPLC equipped with a PDA-detector. Specific rotations were measured for solutions of samples of known concentrations in CHCl<sub>3</sub> using a polarimeter equipped with a sodium vapor lamp. X-ray data were collected on a diffractometer equipped with Mo Kα radiation. The structure was solved by direct methods shelxs97 and refined by full-matrix least squares against F<sup>2</sup> using shelxl97 software. Catalysts **C1-C9**,<sup>1-2</sup> Nitrosulfones **2a-g**,<sup>3</sup> acrylates **1a-n**,<sup>4</sup> acrylamide **5c-e**<sup>5</sup> and enone **5a**<sup>6</sup> were prepared following the procedures reported in the literature. Other electron deficient alkenes such as **5b**, **5f-h** and **1o-p** are commercially available.

**General procedure for the synthesis of catalysts C10-12.** To a solution of 3-methoxy-4-(arylamino)cyclobut-3-ene-1,2-dione (678 mg, 2.00 mmol) in dry DCM (10 ml) was slowly added a solution of diamine<sup>2</sup> (2.00 mmol) in dry DCM (10 ml) at rt. The reaction mixture was stirred for 4 h and the resulting precipitate was isolated by filtration. The residue was washed with ether (10 ml) and dried in vacuo to afford catalyst **C** as a white solid.

**(S)-3-(3,5-Bis(trifluoromethyl)phenylamino)-4-(3,3-dimethyl-1-(piperidin-1-yl)butan-2-ylamino)cyclobut-3-ene-1,2-dione (C10).** Colorless solid; Yield 736 mg, 75%; mp 257-259 °C;  $\nu_{\max}$ (film)/cm<sup>-1</sup> 3205m, 3149m, 2942m, 1796m, 1662m, 1576vs, 1464s, 1376vs, 1275vs, 1196m, 1174m, 1127vs, 940w, 882w, 749w, 683w;  $\delta_{\text{H}}$ (400 MHz; DMSO-d<sub>6</sub>) 0.84 (9H, s), 1.15-1.42 (6H, m), 2.06-2.20 (2H, m), 2.25 (1H, t, *J* 11.8 Hz), 2.32-2.50 (3H, m), 3.92 (1H, t, *J* 8.6 Hz), 7.50-7.58 (2H, br unresolved), 7.99 (2H, s), 9.99 (1H, br s);  $\delta_{\text{C}}$ (100 MHz; DMSO-d<sub>6</sub>) 23.9, 25.7, 26.1, 33.8, 54.2, 58.9, 60.5, 114.6, 117.9, 123.2 (q, *J*<sub>C-F</sub> 271.0 Hz), 131.4 (q, *J*<sub>C-F</sub> 33.0 Hz), 141.2, 161.6, 170.7, 180.1, 184.6; HRMS (ES<sup>+</sup>, Ar) calcd for C<sub>23</sub>H<sub>27</sub>F<sub>6</sub>N<sub>3</sub>O<sub>2</sub>Na (MNa<sup>+</sup>, 100), 514.1900, found 514.1890;  $[\alpha]_{\text{D}}^{26} +49.47$  (c 0.5 in DMSO).

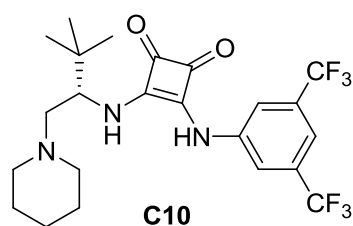

**(S)-3-(3,5-bis(trifluoromethyl)phenylamino)-4-(3-methyl-1-(piperidin-1-yl)butan-2-ylamino)cyclobut-3-ene-1,2-dione (C11).** Colorless solid; Yield 801 mg, 84%; mp 219-220 °C;  $\nu_{\max}$ (film)/cm<sup>-1</sup> 3210s, 3156s, 2941s, 2857w, 2784w, 1800s, 1671s, 1579vs, 1458vs, 1381vs, 1277vs, 1336w, 1277vs, 1214w, 1181s, 1123vs,

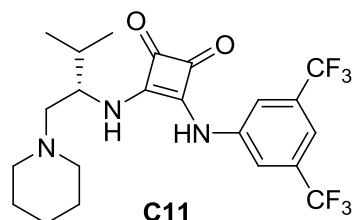

999w, 942m, 885w, 752m;  $\delta_{\text{H}}$ (400 MHz; DMSO- $d_6$ ) 0.88 (3H, d,  $J$  6.8 Hz), 0.89 (3H, d,  $J$  6.8 Hz), 1.24-1.46 (6H, m), 1.77-1.90 (1H, septet,  $J$  6.8 Hz), 2.16-2.28 (2H, m), 2.29-2.39 (m, 3H), 2.39-2.47 (m, 1H), 4.05-4.17 (br unresolved, 1H), 7.51-7.59 (1H, br s), 7.61 (1H, s), 8.04 (2H, s), 9.78-10.40 (1H, br s);  $\delta_{\text{C}}$ (100 MHz; DMSO- $d_6$ ) 16.9, 19.4, 24.0, 25.8, 30.6, 54.4, 57.2, 61.2, 114.7, 118.1, 123.3 (q,  $J_{\text{C-F}}$  271.0 Hz), 131.5 (q,  $J_{\text{C-F}}$  33.0 Hz), 141.3, 162.0, 170.6, 180.4, 184.7; HRMS (ES $^+$ , Ar) calcd for C<sub>22</sub>H<sub>26</sub>F<sub>6</sub>N<sub>3</sub>O<sub>2</sub> (MH $^+$ , 100) 478.1924, found 478.1923;  $[\alpha]_{\text{D}}^{26}$  +14.22 (c 0.5 in Acetone).

**(S)-3-(3,5-bis(trifluoromethyl)phenylamino)-4-(4-methyl-1-(piperidin-1-yl)pentan-2-ylamino)cyclobut-3-ene-1,2-dione (C12).** Colorless solid;

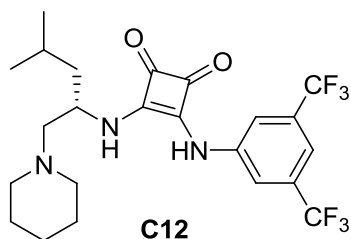

Yield 786 mg, 80%; mp 205-207 °C;  $\nu_{\text{max}}$ (film)/cm $^{-1}$  3204m, 3151m, 3082w, 2938s, 2799w, 1797s, 1665s, 1586vs, 1456vs, 1377vs, 1330w, 1275vs, 1230w, 1194s, 1173m, 1128s, 999w, 941m, 883m, 862w, 744m, 728m, 700m;  $\delta_{\text{H}}$ (400 MHz; DMSO- $d_6$ ) 0.85 (3H, d,  $J$  6.6 Hz), 0.88 (3H, d,  $J$  6.6 Hz), 1.25-1.50 (8H, m), 1.66 (1H, m), 2.15-2.36 (4H, m), 2.36-2.47 (2H, m), 4.21-4.34 (1H, br m), 7.55 (1H, br s), 7.60 (1H, s), 8.00 (2H, s), 10.10 (1H, br s);  $\delta_{\text{C}}$ (100 MHz; DMSO- $d_6$ ) 21.2, 23.2, 23.9, 24.3, 25.7, 42.1, 50.8, 54.4, 64.2, 114.5, 118.0, 123.2 (q,  $J_{\text{C-F}}$  271.0 Hz), 131.4 (q,  $J_{\text{C-F}}$  33.0 Hz), 141.2, 161.8, 170.1, 180.2, 184.7; HRMS (ES $^+$ , Ar) calcd for C<sub>23</sub>H<sub>28</sub>F<sub>6</sub>N<sub>3</sub>O<sub>2</sub> (MH $^+$ ) 492.2080, found 492.2088;  $[\alpha]_{\text{D}}^{26}$  -30.59 (c 0.5 in Acetone).

**General procedure for the addition of nitrosulfone 2 to acrylate 1 and other electron deficient alkenes 5.** To a solution of nitrosulfone 2 (0.4 mmol) and catalyst C10 (0.02 mmol, 9.9 mg) in mesitylene (0.8 ml) was added acrylate 1 (0.6 mmol) at rt. The reaction mixture was stirred at rt and monitored by TLC. The residue was purified by silica gel column chromatography using pet ether-EtOAc (18-40%) as eluent.

**(R)-*p*-Tolyl 4-nitro-4-(phenylsulfonyl)pentanoate (3a).**<sup>7</sup> Colorless solid; Yield 148 mg, 98%; mp 98-99 °C (lit<sup>7</sup> 98-99 °C);  $\nu_{\text{max}}$ (film)/cm $^{-1}$  3065m, 3034m,

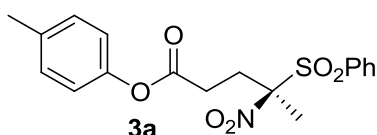

2925s, 2874m, 1756vs, 1551s, 1508m, 1448s, 1384m, 1315vs, 1192vs, 1172vs, 1105w, 916m, 846s, 756s, 730s, 607m;  $\delta_{\text{H}}$ (400 MHz; CDCl<sub>3</sub>) 2.00 (3H, s), 2.34 (s, 3H), 2.52-2.63 (m, 1H), 2.72 (2H, dt,  $J$  13.0, 5.0 Hz), 2.82-2.93 (1H, m), 6.93 (2H, d,  $J$  8.3 Hz), 7.17 (2H, d,  $J$  8.3 Hz), 7.61 (2H, t,  $J$  7.8 Hz), 7.77 (1H, t,  $J$  7.8 Hz), 7.88 (2H, d,  $J$  7.8 Hz);  $\delta_{\text{C}}$ (100 MHz; CDCl<sub>3</sub>) 17.3, 21.0, 28.8, 28.9, 106.0, 121.1, 129.4, 130.1, 131.2, 132.5, 135.7, 136.0, 148.2, 170.0; MS (ES $^+$ , Ar)  $m/z$  (rel intensity) 401 ([MNa+1] $^+$ , 23), 400 (MNa $^+$ , 100), 397 (28), 395 (22), 378 (23), 270 (31); HRMS (ES $^+$ , Ar) calcd for C<sub>18</sub>H<sub>19</sub>NO<sub>6</sub>SNa (MNa $^+$ ) 400.0831, found 400.0817;  $[\alpha]_{\text{D}}^{25}$  +31.43 (c 1.0 in CHCl<sub>3</sub>); HPLC: Chiralcel OD-H (pet ether/*i*-PrOH = 95/5, flow rate 0.5 mL/min,  $\lambda$  = 258 nm),  $t_{\text{R}}$  (major) = 85.4 min,  $t_{\text{R}}$  (minor) = 81.9 min; 92% ee. The experimental data are consistent with those reported in the literature (3a was earlier prepared by addition of nitrosulfone to vinyl ketone followed by *m*-CPBA oxidation).<sup>7</sup>

**(R)-3,5-Dimethylphenyl 4-nitro-4-(phenylsulfonyl)pentanoate (3b).** Colorless sticky oil;

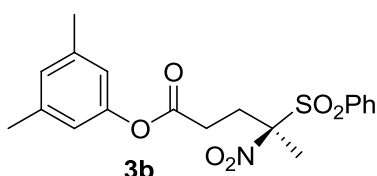

Yield 152 mg, 97%;  $\nu_{\text{max}}$ (neat)/cm $^{-1}$  3065w, 2923w, 2870w, 1757s, 1618w, 1589w, 1555s, 1449w, 1385w, 1335m, 1314w, 1288w, 1157vs, 1076w, 848w, 759w, 688w, 603w;  $\delta_{\text{H}}$ (400 MHz; CDCl<sub>3</sub>) 2.00 (3H, s), 2.31 (6H, s), 2.57 (1H, ddd,  $J$  13.3, 10.2, 5.4 Hz), 2.67-2.77 (2H, m), 2.88 (1H,

ddd,  $J$  13.0, 9.1, 5.4 Hz), 6.68 (2H, s), 6.87 (1H, s), 7.61 (2H, t,  $J$  7.9 Hz), 7.76 (1H, tt,  $J$  7.9, 1.1 Hz), 7.89 (2H, dd,  $J$  7.9, 1.1 Hz);  $\delta_C$ (100 MHz; CDCl<sub>3</sub>) 17.3, 21.3, 28.7, 28.8, 106.0, 118.9, 127.9, 129.4, 131.1, 132.4, 135.6, 139.5, 150.3, 170.0; HRMS (ES<sup>+</sup>, Ar) calcd for C<sub>19</sub>H<sub>21</sub>NO<sub>6</sub>SNa (MNa<sup>+</sup>) 414.0982, found 414.0985;  $[\alpha]_D^{25}$  +28.81 (c 1.0, CHCl<sub>3</sub>); HPLC: Chiralcel OD-H (pet ether/*i*-PrOH = 95/5, flow rate 0.5 mL/min,  $\lambda$  = 258 nm),  $t_R$  (major) = 83.1 min,  $t_R$  (minor) = 71.7 min; 91% ee.

**(R)-4-Methoxyphenyl 4-nitro-4-(phenylsulfonyl)pentanoate (3c).** Colorless solid; Yield 148

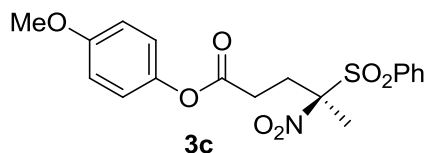

mg, 94%; mp 73-75 °C;  $\nu_{\max}$ (film)/cm<sup>-1</sup> 2931w, 2841w, 1747vs, 1553m, 1507m, 1453w, 1440w, 1385w, 1328m, 1315m, 1298m, 1255w, 1199s, 1169s, 1153s, 1103w, 1073w, 1029w, 845m, 525m;  $\delta_H$ (400 MHz; CDCl<sub>3</sub>) 1.98 (3H, s), 2.56

(1H, ddd,  $J$  12.9, 9.6, 5.9 Hz), 2.66-2.76 (2H, m), 2.87 (1H, ddd,  $J$  13.7, 9.5, 5.9 Hz), 3.77 (3H, s), 6.87, 6.97 (4H, ABq,  $J$  9.0 Hz), 7.60 (2H, t,  $J$  7.6 Hz), 7.76 (1H, t,  $J$  7.6 Hz), 7.88 (2H, d,  $J$  7.6 Hz);  $\delta_C$ (100 MHz; CDCl<sub>3</sub>) 17.3, 28.7, 28.8, 55.7, 106.0, 114.6, 122.2, 129.4, 131.1, 132.5, 135.6, 143.9, 157.5, 170.1; HRMS (ES<sup>+</sup>, Ar) calcd for C<sub>18</sub>H<sub>19</sub>NO<sub>7</sub>SNa (MNa<sup>+</sup>) 416.0774, found 416.0774;  $[\alpha]_D^{25}$  +34.42 (c 1.0 in CHCl<sub>3</sub>); HPLC: Chiralpak IA (pet ether/*i*-PrOH = 95/5, flow rate 1.0 mL/min,  $\lambda$  = 250 nm),  $t_R$  (major) = 98.5 min,  $t_R$  (minor) = 102.0 min; 91% ee.

**(R)-Benzo[d][1,3]dioxol-5-yl 4-nitro-4-(phenylsulfonyl)pentanoate (3d).** Colorless solid;

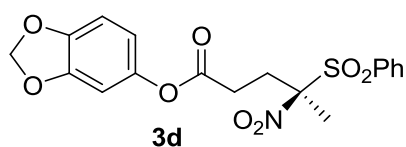

Yield 160 mg, 99%; mp 117-118 °C;  $\nu_{\max}$ (film)/cm<sup>-1</sup> 3068w, 2989w, 2900m, 1758s, 1582w, 1554s, 1502m, 1484s, 1448m, 1386w, 1333s, 1315m, 1248m, 1159vs, 1075w, 1037m, 930m, 848w, 758m, 721w, 689w, 605w;  $\delta_H$  (400 MHz; CDCl<sub>3</sub>) 1.97

(3H, s), 2.55 (1H, ddd,  $J$  13.2, 8.7, 4.5 Hz), 2.65-2.75 (2H, m), 2.85 (1H, ddd,  $J$  14.5, 8.7, 5.0 Hz), 5.95 (2H, s), 6.48 (1H, dd,  $J$  8.4, 2.3 Hz), 6.56 (1H, d,  $J$  2.3 Hz), 6.74 (1H, d,  $J$  8.4 Hz), 7.60 (2H, t,  $J$  7.6 Hz), 7.76 (1H, t,  $J$  7.6 Hz), 7.87 (2H, d,  $J$  7.6 Hz);  $\delta_C$ (100 MHz; CDCl<sub>3</sub>) 17.4, 28.7, 28.8, 101.9, 103.5, 105.9, 108.1, 113.8, 129.4, 131.1, 132.4, 135.7, 144.6, 145.6, 148.1, 170.1; HRMS (ES<sup>+</sup>, Ar) calcd for C<sub>18</sub>H<sub>17</sub>NO<sub>8</sub>SNa (MNa<sup>+</sup>) 430.0567, found 430.0566;  $[\alpha]_D^{25}$  +34.26 (c 1.0 in CHCl<sub>3</sub>); HPLC: Chiralcel OD-H (pet ether/*i*-PrOH = 90/10, flow rate 0.5 mL/min,  $\lambda$  = 250 nm),  $t_R$  (major) = 123.8 min,  $t_R$  (minor) = 118.6 min; 90% ee.

**(R)-o-Tolyl 4-nitro-4-(phenylsulfonyl)pentanoate (3e).** Colorless solid; Yield 148 mg, 98%;

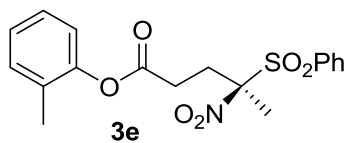

mp 93-94 °C;  $\nu_{\max}$ (film)/cm<sup>-1</sup> 3067w, 3026w, 2923w, 1758s, 1583w, 1555s, 1491w, 1449w, 1385w, 1334s, 1314m, 1251w, 1223m, 1156vs, 1111w, 1076w, 948w, 917w, 848w, 752m, 720w, 688w, 617w, 603w;  $\delta_H$ (400 MHz; CDCl<sub>3</sub>) 2.01 (3H, s), 2.14 (3H,

s), 2.61 (1H, ddd,  $J$  16.5, 9.6, 5.4 Hz), 2.74 (1H, ddd,  $J$  16.5, 10.9, 4.6 Hz), 2.77 (1H, ddd,  $J$  15.6, 9.6, 4.6 Hz), 2.90 (1H, ddd,  $J$  15.6, 10.9, 5.4 Hz), 6.98 (1H, dd,  $J$  7.6, 1.5 Hz), 7.15 (1H, td,  $J$  7.6, 1.5 Hz), 7.18 (1H, dd,  $J$  7.6, 1.5 Hz), 7.22 (1H, td,  $J$  7.6, 1.5 Hz), 7.61 (2H, t,  $J$  8.0 Hz), 7.77 (1H, tt,  $J$  8.0, 1.1 Hz), 7.89 (2H, dd,  $J$  8.0, 1.1 Hz);  $\delta_C$ (100 MHz; CDCl<sub>3</sub>) 16.3, 17.4, 28.6, 28.9, 106.0, 121.7, 126.4, 127.1, 129.4, 129.9, 131.2, 131.3, 132.5, 135.7, 149.1, 169.5; HRMS (ES<sup>+</sup>, Ar) calcd for C<sub>18</sub>H<sub>19</sub>NO<sub>6</sub>SNa (MNa<sup>+</sup>) 400.0825, found 400.0825;  $[\alpha]_D^{25}$  +27.35 (c 1.0 in CHCl<sub>3</sub>); HPLC: Chiralpak AD-H (pet ether/*i*-PrOH = 98/2, flow rate 0.5 mL/min,  $\lambda$  = 250 nm),  $t_R$  (major) = 61.2 min,  $t_R$  (minor) = 70.3 min; 84% ee.

**(R)-Phenyl 4-nitro-4-(phenylsulfonyl)pentanoate (3f).** Colorless solid; Yield 140 mg, 97%;

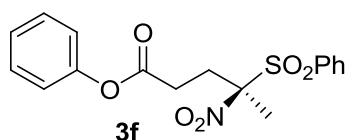

mp 110-112 °C;  $\nu_{\max}(\text{film})/\text{cm}^{-1}$  3067w, 2950w, 1758vs, 1583w, 1592w, 1554vs, 1493w, 1449w, 1386m, 1334vs, 1315s, 1197s, 1156s, 1075m, 943w, 848w, 754m, 688w, 610w;  $\delta_{\text{H}}(400 \text{ MHz}; \text{CDCl}_3)$  2.00 (3H, s), 2.59 (1H, ddd,  $J$  16.3, 10.4, 5.6 Hz), 2.72 (1H, ddd,  $J$  16.3, 10.6, 4.9 Hz), 2.75 (1H, ddd,  $J$  15.6, 10.4, 4.9 Hz), 2.89 (1H, ddd,  $J$  15.6, 10.6, 5.6 Hz), 7.06 (2H, dd,  $J$  7.7, 1.0 Hz), 7.24 (1H, tt,  $J$  7.7, 1.0 Hz), 7.38 (2H, t,  $J$  7.7 Hz), 7.61 (2H, t,  $J$  7.9 Hz), 7.63 (1H, tt,  $J$  7.9, 1.1 Hz), 7.91 (2H, dd,  $J$  7.9, 1.1 Hz);  $\delta_{\text{C}}(100 \text{ MHz}; \text{CDCl}_3)$  17.4, 28.8 ( $\times 2$ ), 106.0, 121.4, 126.3, 129.4, 129.6, 131.2, 132.5, 135.7, 150.4, 169.8; HRMS ( $\text{ES}^+$ , Ar) calcd for  $\text{C}_{17}\text{H}_{17}\text{NO}_6\text{SNa}$  ( $\text{MNa}^+$ ) 386.0669, found 386.0665;  $[\alpha]_{\text{D}}^{25} +30.64$  (c 1.0 in  $\text{CHCl}_3$ ); HPLC: Lux cellulose-1 (pet ether/*i*-PrOH = 95/5, flow rate 0.5 mL/min,  $\lambda = 258 \text{ nm}$ ),  $t_{\text{R}}$  (major) = 67.4 min,  $t_{\text{R}}$  (minor) = 65.4 min; 89% ee.

**(R)-4-Fluorophenyl 4-nitro-4-(phenylsulfonyl)pentanoate (3g).** Colorless solid; Yield 148

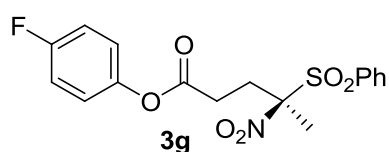

mg, 97%; mp 101-103 °C;  $\nu_{\max}(\text{film})/\text{cm}^{-1}$  3071w, 2931w, 2868w, 1757vs, 1547m, 1502m, 1448w, 1388w, 1331s, 1316s, 1251w, 1188s, 1158s, 1089w, 1076w, 916w, 847w, 762s;  $\delta_{\text{H}}(400 \text{ MHz}; \text{CDCl}_3)$  1.99 (3H, s), 2.58 (1H, ddd,  $J$  16.5, 10.6, 5.5 Hz), 2.71 (1H, ddd,  $J$  16.5, 10.8, 4.7 Hz), 2.74 (1H, ddd,  $J$  15.7, 10.6, 4.7 Hz), 2.89 (1H, ddd,  $J$  15.7, 10.8, 5.5 Hz), 6.98-7.08 (4H, m), 7.61 (2H, t,  $J$  7.9 Hz), 7.77 (1H, tt,  $J$  7.9, 1.1 Hz), 7.88 (2H, dd,  $J$  7.9, 1.1 Hz);  $\delta_{\text{C}}(100 \text{ MHz}; \text{CDCl}_3)$  17.5, 28.7 ( $\times 2$ ), 105.9, 116.3 (d,  $J_{\text{C-F}}$  23.0 Hz), 122.9 (d,  $J_{\text{C-F}}$  9.0 Hz), 129.5, 131.2, 132.4, 135.7, 146.2 (d,  $J_{\text{C-F}}$  3.0 Hz), 160.4 (d,  $J_{\text{C-F}}$  244.0 Hz), 169.8;  $\delta_{\text{F}}(470 \text{ MHz}; \text{CDCl}_3)$  116.37 (tt,  $J$  8, 4.0 Hz); HRMS ( $\text{ES}^+$ , Ar) calcd for  $\text{C}_{17}\text{H}_{16}\text{FNO}_6\text{SNa}$  ( $\text{MNa}^+$ ) 404.0575, found 404.0581;  $[\alpha]_{\text{D}}^{25} +27.41$  (c 1.0 in  $\text{CHCl}_3$ ); HPLC: chiralcel OD-H (pet ether/*i*-PrOH = 90/10, flow rate 0.5 mL/min,  $\lambda = 250 \text{ nm}$ ),  $t_{\text{R}}$  (major) = 51.3 min,  $t_{\text{R}}$  (minor) = 48.2 min; 86% ee.

**(R)-4-Chlorophenyl 4-nitro-4-(phenylsulfonyl)pentanoate (3h).** Colorless solid; Yield 152

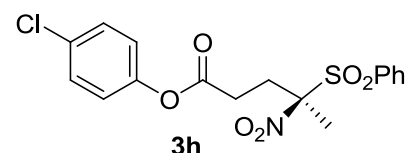

mg, 96%; mp 89-90 °C;  $\nu_{\max}(\text{film})/\text{cm}^{-1}$  3098w, 3069w, 2930w, 1760s, 1583w, 1554s, 1487m, 1449w, 1386w, 1334s, 1314m, 1202s, 1156vs, 1087m, 1076m, 1015w, 847w, 757w, 688w, 605w;  $\delta_{\text{H}}(400 \text{ MHz}; \text{CDCl}_3)$  1.98 (3H, s), 2.59 (1H, ddd,  $J$  16.5, 10.7, 5.5 Hz), 2.72 (1H, ddd,  $J$  16.5, 10.8, 4.6 Hz), 2.75 (1H, ddd,  $J$  15.7, 10.7, 4.6 Hz), 2.89 (1H, ddd,  $J$  15.7, 10.8, 5.5 Hz), 7.01 (2H, d,  $J$  8.8 Hz), 7.33 (2H, d,  $J$  8.8 Hz), 7.61 (2H, t,  $J$  7.9 Hz), 7.77 (1H, tt,  $J$  7.9, 1.1 Hz), 7.88 (2H, dd,  $J$  7.9, 1.1 Hz);  $\delta_{\text{C}}(100 \text{ MHz}; \text{CDCl}_3)$  17.6, 28.7, 28.8, 105.9, 122.8, 129.5, 129.7, 131.2, 131.6, 132.5, 135.7, 148.9, 169.6; HRMS ( $\text{ES}^+$ , Ar) calcd for  $\text{C}_{17}\text{H}_{16}\text{ClNO}_6\text{SNa}$  ( $\text{MNa}^+$ ) 420.0279, found 420.0285;  $[\alpha]_{\text{D}}^{25} +32.92$  (c 1.0 in  $\text{CHCl}_3$ ); HPLC: Chiralcel OD-H (pet ether/*i*-PrOH = 95/5, flow rate 0.5 mL/min,  $\lambda = 258 \text{ nm}$ ),  $t_{\text{R}}$  (major) = 93.6 min,  $t_{\text{R}}$  (minor) = 85.5 min; 85% ee.

**(R)-4-Bromophenyl 4-nitro-4-(phenylsulfonyl)pentanoate (3i).** Colorless solid; Yield 176

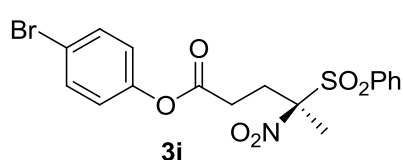

mg, 99%; mp 101-103 °C;  $\nu_{\max}(\text{film})/\text{cm}^{-1}$  3060w, 2930w, 2863w, 1759s, 1553s, 1484w, 1449w, 1382w, 1333m, 1311m, 1201m, 1155vs, 1074w, 913w, 847w, 752m;  $\delta_{\text{H}}(400 \text{ MHz}; \text{CDCl}_3)$  1.99 (3H, s), 2.60 (1H, ddd,  $J$  16.5, 10.7, 5.5 Hz), 2.72 (1H, ddd,  $J$  16.5, 10.8, 4.5 Hz), 2.75 (1H, ddd,  $J$  15.6, 10.7, 4.5 Hz), 2.88 (1H, ddd,  $J$  15.6, 10.8, 5.5 Hz), 6.95 (2H, d,  $J$  8.9 Hz), 7.49 (2H, d,  $J$  8.9 Hz), 7.62 (2H, t,  $J$  7.9 Hz), 7.78 (1H, tt,  $J$  7.9, 1.2 Hz), 7.88 (2H, dd,  $J$  7.9, 1.2 Hz);  $\delta_{\text{C}}(100 \text{ MHz}; \text{CDCl}_3)$  17.6, 28.8 ( $\times 2$ ), 105.9, 119.4, 123.3, 129.5, 131.2, 132.5, 132.7, 135.7, 149.4, 169.5; HRMS ( $\text{ES}^+$ , Ar) calcd for  $\text{C}_{17}\text{H}_{16}\text{BrNO}_6\text{SNa}$  ( $\text{MNa}^+$ ) 463.9774, found 463.9761;  $[\alpha]_{\text{D}}^{25} +32.60$

(c 1.0 in CHCl<sub>3</sub>); HPLC: Chiralcel OD-H (pet ether/*i*-PrOH = 90/10, flow rate 0.5 mL/min, λ = 250 nm), *t*<sub>R</sub> (major) = 67.2 min, *t*<sub>R</sub> (minor) = 62.5 min; 84% ee.

**(R)-3-Nitrophenyl 4-nitro-4-(phenylsulfonyl)pentanoate (3j).** Colorless solid; Yield 140

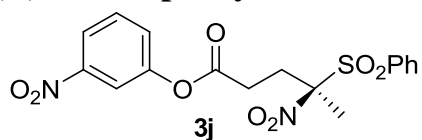

mg, 86%; mp 103-105 °C;  $\nu_{\max}(\text{film})/\text{cm}^{-1}$  3098w, 2931w, 2873w, 1767s, 1553s, 1532s, 1477w, 1449w, 1384w, 1352s, 1335s, 1210m, 1155s, 1076w, 814w, 759w, 744w, 611w;  $\delta_{\text{H}}(400 \text{ MHz}; \text{CDCl}_3)$  2.00 (3H, s), 2.68 (1H, ddd, *J* 13.9, 9.3, 4.3 Hz), 2.72-2.88 (2H, m), 2.92 (1H, ddd, *J* 13.0, 9.3, 4.5 Hz), 7.44 (1H, ddd, *J* 8.2, 2.2, 1.0 Hz), 7.57 (1H, t, *J* 8.2 Hz), 7.63 (2H, t, *J* 7.9 Hz), 7.79 (1H, tt, *J* 7.9, 1.2 Hz), 7.89 (2H, dd, *J* 7.9, 1.2 Hz), 7.98 (1H, t, *J* 2.2 Hz), 8.12 (1H, ddd, *J* 7.5, 2.2, 1.0 Hz);  $\delta_{\text{C}}(100 \text{ MHz}; \text{CDCl}_3)$  17.8, 28.7, 28.8, 105.8, 117.3, 121.3, 128.0, 129.5, 130.4, 131.2, 132.5, 135.8, 148.9, 150.6, 169.3; HRMS (ES<sup>+</sup>, Ar) calcd for C<sub>17</sub>H<sub>16</sub>N<sub>2</sub>O<sub>8</sub>SNa (MNa<sup>+</sup>) 431.0520, found 431.0516;  $[\alpha]_{\text{D}}^{25} +32.72$  (c 1.0 in CHCl<sub>3</sub>); HPLC: Chiralcel OD-H (pet ether/*i*-PrOH = 90/10, flow rate 1.0 mL/min, λ = 250 nm), *t*<sub>R</sub> (major) = 74.2 min, *t*<sub>R</sub> (minor) = 67.6 min; 92% ee.

**(R)-2-Chlorophenyl 4-nitro-4-(phenylsulfonyl)pentanoate (3k).** Colorless solid; Yield 150

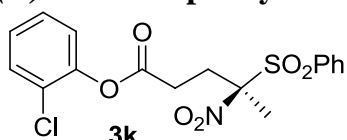

mg, 94%; mp 97-99 °C;  $\nu_{\max}(\text{film})/\text{cm}^{-1}$  3070w, 2929w, 2873w, 1767vs, 1583m, 1555vs, 1477m, 1449m, 1386m, 1334s, 1315m, 1217m, 1155vs, 1076w, 1063w, 916w, 848w, 831w, 755s, 688m, 604m;  $\delta_{\text{H}}(400 \text{ MHz}; \text{CDCl}_3)$  2.00 (3H, s), 2.59-2.69 (1H, m), 2.71-2.85 (2H, m), 2.86-2.96 (1H, m), 7.11 (1H, dd, *J* 7.8, 1.6 Hz), 7.19 (1H, td, *J* 7.8, 1.6 Hz), 7.27 (1H, td, *J* 7.8, 1.6 Hz), 7.42 (1H, dd, *J* 7.8, 1.6 Hz), 7.62 (2H, t, *J* 7.9 Hz), 7.75 (1H, tt, *J* 7.9, 1.1 Hz), 7.88 (2H, dd, *J* 7.9, 1.1 Hz);  $\delta_{\text{C}}(100 \text{ MHz}; \text{CDCl}_3)$  17.3, 28.5, 28.8, 105.9, 123.6, 126.7, 127.5, 128.0, 129.4, 130.4, 131.1, 132.4, 135.7, 146.6, 168.9; HRMS (ES<sup>+</sup>, Ar) calcd for C<sub>17</sub>H<sub>16</sub>ClNO<sub>6</sub>SNa (MNa<sup>+</sup>) 420.0279, found 420.0274;  $[\alpha]_{\text{D}}^{25} +28.80$  (c 1.0 in CHCl<sub>3</sub>); HPLC: Chiralcel OD-H (pet ether/*i*-PrOH = 90/10, flow rate 0.5 mL/min, λ = 250 nm), *t*<sub>R</sub> (major) = 55.5 min, *t*<sub>R</sub> (minor) = 54.5 min; 94% ee.

**(R)-2-Bromophenyl 4-nitro-4-(phenylsulfonyl)pentanoate (3l).** Colorless solid; Yield 166

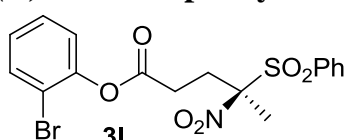

mg, 94%; mp 81-83 °C;  $\nu_{\max}(\text{film})/\text{cm}^{-1}$  3067w, 3026w, 2921w, 1767s, 1582w, 1554s, 1471m, 1448m, 1385w, 1334s, 1314m, 1249w, 1212m, 1155s, 1075w, 1046w, 848w, 828w, 754m, 720w, 688w, 604w;  $\delta_{\text{H}}(400 \text{ MHz}; \text{CDCl}_3)$  2.02 (3H, s), 2.65 (1H, ddd, *J* 16.4, 10.9, 5.3 Hz), 2.76 (1H, ddd, *J* 16.4, 10.2, 4.3 Hz), 2.80 (1H, ddd, *J* 15.6, 10.9, 4.3 Hz), 2.92 (1H, ddd, *J* 15.6, 10.2, 5.3 Hz), 7.11 (1H, dd, *J* 7.9, 1.5 Hz), 7.14 (1H, td, *J* 7.9, 1.5 Hz), 7.33 (1H, td, *J* 7.9, 1.5 Hz), 7.60 (1H, dd, *J* 7.9, 1.5 Hz), 7.62 (2H, t, *J* 7.7 Hz), 7.78 (1H, tt, *J* 7.7, 1.2 Hz), 7.89 (2H, dd, *J* 7.7, 1.2 Hz);  $\delta_{\text{C}}(100 \text{ MHz}; \text{CDCl}_3)$  17.4, 28.7, 28.9, 106.0, 116.1, 123.7, 127.9, 128.8, 129.5, 131.3, 132.5, 133.6, 135.7, 147.9, 169.0; HRMS (ES<sup>+</sup>, Ar) calcd for C<sub>17</sub>H<sub>16</sub>BrNO<sub>6</sub>SNa (MNa<sup>+</sup>) 463.9774, found 463.9773;  $[\alpha]_{\text{D}}^{25} +21.69$  (c 1.0 in CHCl<sub>3</sub>); HPLC: Chiralpak AD-H (pet ether/*i*-PrOH = 98/2, flow rate 0.5 mL/min, λ = 250 nm), *t*<sub>R</sub> (major) = 80.5 min, *t*<sub>R</sub> (minor) = 100.9 min; 91% ee.

**(R)-Naphthalen-2-yl 4-nitro-4-(phenylsulfonyl)pentanoate (3m).** Colorless solid; Yield 148

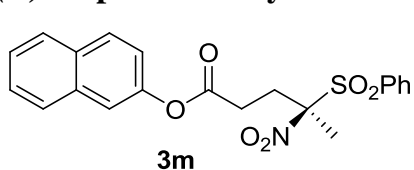

mg, 90%; mp 139-142 °C;  $\nu_{\max}(\text{film})/\text{cm}^{-1}$  2928w, 2852w, 1758m, 1554m, 1449w, 1386w, 1334w, 1210w, 1157vs, 1075w, 759s;  $\delta_{\text{H}}(400 \text{ MHz}; \text{CDCl}_3)$  2.03 (3H, s), 2.66 (1H, ddd, *J* 16.5, 10.8, 5.5 Hz), 2.76 (1H, ddd, *J* 16.5, 10.9, 4.4 Hz), 2.81 (1H, ddd, *J* 15.7, 10.8, 4.4 Hz), 2.93 (1H, ddd, *J* 15.7, 10.9, 5.5 Hz), 7.19 (2H, dd, *J* 8.9, 2.3 Hz), 7.48 (1H, td, *J* 7.0, 1.7 Hz), 7.51 (1H, td, *J* 7.0, 1.7

H<sub>z</sub>), 7.54 (1H, d, *J* 2.3 Hz), 7.63 (2H, t, *J* 8.1 Hz), 7.78 (1H, tt, *J* 8.1, 1.1 Hz), 7.78-7.82 (1H, m), 7.83-7.86 (1H, m), 7.85 (1H, d, *J* 8.9 Hz), 7.91 (2H, dd, *J* 8.1, 1.1 Hz);  $\delta_{\text{C}}$ (100 MHz; CDCl<sub>3</sub>) 17.5, 28.9, 106.0, 118.5, 120.8, 126.1, 126.9, 127.8, 127.9, 129.5, 129.7, 131.2, 131.7, 132.5, 133.8, 135.7, 148.1, 170.0; HRMS (ES<sup>+</sup>, Ar) calcd for C<sub>21</sub>H<sub>19</sub>NO<sub>6</sub>SNa (MNa<sup>+</sup>) 436.0825, found 436.0824;  $[\alpha]_{\text{D}}^{25} +41.79$  (c 1.0 in CHCl<sub>3</sub>); HPLC: Chiralcel OD-H (pet ether/*i*-PrOH = 70/30, flow rate 1.0 mL/min,  $\lambda = 250$  nm),  $t_{\text{R}}$  (major) = 51.4 min,  $t_{\text{R}}$  (minor) = 39.9 min; 86% ee.

**(R)-Naphthalen-1-yl 4-nitro-4-(phenylsulfonyl)pentanoate (3n).** Colorless sticky oil; Yield

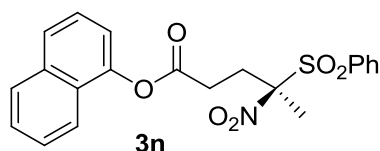

155 mg, 94%;  $\nu_{\text{max}}$ (neat)/cm<sup>-1</sup> 3065w, 2947w, 1761s, 1598w, 1554s, 1448w, 1387m, 1334s, 1225w, 1155vs, 1113w, 1076w, 773m;  $\delta_{\text{H}}$ (400 MHz; CDCl<sub>3</sub>) 2.03 (3H, s), 2.72-2.87 (m, 2H), 2.89-3.04 (2H, m), 7.25 (1H, dd, *J* 7.9, 0.7 Hz), 7.46 (1H, t, *J* 7.9 Hz), 7.79-7.83 (1H, m), 7.85-7.90 (1H, m), 7.91 (2H, dd, *J*

7.9, 0.9 Hz);  $\delta_{\text{C}}$ (100 MHz; CDCl<sub>3</sub>) 17.4, 28.6, 28.9, 105.9, 118.0, 120.9, 125.4, 126.4, 126.5, 126.6, 126.7, 128.2, 129.4, 131.1, 132.4, 134.6, 135.6, 146.2, 169.8; HRMS (ES<sup>+</sup>, Ar) calcd for C<sub>21</sub>H<sub>19</sub>NO<sub>6</sub>SNa (MNa<sup>+</sup>) 436.0825, found 436.0823;  $[\alpha]_{\text{D}}^{25} +22.77$  (c 1.0 in CHCl<sub>3</sub>); HPLC: Chiralcel OD-H (pet ether/*i*-PrOH = 90/10, flow rate 0.5 mL/min,  $\lambda = 250$  nm),  $t_{\text{R}}$  (major) = 130.7 min,  $t_{\text{R}}$  (minor) = 148.5 min; 93% ee.

**(R)-Methyl 4-nitro-4-(phenylsulfonyl)pentanoate (3o).** Colorless oil; Yield 110 mg, 91%;

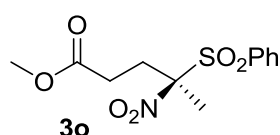

$\nu_{\text{max}}$ (neat)/cm<sup>-1</sup> 3020w, 2954w, 1739vs, 1583w, 1553vs, 1448m, 1385w, 1333s, 1314m, 1202m, 1178m, 1155s, 1076w, 998vw, 931vw, 847w, 758m, 721w, 689w, 607m, 550w;  $\delta_{\text{H}}$ (400 MHz; CDCl<sub>3</sub>) 1.93 (3H, s), 2.30 (1H, ddd, *J* 16.2, 10.3, 5.8 Hz), 2.45 (1H, ddd, *J* 16.2, 10.2, 5.4 Hz), 2.59 (1H, ddd, *J* 15.4, 10.3, 5.4 Hz), 2.75 (1H, ddd, *J* 15.4, 10.2,

5.8 Hz), 3.67 (3H, s), 7.60 (2H, t, *J* 7.9 Hz), 7.76 (1H, tt, *J* 7.9, 1.1 Hz), 7.85 (2H, dd, *J* 7.9, 1.1 Hz);  $\delta_{\text{C}}$ (100 MHz; CDCl<sub>3</sub>) 17.1, 28.4, 28.9, 52.3, 106.1, 129.4, 131.2, 132.5, 135.6, 171.6; HRMS (ES<sup>+</sup>, Ar) calcd for C<sub>12</sub>H<sub>15</sub>NO<sub>6</sub>SNa (MNa<sup>+</sup>) 324.0512, found 324.0512;  $[\alpha]_{\text{D}}^{25} +18.84$  (c 1.0 in CHCl<sub>3</sub>); HPLC: Chiralcel OD-H (pet ether/*i*-PrOH = 90/10, flow rate 0.5 mL/min,  $\lambda = 250$  nm),  $t_{\text{R}}$  (major) = 71.9 min,  $t_{\text{R}}$  (minor) = 32.1 min; 94% ee.

**(R)-Ethyl 4-nitro-4-(phenylsulfonyl)pentanoate (3p).** Colorless solid; Yield 125 mg, 99%;

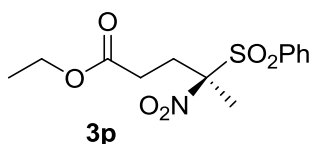

mp 69-71 °C;  $\nu_{\text{max}}$ (film)/cm<sup>-1</sup> 3067w, 2984m, 2942w, 1733vs, 1583w, 1555vs, 1449m, 1384w, 1334s, 1314m, 1263vw, 1191m, 1156s, 1112w, 1095w, 1076m, 1022w, 999w, 919w, 846m, 757m, 721m, 689m, 607m, 552w, 553w;  $\delta_{\text{H}}$ (400 MHz; CDCl<sub>3</sub>) 1.24 (3H, t, *J* 7.1 Hz), 1.94 (3H, s), 2.30 (1H, ddd, *J* 16.2, 10.3, 5.8 Hz), 2.45 (1H, ddd,

*J* 16.2, 10.2, 5.4 Hz), 2.59 (1H, ddd, *J* 15.3, 10.3, 5.4 Hz), 2.75 (1H, ddd, *J* 15.3, 10.2, 5.8 Hz), 4.12 (2H, q, *J* 7.1 Hz), 7.61 (2H, t, *J* 8.1 Hz), 7.76 (1H, tt, *J* 8.1, 1.2 Hz), 7.86 (2H, dd, *J* 8.1, 1.2 Hz);  $\delta_{\text{C}}$ (100 MHz; CDCl<sub>3</sub>) 14.3, 17.1, 28.7, 29.0, 61.4, 106.2, 129.4, 131.2, 132.6, 135.6, 171.1; HRMS (ES<sup>+</sup>, Ar) calcd for C<sub>13</sub>H<sub>17</sub>NO<sub>6</sub>SNa (MNa<sup>+</sup>) 338.0669, found 338.0669;  $[\alpha]_{\text{D}}^{25} +18.57$  (c 1.0 in CHCl<sub>3</sub>); HPLC: Chiralcel OD-H (pet ether/*i*-PrOH = 90/10, flow rate 0.5 mL/min,  $\lambda = 250$  nm),  $t_{\text{R}}$  (major) = 46.7 min,  $t_{\text{R}}$  (minor) = 28.3 min; 95% ee.

**(R)-Naphthalen-1-yl 4-nitro-4-(phenylsulfonyl)hexanoate (4a).** Colorless solid; Yield 170

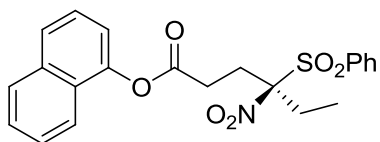

mg, 99%; mp 102-104 °C;  $\nu_{\text{max}}$ (film)/cm<sup>-1</sup> 3065m, 2984m, 2949m, 2886w, 1760s, 1598m, 1582m, 1554s, 1509w, 1462m, 1448m, 1388m, 1331s, 1314s, 1259w, 1224m, 1152s, 1076m, 1038vw, 1014vw, 936w, 870w, 822m, 796m, 774s, 757s, 688m,

4a

617m, 598m, 555m;  $\delta_{\text{H}}$ (400 MHz;  $\text{CDCl}_3$ ) 1.08 (3H, t,  $J$  7.4 Hz), 2.39 (2H, ABqq,  $J$  14.9, 7.4 Hz), 2.76-2.85 (1H, m), 3.05-3.16 (2H, m), 3.27-3.37 (1H, m), 7.30 (1H, dd,  $J$  7.8, 0.8 Hz), 7.48 (1H, t,  $J$  7.8 Hz), 7.53 (1H, td,  $J$  7.5, 2.0 Hz), 7.55 (1H, td,  $J$  7.5, 2.0 Hz), 7.61 (2H, t,  $J$  8.1 Hz), 7.75 (1H, tt,  $J$  8.1, 1.0 Hz), 7.77 (1H, dd,  $J$  7.8, 0.8 Hz), 7.88 (1H, dd,  $J$  7.5, 2.0 Hz), 7.89 (1H, dd,  $J$  7.5, 2.0 Hz), 7.93 (2H, dd,  $J$  8.1, 1.0 Hz);  $\delta_{\text{C}}$ (100 MHz;  $\text{CDCl}_3$ ) 8.3, 25.7, 26.6, 29.1, 109.3, 118.1, 121.1, 125.5, 126.4, 126.7 ( $\times 2$ ), 126.8, 128.2, 129.3, 131.2, 133.4, 134.8, 135.5, 146.5, 170.5; HRMS ( $\text{ES}^+$ , Ar) calcd for  $\text{C}_{22}\text{H}_{21}\text{NO}_6\text{SNa}$  ( $\text{MNa}^+$ ) 450.0982, found 450.0988;  $[\alpha]_{\text{D}}^{25} +28.23$  (c 1.0 in  $\text{CHCl}_3$ ); HPLC: Lux Cellulose-1 (pet ether/*i*-PrOH = 80/20, flow rate 1.0 mL/min,  $\lambda = 250$  nm),  $t_{\text{R}}$  (major) = 30.8 min,  $t_{\text{R}}$  (minor) = 24.6 min; 92% ee.

**(S)-Naphthalen-1-yl 4-nitro-4-(phenylsulfonyl)hept-6-enoate (4b).** Colorless solid; Yield

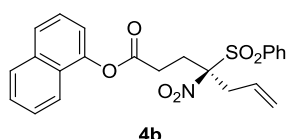

175 mg, 99%; mp 93-95 °C;  $\nu_{\text{max}}$ (film)/ $\text{cm}^{-1}$  3065w, 2986vw, 1761s, 1599vw, 1555s, 1448w, 1385w, 1335s, 1315m, 1225w, 1151vs, 1082w, 936w, 800w, 739s, 688w, 611w, 554w;  $\delta_{\text{H}}$ (400 MHz;  $\text{CDCl}_3$ ) 2.80 (1H, ddd,  $J$  16.9, 10.7, 4.2 Hz), 2.98-3.19 (4H, m), 3.30 (1H, ddd,  $J$  16.9, 10.7, 4.2 Hz), 5.34 (1H, dd,  $J$  17.8, 1.0 Hz), 5.35 (1H, dd,  $J$  10.4, 1.0 Hz), 5.75 (1H, ddt,  $J$  17.8, 10.4, 7.1 Hz), 7.27 (1H, d,  $J$  7.6 Hz), 7.47 (1H, t,  $J$  7.6 Hz), 7.50-7.56 (2H, m), 7.64 (2H, t,  $J$  8.1 Hz), 7.76 (1H, d,  $J$  7.6 Hz), 7.79 (1H, t,  $J$  8.1, 1.1 Hz), 7.81-7.85 (1H, m), 7.86-7.91 (1H, m), 7.94 (2H, dd,  $J$  8.1, 1.1 Hz);  $\delta_{\text{C}}$ (100 MHz;  $\text{CDCl}_3$ ) 26.5, 28.9, 37.2, 107.9, 118.1, 121.1, 123.1, 125.5, 126.4, 126.7 ( $\times 2$ ), 126.8, 128.2 ( $\times 2$ ), 129.5, 131.3, 133.2, 134.8, 135.7, 146.5, 170.4; HRMS ( $\text{ES}^+$ , Ar) calcd for  $\text{C}_{23}\text{H}_{21}\text{NO}_6\text{SNa}$  ( $\text{MNa}^+$ ) 462.0982, found 462.0982;  $[\alpha]_{\text{D}}^{25} +27.30$  (c 1.0 in  $\text{CHCl}_3$ ); HPLC: Lux Cellulose-1 (pet ether/*i*-PrOH = 80/20, flow rate 1.0 mL/min,  $\lambda = 250$  nm),  $t_{\text{R}}$  (major) = 19.3 min,  $t_{\text{R}}$  (minor) = 17.4 min; 93% ee.

**(R)-Naphthalen-1-yl 4-nitro-4-(phenylsulfonyl)octanoate (4c).** Colorless solid; Yield 176 mg, 97%; mp 108-109 °C;  $\nu_{\text{max}}$ (film)/ $\text{cm}^{-1}$  2961w, 2935w,

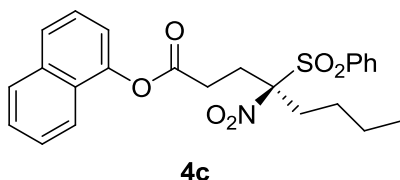

2873w, 1760s, 1646w, 1553s, 1509vw, 1448w, 1385w, 1331s, 1314m, 1259vw, 1225w, 1150vs, 1079w, 798m, 775m, 756m, 775s, 756s, 738s, 688m, 619w, 550w;  $\delta_{\text{H}}$ (400 MHz;  $\text{CDCl}_3$ ) 0.93 (3H, t,  $J$  7.3 Hz), 1.16-1.27 (1H, m), 1.31-1.43 (2H, m), 1.54-1.65 (1H, m), 2.33 (2H, ABqdd,  $J$  14.7, 11.6, 4.8 Hz), 2.72-2.85 (1H, m), 3.02-3.12 (2H, m), 3.25-3.39 (1H, m), 7.29 (1H, dd,  $J$  7.8, 0.9 Hz), 7.48 (1H, t,  $J$  7.8 Hz), 7.53 (1H, td,  $J$  6.9, 1.9 Hz), 7.55 (1H, td,  $J$  6.9, 2.0 Hz), 7.62 (2H, t,  $J$  8.1 Hz), 7.77 (1H, tt overlap with dd,  $J$  8.1, 1.1 Hz), 7.77 (1H, dd overlap with tt,  $J$  7.8, 0.9 Hz), 7.84-7.91 (2H, m), 7.93 (2H, dd,  $J$  8.1, 1.1 Hz), confirmed by  $^1\text{H}$ - $^1\text{H}$ -COSY spectrum;  $\delta_{\text{C}}$ (100 MHz;  $\text{CDCl}_3$ ) 13.8, 22.8, 25.8, 26.3, 29.3, 32.5, 109.0, 118.2, 121.2, 125.5, 126.4, 126.7, 126.8 ( $\times 2$ ), 128.3, 129.4, 131.2, 133.4, 134.8, 135.6, 146.5, 170.5; HRMS ( $\text{ES}^+$ , Ar) calcd for  $\text{C}_{24}\text{H}_{25}\text{NO}_6\text{SNa}$  ( $\text{MNa}^+$ ) 478.1295, found 478.1308;  $[\alpha]_{\text{D}}^{25} +19.98$  (c 1.0 in  $\text{CHCl}_3$ ); HPLC: Lux Cellulose-1 (pet ether/*i*-PrOH = 80/20, flow rate 1.0 mL/min,  $\lambda = 250$  nm),  $t_{\text{R}}$  (major) = 18.7 min,  $t_{\text{R}}$  (minor) = 16.6 min; 92% ee.

**(R)-Naphthalen-1-yl 4-nitro-4-(phenylsulfonyl)nonanoate (4d).** Colorless solid; Yield 179 mg, 95%; mp 99-100 °C;  $\nu_{\text{max}}$ (film)/ $\text{cm}^{-1}$  2956w, 2934w,

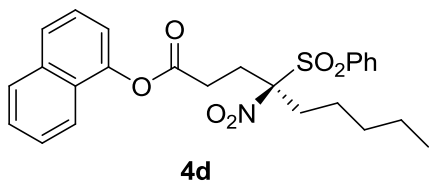

2874w, 1762m, 1646w, 1553s, 1448w, 1385w, 1331m, 1225w, 1150vs, 1080w, 773w, 688w, 620w;  $\delta_{\text{H}}$ (400 MHz;  $\text{CDCl}_3$ ) 0.89 (3H, t,  $J$  7.0 Hz), 1.16-1.42 (5H, m), 1.54-1.67 (1H, m), 2.32 (2H, ABqdd,  $J$  14.7, 11.6, 4.5 Hz), 2.71-2.85 (1H, m), 3.03-3.14 (2H, m), 3.26-3.40 (1H, m), 7.29 (1H, d,  $J$  7.8 Hz), 7.48 (1H, t,  $J$  7.8 Hz), 7.53 (1H, td,  $J$  6.8, 1.9 Hz), 7.55 (1H, td,  $J$  6.8, 1.9 Hz), 7.62



(2H, t,  $J$  7.7 Hz), 7.76 (1H, tt overlap with d,  $J$  7.7, 1.2 Hz), 7.77 (1H, d overlap with tt,  $J$  7.8 Hz), 7.84-7.91 (2H, m), 7.93 (2H, dd,  $J$  7.7, 1.2 Hz);  $\delta_C$ (100 MHz; CDCl<sub>3</sub>) 14.0, 22.3, 23.4, 26.2, 29.2, 31.6, 32.7, 108.9, 118.1, 121.1, 125.5, 126.4, 126.7, 126.8, 128.2, 129.4, 131.2, 133.4, 134.8, 135.6, 146.5, 170.5; HRMS (ES<sup>+</sup>, Ar) calcd for C<sub>25</sub>H<sub>27</sub>NO<sub>6</sub>SNa (MNa<sup>+</sup>) 492.1451, found 492.1451;  $[\alpha]_D^{25}$  +14.30 (c 1.0 in CHCl<sub>3</sub>); HPLC: Lux Cellulose-1 (pet ether/*i*-PrOH = 80/20, flow rate 1.0 mL/min,  $\lambda$  = 250 nm),  $t_R$  (major) = 22.6 min,  $t_R$  (minor) = 19.3 min; 92% ee.

**(R)-Naphthalen-1-yl 4-nitro-4-(phenylsulfonyl)undecanoate (4e).** Colorless solid; Yield

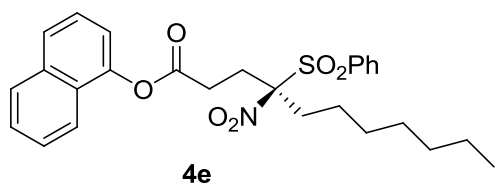

185 mg, 93%; mp 92-94 °C;  $\nu_{\max}$ (film)/cm<sup>-1</sup> 2930w, 2857w, 1762m, 1648w, 1554m, 1448w, 1386w, 1332m, 1225w, 1151s, 1081w, 739m;  $\delta_H$  (400 MHz; CDCl<sub>3</sub>) 0.88 (3H, t,  $J$  6.8 Hz), 1.18-1.40 (9H, m), 1.54-1.67 (1H, m), 2.32 (2H, ABqdd,  $J$  14.6, 11.6, 4.6 Hz), 2.74-2.84 (1H, m), 3.02-3.13 (2H, m), 3.25-3.36 (1H, m), 7.29 (1H, dd,  $J$  7.7, 0.7 Hz), 7.48 (1H, t,  $J$  7.7 Hz), 7.53 (1H, td,  $J$  6.9, 1.8 Hz), 7.55 (1H, td,  $J$  6.9, 1.8 Hz), 7.62 (2H, t,  $J$  7.9 Hz), 7.77 (1H, dd overlap with tt,  $J$  7.7, 0.7 Hz), 7.77 (1H, tt overlap with dd,  $J$  7.9, 1.2 Hz), 7.84-7.91 (2H, m), 7.93 (2H, dd,  $J$  7.9, 1.2 Hz);  $\delta_C$ (100 MHz; CDCl<sub>3</sub>) 14.2, 22.7, 23.7, 26.2, 28.9, 29.3, 29.5, 31.7, 32.8, 108.9, 118.1, 121.1, 125.5, 126.4, 126.7 ( $\times$  2), 126.8, 128.2, 129.4, 131.2, 133.4, 134.8, 135.6, 146.5, 170.6; HRMS (ES<sup>+</sup>, Ar) calcd for C<sub>27</sub>H<sub>31</sub>NO<sub>6</sub>SNa (MNa<sup>+</sup>) 520.1764, found 520.1760;  $[\alpha]_D^{25}$  +9.80 (c 1.0 in CHCl<sub>3</sub>); HPLC: Lux Cellulose-1 (pet ether/*i*-PrOH = 80/20, flow rate 1.0 mL/min,  $\lambda$  = 250 nm),  $t_R$  (major) = 16.5 min,  $t_R$  (minor) = 20.0 min; 92% ee.

**(S)-Naphthalen-1-yl 4-nitro-5-phenyl-4-(phenylsulfonyl)pentanoate (4f).** Colorless solid;

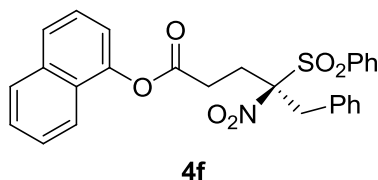

Yield 193 mg, 98%; mp 151-153 °C;  $\nu_{\max}$ (film)/cm<sup>-1</sup> 3063vw, 1761m, 1599vw, 1555m, 1448w, 1385w, 1332m, 1225w, 1150s, 1081w, 800w, 739m, 703w, 687w, 598w, 518vw;  $\delta_H$ (400 MHz; CDCl<sub>3</sub>) 2.79 (2H, ABqdd,  $J$  15.8, 10.0, 6.2 Hz), 3.18 (1H, ddd,  $J$  17.6, 10.0, 6.2 Hz), 3.33 (1H, ddd,  $J$  17.6, 10.0, 6.2 Hz), 3.52 (2H, ABq,  $J$  14.2 Hz), 7.03-7.11 (2H, m), 7.23 (1H, dd,  $J$  7.8, 0.8 Hz), 7.28-7.33 (3H, m), 7.45 (1H, t,  $J$  7.8 Hz), 7.49-7.55 (2H, m), 7.68 (2H, t,  $J$  8.1 Hz), 7.74 (1H, dd,  $J$  7.8, 0.8 Hz), 7.77-7.81 (1H, m), 7.81 (1H, tt overlap with m,  $J$  8.1, 1.0 Hz), 7.84-7.90 (1H, m), 8.06 (2H, dd,  $J$  8.1, 1.0 Hz);  $\delta_C$ (100 MHz; CDCl<sub>3</sub>) 26.7, 29.1, 41.5, 108.9, 118.1, 121.3, 125.5, 126.3, 126.6, 126.7, 126.8, 128.2, 128.8, 129.4 ( $\times$ 2), 130.0, 131.2, 131.7, 134.1, 134.8, 135.7, 146.6, 170.8; HRMS (ES<sup>+</sup>, Ar) calcd for C<sub>27</sub>H<sub>23</sub>NO<sub>6</sub>SNa (MNa<sup>+</sup>) 512.1138, found 512.1138;  $[\alpha]_D^{25}$  +30.02 (c 1.0 in CHCl<sub>3</sub>); HPLC: Lux Cellulose-1 (pet ether/*i*-PrOH = 80/20, flow rate 1.0 mL/min,  $\lambda$  = 250 nm),  $t_R$  (major) = 16.2 min,  $t_R$  (minor) = 23.6 min; 83% ee.

**(R)-4-Nitro-4-(phenylsulfonyl)-1-p-tolylpentan-1-one (6a).**<sup>7</sup> Colorless solid; Yield 179 mg,

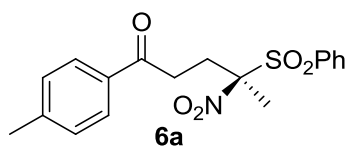

99%; mp 132-134 °C;  $\nu_{\max}$ (film)/cm<sup>-1</sup> 2921w, 1671s, 1608w, 1548vs, 1448w, 1439w, 1328m, 1310m, 1154s, 1073w, 982w, 790w;  $\delta_H$ (400 MHz; CDCl<sub>3</sub>) 1.99 (3H, s), 2.40 (3H, s), 2.78 (2H, ABqdd,  $J$  14.8, 9.1, 6.0), 3.01 (2H, ABqdd,  $J$  17.4, 9.1, 6.0), 7.25 (2H, d,  $J$  8.2), 7.62 (2H, t,  $J$  7.8), 7.77 (1H, tt,  $J$  7.8, 1.0), 7.80 (2H, d,  $J$  8.2), 7.90 (2H, dd,  $J$  7.8, 1.0);  $\delta_C$ (100 MHz; CDCl<sub>3</sub>) 17.6, 21.9, 28.5, 32.6, 106.7, 128.3, 129.4, 129.6, 131.3, 132.9, 133.7, 135.6, 144.8, 196.3; m/z (ES<sup>+</sup>, Ar) 364 ([MH+2]<sup>+</sup>, 9), 363 ([MH+1]<sup>+</sup>, 23), 362 (MH<sup>+</sup>, 100), 315 (12), 173 (7); HRMS (ES<sup>+</sup>, Ar) calcd for C<sub>18</sub>H<sub>20</sub>NO<sub>5</sub>S (MH<sup>+</sup>) 362.1062, found 362.1050;  $[\alpha]_D^{25}$  +28.3 (c 1.0 in CHCl<sub>3</sub>); HPLC: Lux Amylose-2 (pet

ether/*i*-PrOH = 95/5, flow rate 1.0 mL/min,  $\lambda$  = 250 nm),  $t_R$  (major) = 51.3 min,  $t_R$  (minor) = 45.3 min; 96% ee.

**(R)-*N*-Methoxy-*N*-methyl-4-nitro-4-(phenylsulfonyl)pentanamide (6c).** Colorless oil; Yield

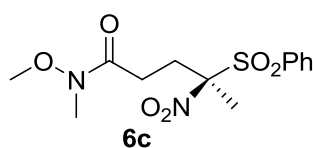

120 mg, 92%;  $\nu_{\max}$ (neat)/cm<sup>-1</sup> 2942m, 1661vs, 1554s, 1448s, 1387s, 1334vs, 1157vs, 1075m, 998m, 915m, 848w, 732m, 690m, 607m;  $\delta_H$ (500 MHz; CDCl<sub>3</sub>) 1.97 (3H, s), 2.41 (1H, ddd,  $J$  16.1, 10.2, 5.8 Hz), 2.53 (1H, ddd,  $J$  16.1, 10.2, 5.2 Hz), 2.63 (1H, ddd,  $J$  15.2, 10.2, 5.2 Hz), 2.71 (1H, ddd,  $J$  15.2, 10.2, 5.8 Hz), 3.16 (3H, s), 3.64 (3H, s), 7.61 (2H, t,  $J$  7.5 Hz), 7.76 (1H, tt,  $J$  7.5, 1.2 Hz), 7.89 (2H, dd,  $J$  7.5, 1.2 Hz);  $\delta_C$ (125 MHz; CDCl<sub>3</sub>) 17.1, 26.4, 29.0, 32.4, 61.5, 106.7, 129.4, 131.2, 132.8, 135.5, 171.5; HRMS (ES<sup>+</sup>, Ar) calcd for C<sub>13</sub>H<sub>18</sub>N<sub>2</sub>O<sub>6</sub>SK (MK<sup>+</sup>) 369.0517, found 369.0517;  $[\alpha]_D^{25}$  +6.16 (c 1.0, CHCl<sub>3</sub>); HPLC: Chiralpak AD-H (pet ether/*i*-PrOH = 70/30, flow rate 1.0 mL/min,  $\lambda$  = 212 nm),  $t_R$  (major) = 6.2 min,  $t_R$  (minor) = 9.0 min; 92% ee.

**(R)-*N*-Methyl-4-nitro-*N*-phenyl-4-(phenylsulfonyl)pentanamidepentanamide (6d).**

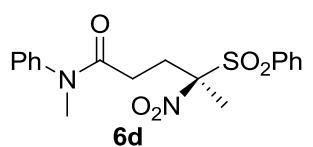

Colorless solid; mp 106-107 °C; Yield 80 mg, 53%;  $\nu_{\max}$ (flim)/cm<sup>-1</sup> 2947w, 1649m, 1597w, 1555m, 1497w, 1449w, 1395w, 1335m, 1157m, 1076w, 910s, 848vw, 735s, 651m, 607w;  $\delta_H$ (500 MHz; CDCl<sub>3</sub>) 1.81 (3H, s), 1.99 (1H, ddd,  $J$  15.7, 10.0, 5.7 Hz), 2.13 (1H, ddd,  $J$  15.7, 10.0, 5.7 Hz), 2.61 (2H, ABqdd,  $J$  14.9, 10.0, 5.7 Hz), 3.23 (3H, s), 7.11 (2H, d,  $J$  7.4 Hz), 7.35 (1H, t,  $J$  7.4 Hz), 7.40 (2H, t,  $J$  7.4 Hz), 7.60 (2H, t,  $J$  7.5 Hz), 7.75 (1H, tt,  $J$  7.5, 1.2 Hz), 7.84 (2H, dd,  $J$  7.5, 1.2 Hz);  $\delta_C$ (125 MHz; CDCl<sub>3</sub>) 16.8, 28.4, 29.9, 37.7, 106.7, 127.2, 128.5, 129.4, 130.3, 131.3, 132.8, 135.5, 143.3, 170.0; HRMS (ES<sup>+</sup>, Ar) calcd for C<sub>18</sub>H<sub>20</sub>N<sub>2</sub>O<sub>5</sub>SK (MK<sup>+</sup>) 415.0725, found 415.0723;  $[\alpha]_D^{25}$  -23.86 (c 1.0, CHCl<sub>3</sub>); HPLC: Chiralpak AD-H (pet ether/*i*-PrOH = 70/30, flow rate 1.0 mL/min,  $\lambda$  = 212 nm),  $t_R$  (major) = 9.6 min,  $t_R$  (minor) = 11.3 min; 96% ee.

**((R)-3-Nitro-3-(phenylsulfonyl)butylsulfonyl)benzene (6g).** Colorless solid; Yield 150 mg,

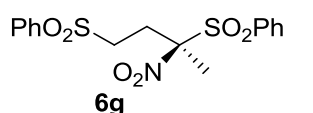

91%; mp 111-113 °C;  $\nu_{\max}$ (film)/cm<sup>-1</sup> 3061vw, 2928vw, 1556m, 1448w, 1386vw, 1327m, 1266m, 1152s, 1083w, 1075w, 738vs, 704m, 610w, 535w;  $\delta_H$ (400 MHz; DMSO-*d*<sub>6</sub>) 1.86 (3H, s), 2.42 (1H, ddd,  $J$  14.3, 12.0, 5.0 Hz), 2.62 (1H, ddd,  $J$  14.3, 12.0, 3.9 Hz), 3.36 (1H, ddd,  $J$  14.0, 12.0, 3.9 Hz), 3.65 (1H, ddd,  $J$  14.0, 12.0, 5.0 Hz), 7.68 (2H, t,  $J$  7.6 Hz), 7.73 (2H, t,  $J$  7.8 Hz), 7.75-7.81 (3H, m), 7.85-7.94 (3H, m);  $\delta_C$ (100 MHz; DMSO-*d*<sub>6</sub>) 16.6, 26.4, 49.1, 105.2, 127.9, 129.7, 129.9, 130.7, 131.1, 134.4, 136.3, 137.9; HRMS (ES<sup>+</sup>, Ar) calcd for C<sub>16</sub>H<sub>17</sub>NO<sub>6</sub>S<sub>2</sub>Na (MNa<sup>+</sup>) 406.0389, found 406.0387;  $[\alpha]_D^{25}$  -1.28 (c 1.0, CHCl<sub>3</sub>); HPLC: Chiralpak IA (pet ether/*i*-PrOH = 70/30, flow rate 1.0 mL/min,  $\lambda$  = 216 nm),  $t_R$  (major) = 40.0 min,  $t_R$  (minor) = 48.1 min; 10% ee.

**(R)-4-Nitro-4-(phenylsulfonyl)pentanenitrile (6h).** Colorless solid; mp 81-82 °C; Yield 55

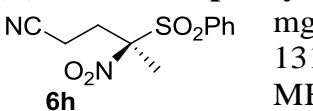

mg, 51%;  $\nu_{\max}$ (film)/cm<sup>-1</sup> 3067m, 2870w, 2248m, 1544vs, 1433m, 1330s, 1310vs, 1283s, 1153s, 1072w, 960m, 842m, 811w, 718w, 686w;  $\delta_H$ (500 MHz; CDCl<sub>3</sub>) 1.97 (3H, s), 2.61 (2H, ABqdd,  $J$  16.9, 9.0, 6.5 Hz), 2.68 (1H, ddd,  $J$  15.0, 9.0, 6.5 Hz), 2.86 (1H, ddd,  $J$  15.0, 9.0, 6.5 Hz), 7.64 (2H, t,  $J$  8.0 Hz), 7.80 (1H, tt,  $J$  8.0, 1.2 Hz), 7.85 (2H, dd,  $J$  8.0, 1.2 Hz);  $\delta_C$ (125 MHz; CDCl<sub>3</sub>) 12.7, 17.9, 29.4, 105.0, 117.5, 129.7, 131.2, 132.0, 136.0; HRMS (ES<sup>+</sup>, Ar) calcd for C<sub>11</sub>H<sub>12</sub>N<sub>2</sub>O<sub>4</sub>SNa (MNa<sup>+</sup>) 291.0410, found 291.0404;  $[\alpha]_D^{25}$  +2.77 (c 1.0, CHCl<sub>3</sub>); HPLC: Chiralcel OD-H (pet ether/*i*-PrOH = 70/30, flow rate 1.0 mL/min,  $\lambda$  = 216 nm),  $t_R$  (major) = 19.5 min,  $t_R$  (minor) = 17.5 min; 14% ee.

**(S)-4-Nitro-4-(phenylsulfonyl)hept-6-enoic acid (7).** To a solution of **4b** (220 mg, 0.50 mmol) in THF (5.0 ml) and H<sub>2</sub>O (5.0 ml) was added LiOH·H<sub>2</sub>O (42 mg, 1.0 mmol) and the mixture was stirred at room temperature for 15 min. The mixture was acidified with 1 N HCl and extracted with Et<sub>2</sub>O (3 × 15 ml). The combined extract was dried over anhydrous sodium sulfate. The organic layer was concentrated in vacuo and the residue was purified by silica gel column chromatography using EtOAc-pet ether (90%) as eluent to afford the acid **7**. Red oil; Yield 141 mg, 90%;  $\nu_{\max}(\text{neat})/\text{cm}^{-1}$  3069brs, 2987brs, 1716vs, 1582m, 1554vs, 1441s, 1334vs, 1315s, 1230vw, 1151vs, 1082m, 999w, 937m, 854w, 758w, 721w, 688w, 608m, 565w, 545w;  $\delta_{\text{H}}(400 \text{ MHz}; \text{CDCl}_3)$  2.57-2.69 (2H, m), 2.77-2.96 (2H, m), 2.98-3.12 (2H, m), 5.27 (1H, dd,  $J$  16.8, 1.2 Hz), 5.30 (1H, dd,  $J$  10.1 1.2 Hz), 5.67 (1H, ddt,  $J$  16.8, 10.1, 7.0 Hz), 7.62 (2H, t,  $J$  7.9 Hz), 7.78 (1H, tt,  $J$  7.9, 1.2 Hz), 7.88 (2H, dd,  $J$  7.9, 1.2 Hz);  $\delta_{\text{C}}(100 \text{ MHz}; \text{CDCl}_3)$  26.0, 28.5, 36.9, 107.8, 123.0, 128.2, 129.5, 131.2, 133.1, 135.7, 177.4; HRMS (ES<sup>+</sup>, Ar) calcd for C<sub>13</sub>H<sub>15</sub>NO<sub>6</sub>SNa (MNa<sup>+</sup>) 336.0512, found 336.0514;  $[\alpha]_{\text{D}}^{25} +25.00$  (c 1.0 in CHCl<sub>3</sub>).

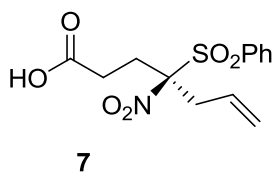

**(S)-N-hydroxy-4-nitro-4-(phenylsulfonyl)hept-6-enamide (8).** To a solution of **4b** (317 mg, 0.72 mmol) in EtOH-DCM (10.5:4.5, 15.0 ml) was added HONH<sub>2</sub>·HCl (187 mg, 2.89 mmol) and pyridine (233  $\mu$ l, 2.89 mmol) and the mixture was stirred at room temperature for 12 h. The mixture was evaporated in vacuo and the residue was purified by silica gel column chromatography using EtOAc-pet ether (60:40) as eluent to afford pure amide **8**. Colorless sticky liquid; Yield 194 mg, 82%;  $\nu_{\max}(\text{neat})/\text{cm}^{-1}$  3235brvs, 1662vs, 1583m, 1554s, 1448m, 1332s, 1315s, 1268m, 1150vs, 1081m, 999m, 937m, 894w, 853m, 757m, 739m, 689m, 607m, 543m;  $\delta_{\text{H}}(500 \text{ MHz}; \text{CDCl}_3)$  2.40-2.52 (1H, m), 2.61-2.74 (2H, m), 2.81-2.90 (1H, m), 2.97, 3.05 (2H, ABqd,  $J$  15.0, 7.1 Hz), 5.22 (1H, d,  $J$  15.1 Hz), 5.23 (1H, d,  $J$  12.3 Hz), 5.60-5.70 (1H, m), 7.61 (2H, t,  $J$  7.6 Hz), 7.76 (1H, t,  $J$  7.6 Hz), 7.88 (2H, d,  $J$  7.6 Hz);  $\delta_{\text{C}}(125 \text{ MHz}; \text{CDCl}_3)$  26.7, 27.3, 36.8, 108.4, 123.1, 128.0, 129.5, 131.2, 133.1, 135.7, 169.8; HRMS (ES<sup>+</sup>, Ar) calcd for C<sub>13</sub>H<sub>16</sub>N<sub>2</sub>O<sub>6</sub>SNa (MNa<sup>+</sup>) 351.0621, found 351.0626;  $[\alpha]_{\text{D}}^{25} +26.19$  (c 1.0 in CHCl<sub>3</sub>); HPLC: Chiralpak IC (pet ether/*i*-PrOH = 70/30, flow rate 1.0 mL/min,  $\lambda = 216 \text{ nm}$ ),  $t_{\text{R}}$  (major) = 11.4 min,  $t_{\text{R}}$  (minor) = 13.5 min; 94% ee.

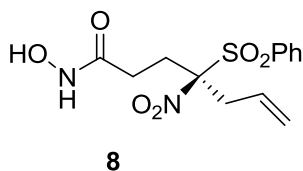

## References

- (a) Reference 31, main text; (b) **C2**: B. Vakulya, S. Varga, A. Csampai and T. Soos, *Org. Lett.*, 2005, **7**, 1967; (c) **C3**: T.-Y. Liu, J. Long, B.-J. Li, L. Jiang, R. Li, Y. Wu, L.-S. Ding and Y.-C. Chen, *Org. Biomol. Chem.*, 2006, **4**, 2097; (d) **C4**: J. Ye, D. J. Dixon and P. S. Hynes, *Chem. Commun.*, 2005, 4481; (e) **C5**: reference 9d, main text; (f) **C6-C8**: reference 8b, main text;
- C9**: Reference 32, main text.
- (a) Reference 29, main text; (b) P. A. Wade, H. R. Hinney, N. V. Amin, P. D. Vail, S. D. Morrow, S. A. Hardinger and M. S. Saft, *J. Org. Chem.*, 1981, **46**, 765.
- (a) **1a**, **1c-f**, **1h** and **1j**: T. S. Pham, K. Gönczi, G. Kardos, K. Süle, L. Hegedus, M. Kállay, M. Kubinyi, P. Szabó, I. Petneházy, L. Toke and Z. Jászay, *Tetrahedron: Asymmetry*, 2013, **24**, 1605. (b) **1b**: P. S. Vijayanand, R. Arunprasath, R. Balaji and S. Nanjundan, *J. Appl. Polym. Sci.*, 2002, **85**, 2261; (c) **1g**: H. S.-I. Chao, T. W. Hovatter, B. C. Johnson and S. T.

Rice, *J. Polym. Sci. Pol. Chem.*, 1989, **27**, 3371; (d) **1i**: B. Muckensturm and F. Diyani, *J. Chem. Research, Synop.*, 1995, **11**, 442; (e) **1k**: D. R. Fahey and J. E. Mahan, *J. Mol. Catal.*, 1977, **3**, 447. (f) **1l**: L. Cao, M. Bei and L. Hua, *Fenzi Cuihua*, 1991, **5**, 296; (g) **1m-n**: C. L. Rigby and D. J. Dixon, *Chem. Commun.*, 2008, 37981.

5. (a) Amide **5c**: V. Pace, L. Castoldi, A. R. Alcántarab and W. Holzer, *RSC Advances*, 2013, **3**, 10158; (b) Amide **5d**: T. Inokuma, Y. Suzuki, T. Sakaeda and Y. Takemoto, *Chem. Asian J.*, 2011, **6**, 2902; (c) Amide **5e**: M. A. Hassan and A. B. Shehata, *J. Appl. Polym. Sci.*, 2002, **85**, 2808.

6. Enone **5a**: L. A. Batory, C. E. McInnis and J. T. Njardarson, *J. Am. Chem. Soc.*, 2006, **128**, 16054.

7. Reference 29, main text.
