# Supplementary material for: Enantioselective synthesis of γ-tetrasubstituted nitrosulfonyl carboxylates and amides vial-tert-leucine-derived-squaramide catalyzed conjugate addition of nitrosulfones to acrylates and acrylamides
Source: Royal Society of Chemistry journal article supplement (doi:10.1039/c4ob00344f), 2014-01-01
Supplement: c4ob00344f2.pdf [file c4ob00344f2.pdf]

NMR Spectra and HPLC Profiles  
for

**Enantioselective Synthesis of  $\gamma$ -Tetrasubstituted  $\gamma$ -Nitro- $\gamma$ -sulfonyl Carboxylates and Amides *via* L-*tert*-Leucine-Derived-Squaramide Catalyzed Conjugate Addition of  $\alpha$ -Nitrosulfones to Acrylates and Acrylamides**

**Kalisankar Bera and Irishi N. N. Namboothiri\***

*Department of Chemistry, Indian Institute of Technology Bombay, Mumbai 400 076, India, irishi@iitb.ac.in*

Table of Contents

|    |                                                       |    |
|----|-------------------------------------------------------|----|
| 1  | Figure S1. $^1\text{H}$ NMR Spectrum of <b>C10</b>    | 5  |
| 2  | Figure S2. $^{13}\text{C}$ NMR Spectrum of <b>C10</b> | 6  |
| 3  | Figure S3. $^1\text{H}$ NMR Spectrum of <b>C11</b>    | 7  |
| 4  | Figure S4. $^{13}\text{C}$ NMR Spectrum of <b>C11</b> | 8  |
| 5  | Figure S5. $^1\text{H}$ NMR Spectrum of <b>C12</b>    | 9  |
| 6  | Figure S6. $^{13}\text{C}$ NMR Spectrum of <b>C12</b> | 10 |
| 7  | Figure S7. $^1\text{H}$ NMR Spectrum of <b>3a</b>     | 11 |
| 8  | Figure S8. $^{13}\text{C}$ NMR Spectrum of <b>3a</b>  | 12 |
| 9  | Figure S9. HPLC Profile of Racemic <b>3a</b>          | 13 |
| 10 | Figure S10. HPLC Profile of Enantioenriched <b>3a</b> | 14 |
| 11 | Figure S11. $^1\text{H}$ NMR Spectrum of <b>3b</b>    | 15 |
| 12 | Figure S12. $^{13}\text{C}$ NMR Spectrum of <b>3b</b> | 16 |
| 13 | Figure S13. HPLC Profile of Racemic <b>3b</b>         | 17 |
| 14 | Figure S14. HPLC Profile of Enantioenriched <b>3b</b> | 18 |
| 15 | Figure S15. $^1\text{H}$ NMR Spectrum of <b>3c</b>    | 19 |
| 16 | Figure S16. $^{13}\text{C}$ NMR Spectrum of <b>3c</b> | 20 |
| 17 | Figure S17. HPLC Profile of Racemic <b>3c</b>         | 21 |
| 18 | Figure S18. HPLC Profile of Enantioenriched <b>3c</b> | 22 |
| 19 | Figure S19. $^1\text{H}$ NMR Spectrum of <b>3d</b>    | 23 |
| 20 | Figure S20. $^{13}\text{C}$ NMR Spectrum of <b>3d</b> | 24 |
| 21 | Figure S21. HPLC Profile of Racemic <b>3d</b>         | 25 |
| 22 | Figure S22. HPLC Profile of Enantioenriched <b>3d</b> | 26 |
| 23 | Figure S23. $^1\text{H}$ NMR Spectrum of <b>3e</b>    | 27 |

|    |                                                                                    |    |
|----|------------------------------------------------------------------------------------|----|
| 24 | Figure S24. <sup>13</sup> C NMR Spectrum of <b>3e</b>                              | 28 |
| 25 | Figure S25. HPLC Profile of Racemic <b>3e</b>                                      | 29 |
| 26 | Figure S26. HPLC Profile of Enantioenriched <b>3e</b>                              | 30 |
| 27 | Figure S27. <sup>1</sup> H NMR Spectrum of <b>3f</b>                               | 31 |
| 28 | Figure S28. <sup>13</sup> C NMR Spectrum of <b>3f</b>                              | 32 |
| 29 | Figure S29. HPLC Profile of Racemic <b>3f</b>                                      | 33 |
| 30 | Figure S30. HPLC Profile of Enantioenriched <b>3f</b>                              | 34 |
| 31 | Figure S31. <sup>1</sup> H NMR Spectrum of <b>3g</b>                               | 35 |
| 32 | Figure S32. <sup>13</sup> C NMR Spectrum of <b>3g</b>                              | 36 |
| 33 | Figure S33. <sup>19</sup> F NMR Spectrum of <b>3g</b>                              | 37 |
| 34 | Figure S34. HPLC Profile of Racemic <b>3g</b>                                      | 38 |
| 35 | Figure S35. HPLC Profile of Enantioenriched <b>3g</b>                              | 39 |
| 36 | Figure S36. <sup>1</sup> H NMR Spectrum of <b>3h</b>                               | 40 |
| 37 | Figure S37. <sup>13</sup> C NMR Spectrum of <b>3h</b>                              | 41 |
| 38 | Figure S38. HPLC Profile of Racemic <b>3h</b>                                      | 42 |
| 39 | Figure S39. HPLC Profile of Enantioenriched <b>3h</b>                              | 43 |
| 40 | Figure S40. <sup>1</sup> H NMR Spectrum of <b>3i</b>                               | 44 |
| 41 | Figure S41. <sup>13</sup> C NMR Spectrum of <b>3i</b>                              | 45 |
| 42 | Figure S42. HPLC Profile of Racemic <b>3i</b>                                      | 46 |
| 43 | Figure S43. HPLC Profile of Enantioenriched <b>3i</b>                              | 47 |
| 44 | Figure S44. <sup>1</sup> H NMR Spectrum of <b>3j</b>                               | 48 |
| 45 | Figure S45. <sup>13</sup> C NMR Spectrum of <b>3j</b>                              | 49 |
| 46 | Figure S46. HPLC Profile of Racemic <b>3j</b>                                      | 50 |
| 47 | Figure S47. HPLC Profile of Enantioenriched <b>3j</b>                              | 51 |
| 48 | Figure S48. <sup>1</sup> H NMR Spectrum of <b>3k</b>                               | 52 |
| 49 | Figure S49. <sup>13</sup> C NMR Spectrum of <b>3k</b>                              | 53 |
| 50 | Figure S50. HPLC Profile of Racemic <b>3k</b>                                      | 54 |
| 51 | Figure S51. HPLC Profile of Enantioenriched <b>3k</b>                              | 55 |
| 52 | Figure S52. <sup>1</sup> H NMR Spectrum of <b>3l</b>                               | 56 |
| 53 | Figure S53. <sup>13</sup> C NMR Spectrum of <b>3l</b>                              | 57 |
| 54 | Figure S54. HPLC Profile of Racemic <b>3l</b>                                      | 58 |
| 55 | Figure S55. HPLC Profile of Enantioenriched <b>3l</b>                              | 59 |
| 56 | Figure S56. <sup>1</sup> H NMR Spectrum of <b>3m</b>                               | 60 |
| 57 | Figure S57. <sup>13</sup> C NMR Spectrum of <b>3m</b>                              | 61 |
| 58 | Figure S58. <sup>1</sup> H- <sup>1</sup> H COSY NMR Spectrum of <b>3m</b>          | 62 |
| 59 | Figure S59. Expanded <sup>1</sup> H- <sup>1</sup> H COSY NMR Spectrum of <b>3m</b> | 63 |
| 60 | Figure S60. HPLC Profile of Racemic <b>3m</b>                                      | 64 |
| 61 | Figure S61. HPLC Profile of Enantioenriched <b>3m</b>                              | 65 |

|    |                                                                                    |     |
|----|------------------------------------------------------------------------------------|-----|
| 62 | Figure S62. <sup>1</sup> H NMR Spectrum of <b>3n</b>                               | 66  |
| 63 | Figure S63. <sup>13</sup> C NMR Spectrum of <b>3n</b>                              | 67  |
| 64 | Figure S64. HPLC Profile of Racemic <b>3n</b>                                      | 68  |
| 65 | Figure S65. HPLC Profile of Enantioenriched <b>3n</b>                              | 69  |
| 66 | Figure S66. <sup>1</sup> H NMR Spectrum of <b>3o</b>                               | 70  |
| 67 | Figure S67. <sup>13</sup> C NMR Spectrum of <b>3o</b>                              | 71  |
| 68 | Figure S68. HPLC Profile of Racemic <b>3o</b>                                      | 72  |
| 69 | Figure S69. HPLC Profile of Enantioenriched <b>3o</b>                              | 73  |
| 70 | Figure S70. <sup>1</sup> H NMR Spectrum of <b>3p</b>                               | 74  |
| 71 | Figure S71. <sup>13</sup> C NMR Spectrum of <b>3p</b>                              | 75  |
| 72 | Figure S72. HPLC Profile of Racemic <b>3p</b>                                      | 76  |
| 73 | Figure S73. HPLC Profile of Enantioenriched <b>3p</b>                              | 77  |
| 74 | Figure S74. <sup>1</sup> H NMR Spectrum of <b>4a</b>                               | 78  |
| 75 | Figure S75. <sup>13</sup> C NMR Spectrum of <b>4a</b>                              | 79  |
| 76 | Figure S76. HPLC Profile of Racemic <b>4a</b>                                      | 80  |
| 77 | Figure S77. HPLC Profile of Enantioenriched <b>4a</b>                              | 81  |
| 78 | Figure S78. <sup>1</sup> H NMR Spectrum of <b>4b</b>                               | 82  |
| 79 | Figure S79. <sup>13</sup> C NMR Spectrum of <b>4b</b>                              | 83  |
| 80 | Figure S80. HPLC Profile of Racemic <b>4b</b>                                      | 84  |
| 81 | Figure S81. HPLC Profile of Enantioenriched <b>4b</b>                              | 85  |
| 82 | Figure S82. <sup>1</sup> H NMR Spectrum of <b>4c</b>                               | 86  |
| 83 | Figure S83. <sup>13</sup> C NMR Spectrum of <b>4c</b>                              | 87  |
| 84 | Figure S84. <sup>1</sup> H- <sup>1</sup> H COSY NMR Spectrum of <b>4c</b>          | 88  |
| 85 | Figure S85. Expanded <sup>1</sup> H- <sup>1</sup> H COSY NMR Spectrum of <b>4c</b> | 89  |
| 86 | Figure S86. HPLC Profile of Racemic <b>4c</b>                                      | 90  |
| 87 | Figure S87. HPLC Profile of Enantioenriched <b>4c</b>                              | 91  |
| 88 | Figure S88. <sup>1</sup> H NMR Spectrum of <b>4d</b>                               | 92  |
| 89 | Figure S89. <sup>13</sup> C NMR Spectrum of <b>4d</b>                              | 93  |
| 90 | Figure S90. HPLC Profile of Racemic <b>4d</b>                                      | 94  |
| 91 | Figure S91. HPLC Profile of Enantioenriched <b>4d</b>                              | 95  |
| 92 | Figure S92. <sup>1</sup> H NMR Spectrum of <b>4e</b>                               | 96  |
| 93 | Figure S93. <sup>13</sup> C NMR Spectrum of <b>4e</b>                              | 97  |
| 94 | Figure S94. HPLC Profile of Racemic <b>4e</b>                                      | 98  |
| 95 | Figure S95. HPLC Profile of Enantioenriched <b>4e</b>                              | 99  |
| 96 | Figure S96. <sup>1</sup> H NMR Spectrum of <b>4f</b>                               | 100 |
| 97 | Figure S97. <sup>13</sup> C NMR Spectrum of <b>4f</b>                              | 101 |
| 98 | Figure S98. HPLC Profile of Racemic <b>4f</b>                                      | 102 |
| 99 | Figure S99. HPLC Profile of Enantioenriched <b>4f</b>                              | 103 |

|     |                                                        |     |
|-----|--------------------------------------------------------|-----|
| 100 | Figure S100. <sup>1</sup> H NMR Spectrum of <b>6a</b>  | 104 |
| 101 | Figure S101. <sup>13</sup> C NMR Spectrum of <b>6a</b> | 105 |
| 102 | Figure S102. HPLC Profile of Racemic <b>6a</b>         | 106 |
| 103 | Figure S103. HPLC Profile of Enantioenriched <b>6a</b> | 107 |
| 104 | Figure S104. <sup>1</sup> H NMR Spectrum of <b>6c</b>  | 108 |
| 105 | Figure S105. <sup>13</sup> C NMR Spectrum of <b>6c</b> | 109 |
| 106 | Figure S106. HPLC Profile of Racemic <b>6c</b>         | 110 |
| 107 | Figure S107. HPLC Profile of Enantioenriched <b>6c</b> | 111 |
| 108 | Figure S108. <sup>1</sup> H NMR Spectrum of <b>6d</b>  | 112 |
| 109 | Figure S109. <sup>13</sup> C NMR Spectrum of <b>6d</b> | 113 |
| 110 | Figure S110. HPLC Profile of Racemic <b>6d</b>         | 114 |
| 111 | Figure S111. HPLC Profile of Enantioenriched <b>6d</b> | 115 |
| 112 | Figure S112. <sup>1</sup> H NMR Spectrum of <b>6g</b>  | 116 |
| 113 | Figure S113. <sup>13</sup> C NMR Spectrum of <b>6g</b> | 117 |
| 114 | Figure S114. HPLC Profile of Racemic <b>6g</b>         | 118 |
| 115 | Figure S115. HPLC Profile of Enantioenriched <b>6g</b> | 119 |
| 116 | Figure S116. <sup>1</sup> H NMR Spectrum of <b>6h</b>  | 120 |
| 117 | Figure S117. <sup>13</sup> C NMR Spectrum of <b>6h</b> | 121 |
| 118 | Figure S118. HPLC Profile of Racemic <b>6h</b>         | 122 |
| 119 | Figure S119. HPLC Profile of Enantioenriched <b>6h</b> | 123 |
| 120 | Figure S120. <sup>1</sup> H NMR Spectrum of <b>7</b>   | 124 |
| 121 | Figure S121. <sup>13</sup> C NMR Spectrum of <b>7</b>  | 125 |
| 122 | Figure S122. <sup>1</sup> H NMR Spectrum of <b>8</b>   | 126 |
| 123 | Figure S123. <sup>13</sup> C NMR Spectrum of <b>8</b>  | 127 |
| 124 | Figure S124. HPLC Profile of Racemic <b>8</b>          | 128 |
| 125 | Figure S125. HPLC Profile of Enantioenriched <b>8</b>  | 129 |

NAME INN-4-KSB-46B-1H  
EXPNO 10  
PROCNO 1  
Date 20130422  
Time 11.17  
INSTRUM spect  
PROBHD 5 mm PABBO BB-  
PULPROG zg30  
TD 49340  
SOLVENT DMSO  
NS 13  
DS 0  
SWH 8223.685 Hz  
FIDRES 0.166674 Hz  
AQ 2.9999220 sec  
RG 32  
DW 60.800 usec  
DE 6.50 usec  
TE 294.5 K  
D1 1.00000000 sec  
TDO 1

INN-4-KSB-46B-1H

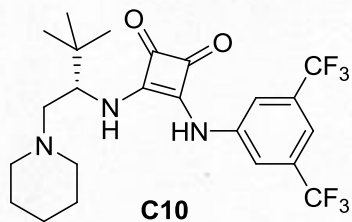

----- CHANNEL f1 -----  
NUC1 1H  
P1 13.50 usec  
PL1 -1.00 dB  
PL1W 10.56200695 W  
SFO1 400.1324710 MHz  
SI 32768  
SF 400.1300364 MHz  
WDW EM  
SSB 0  
LB 0.00 Hz  
GB 0  
PC 1.00

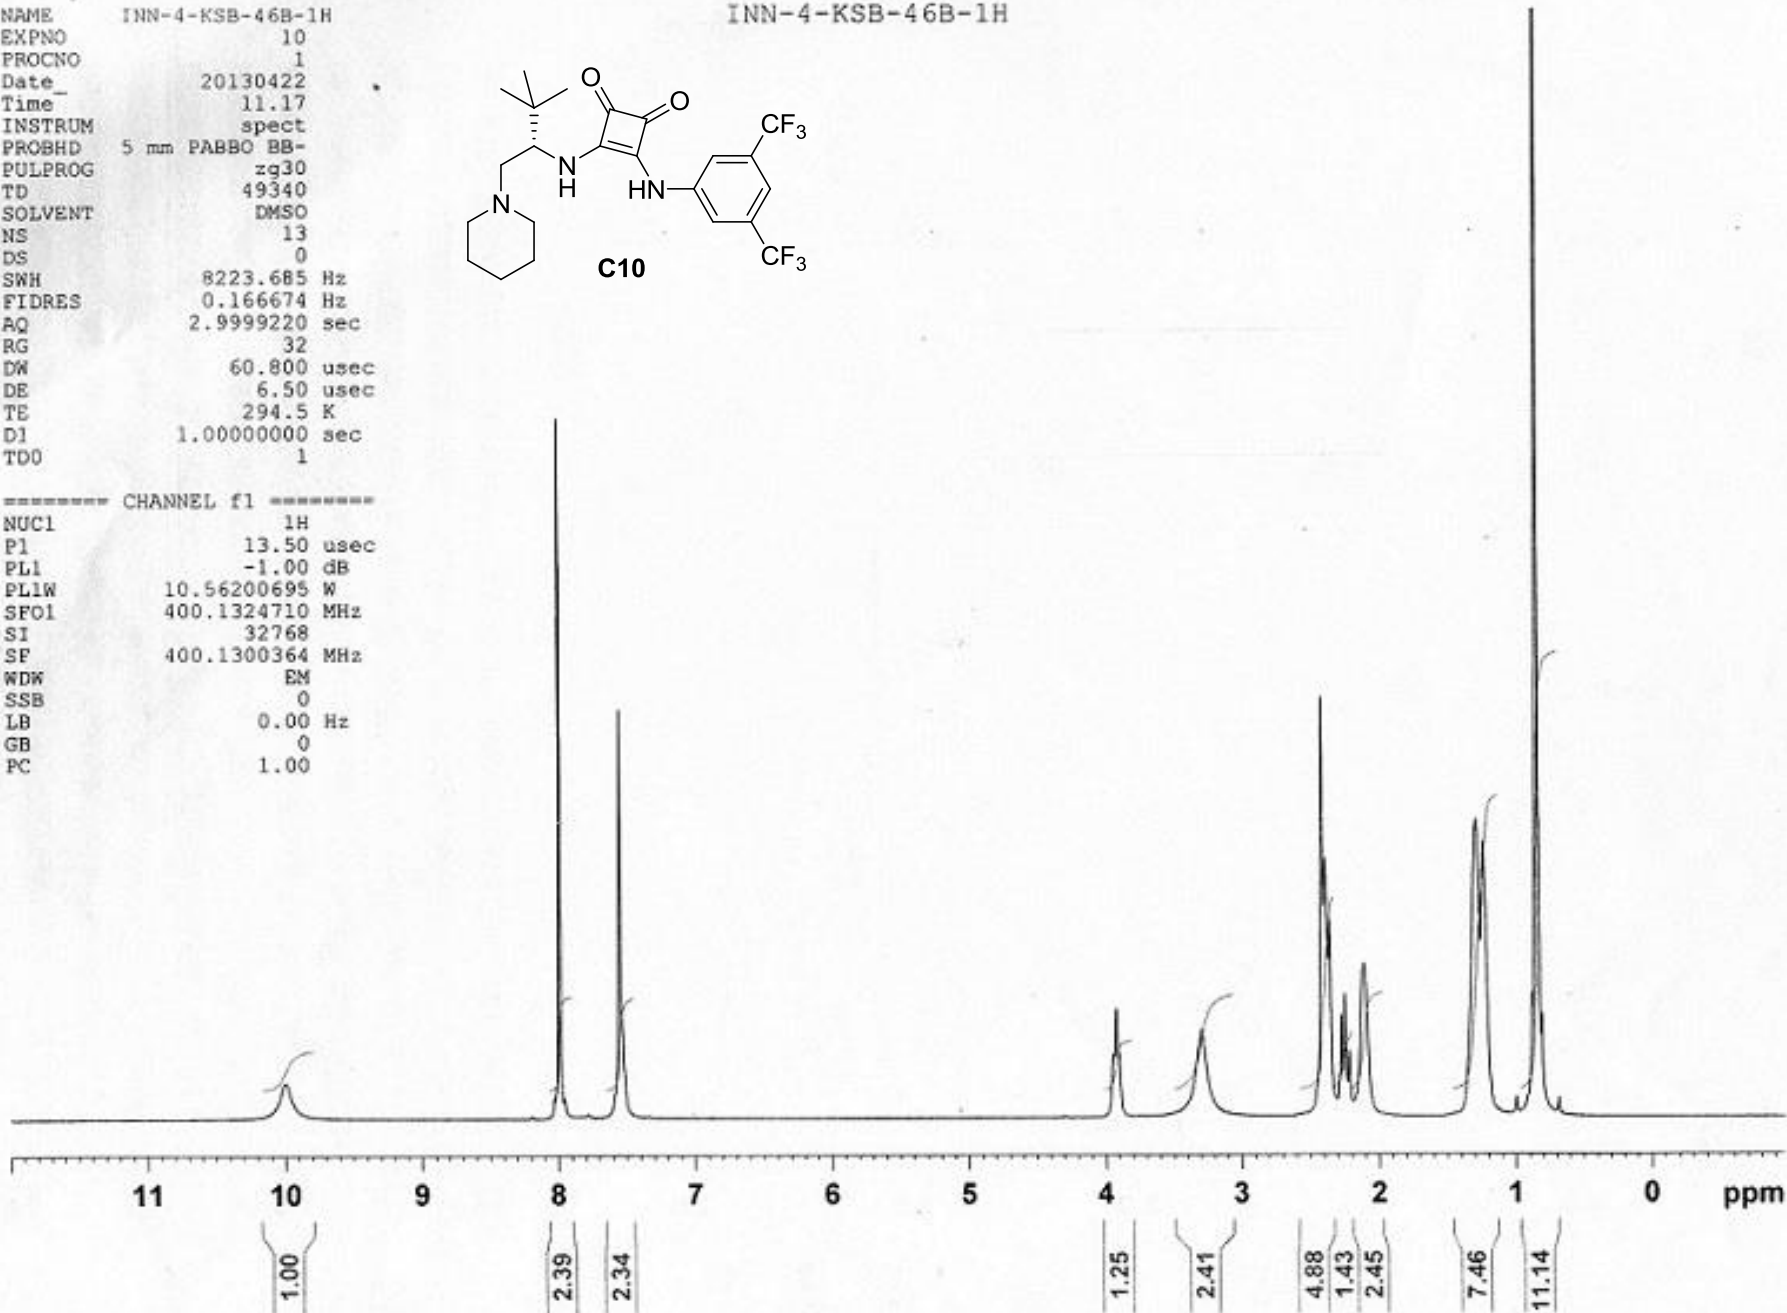

Fig S1. <sup>1</sup>H NMR Spectrum of C10

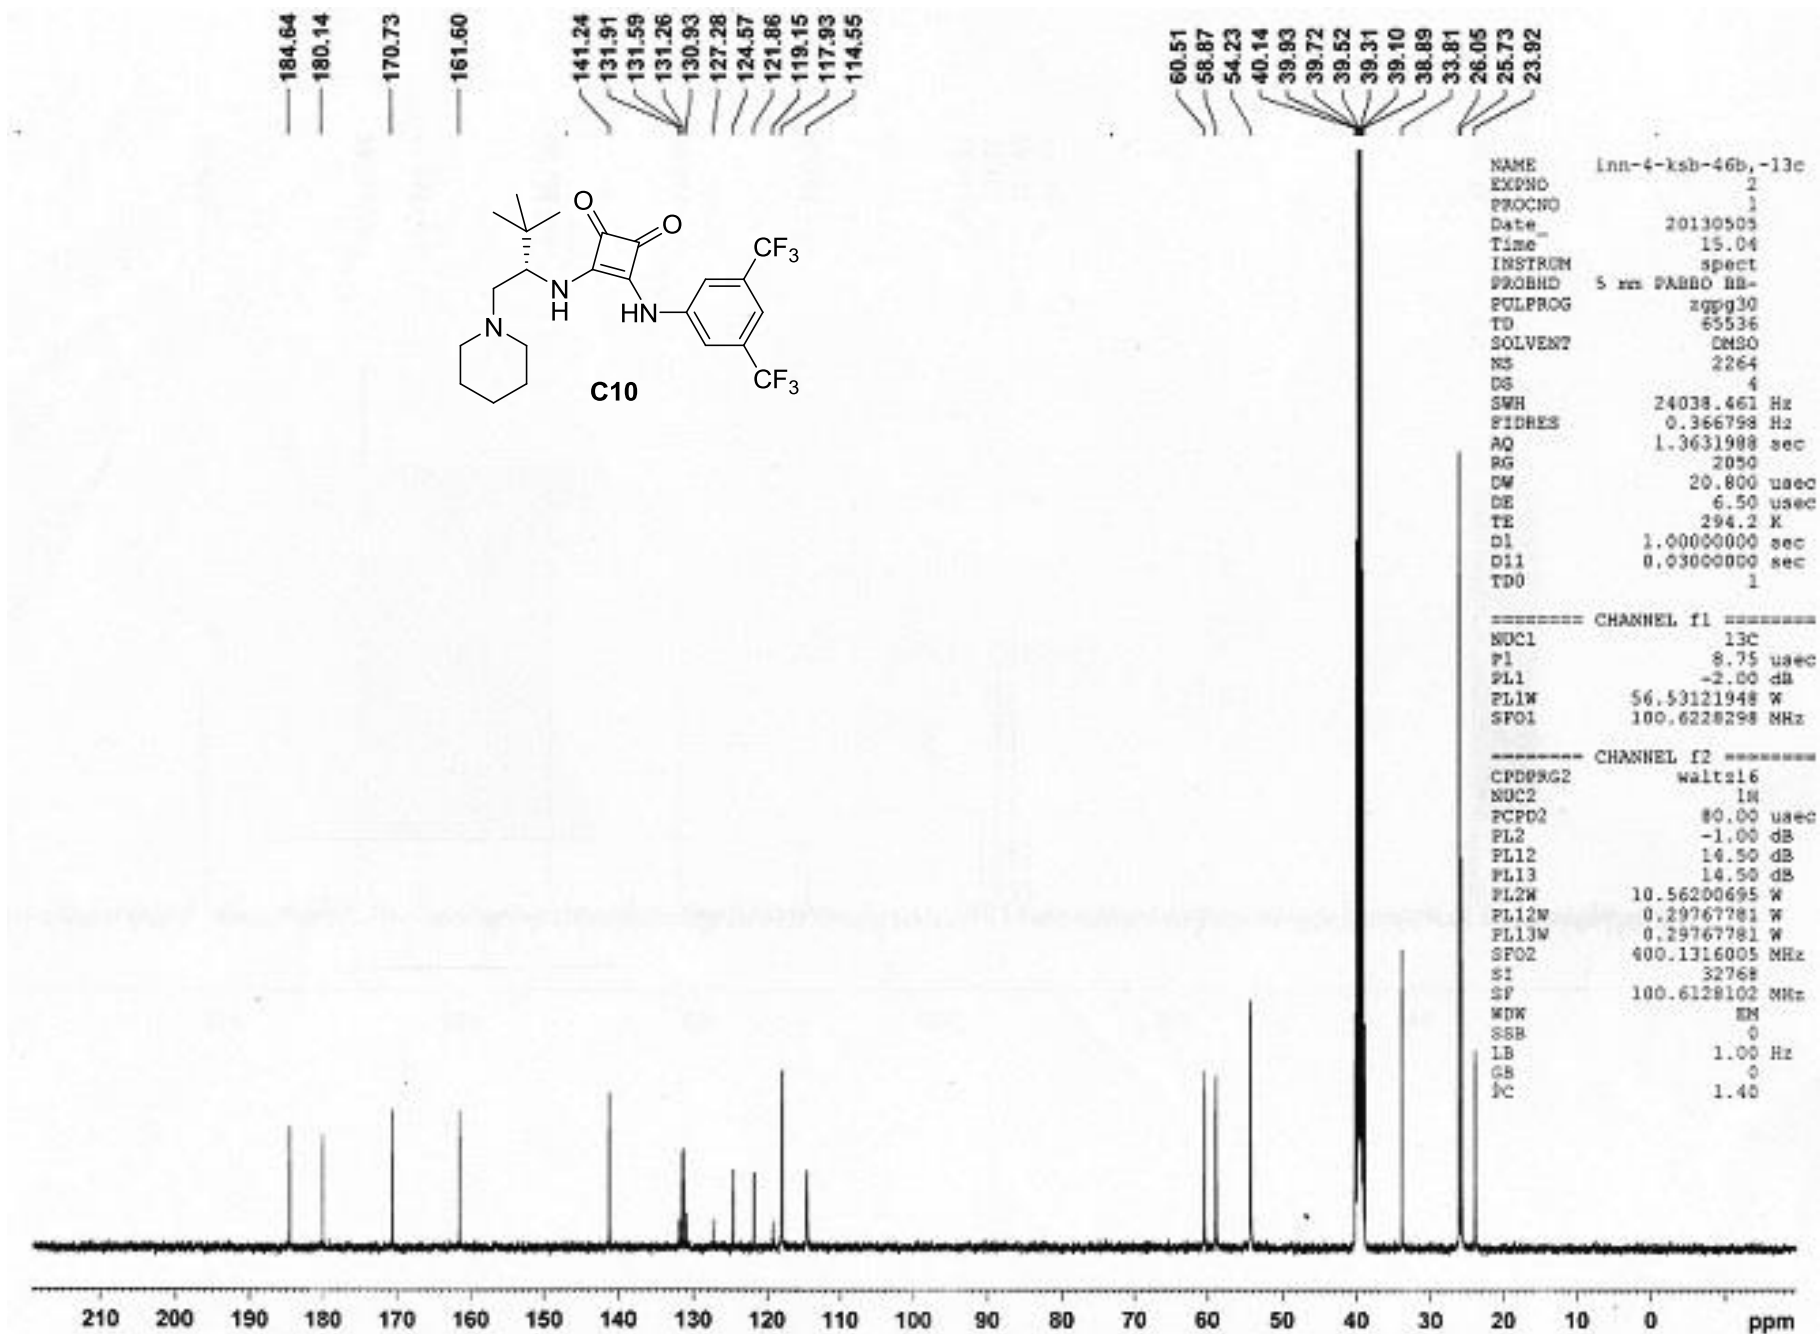

Fig S2. <sup>13</sup>C NMR Spectrum of C10

NAME INN-4-KSB-98C-1H  
 EXPNO 7  
 PROCNO 1  
 Date\_ 20130728  
 Time\_ 19.38  
 INSTRUM spect  
 PROBHD 5 mm PABBO BB-  
 PULPROG zg30  
 TD 65536  
 SOLVENT DMSO  
 NS 8  
 DS 0  
 SWH 8223.685 Hz  
 FIDRES 0.125483 Hz  
 AQ 3.9846387 sec  
 RG 32  
 DW 60.800 usec  
 DE 6.50 usec  
 TE 295.7 K  
 D1 1.00000000 sec  
 TDO 1

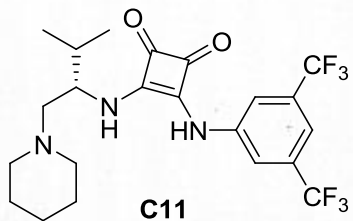

===== CHANNEL f1 =====  
 NUC1 1H  
 P1 13.50 usec  
 PL1 -1.00 dB  
 PL1W 10.56200695 W  
 SFOL 400.1324710 MHz  
 SI 32768  
 SF 400.1300095 MHz  
 WDW EM  
 SSB 0  
 LB 0.30 Hz  
 GB 0  
 PC 1.00

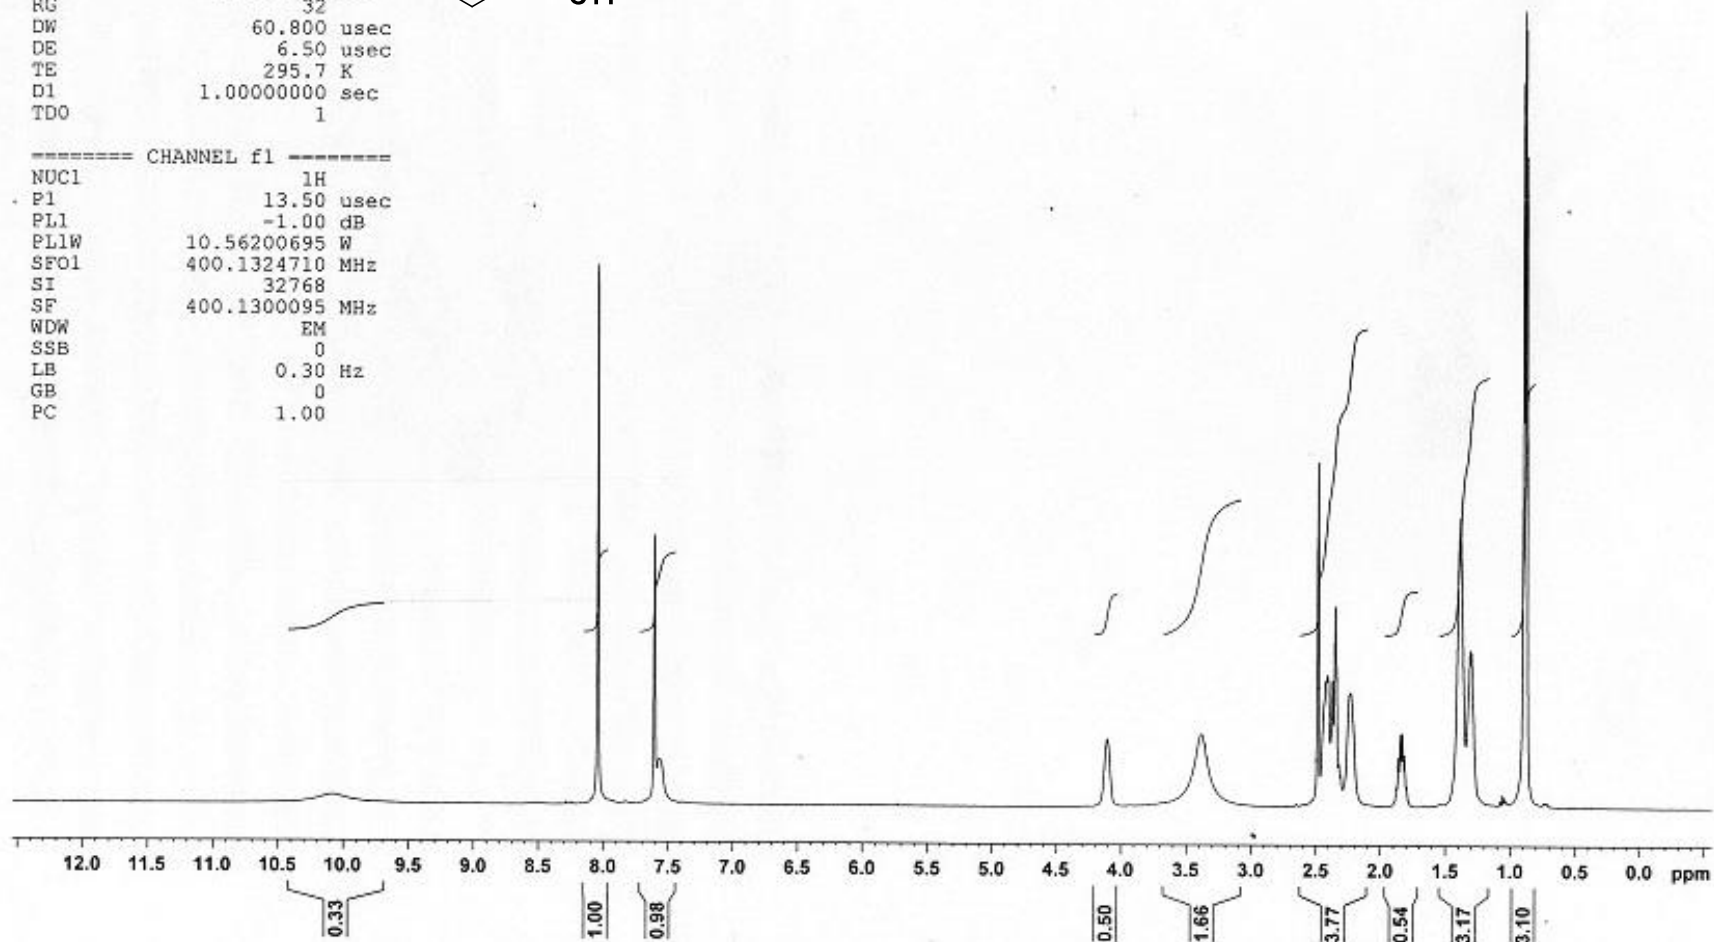

Fig S3. <sup>1</sup>H NMR Spectrum of C11

```

NAME      INN-4-K58-98C-13C
EXPNO    3
PROCNO   1
Date_    20130811
Time     21.58
INSTRUM  spect
PROBHD   5 mm FAREO BB-
PULPROG  zgpg30
TD       65536
SOLVENT  DM80
NS       874
DS       4
SWH      24038.461 Hz
FIDRES   0.366798 Hz
AQ       1.3031988 sec
RG       2050
CN       20.900 usec
DC       0.50 usec
TE       295.2 K
DL       1.0000000 sec
D11      0.0300000 sec
T00      1

```

```

***** CHANNEL f1 *****
NUC1      13C
P1        8.75 usec
PL1       -2.00 dB
PL1W      56.51121948 W
SFO1      100.6228298 MHz

```

```

***** CHANNEL f2 *****
CPDPRG2  waltz16
NUC2      1H
PCPO2     80.00 usec
PL2       -1.00 dB
PL12      14.50 dB
PL13      14.50 dB
PL2W      10.58200895 W
PL12W     0.29767781 W
PL13W     0.29767781 W
SFO2      400.1316005 MHz
SI        32768
SF        100.6127973 MHz
WDW       EM
SSB       0
LB        1.00 Hz
GB        0
PC        1.40

```

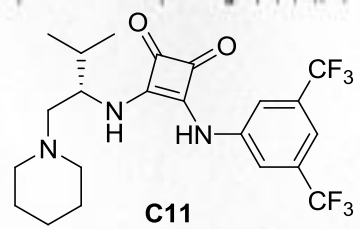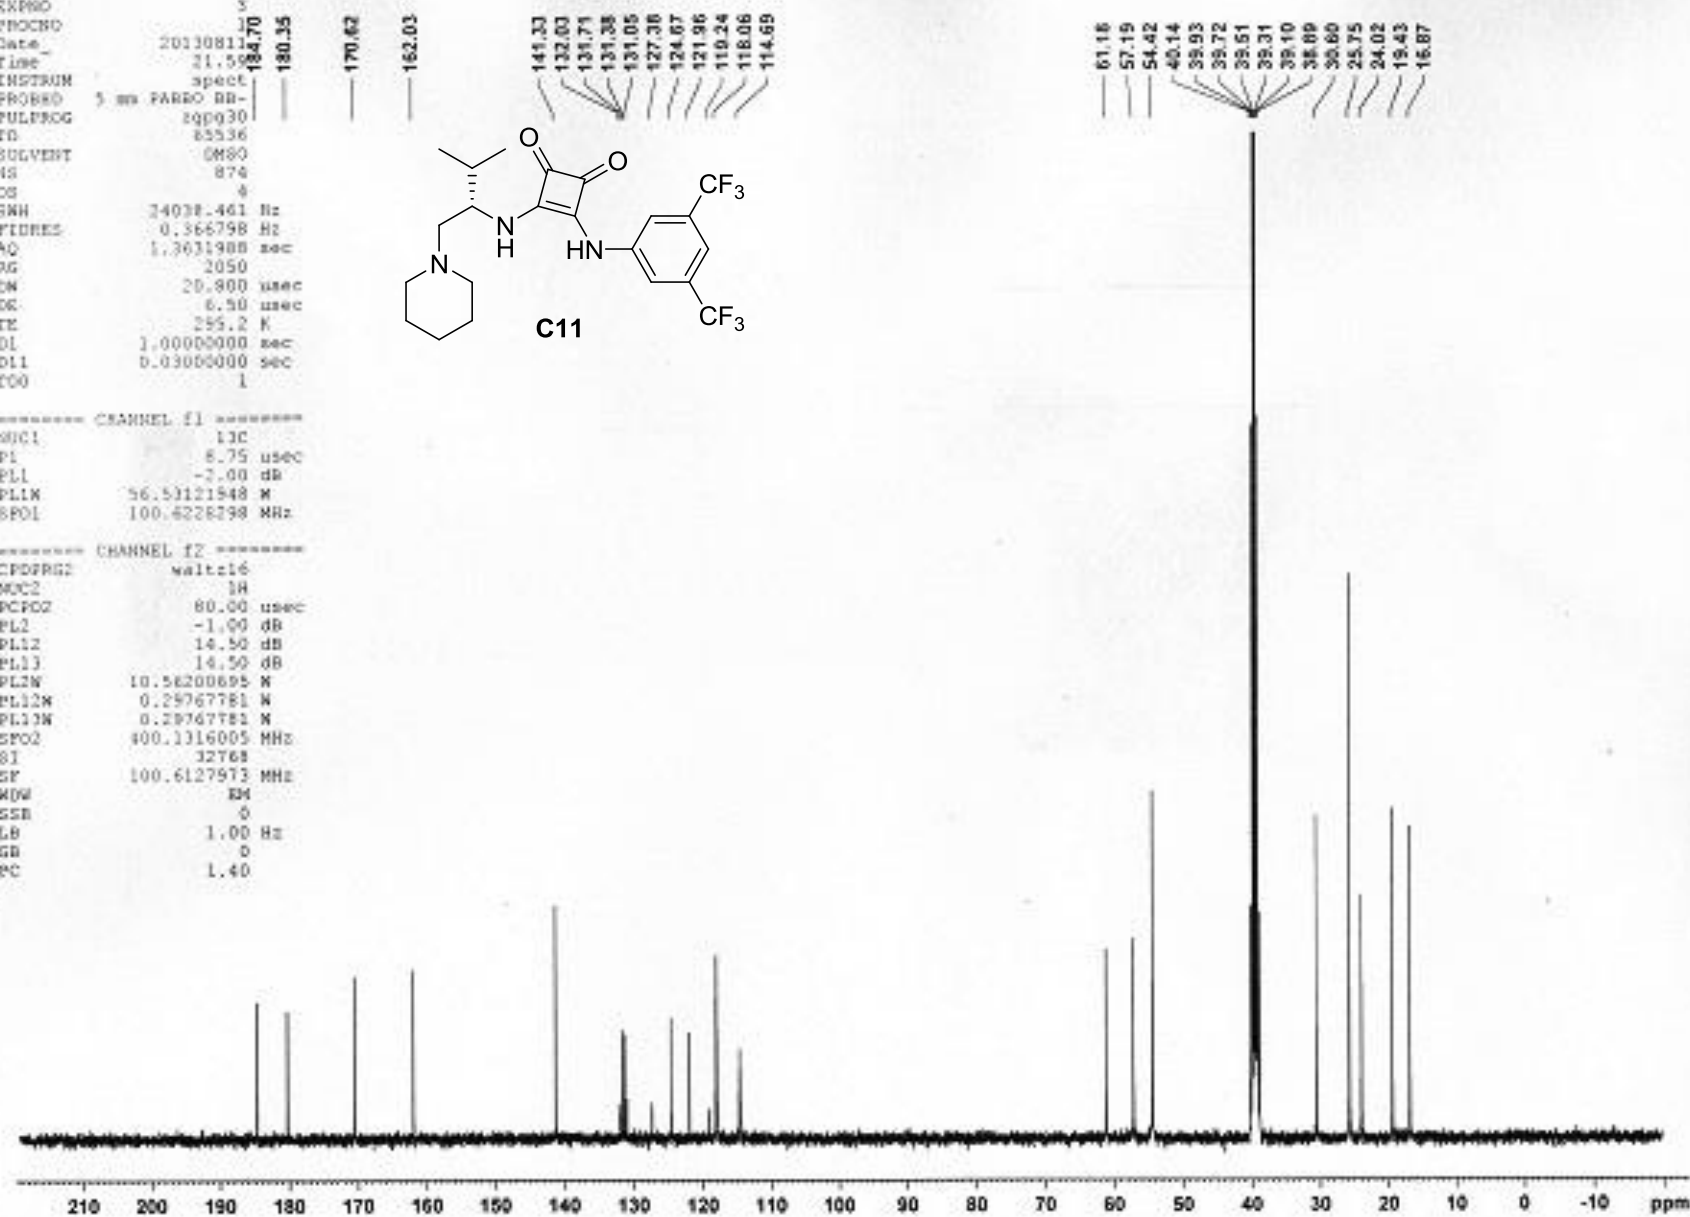

Fig S4. <sup>13</sup>C NMR Spectrum of C11



NAME INN-4-KSB-98A-1H  
 EXPNO 9  
 PROCNO 1  
 Date\_ 20130728  
 Time\_ 19.44  
 INSTRUM spect  
 PROBHD 5 mm PABBO BB-  
 PULPROG zg30  
 TD 65536  
 SOLVENT DMSO  
 NS 7  
 DS 0  
 SWH 8223.685 Hz  
 FIDRES 0.125483 Hz  
 AQ 3.9846387 sec  
 RG 32  
 DW 60.800 usec  
 DE 6.50 usec  
 TE 295.6 K  
 D1 1.00000000 sec  
 TD0 1

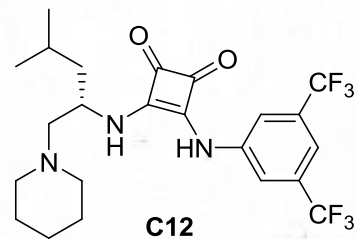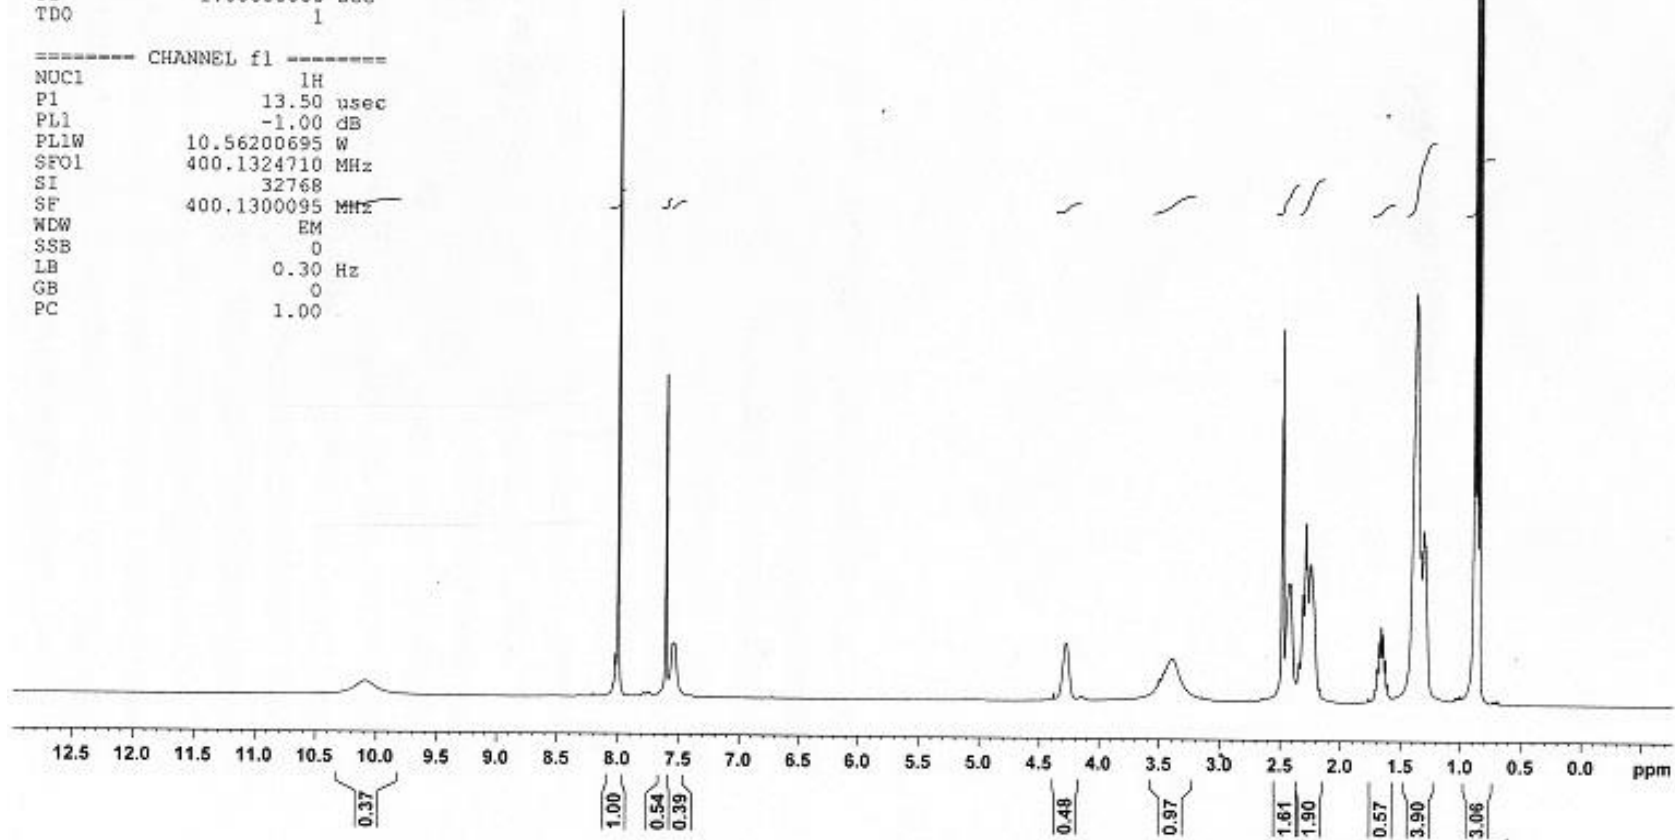

Fig S5. <sup>1</sup>H NMR Spectrum of C12

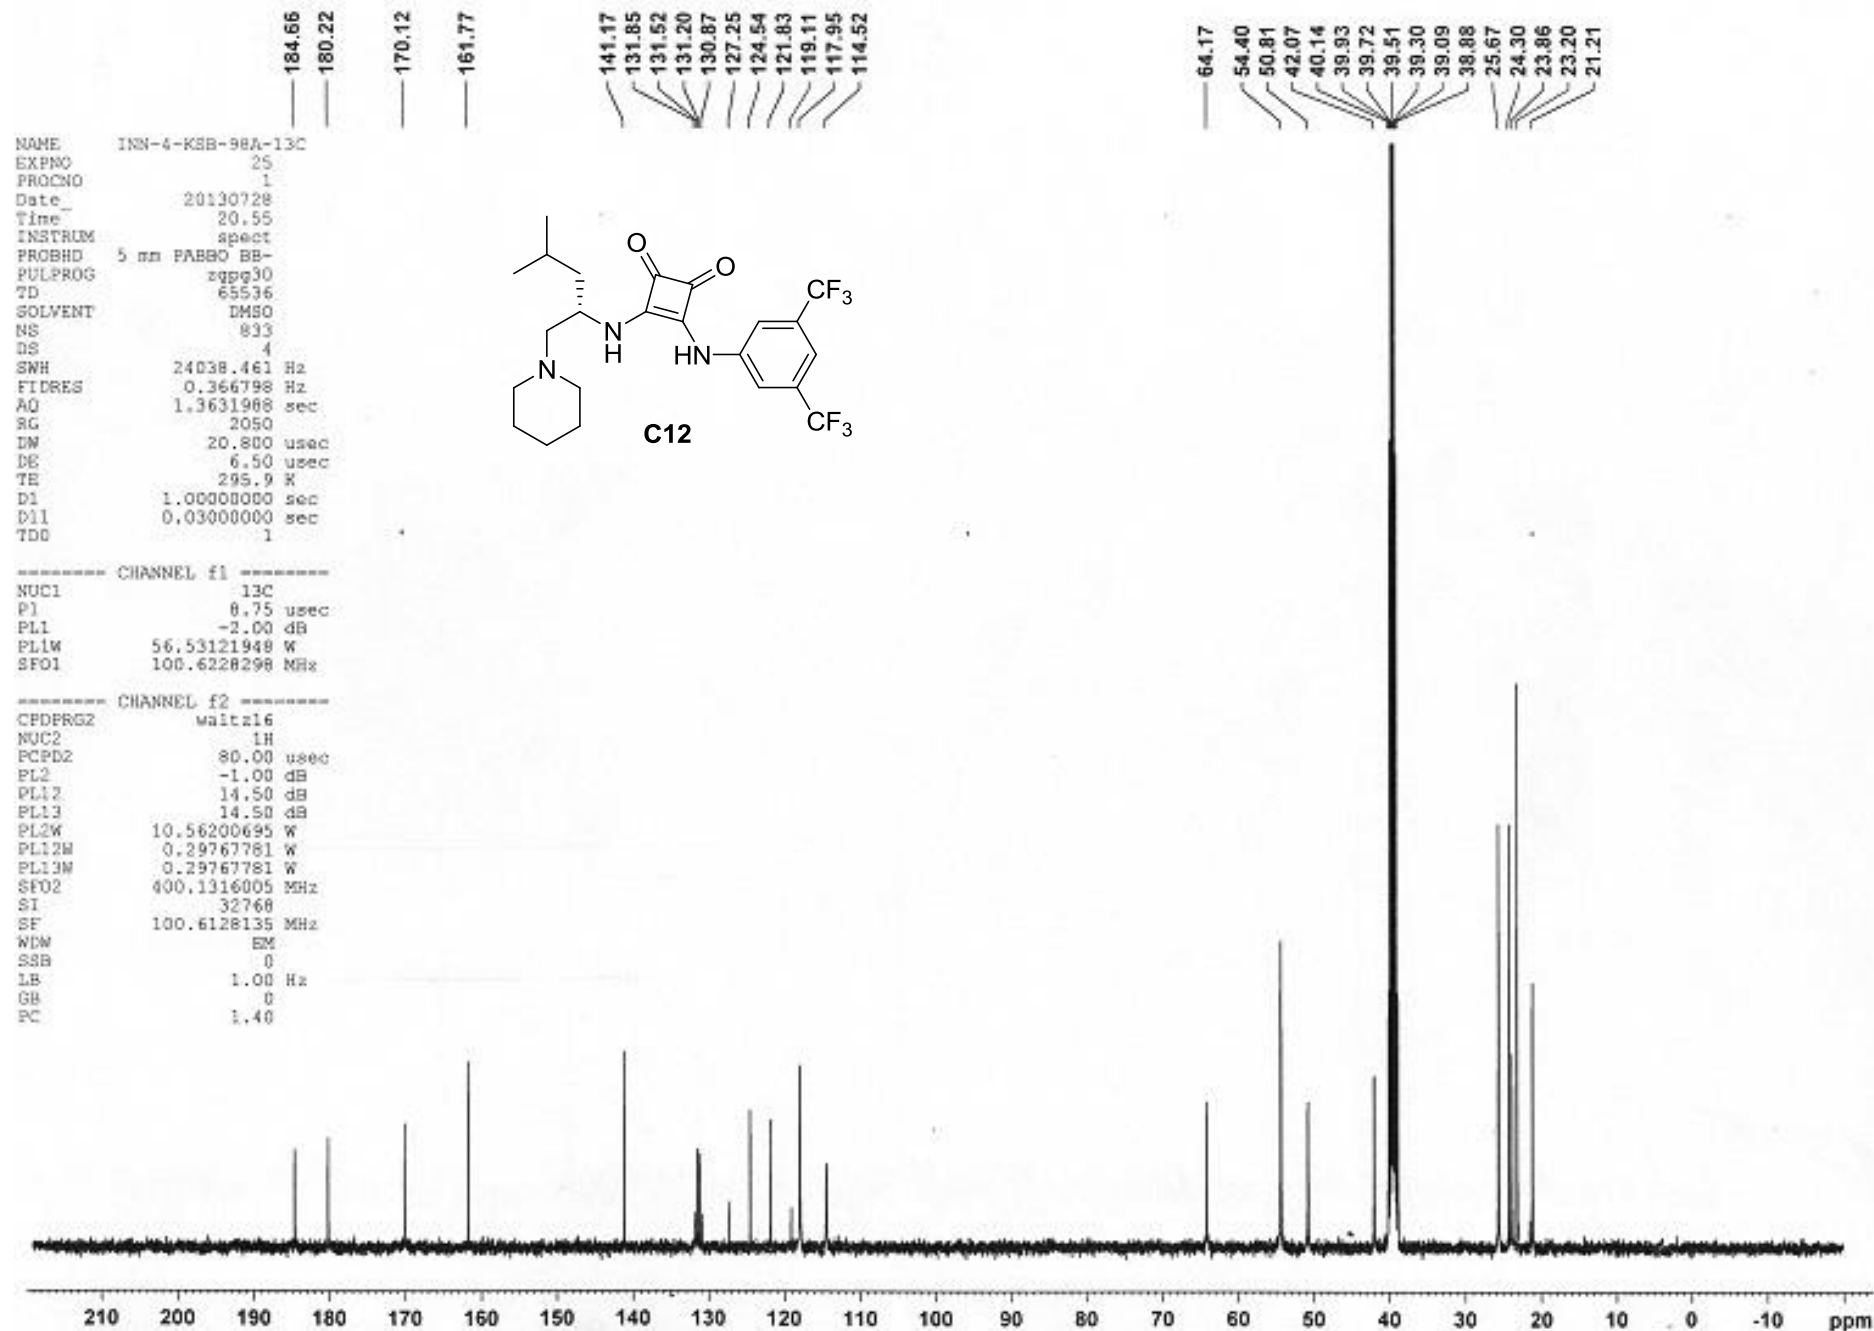

Fig S6. <sup>13</sup>C NMR Spectrum of C12

NAME INN-3-KSB-187A-1H  
 EXPNO 8  
 PROCNO 1  
 Date 20121122  
 Time 20.38  
 INSTRUM spect  
 PROBHD 5 mm PABBO BB-  
 PULPROG zg30  
 TD 65536  
 SOLVENT CDC13  
 NS 16  
 DS 0  
 SWH 8223.685 Hz  
 FIDRES 0.125483 Hz  
 AQ 3.9846387 sec  
 RG 57  
 DW 60.800 usec  
 DE 6.50 usec  
 TE 293.7 K  
 D1 1.00000000 sec  
 TD0 1

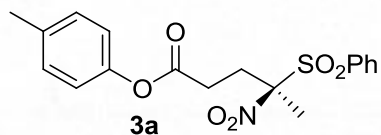

----- CHANNEL f1 -----  
 NUC1 1H  
 P1 13.50 usec  
 PL1 -1.00 dB  
 PL1W 10.56200695 W  
 SFO1 400.1324710 MHz  
 SI 32768  
 SF 400.1300095 MHz  
 WDW EM  
 SSB 0  
 LB 0.30 Hz  
 GB 0  
 PC 1.00

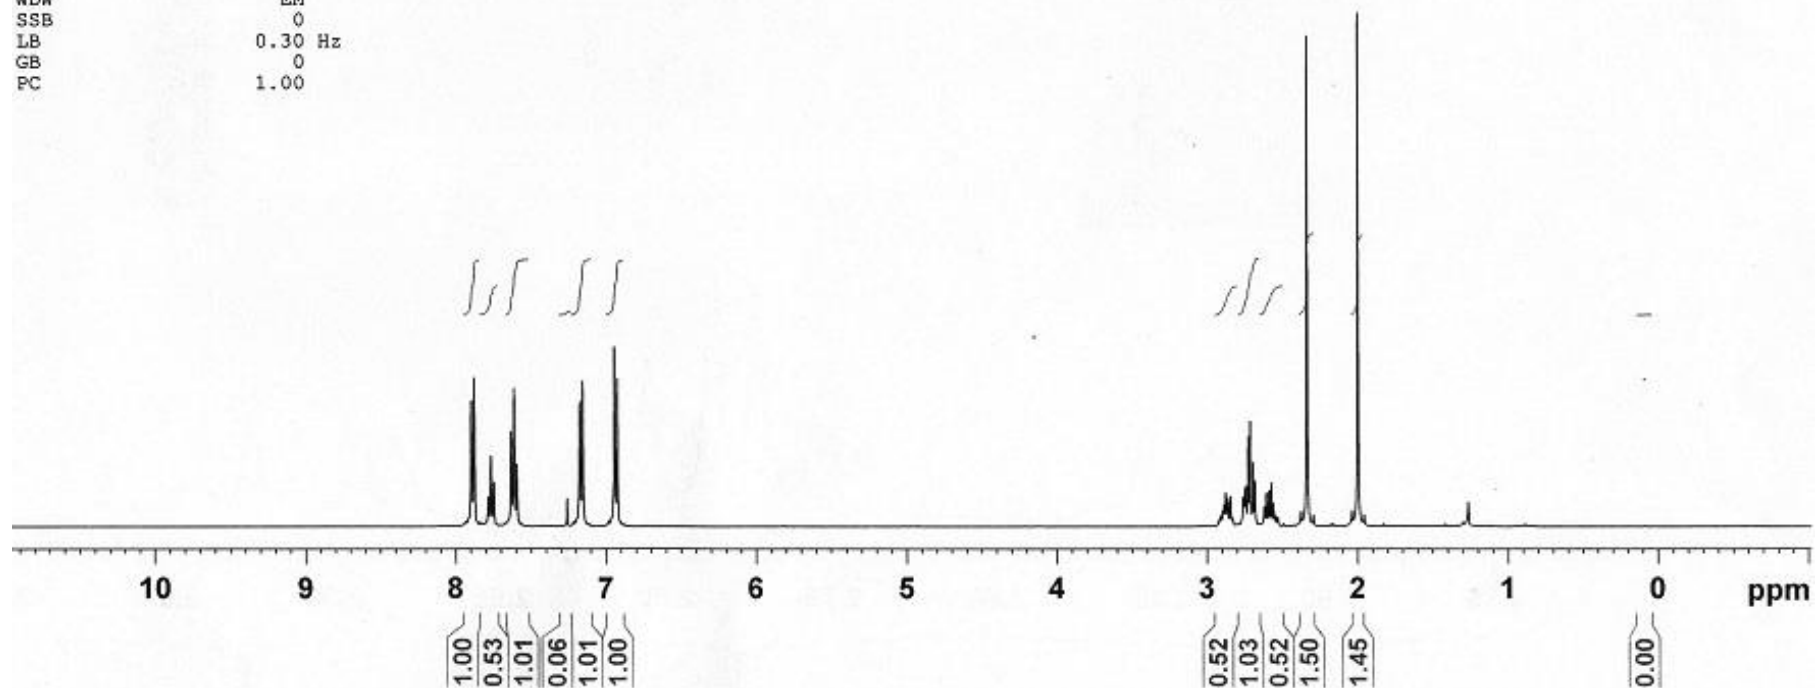

Fig S7. <sup>1</sup>H NMR Spectrum of 3a

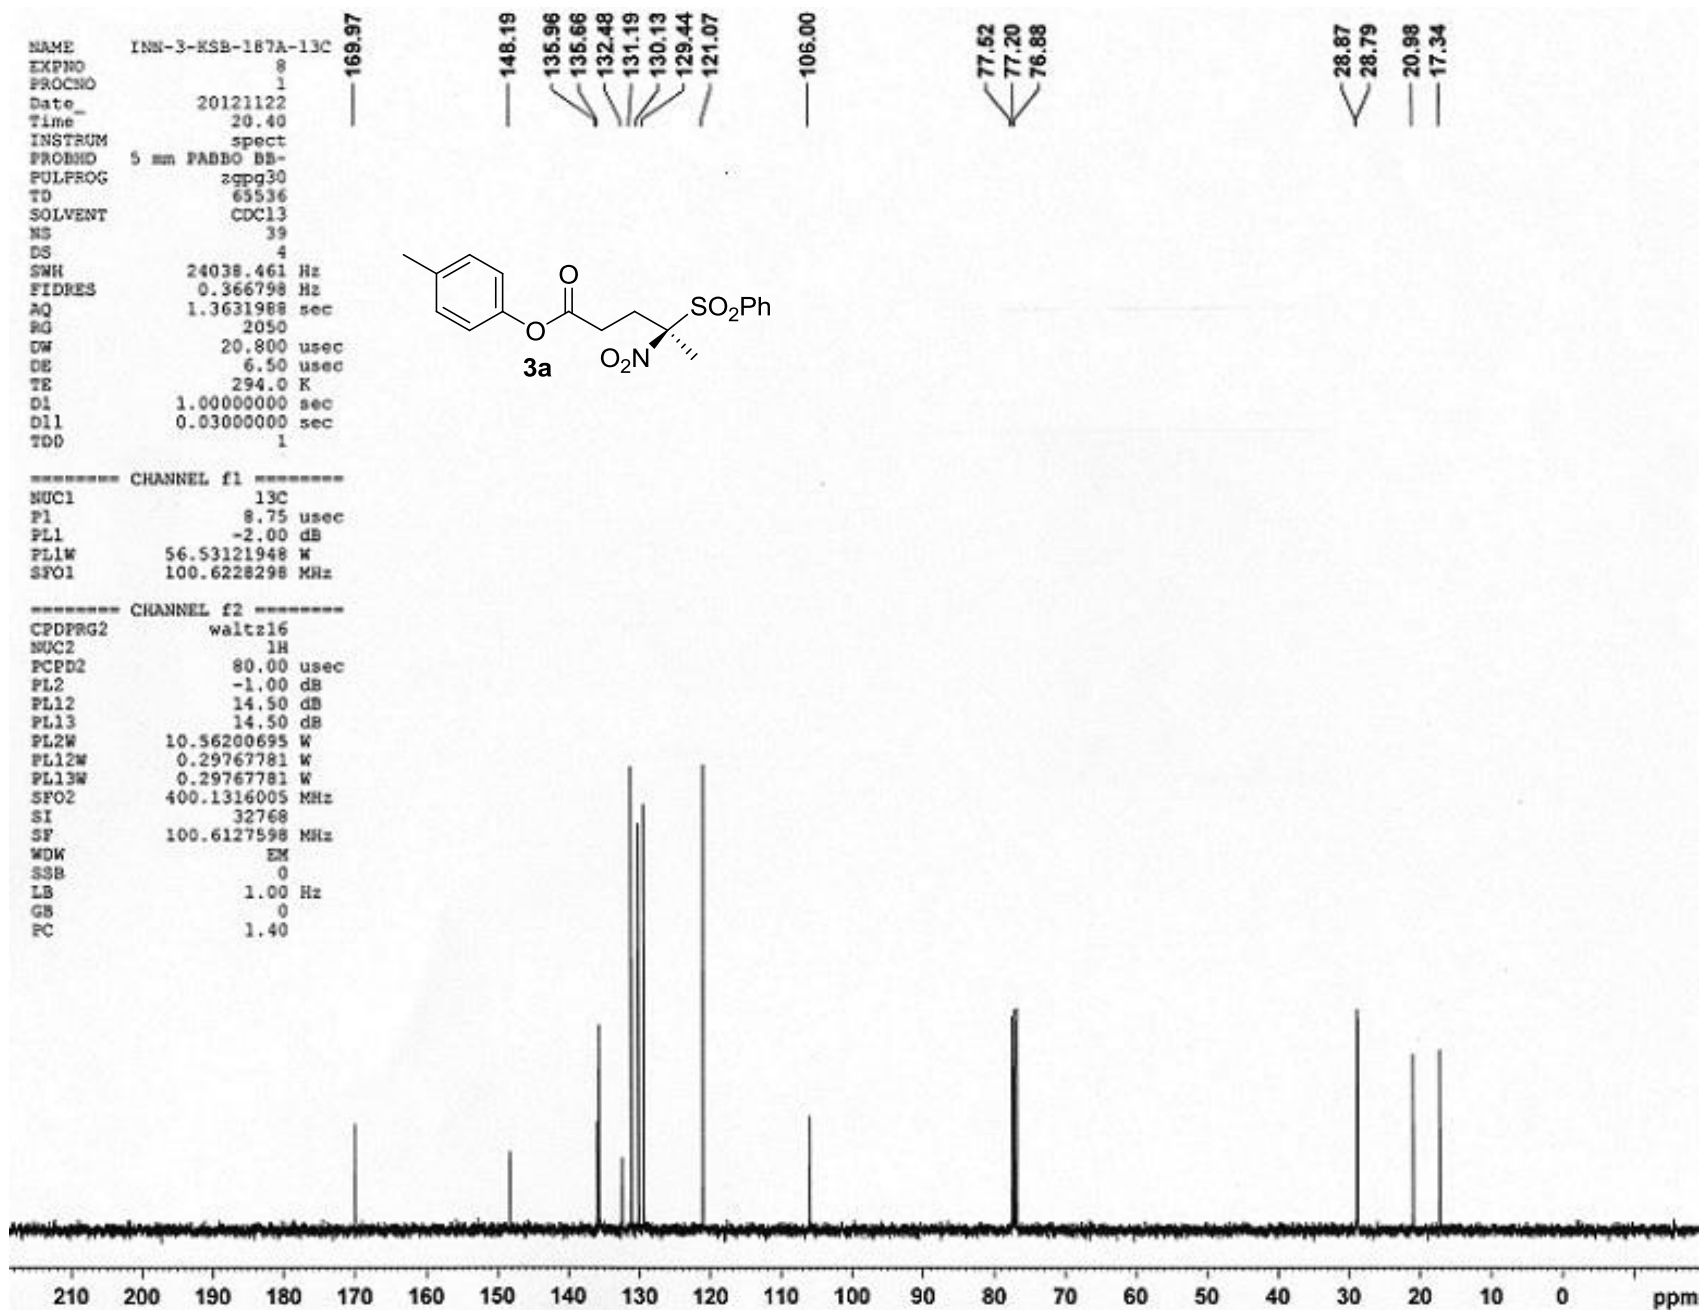

Fig S8. <sup>13</sup>C NMR Spectrum of 3a

# Chromatogram : ksb-4-ODH-2R-B-2\_channel2

System : JASCO HPLC  
Method : ksb-5-05f-216  
User : User1

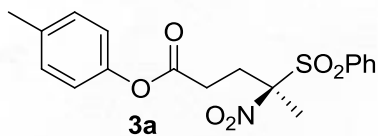

Acquired : 12/5/2012 7:10:10 PM  
Processed : 12/5/2012 9:07:00 PM  
Printed : 5/31/2013 4:31:01 PM

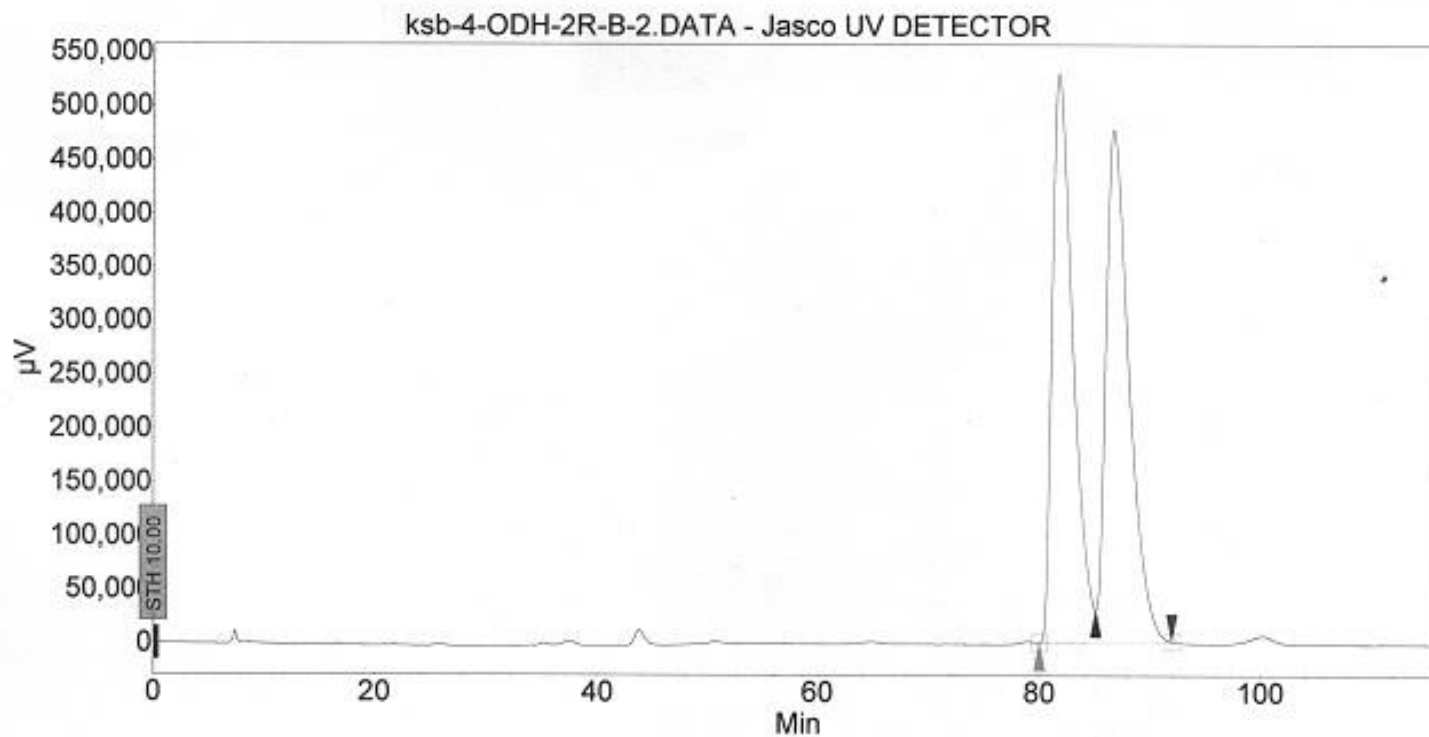

## Peak results :

| Index | Name    | Time [Min] | Quantity [% Area] | Height [μV] | Area [μV.Min] | Area % [%] |
|-------|---------|------------|-------------------|-------------|---------------|------------|
| 1     | UNKNOWN | 81.700     | 49.70             | 529339.3    | 1145375.1     | 49.703     |
| 2     | UNKNOWN | 86.617     | 50.30             | 476969.4    | 1159066.0     | 50.297     |
| Total |         |            | 100.00            | 1006308.7   | 2304441.1     | 100.000    |

Fig S9. HPLC Profile of Racemic 3a

# Chromatogram : ksb-4-ODH-1r-A-56\_channel5

System : JASCO HPLC  
Method : ksb-5-05f-258  
User : User1

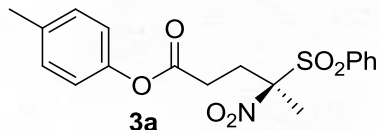

Acquired : 4/24/2013 12:15:19 PM  
Processed : 4/24/2013 1:59:42 PM  
Printed : 5/31/2013 4:08:37 PM

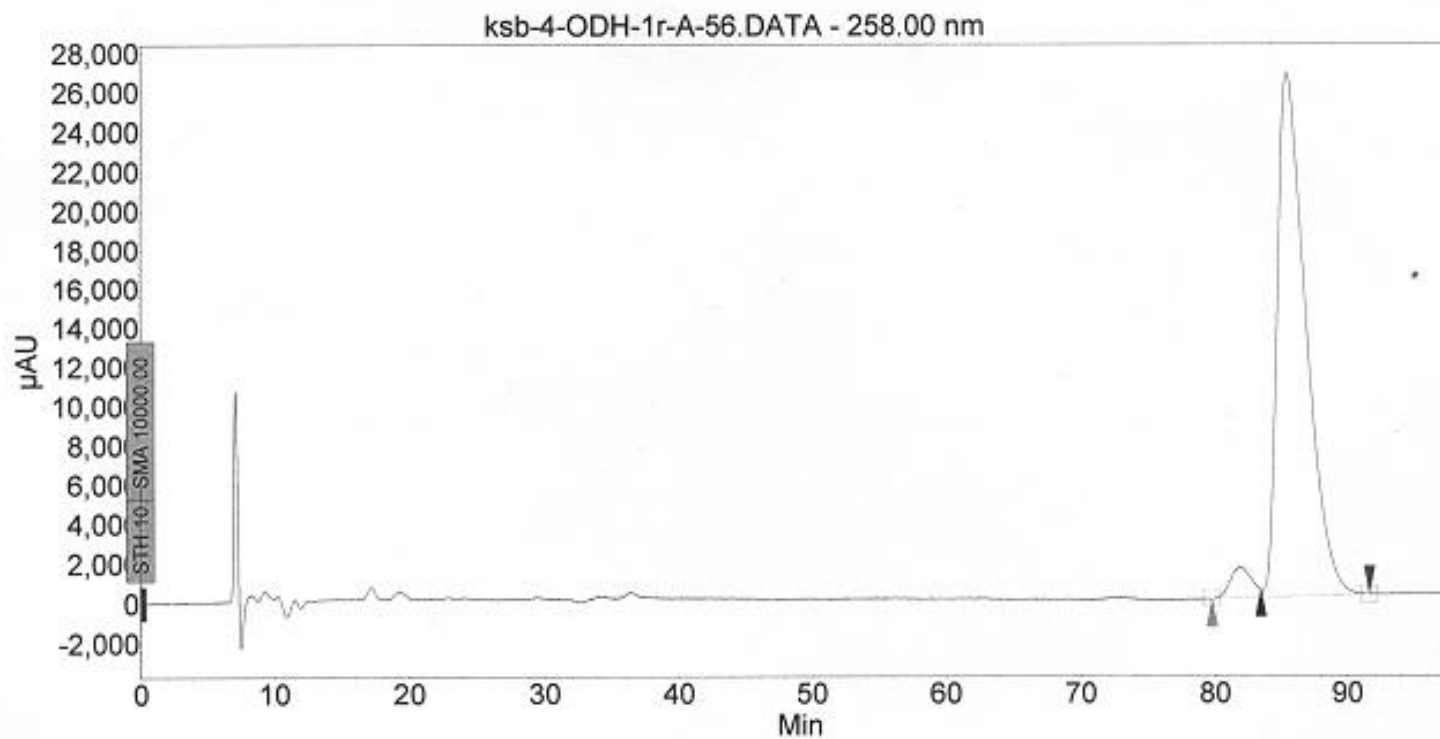

## Peak results :

| Index | Name    | Time [Min] | Quantity [% Area] | Height [μAU] | Area [μAU.Min] | Area % [%] |
|-------|---------|------------|-------------------|--------------|----------------|------------|
| 1     | UNKNOWN | 81.864     | 4.18              | 1539.7       | 2910.2         | 4.182      |
| 2     | UNKNOWN | 85.436     | 95.82             | 26663.7      | 66681.6        | 95.818     |
| Total |         |            | 100.00            | 28203.4      | 69591.7        | 100.000    |

Fig S10. HPLC Profile of Enantioenriched 3a

NAME INN-4-KSB-33C-1H  
 EXPNO 2  
 PROCNO 1  
 Date\_ 20130223  
 Time 18.54  
 INSTRUM spect  
 PROBHD 5 mm PABBO BB-  
 PULPROG zg30  
 TD 65536  
 SOLVENT CDCl3  
 NS 16  
 DS 0  
 SWH 8223.685 Hz  
 FIDRES 0.125483 Hz  
 AQ 3.9846387 sec  
 RG 32  
 DW 60.800 usec  
 DE 6.50 usec  
 TE 293.8 K  
 D1 1.00000000 sec  
 TD0 1

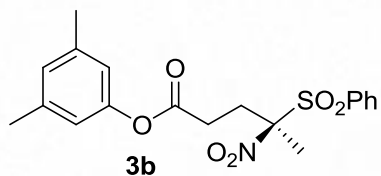

===== CHANNEL f1 =====  
 NUC1 1H  
 P1 13.50 usec  
 PL1 -1.00 dB  
 PL1W 10.56200695 W  
 SFO1 400.1324710 MHz  
 SI 32768  
 SF 400.1300095 MHz  
 WDW EM  
 SSB 0  
 LB 0.30 Hz  
 GB 0  
 PC 1.00

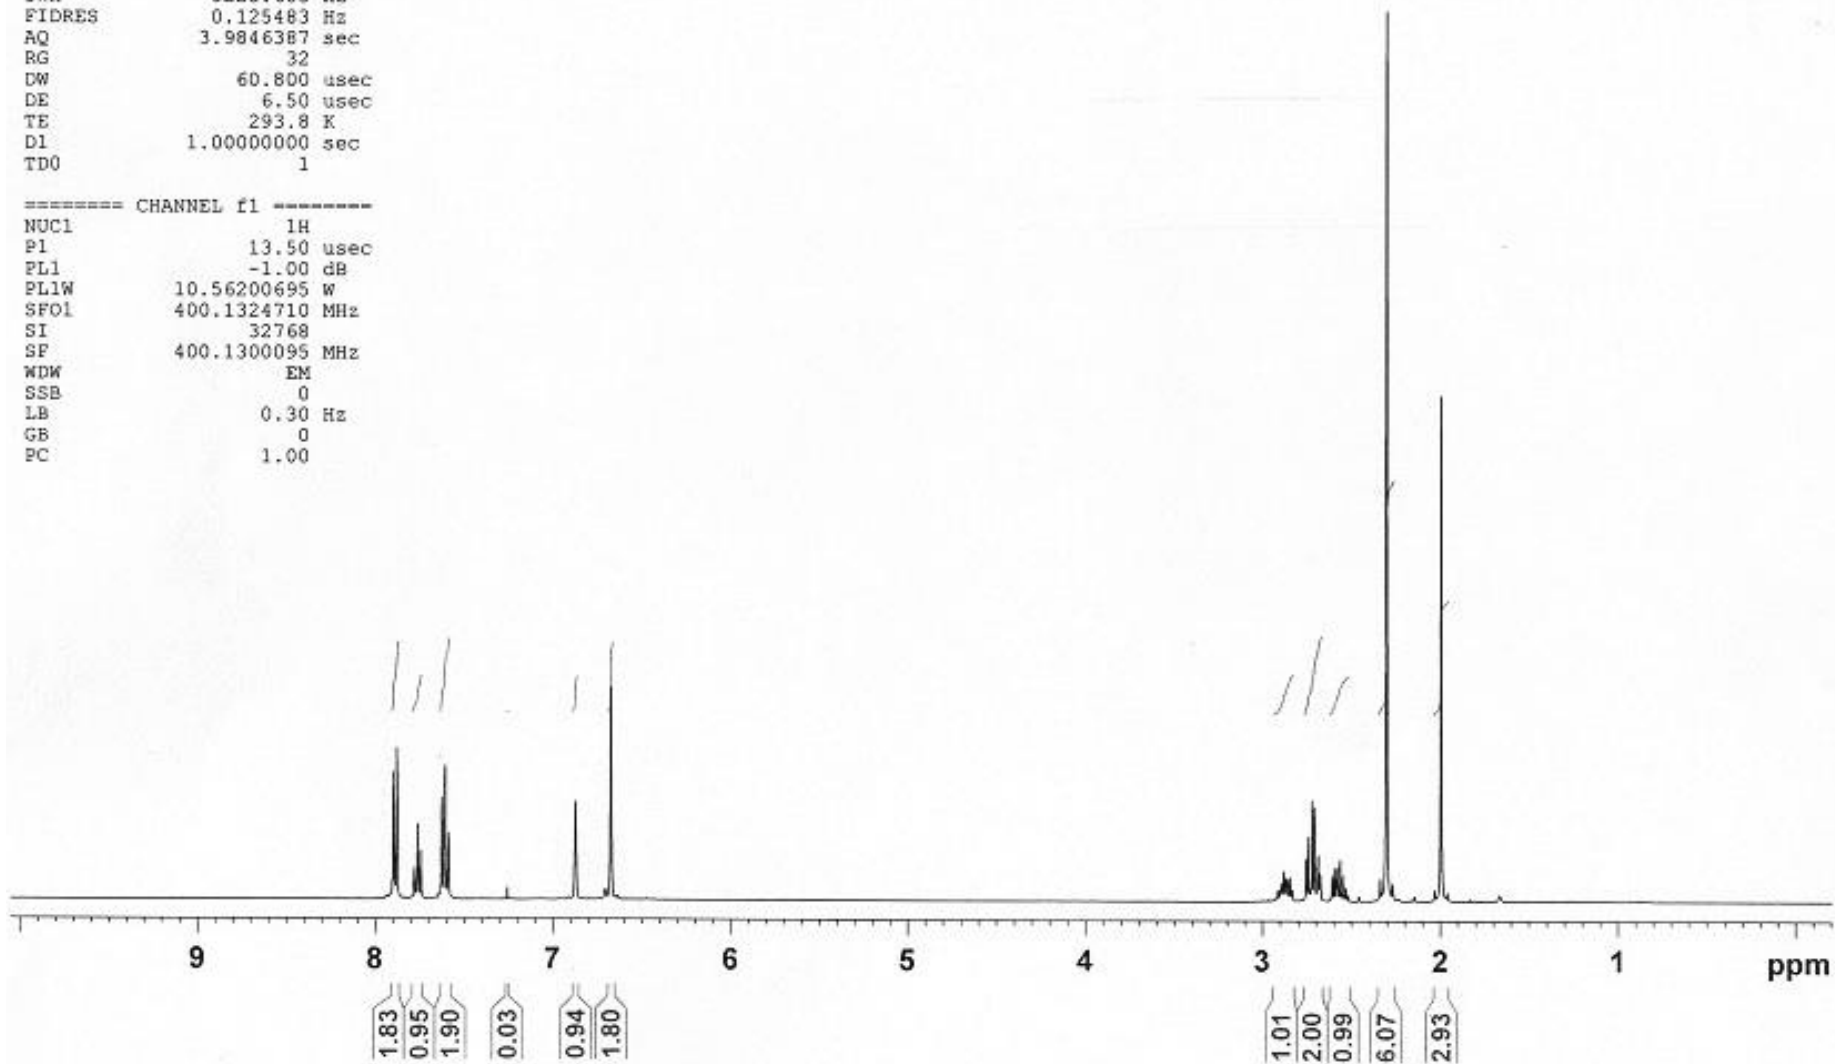

Fig S11. <sup>1</sup>H NMR Spectrum of 3b

```

NAME      INN-4-KSB-33C-13C
EXPNO    2
PROCNO   1
Date_    20130223
Time     18.54
INSTRUM  spect
PROBHD   5 mm PABBO BB-
PULPROG  zgpg30
TD       65536
SOLVENT  CDCl3
NS       65
DS       4
SMH      24038.461 Hz
FIDRES   0.366798 Hz
AQ       1.3631988 sec
RG       2050
DW       20.800 usec
DE       6.50 usec
TE       293.8 K
D1       1.0000000 sec
D11      0.0300000 sec
TDO      1

```

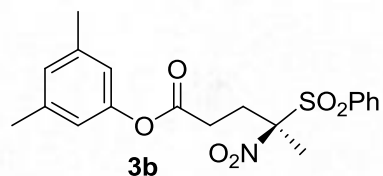

```

===== CHANNEL f1 =====
NUC1     13C
P1       8.75 usec
PL1      -2.00 dB
PLLW     56.53121948 W
SFO1     100.6228298 MHz

```

```

===== CHANNEL f2 =====
CPDPRG2  waltz16
NUC2     1H
PCPD2    80.00 usec
PL2      -1.00 dB
PL12     14.50 dB
PL13     14.50 dB
PL2W     10.56200695 W
PL12W    0.29767781 W
PL13W    0.29767781 W
SFO2     400.1316005 MHz
SI       32768
SF       100.6127657 MHz
WDW      EM
SSB      0
LB       1.00 Hz
GB       -0
PC       1.40

```

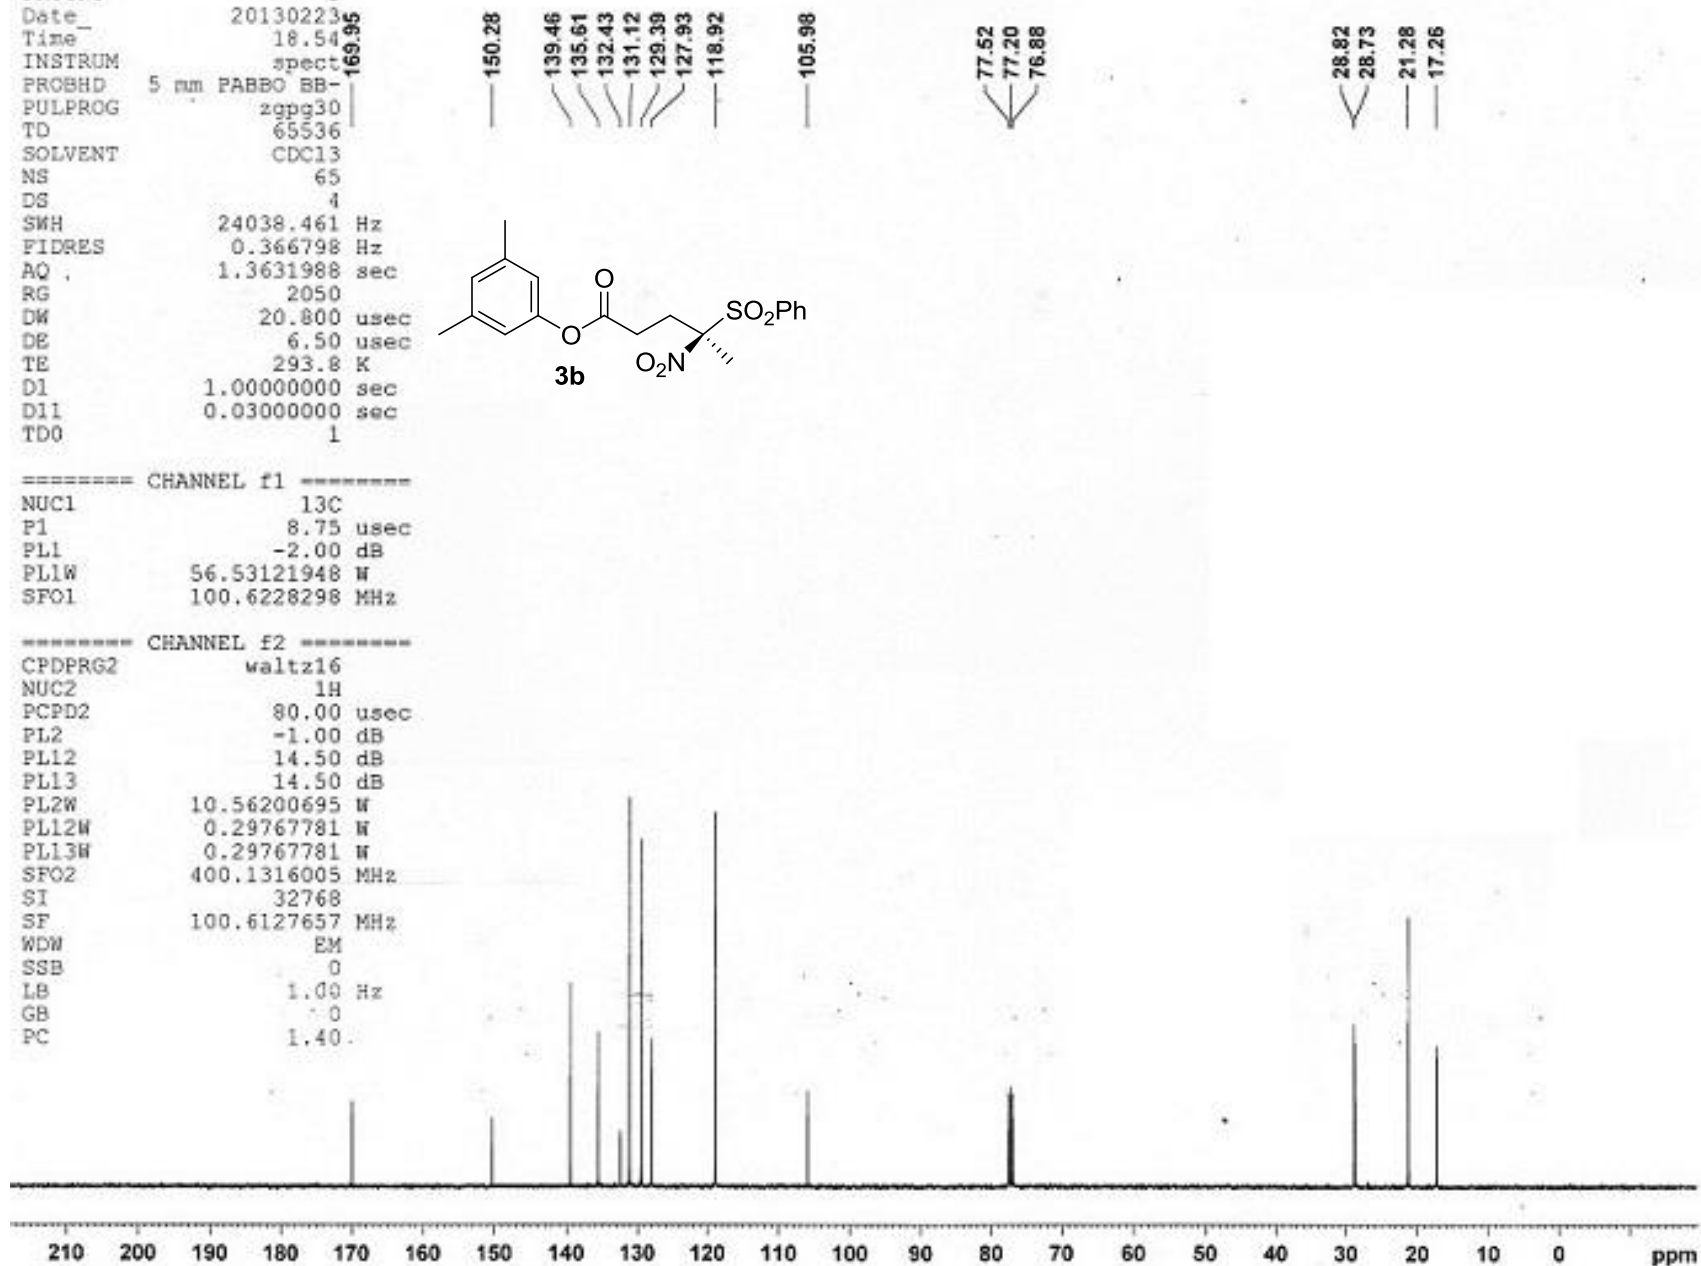

Fig S12. <sup>13</sup>C NMR Spectrum of 3b



# Chromatogram : KSB-4-ODH-1R-C-33\_channel5

System : JASCO HPLC  
Method : ksb-5-05f-216  
User : User1

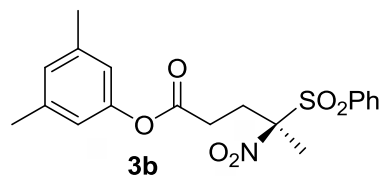

Acquired : 2/27/2013 1:46:51 PM  
Processed : 2/27/2013 4:38:00 PM  
Printed : 2/27/2013 8:46:44 PM

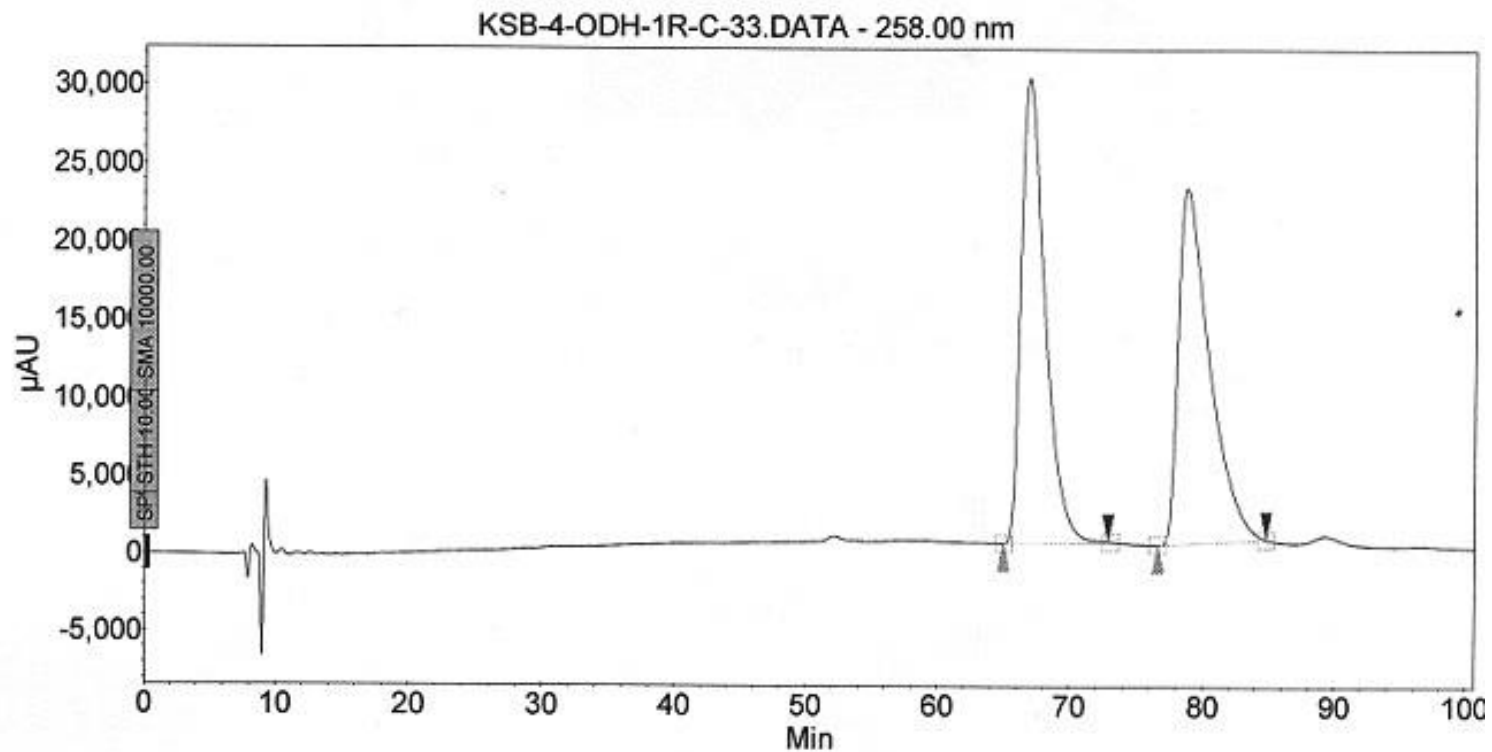

## Peak results :

| Index | Name    | Time [Min] | Quantity [% Area] | Height [μAU] | Area [μAU.Min] | Area % [%] |
|-------|---------|------------|-------------------|--------------|----------------|------------|
| 1     | UNKNOWN | 66.869     | 49.90             | 29726.7      | 62281.5        | 49.900     |
| 2     | UNKNOWN | 78.772     | 50.10             | 22774.1      | 62530.7        | 50.100     |
| Total |         |            | 100.00            | 52500.8      | 124812.2       | 100.000    |

Fig S13. HPLC Profile of Racemic 3b

# Chromatogram : ksb-4-ODH-1r-C-62\_channel2

System : JASCO HPLC  
Method : ksb-5-05f-258  
User : User1

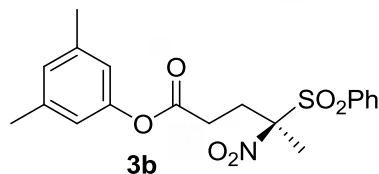

Acquired : 5/6/2013 3:05:46 PM  
Processed : 5/6/2013 4:46:26 PM  
Printed : 5/6/2013 10:07:20 PM

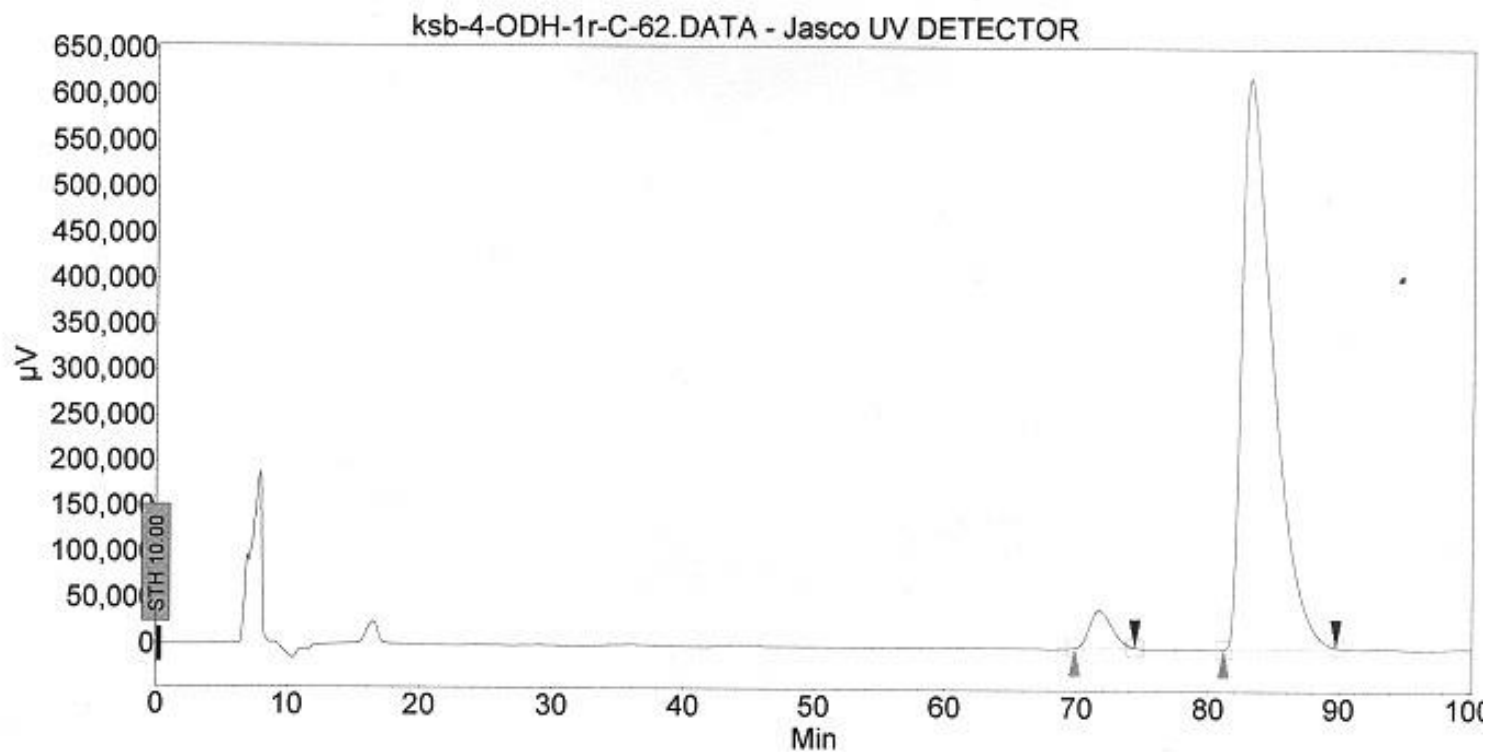

## Peak results :

| Index | Name    | Time [Min] | Quantity [% Area] | Height [ $\mu$ V] | Area [ $\mu$ V.Min] | Area % [%] |
|-------|---------|------------|-------------------|-------------------|---------------------|------------|
| 1     | UNKNOWN | 71.700     | 4.46              | 40901.1           | 80043.6             | 4.457      |
| 2     | UNKNOWN | 83.075     | 95.54             | 622257.7          | 1715687.9           | 95.543     |
| Total |         |            | 100.00            | 663158.8          | 1795731.5           | 100.000    |

Fig S14. HPLC Profile of Enantioenriched 3b

NAME INN-4-KSB-31B-1H  
EXPNO 1  
PROCNO 1  
Date\_ 20130219  
Time\_ 20.26  
INSTRUM spect  
PROBHD 5 mm PABBO BB-  
PULPROG zg30  
TD 65536  
SOLVENT CDCl3  
NS 14  
DS 0  
SWH 8223.685 Hz  
FIDRES 0.125483 Hz  
AQ 3.9846387 sec  
RG 32  
DW 60.800 usec  
DE 6.50 usec  
TE 294.2 K  
D1 1.0000000 sec  
TDO 1

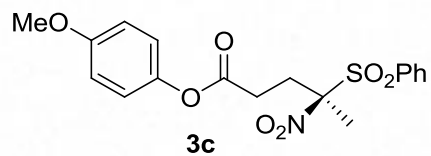

===== CHANNEL f1 =====  
NUC1 1H  
P1 13.50 usec  
PL1 -1.00 dB  
PL1W 10.56200695 W  
SFO1 400.1324710 MHz  
SI 32768  
SF 400.1300095 MHz  
WDW EM  
SSB 0  
LB 0.30 Hz  
GB 0  
PC 1.00

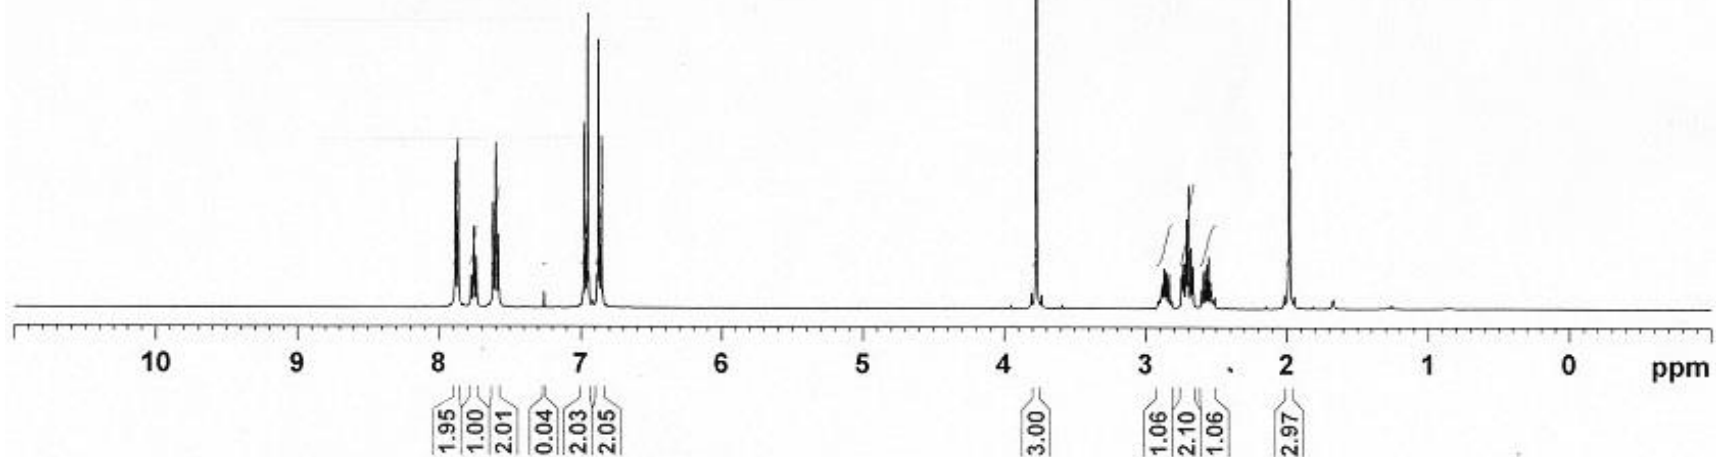

Fig S15. <sup>1</sup>H NMR Spectrum of 3c

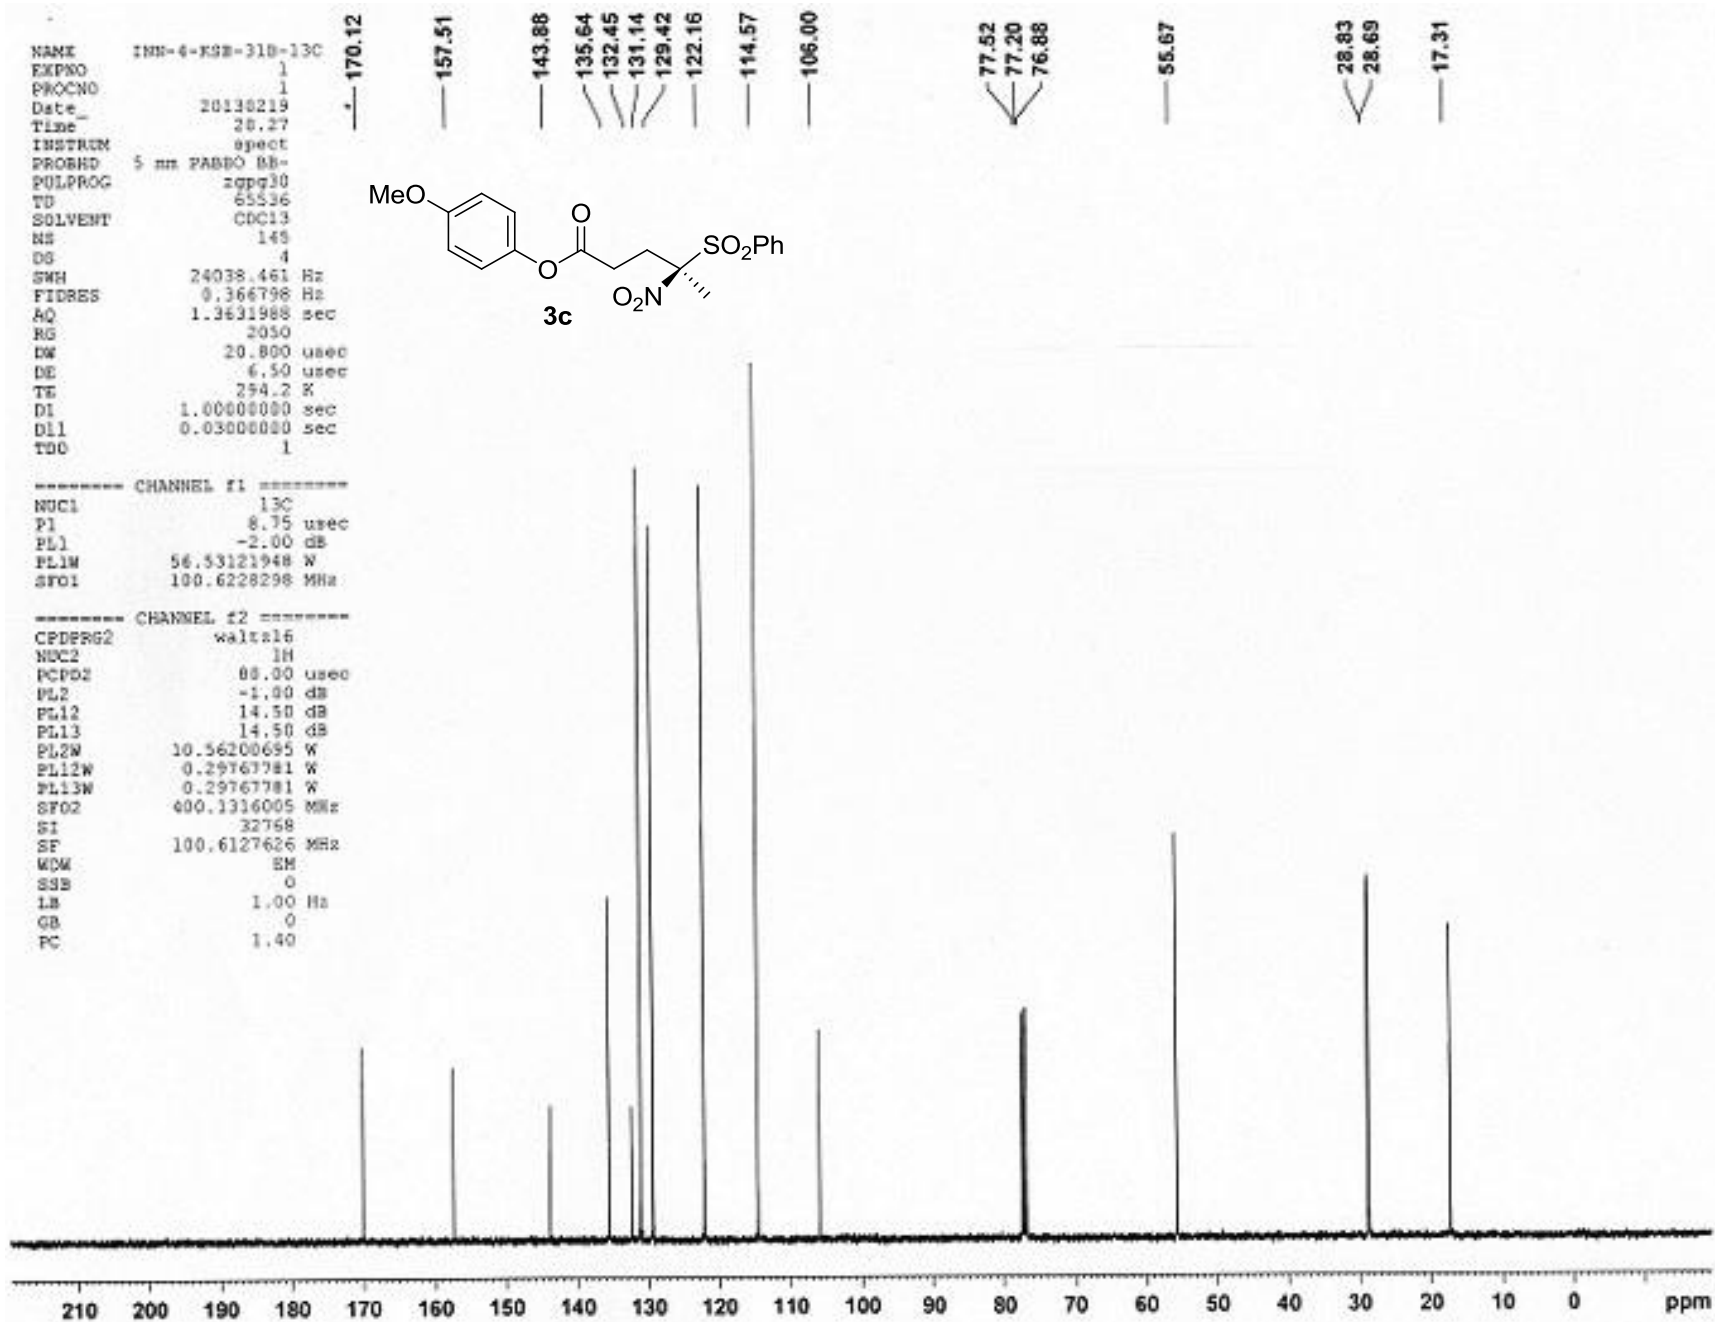

Fig S16. <sup>13</sup>C NMR Spectrum of 3c

## Chromatogram : ksb-4-ADH-3r-B-31\_channel2

System : Jasco HPLC  
 Method : ksb-4%-05-250nm  
 User : User1

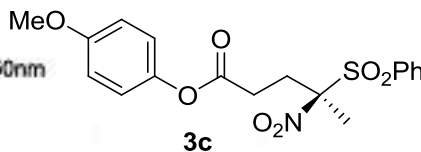

Acquired : 5/27/2013 5:33:12 PM  
 Processed : 5/27/2013 7:28:27 PM  
 Printed : 5/27/2013 7:33:39 PM

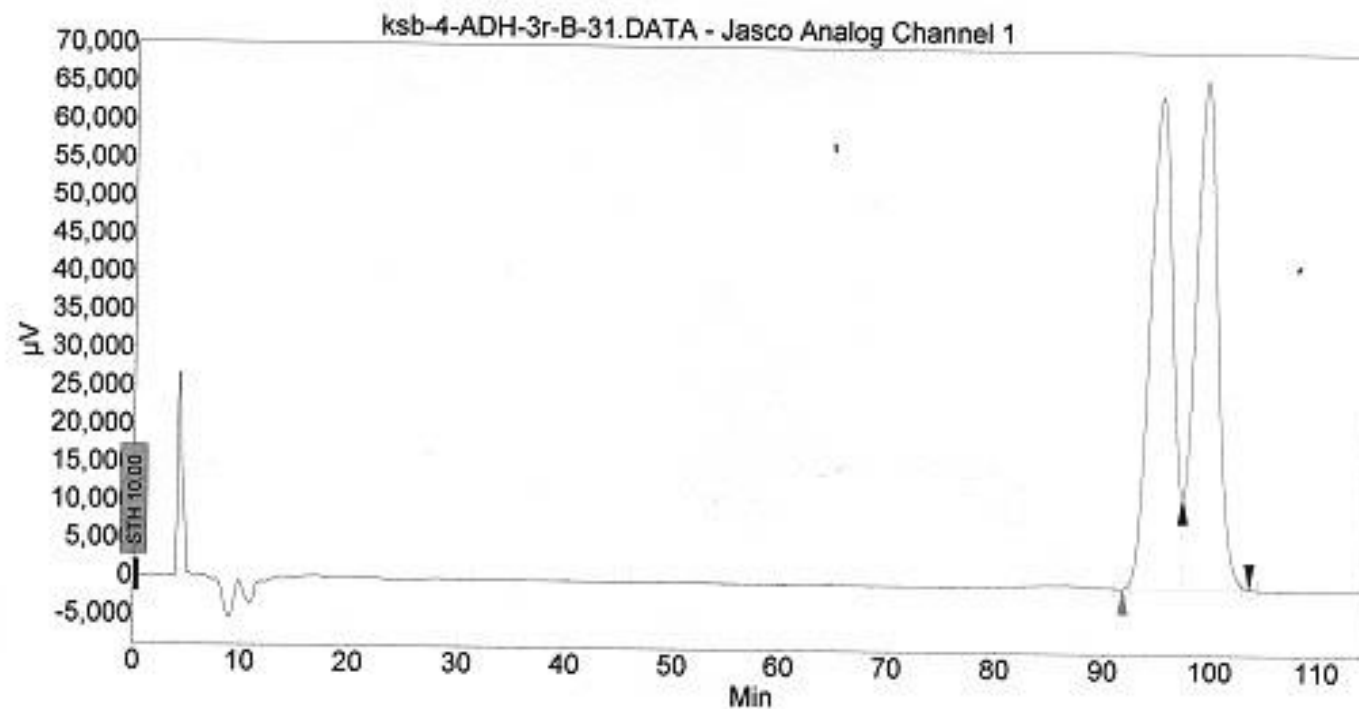

### Peak results :

| Index | Name    | Time [Min] | Quantity [% Area] | Height [µV] | Area [µV.Min] | Area % [%] |
|-------|---------|------------|-------------------|-------------|---------------|------------|
| 1     | UNKNOWN | 95.125     | 49.52             | 64755.0     | 158707.1      | 49.516     |
| 2     | UNKNOWN | 99.325     | 50.48             | 66888.8     | 161812.4      | 50.484     |
| Total |         |            | 100.00            | 131643.8    | 320519.5      | 100.000    |

Fig S17. HPLC Profile of Racemic 3c

## Chromatogram : ksb-4-ADH-1R-A-63\_channel2

System : Jasco HPLC  
Method : ksb-4%-05-250nm  
User : User1

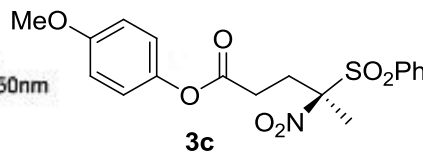

Acquired : 5/27/2013 1:41:24 PM  
Processed : 5/27/2013 3:41:06 PM  
Printed : 5/27/2013 3:44:16 PM

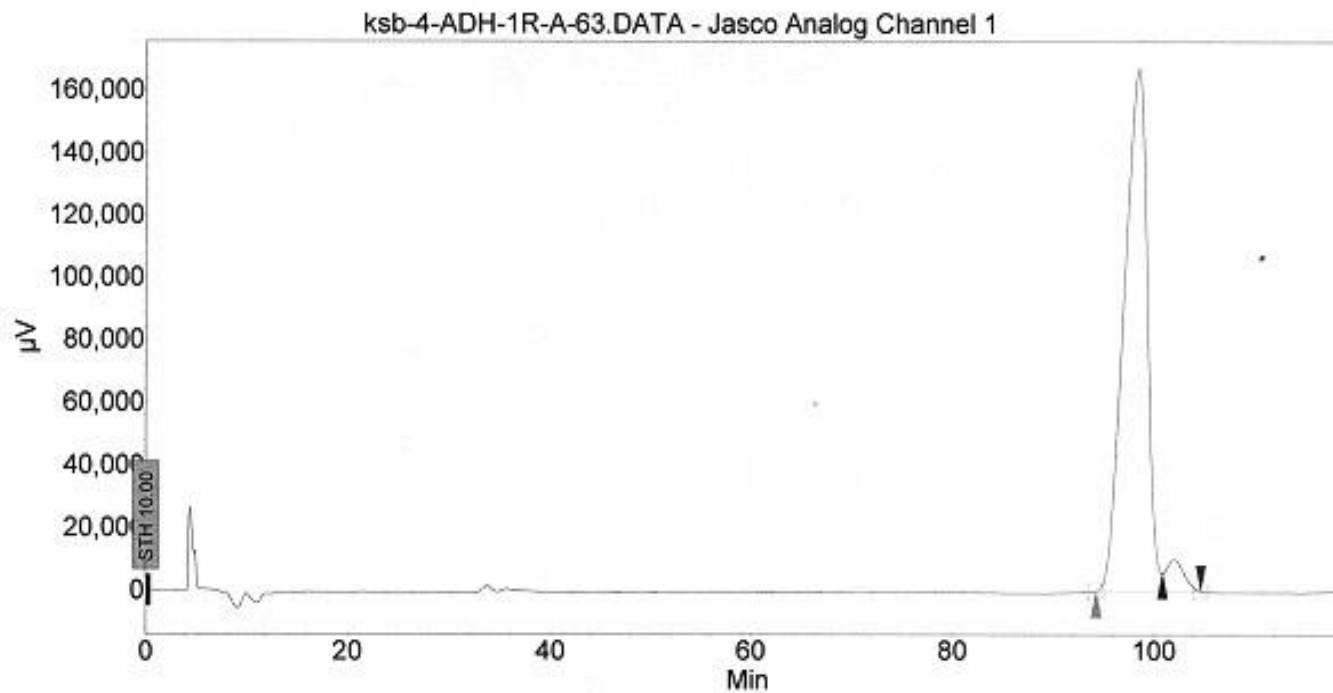

### Peak results :

| Index | Name    | Time [Min] | Quantity [% Area] | Height [μV] | Area [μV.Min] | Area % [%] |
|-------|---------|------------|-------------------|-------------|---------------|------------|
| 1     | UNKNOWN | 98.483     | 95.51             | 167473.7    | 447971.3      | 95.511     |
| 2     | UNKNOWN | 102.008    | 4.49              | 10125.0     | 21055.5       | 4.489      |
| Total |         |            | 100.00            | 177598.7    | 469026.8      | 100.000    |

Fig S18. HPLC Profile of Enantioenriched 3c

```

NAME      INN-4-KSB-32C-1H
EXPNO    1
PROCNO   1
Date_    20130219
Time     20.37
INSTRUM  spect
PROBHD   5 mm PABBO BB-
PULPROG  zg30
TD       65536
SOLVENT  CDCl3
NS       15
DS       0
SWH      8223.685 Hz
FIDRES   0.125483 Hz
AQ       3.9846387 sec
RG       32
DW       60.800 usec
DE       6.50 usec
TE       294.3 K
D1       1.00000000 sec
TD0      1

```

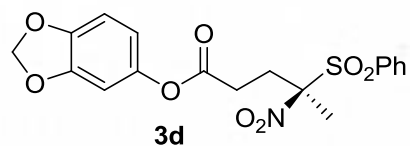

```

----- CHANNEL f1 -----
NUC1     1H
P1       13.50 usec
PL1      -1.00 dB
PL1W     10.56200695 W
SF01     400.1324710 MHz
SI       32768
SF       400.1300095 MHz
WDW      EM
SSB      0
LB       0.30 Hz
GB       0
PC       1.00

```

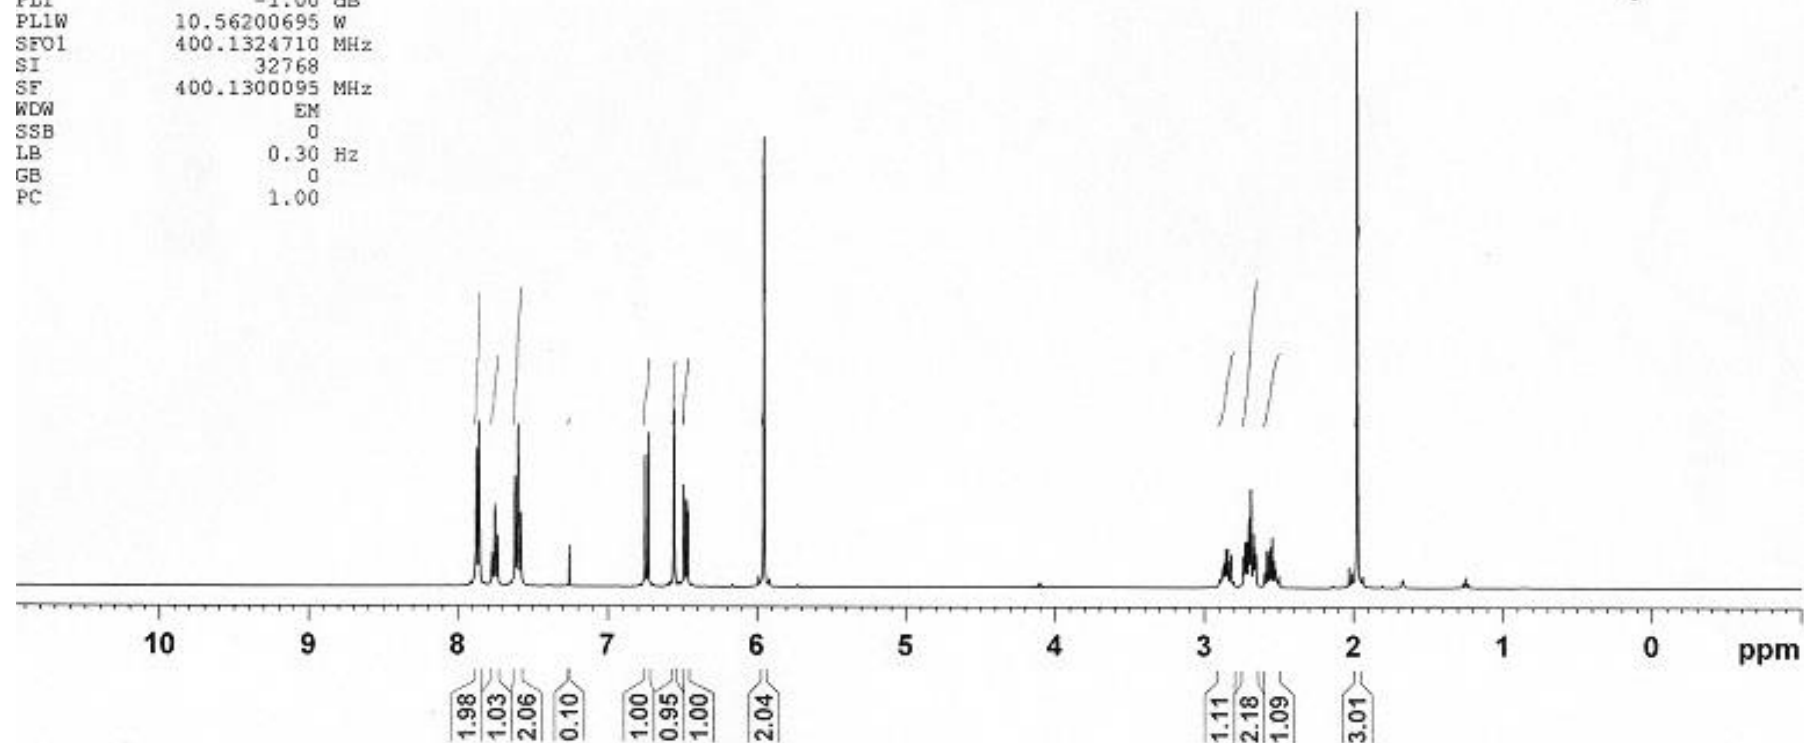

Fig S19. <sup>1</sup>H NMR Spectrum of 3d

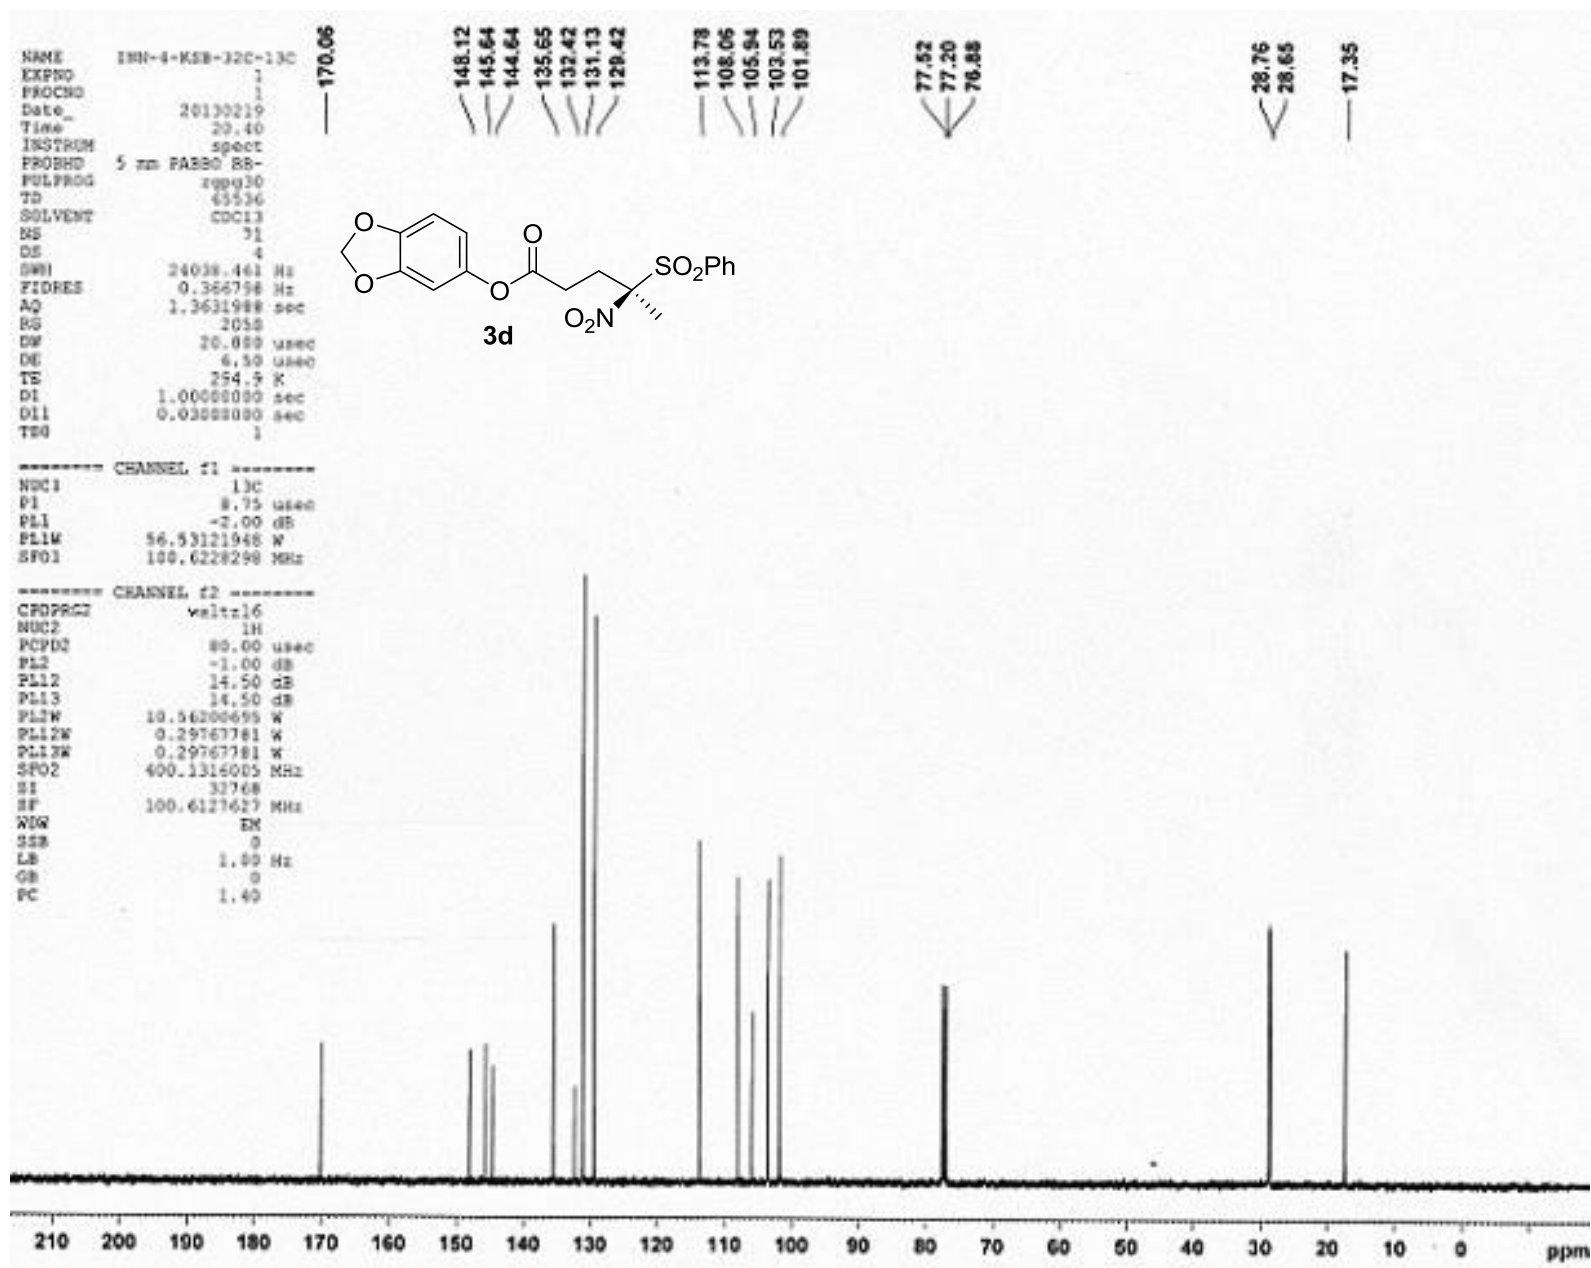

Fig S20. <sup>13</sup>C NMR Spectrum of 3d



# Chromatogram : ksb-4-ODH-6r-C-32\_channel2

System : Jasco HPLC  
Method : ksb-10%-05f-250nm  
User : User1

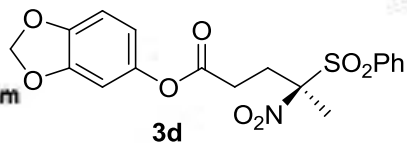

Acquired : 5/9/2013 2:38:15 PM  
Processed : 5/9/2013 8:49:18 PM  
Printed : 5/9/2013 8:50:21 PM

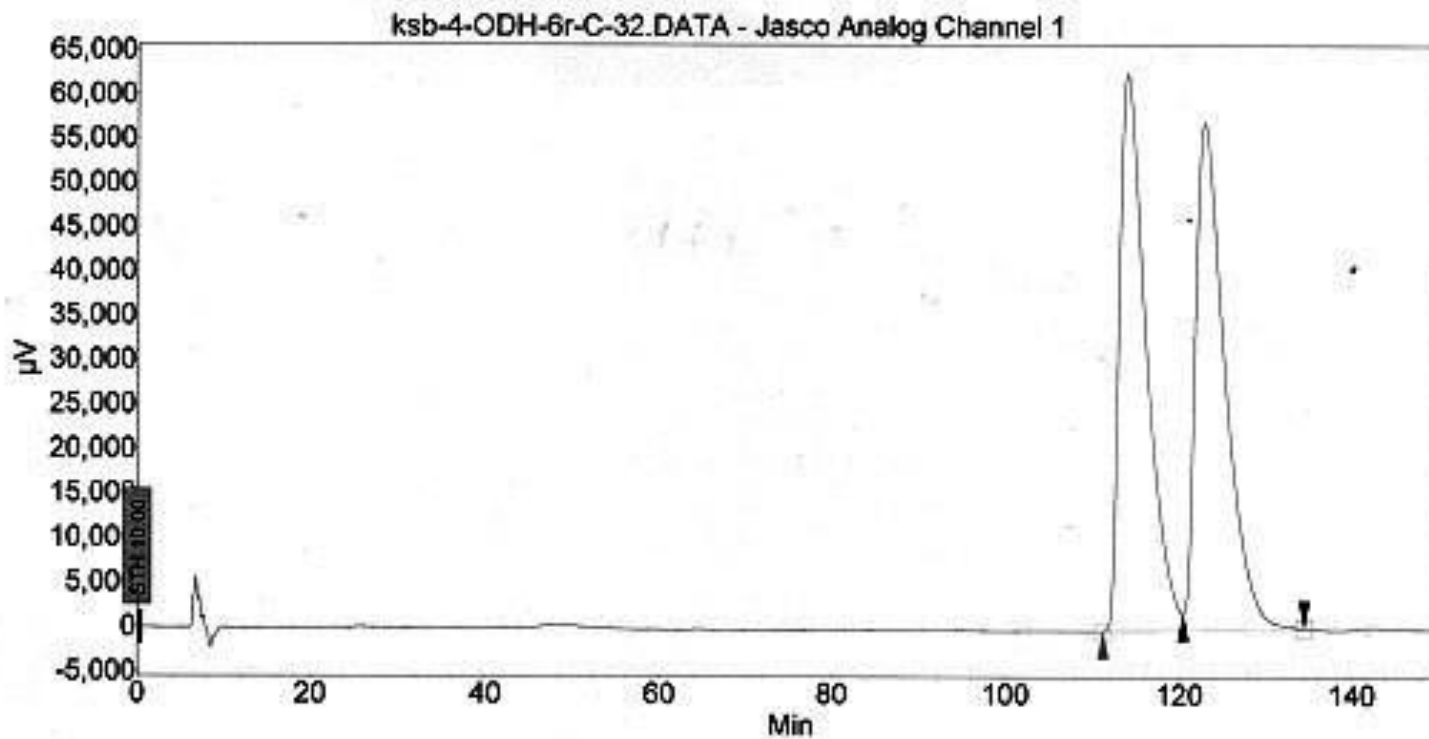

## Peak results :

| Index | Name    | Time [Min] | Quantity [% Area] | Height [μV] | Area [μV.Min] | Area % [%] |
|-------|---------|------------|-------------------|-------------|---------------|------------|
| 1     | UNKNOWN | 113.967    | 49.89             | 62674.4     | 224137.4      | 49.886     |
| 2     | UNKNOWN | 122.750    | 50.11             | 57072.5     | 225158.7      | 50.114     |
| Total |         |            | 100.00            | 119746.9    | 449296.1      | 100.000    |

Fig S21. HPLC Profile of Racemic 3d

# Chromatogram : ksb-4-ODH-2r-B-63\_channel4

System : Jasco HPLC

Method : ksb-10%-05f-250nm

User : User1

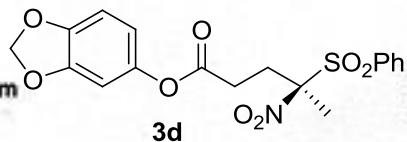

Acquired : 5/9/2013 5:22:14 PM

Processed : 5/9/2013 8:42:22 PM

Printed : 5/9/2013 8:50:00 PM

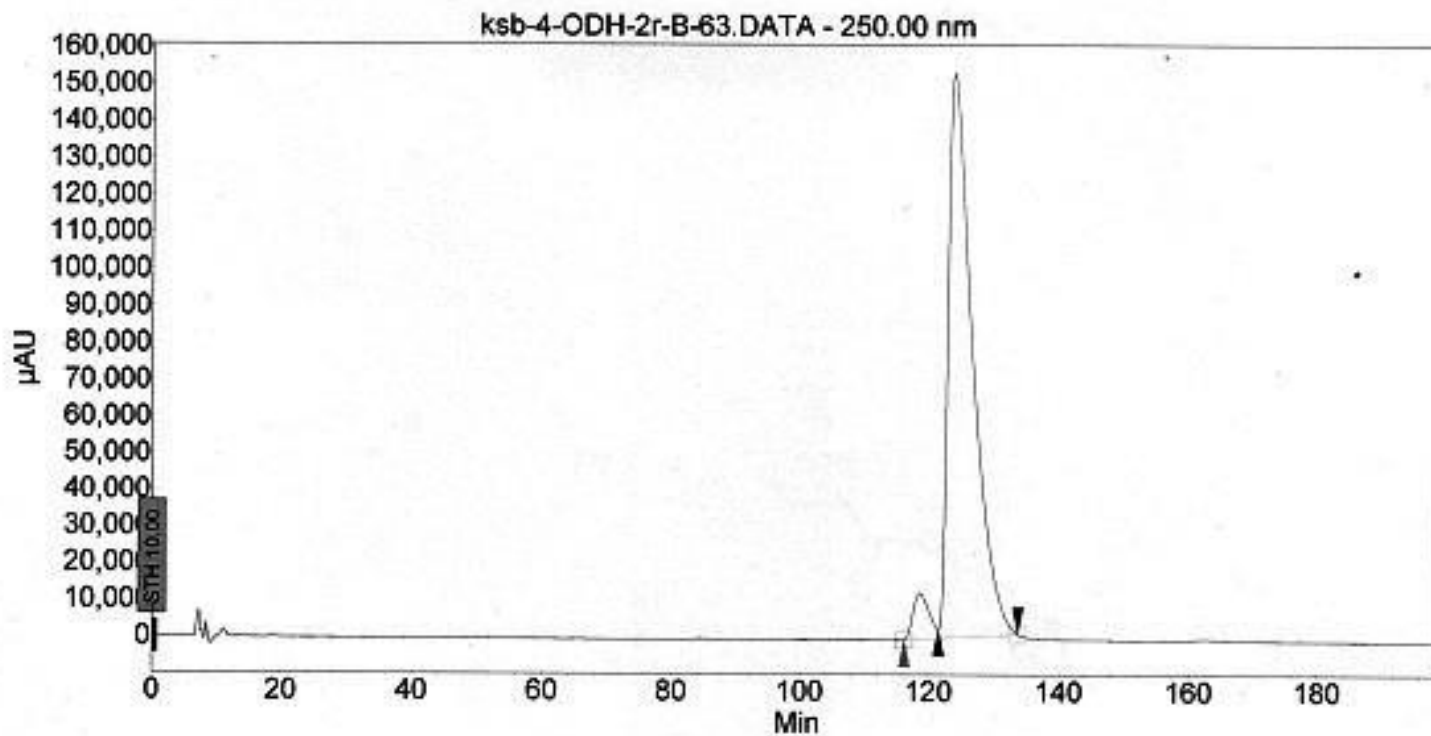

## Peak results :

| Index | Name    | Time [Min] | Quantity [% Area] | Height [µAU] | Area [µAU.Min] | Area % [%] |
|-------|---------|------------|-------------------|--------------|----------------|------------|
| 1     | UNKNOWN | 118.583    | 5.07              | 12373.5      | 35355.6        | 5.071      |
| 2     | UNKNOWN | 123.778    | 94.93             | 152848.8     | 661919.6       | 94.929     |
| Total |         |            | 100.00            | 165222.3     | 697275.3       | 100.000    |

Fig S 22. HPLC Profile of Enantioenriched 3d

NAME INN-3-KSB-T0A-1H  
 EXPNO 4  
 PROCNO 1  
 Date\_ 20130518  
 Time 17.34  
 INSTRUM spect  
 PROBHD 5 mm PABBO BB-  
 PULPROG zg30  
 TD 65536  
 SOLVENT CDCl3  
 NS 6  
 DS 0  
 SMH 8223.685 Hz  
 FIDRES 0.125483 Hz  
 AQ 3.9846387 sec  
 RG 32  
 DM 60.800 usec  
 DE 6.50 usec  
 TE 293.5 K  
 D1 1.00000000 sec  
 T00 1

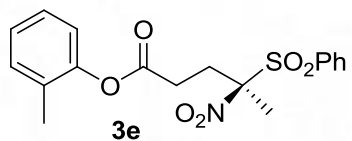

===== CHANNEL f1 =====  
 NUC1 1H  
 p1 13.50 usec  
 PL1 -1.00 dB  
 PL1W 10.56200695 W  
 SFO1 400.1324710 MHz  
 SI 32768  
 SF 400.1300095 MHz  
 WDW EM  
 SSB 0  
 LB 0.30 Hz  
 GB 0  
 PC 1.00

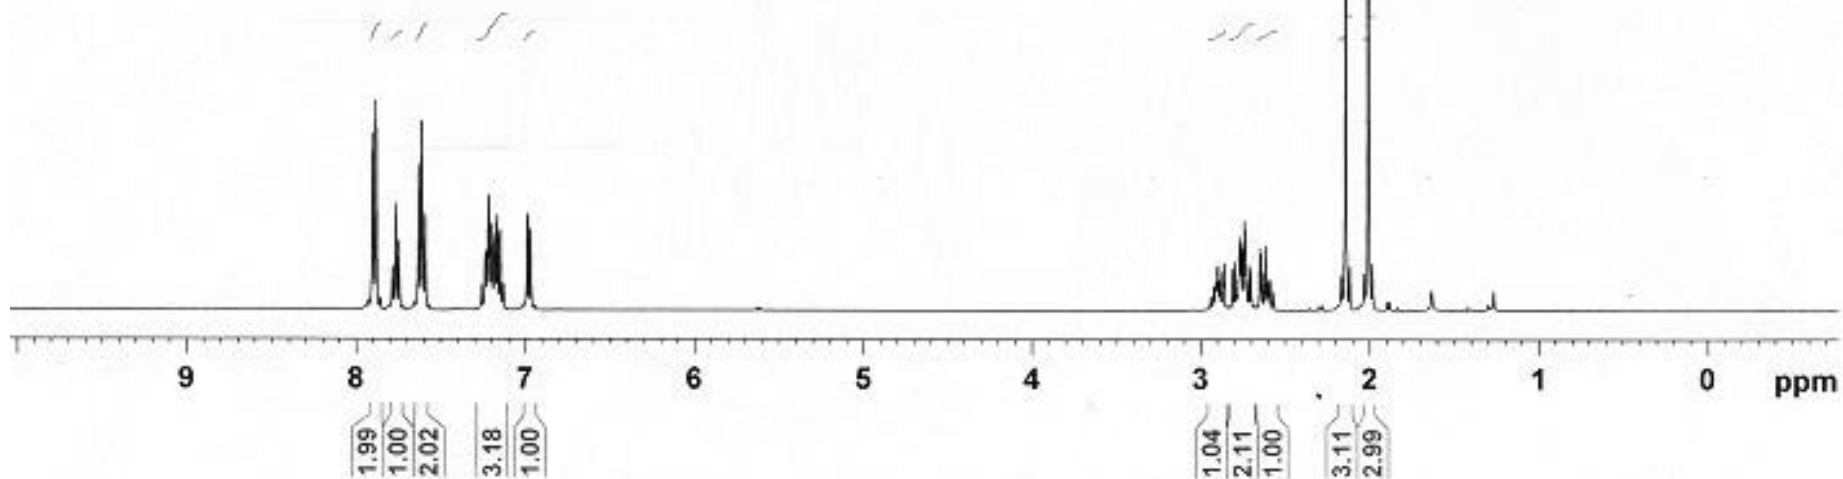

Fig S23. <sup>1</sup>H NMR Spectrum of 3e

```

NAME      INN-3-KSB-70A-13C
EXPNO     4
PROCNO    1
Date_     20130518
Time      17.38
INSTRUM   spect
PROBHD    5 mm PABBO BB-
POLPROG   zgpg30
TD        65536
SOLVENT   CDCl3
NS        44
DS        4
SWH       24038.461 Hz
FIDRES    0.366798 Hz
AQ        1.3631988 sec
RG        2050
DM        20.800 usec
DE        6.50 usec
TE        293.9 K
D1        1.00000000 sec
D11       0.03000000 sec
TDO       1

```

169.51  
 149.06  
 135.67  
 132.45  
 131.34  
 131.16  
 129.92  
 129.44  
 127.13  
 126.44  
 121.71  
 105.96  
 77.52  
 77.20  
 76.88  
 28.92  
 28.56  
 17.38  
 16.27

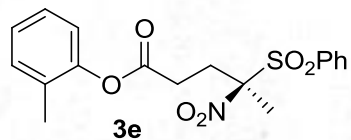

```

----- CHANNEL f1 -----
NUC1      13C
P1        8.75 usec
PL1       -2.00 dB
PL1W      56.53121948 W
SFO1      100.6228290 MHz

```

```

===== CHANNEL f2 =====
CFPPRG2   waltz16
NUC2      1H
PCPD2     80.00 usec
PL2       -1.00 dB
PL12      14.50 dB
PL13      14.50 dB
PL2W      10.56200695 W
PL12W     0.29767781 W
PL13W     0.29767781 W
SFO2      400.1316005 MHz
SI        32768
SF        100.6127618 MHz
WDW       EM
SSB       0
LB        1.00 Hz
GB        0
PC        1.40

```

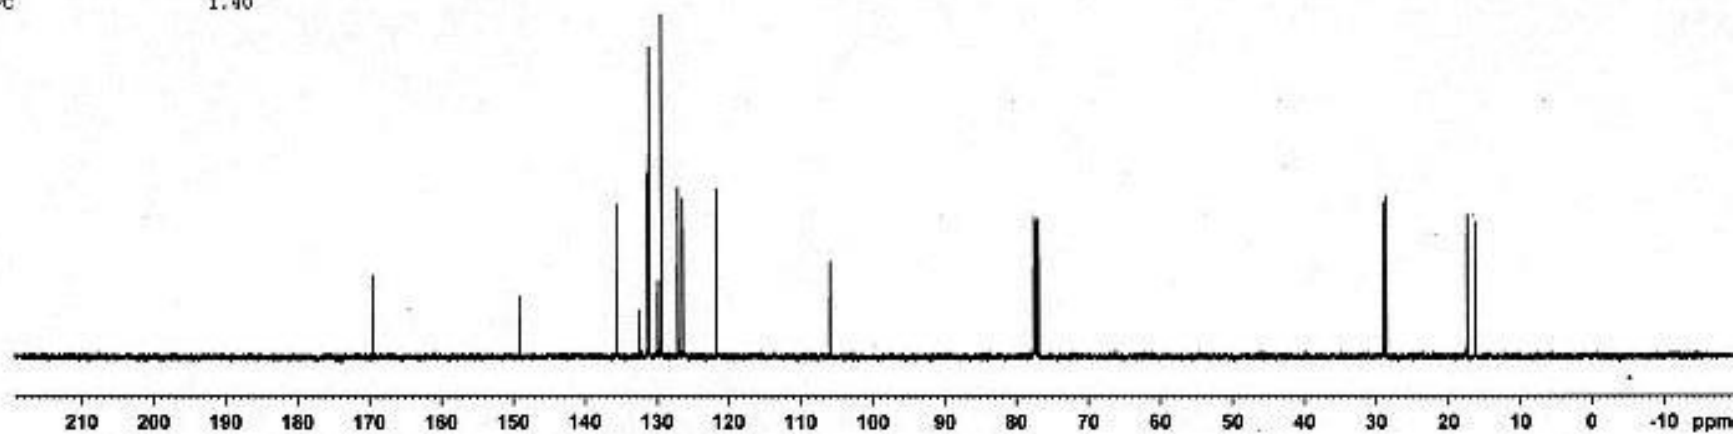

Fig S24. <sup>13</sup>C NMR Spectrum of 3e

# Chromatogram : ksb-4-ADH-1r-A-70\_channel5

System : Jasco HPLC  
 Method : ksb-2%-05f-250nm  
 User : User1

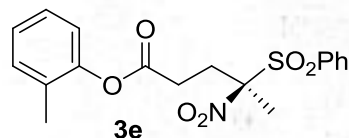

Acquired : 5/25/2013 9:59:25 AM  
 Processed : 5/25/2013 11:54:48 AM  
 Printed : 5/25/2013 11:55:13 AM

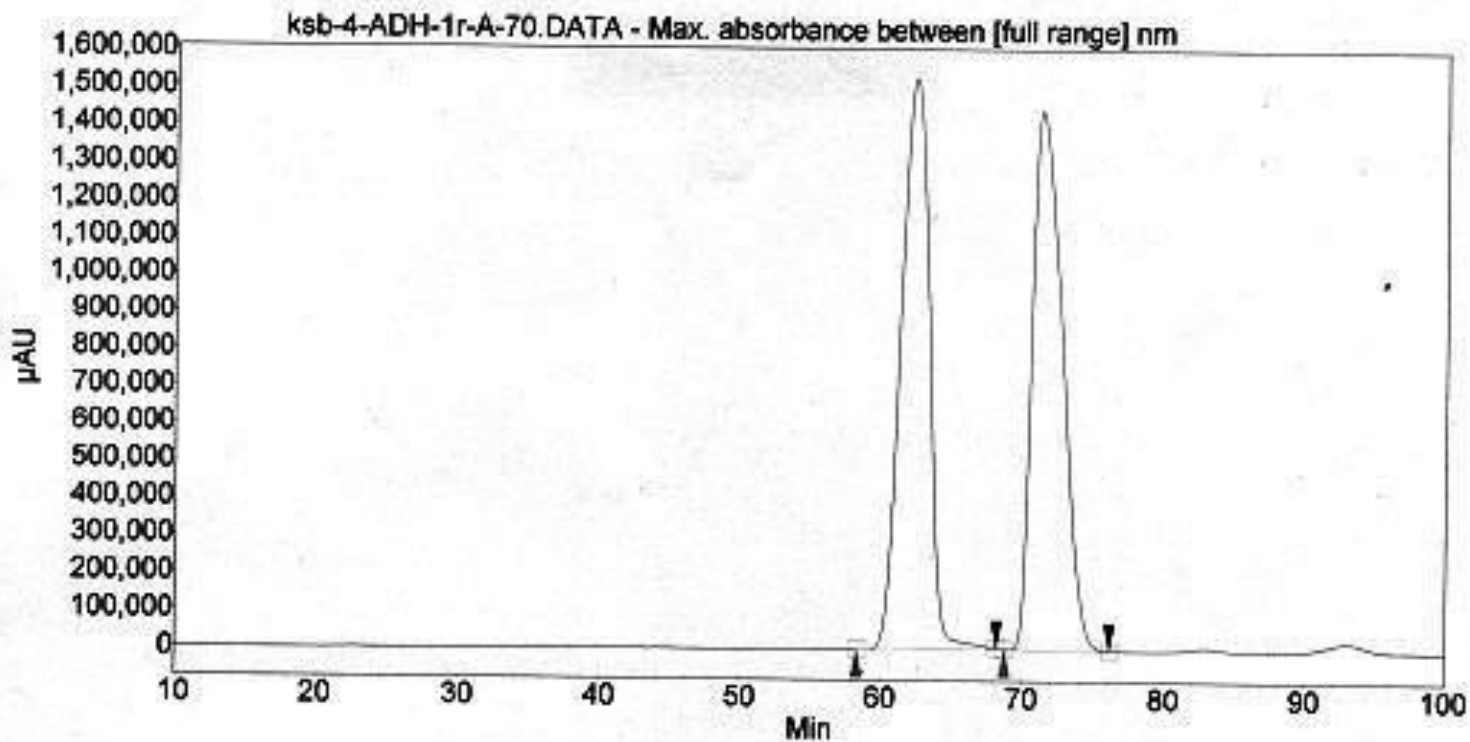

## Peak results :

| Index | Name    | Time [Min] | Quantity [% Area] | Height [μAU] | Area [μAU.Min] | Area % [%] |
|-------|---------|------------|-------------------|--------------|----------------|------------|
| 2     | UNKNOWN | 62.244     | 50.08             | 1522952.0    | 3534512.9      | 50.083     |
| 1     | UNKNOWN | 71.188     | 49.92             | 1438794.1    | 3522794.1      | 49.917     |
| Total |         |            | 100.00            | 2961746.1    | 7057307.0      | 100.000    |

Fig S25. HPLC Profile of Racemic 3e

# Chromatogram : ksb-4-ADH-1r-A-69\_channel2

System : Jasco HPLC  
 Method : ksb-2%-05f-250nm  
 User : User1

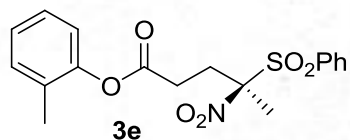

Acquired : 5/25/2013 11:41:02 AM  
 Processed : 5/25/2013 1:20:25 PM  
 Printed : 5/25/2013 1:20:37 PM

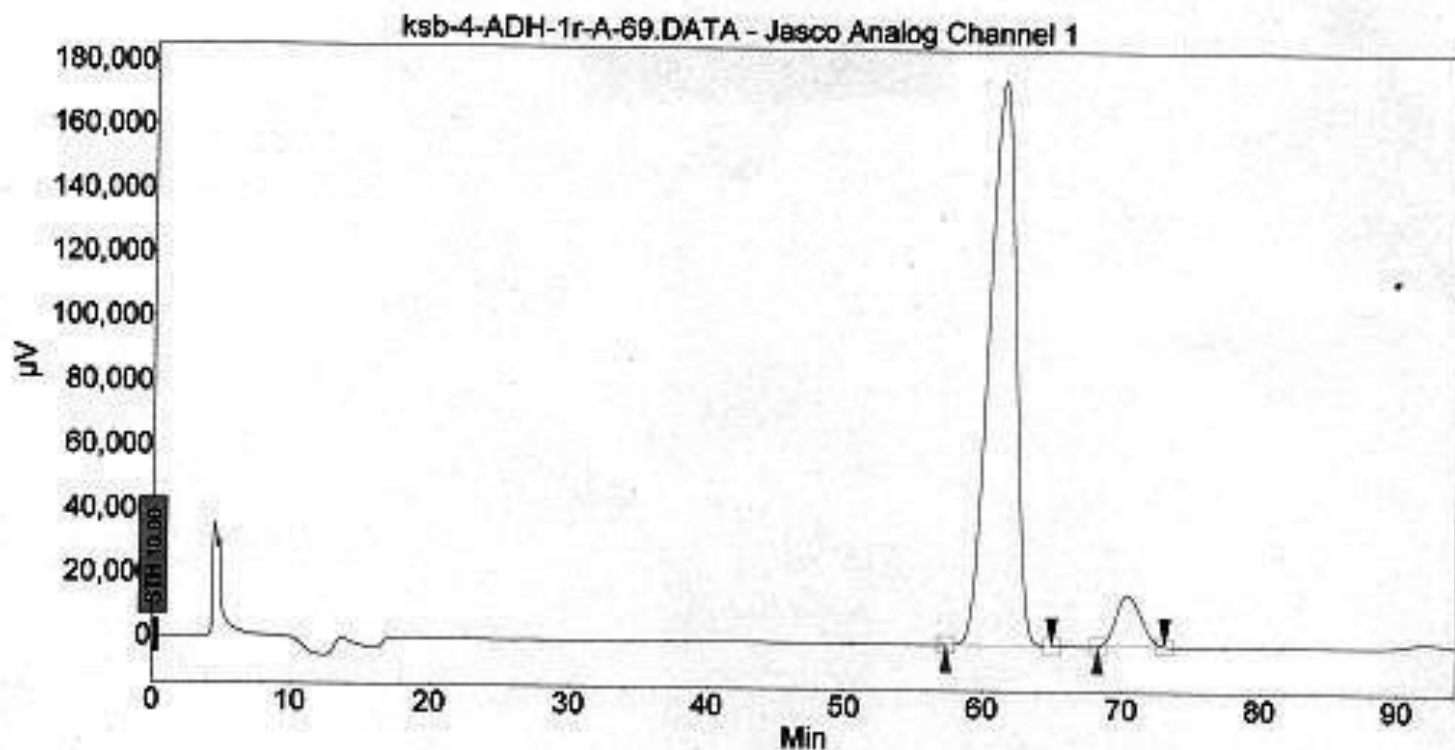

## Peak results :

| Index | Name    | Time [Min] | Quantity [% Area] | Height [µV] | Area [µV.Min] | Area % [%] |
|-------|---------|------------|-------------------|-------------|---------------|------------|
| 2     | UNKNOWN | 61.242     | 92.10             | 176430.2    | 380455.0      | 92.102     |
| 1     | UNKNOWN | 70.333     | 7.90              | 16185.6     | 33484.3       | 7.898      |
| Total |         |            | 100.00            | 182615.9    | 423939.3      | 100.000    |

Fig S26. HPLC Profile of Enantioenriched 3e

NAME INN-4-KSB-33A-1H  
EXPNO 2  
PROCNO 1  
Date\_ 20130223  
Time\_ 18.35  
INSTRUM spect  
PROBHD 5 mm PABBO BB-  
PULPROG zg30  
TD 65536  
SOLVENT CDC13  
NS 16  
DS 0  
SWH 8223.685 Hz  
FIDRES 0.125483 Hz  
AQ 3.9846387 sec  
RG 32  
DW 60.800 usec  
DE 6.50 usec  
TE 293.7 K  
D1 1.00000000 sec  
TD0 1

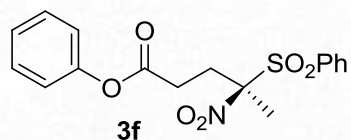

===== CHANNEL f1 =====  
NUC1 1H  
P1 13.50 usec  
PL1 -1.00 dB  
PL1W 10.56200695 W  
SFO1 400.1324710 MHz  
SI 32768  
SF 400.1300095 MHz  
WDW EM  
SSB 0  
LB 0.30 Hz  
GB 0  
PC 1.00

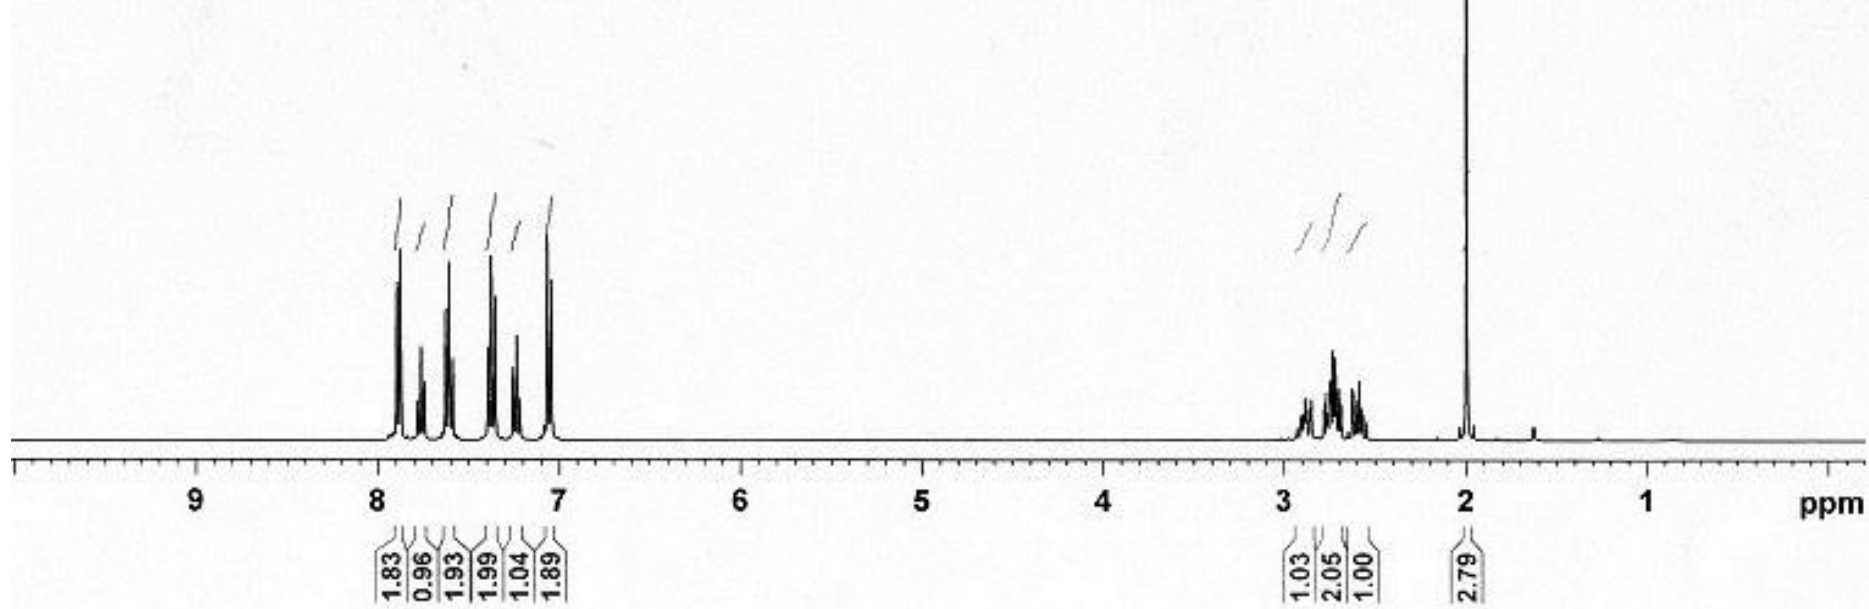

Fig S27. <sup>1</sup>H NMR Spectrum of 3f

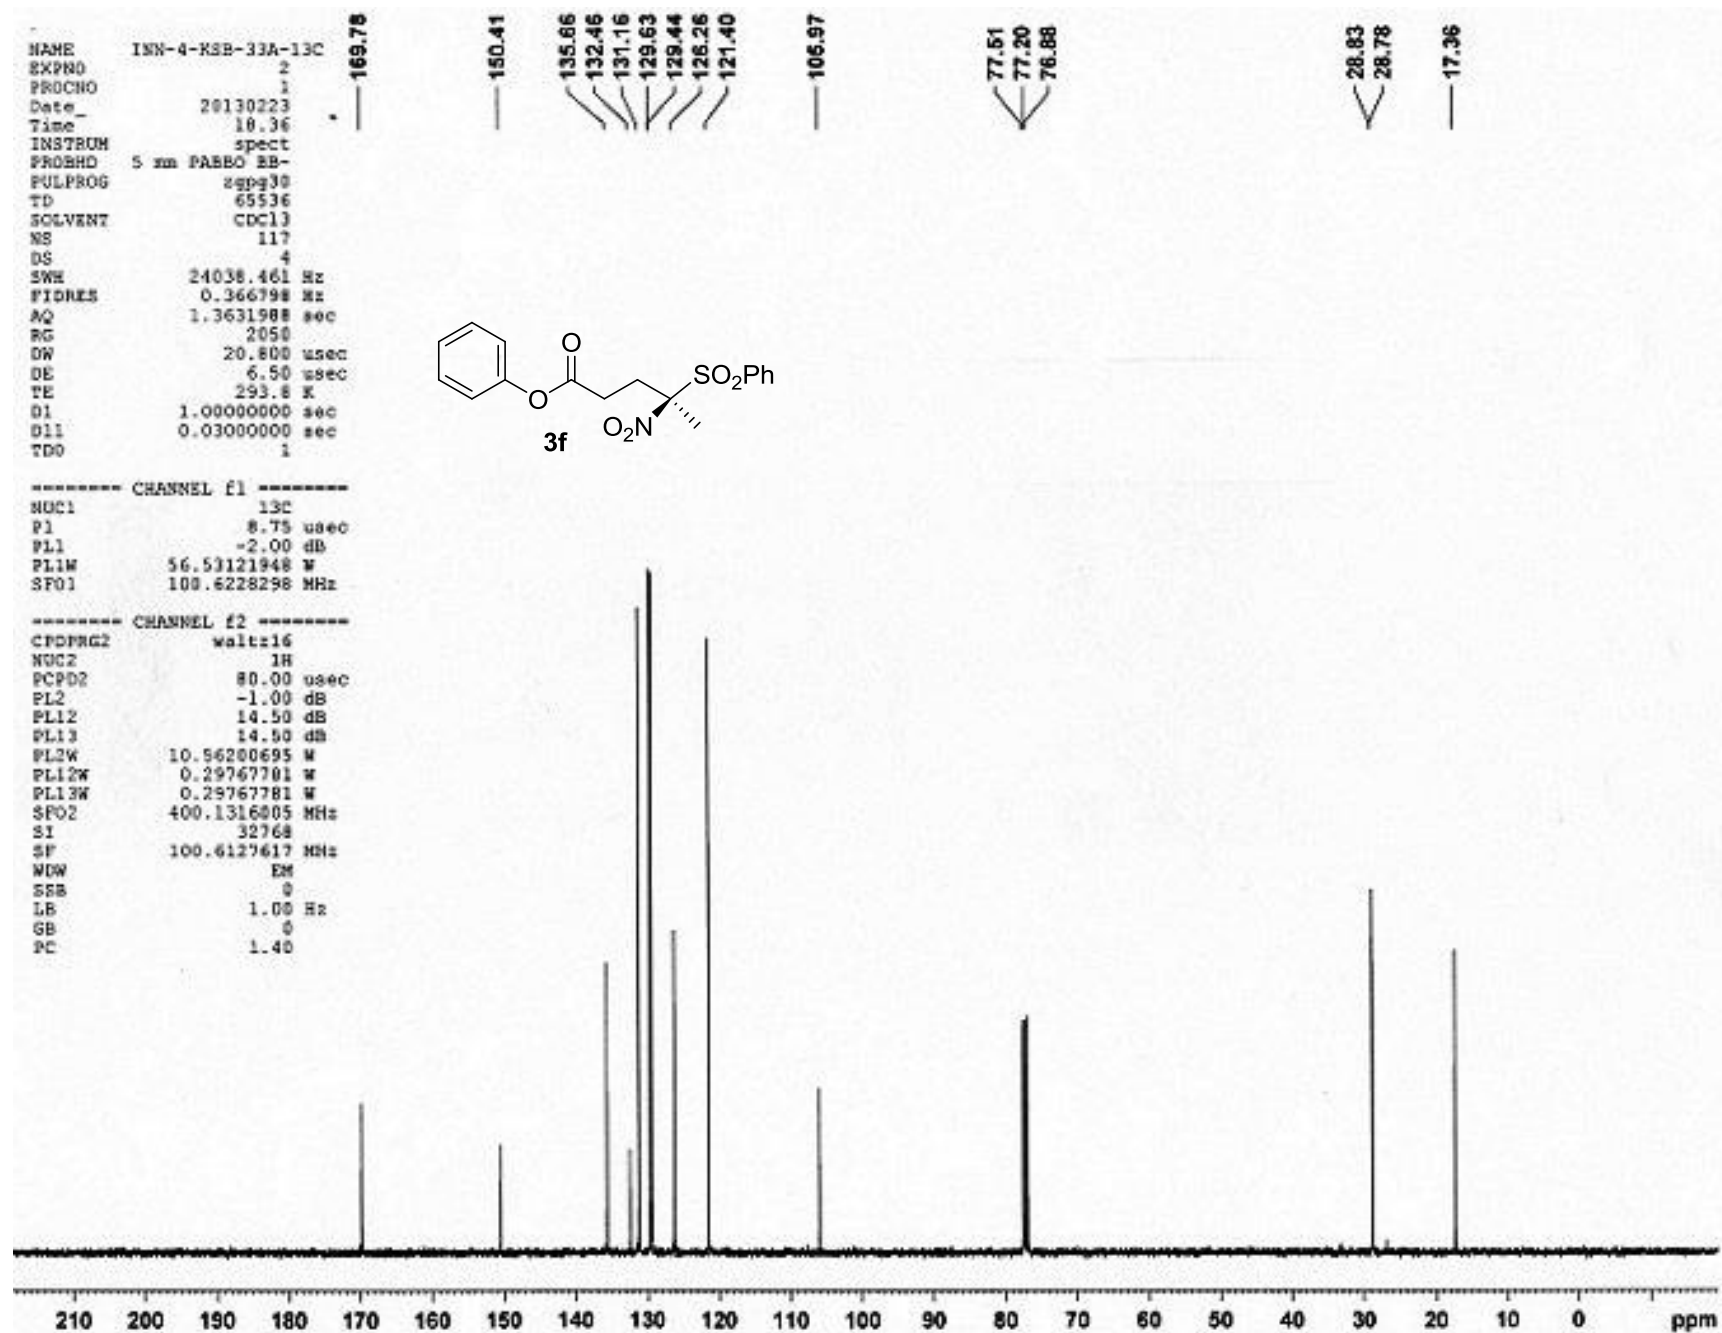

Fig S28. <sup>13</sup>C NMR Spectrum of 3f



# Chromatogram : ksb-4-CE1-2R-A-33\_channel2

System : JASCO HPLC  
Method : ksb-5-05f-258  
User : User1

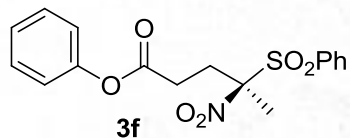

Acquired : 5/30/2013 1:52:06 PM  
Processed : 5/30/2013 4:10:58 PM  
Printed : 5/30/2013 4:12:22 PM

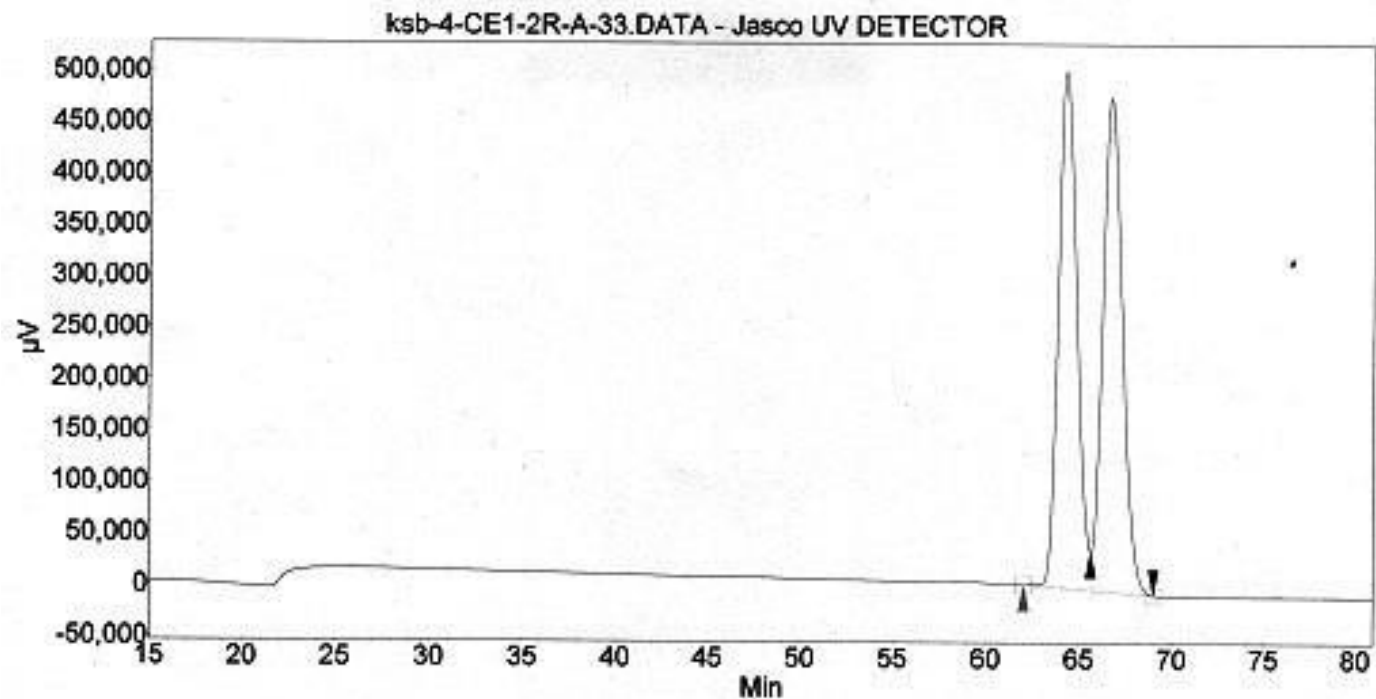

## Peak results :

| Index | Name    | Time [Min] | Quantity [% Area] | Height [μV] | Area [μV.Min] | Area % [%] |
|-------|---------|------------|-------------------|-------------|---------------|------------|
| 1     | UNKNOWN | 64.225     | 49.31             | 502032.8    | 575801.8      | 49.308     |
| 2     | UNKNOWN | 66.642     | 50.69             | 480330.3    | 591766.9      | 50.692     |
| Total |         |            | 100.00            | 982363.2    | 1167368.7     | 100.000    |

Fig S29. HPLC Profile of Racemic 3f

## Chromatogram : ksb-4-CE-2R-A-61\_channel2

System : JASCO HPLC  
Method : ksb-5-054-258  
User : User1

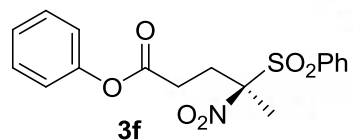

Acquired : 5/30/2013 4:35:20 PM  
Processed : 5/30/2013 5:52:09 PM  
Printed : 5/30/2013 5:58:20 PM

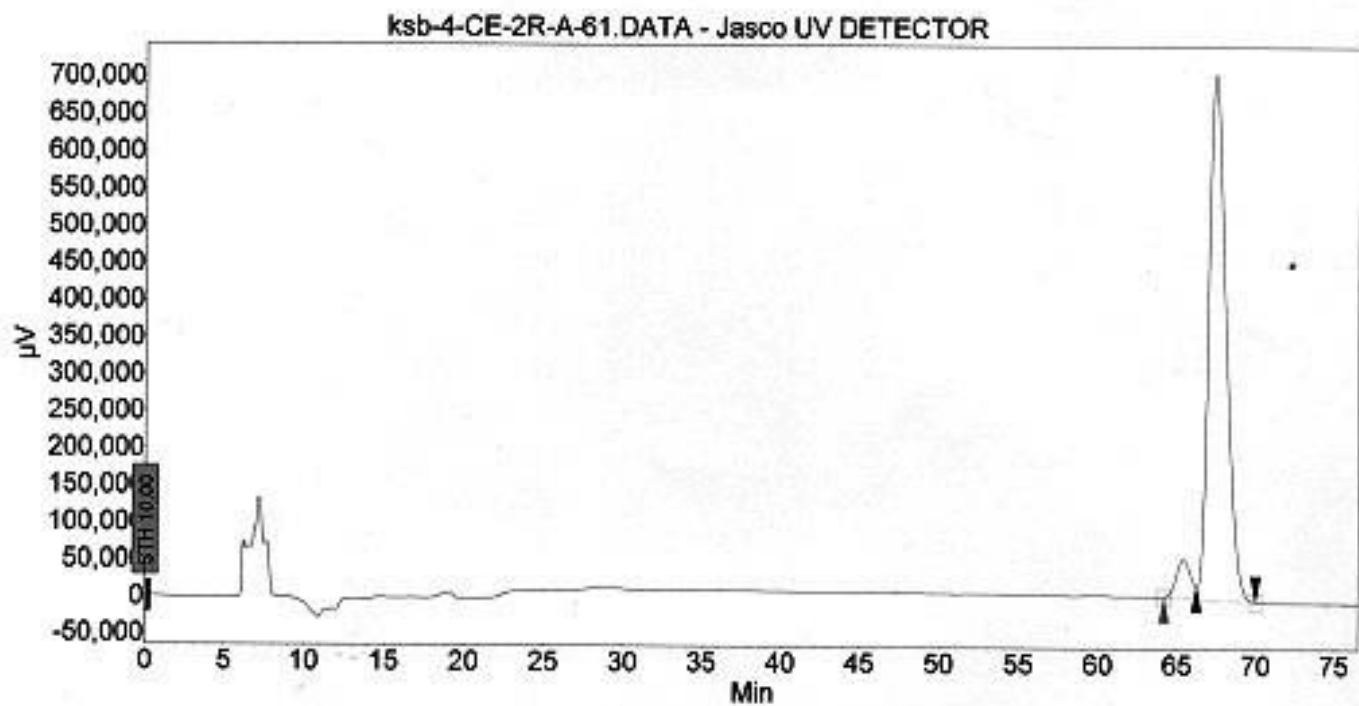

### Peak results :

| Index | Name    | Time (Min) | Quantity (% Area) | Height [µV] | Area [µV.Min] | Area % (%) |
|-------|---------|------------|-------------------|-------------|---------------|------------|
| 1     | UNKNOWN | 65.358     | 5.71              | 51790.2     | 54436.8       | 5.710      |
| 2     | UNKNOWN | 67.358     | 94.29             | 705410.2    | 888949.0      | 94.290     |
| Total |         |            | 100.00            | 757200.4    | 953385.9      | 100.000    |

Fig S30. HPLC Profile of Enantioenriched 3f

```

NAME      INN-4-KSB-42B-1H
EXPNO     13
PROCNO    1
Date_     20130314
Time      8.01
INSTRUM   spect
PROBHD    5 mm PABBO BB-
PULPROG   zg30
TD        65536
SOLVENT   CDCl3
NS        13
DS        0
SWH       8223.685 Hz
FIDRES    0.125463 Hz
AQ        3.9846367 sec
RG        32
DW        60.800 usec
DE        6.50 usec
TE        292.1 K
D1        1.00000000 sec
TD0       1

```

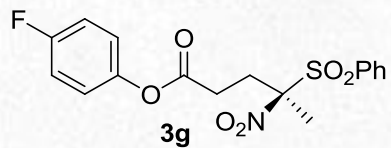

```

===== CHANNEL f1 =====
NUC1      1H
P1        13.50 usec
PL1       -1.00 dB
PL1W      10.56200695 W
SFO1      400.1324710 MHz
SI        32768
SF        400.1300095 MHz
WDW       EM
SSB       0
LB        0.30 Hz
GB        0
PC        1.00

```

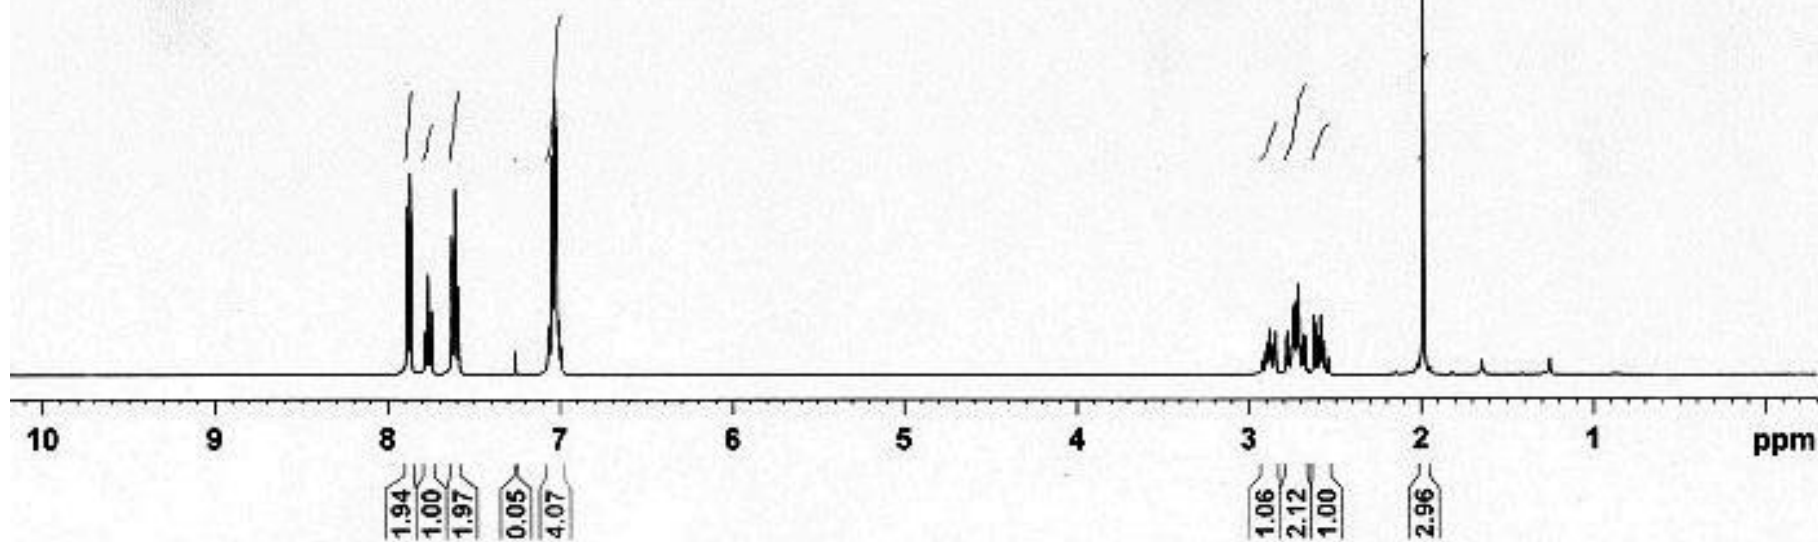

Fig S31. <sup>1</sup>H NMR Spectrum of 3g

```

NAME      INN-4-KSB-42B-13C
EXPNO     14
PROCNO    1
Date_     20130314
Time      8.05
INSTRUM   spect
PROBHD    5 mm PABBO BB-
PULPROG   zgpg30
TD         65536
SOLVENT   CDCl3
NS         100
DS         4
SWH       24038.461 Hz
FIDRES    0.366798 Hz
AQ         1.3631988 sec
RG         2050
DM         20.800 usec
DE         6.50 usec
TE         292.8 K
D1         1.00000000 sec
D11        0.03000000 sec
TDO        1

```

```

===== CHANNEL f1 =====
NUC1      13C
P1        8.75 usec
PL1       -2.00 dB
PL1W      56.53121940 W
SFO1      100.6228298 MHz

```

```

===== CHANNEL f2 =====
CPDPRG2   waltz16
NUC2      1H
PCPD2     80.00 usec
PL2       -1.00 dB
PL12      14.50 dB
PL13      14.50 dB
PL2W      10.56200695 W
PL12W     0.29767781 W
PL13W     0.29767781 W
SFO2      400.1316005 MHz
SI         32768
SF         100.6127605 MHz
WDW        EM
SSB         0
LB         1.00 Hz
GB         0
EC         1.40

```

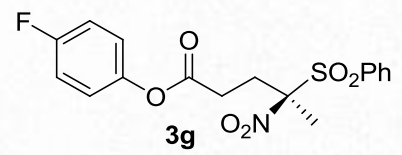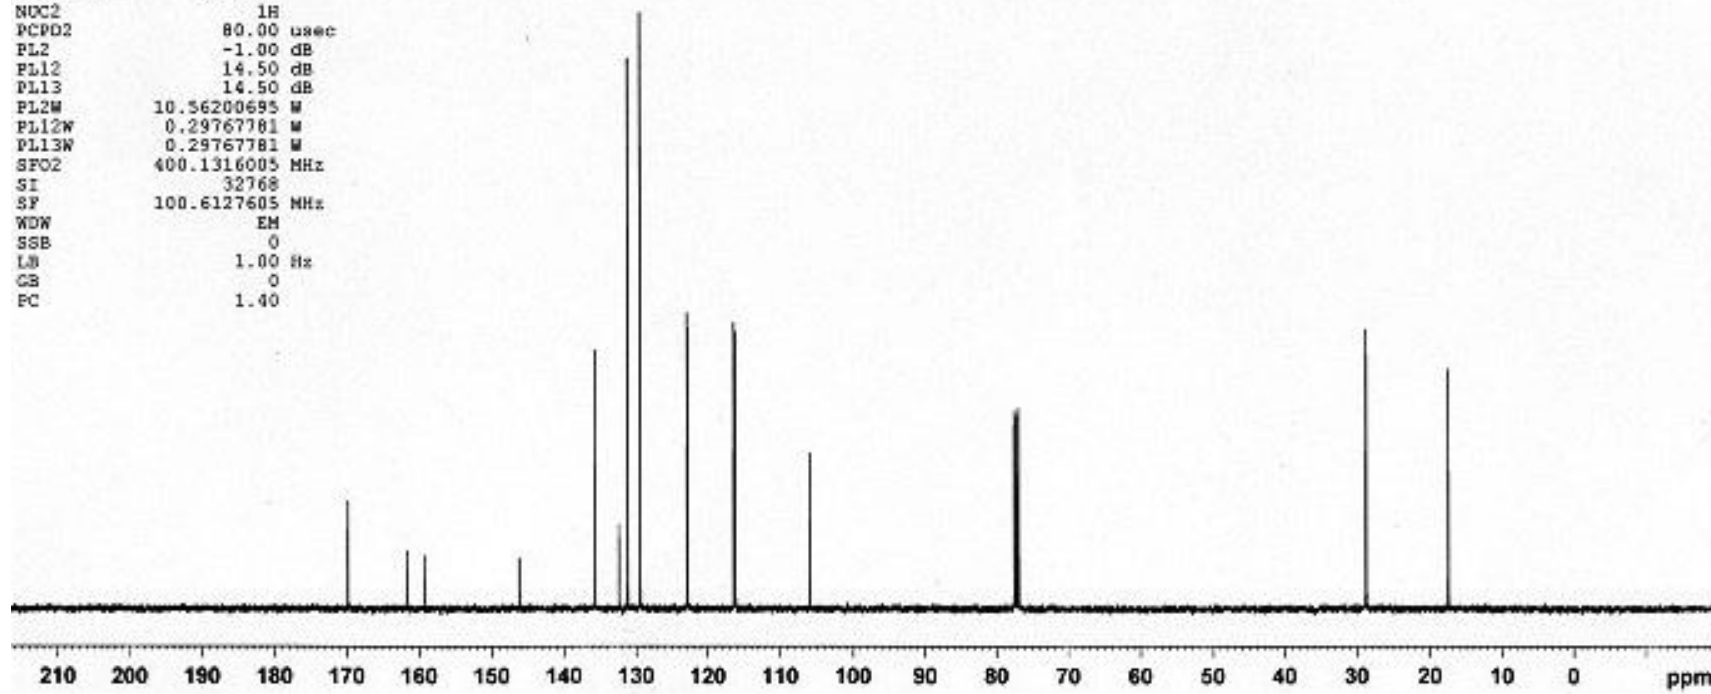

Fig S32. <sup>13</sup>C NMR Spectrum of 3g

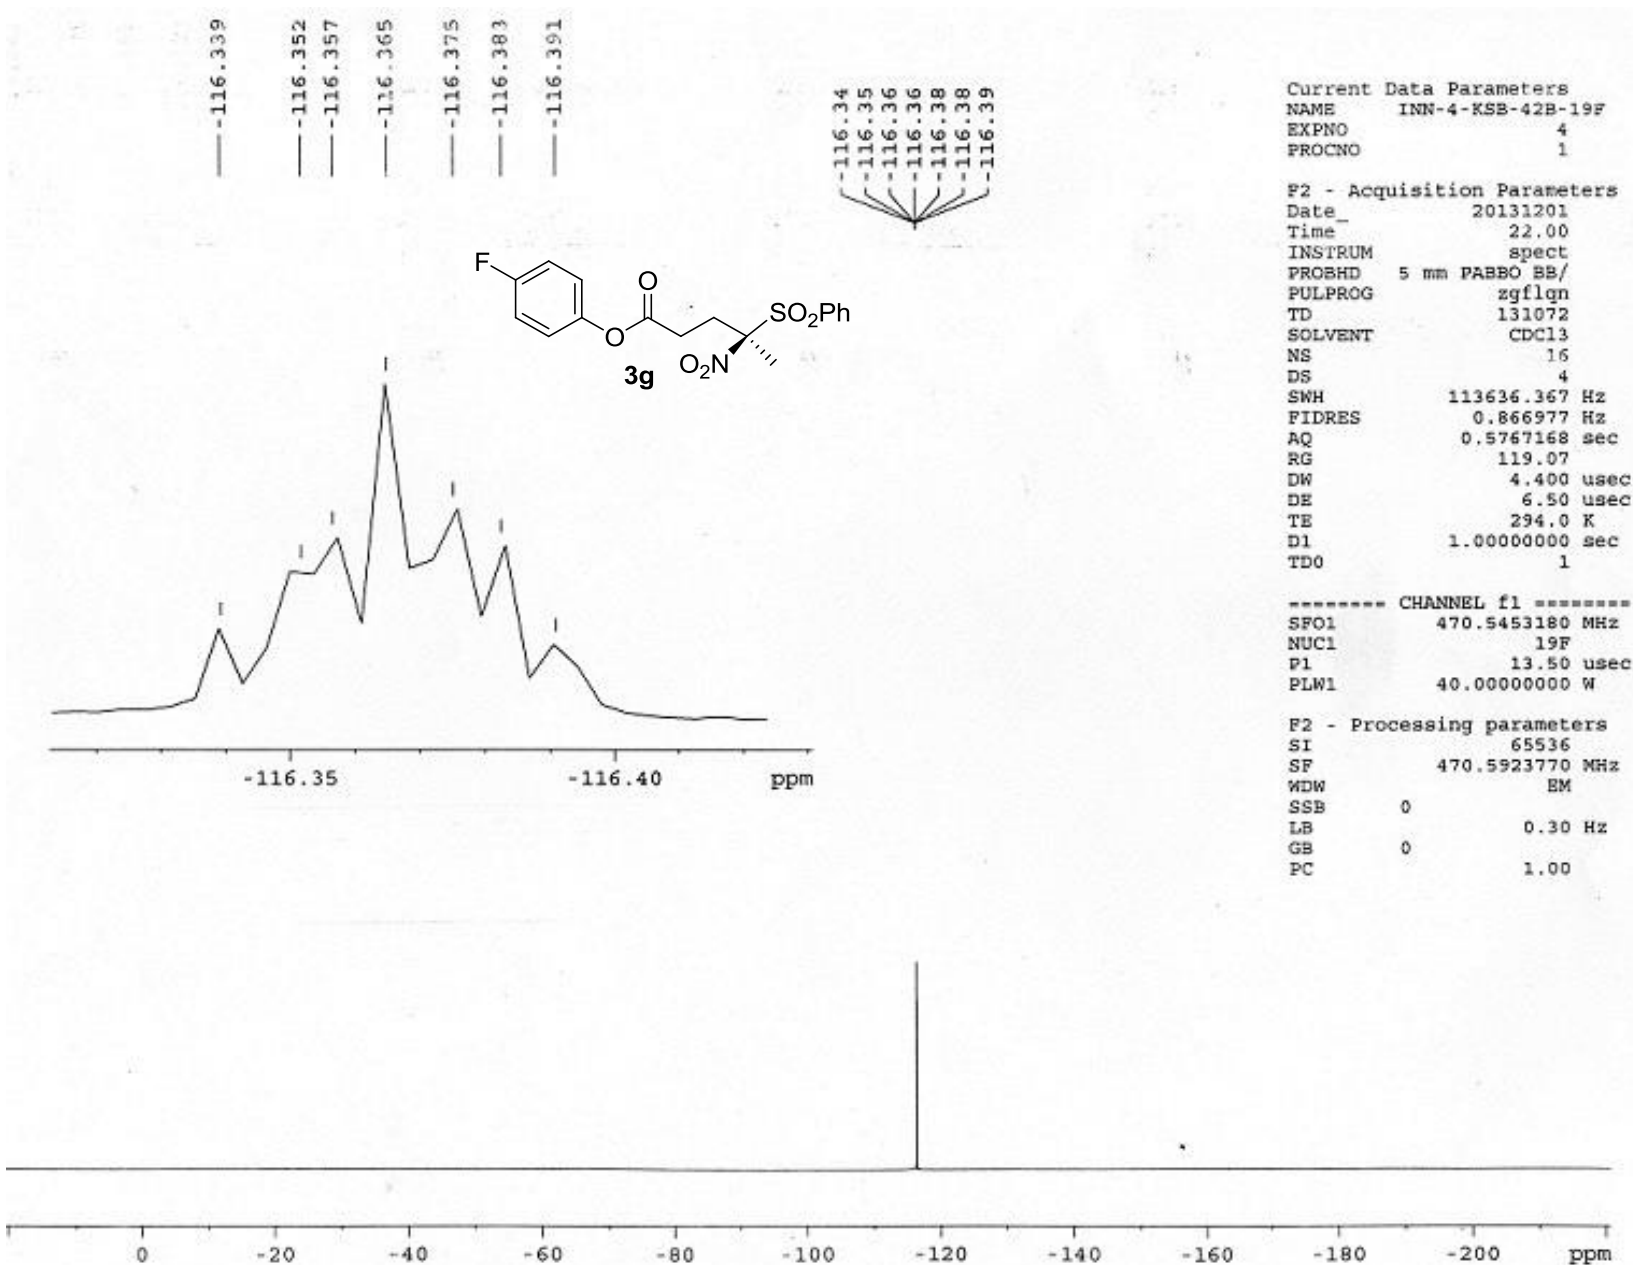

Fig S33. <sup>19</sup>F NMR Spectrum of 3g

# Chromatogram : ksb-4-ODH-2R-B-42\_channel4

System : Jasco HPLC  
 Method : ksb-10%-05f-250nm  
 User : User1

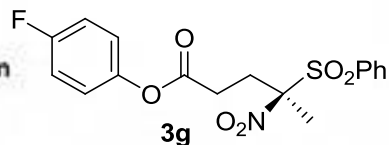

Acquired : 5/16/2013 4:03:38 PM  
 Processed : 5/16/2013 5:08:25 PM  
 Printed : 5/16/2013 5:08:31 PM

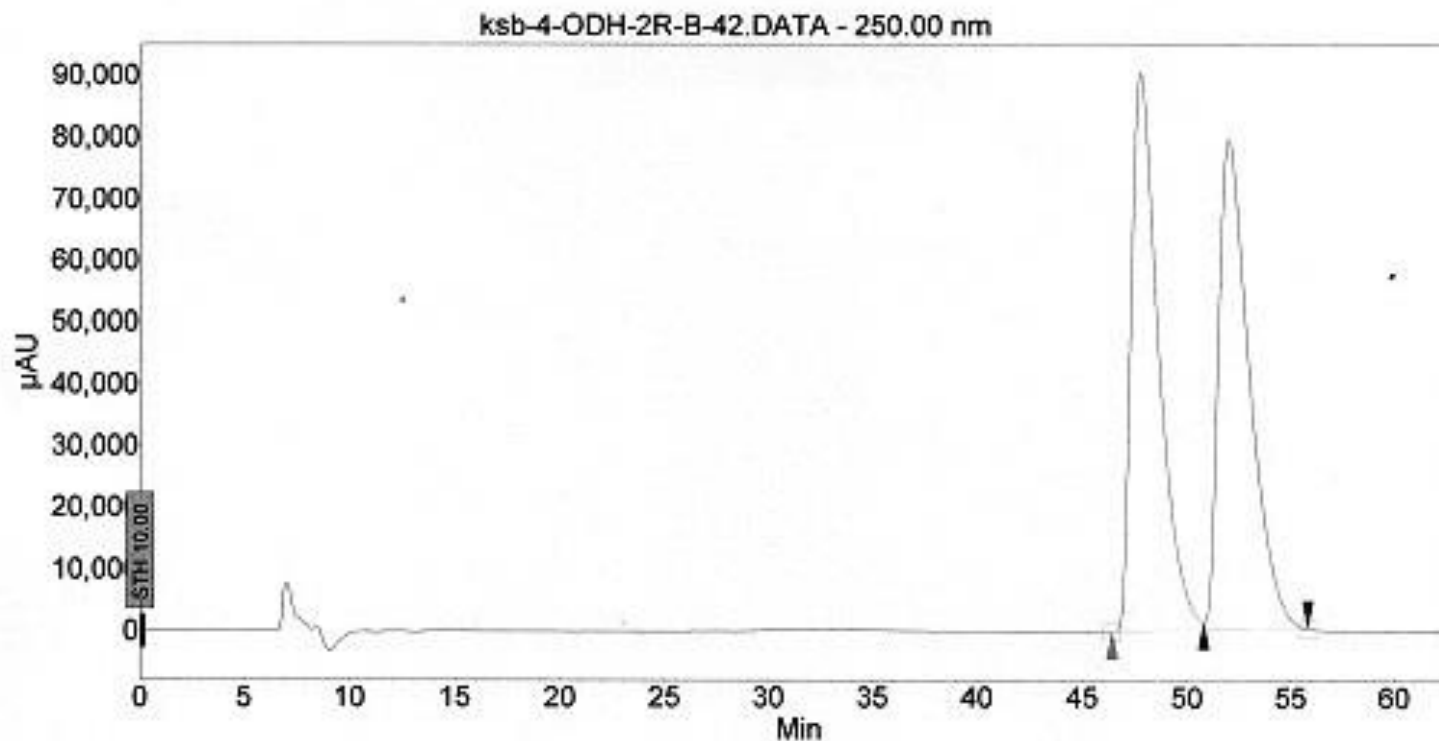

## Peak results :

| Index | Name    | Time [Min] | Quantity [% Area] | Height [μAU] | Area [μAU.Min] | Area % [%] |
|-------|---------|------------|-------------------|--------------|----------------|------------|
| 1     | UNKNOWN | 47.730     | 49.91             | 90311.0      | 137059.7       | 49.912     |
| 2     | UNKNOWN | 51.956     | 50.09             | 79491.6      | 137543.5       | 50.088     |
| Total |         |            | 100.00            | 169802.6     | 274603.2       | 100.000    |

Fig S34. HPLC Profile of Racemic 3g

**Chromatogram : ksb-4-ODH-1R-A-66\_channel2**

System : Jasco HPLC  
 Method : ksb-10%-05f-250nm  
 User : User1

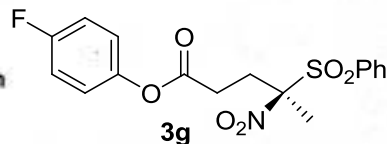

Acquired : 5/16/2013 2:37:35 PM  
 Processed : 5/16/2013 4:05:28 PM  
 Printed : 5/16/2013 4:06:37 PM

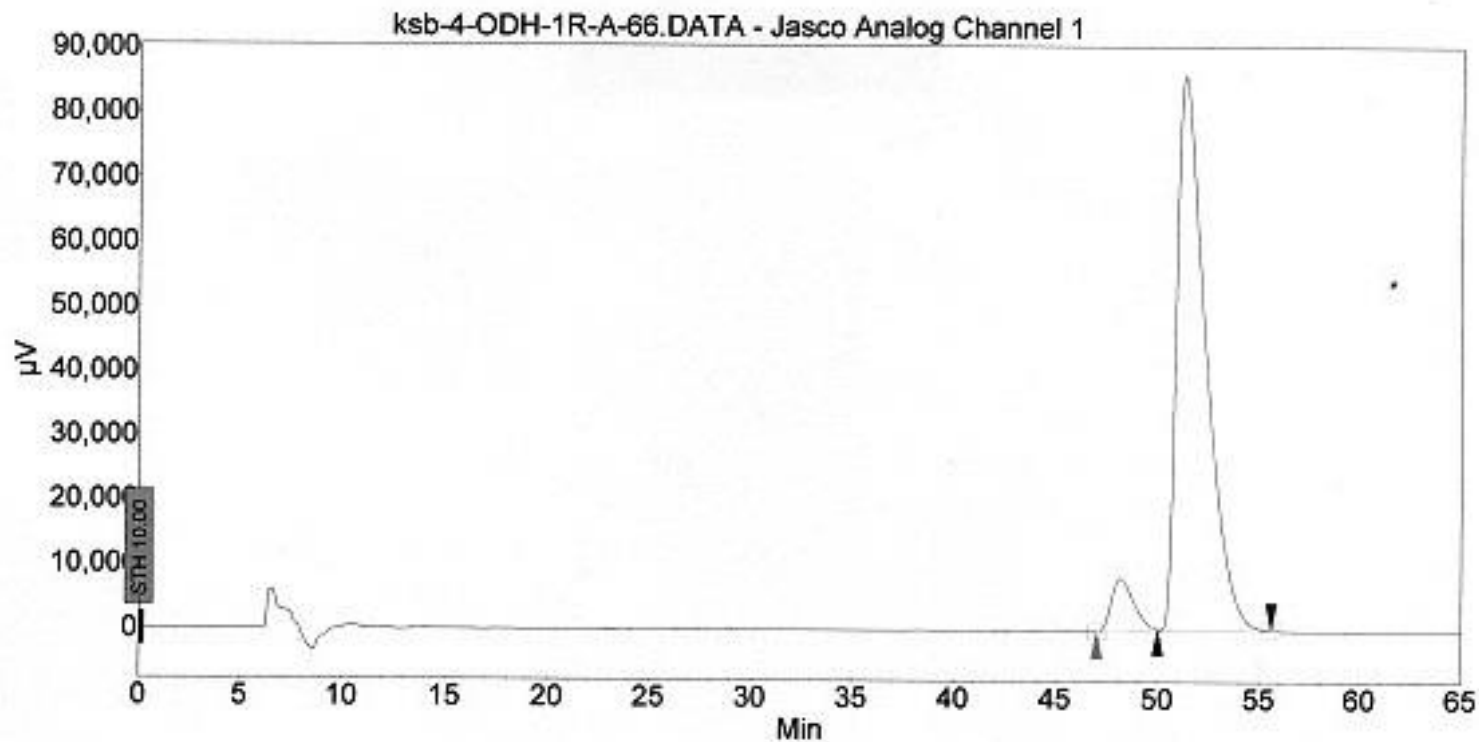

**Peak results :**

| Index | Name    | Time [Min] | Quantity [% Area] | Height [µV] | Area [µV.Min] | Area % [%] |
|-------|---------|------------|-------------------|-------------|---------------|------------|
| 1     | UNKNOWN | 48.158     | 6.80              | 8104.1      | 10416.2       | 6.804      |
| 2     | UNKNOWN | 51.283     | 93.20             | 85829.6     | 142666.3      | 93.196     |
| Total |         |            | 100.00            | 93933.6     | 153082.5      | 100.000    |

Fig S35. HPLC Profile of Enantioenriched 3g

```

NAME      INN-4-KSB-31A-1H
EXPNO     1
PROCNO    1
Date_     20130219
Time      20.53
INSTRUM   spect
PROBHD    5 mm PABBO BB-
PULPROG   zg30
TD        65536
SOLVENT   CDC13
NS        16
DS        0
SWH       8223.685 Hz
FIDRES    0.125483 Hz
AQ        3.9846387 sec
RG        32
DW        60.800 usec
DE        6.50 usec
TE        294.3 K
D1        1.00000000 sec
TDO       1
    
```

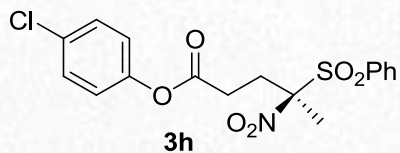

```

===== CHANNEL f1 =====
NUC1      1H
P1        13.50 usec
PL1       -1.00 dB
PL1W      10.56200695 W
SFO1      400.1324710 MHz
SI        32768
SF        400.1300095 MHz
WDW       EM
SSB       0
LB        0.30 Hz
GB        0
PC        1.00
    
```

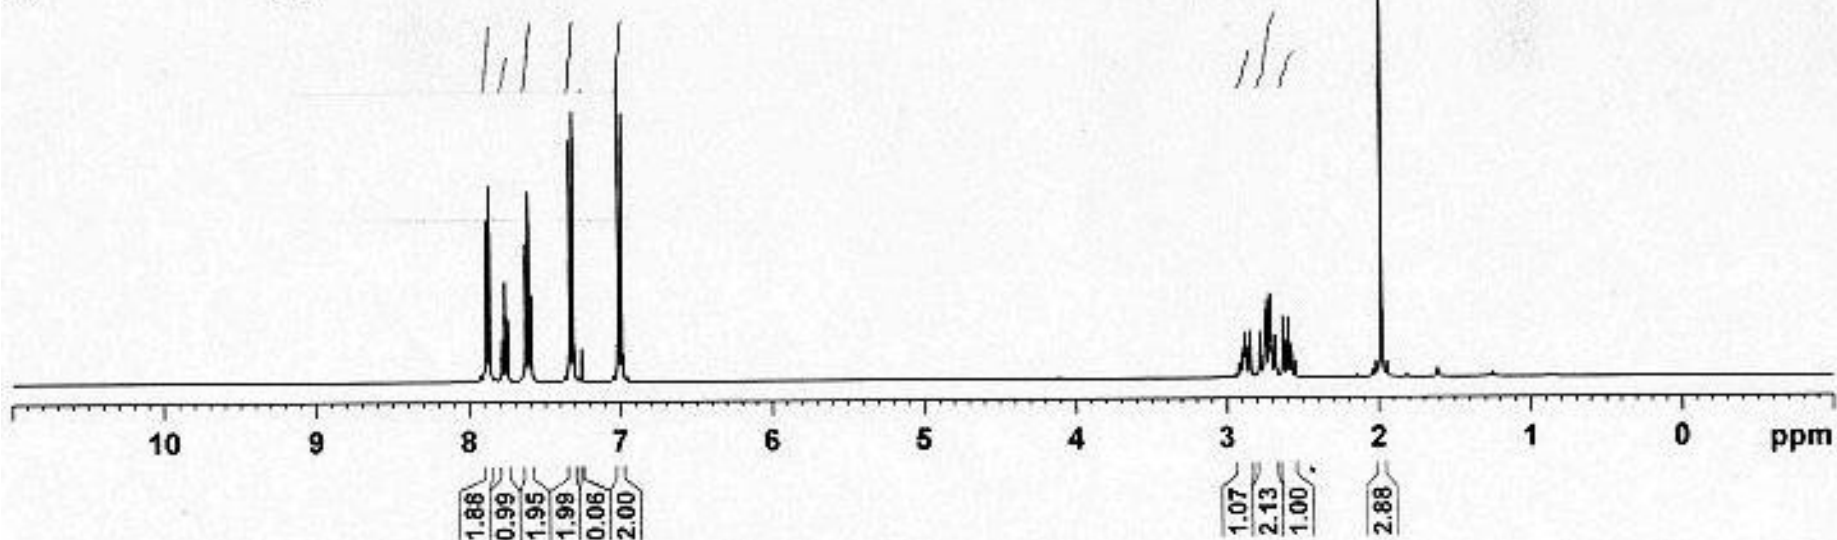



Fig S36. <sup>1</sup>H NMR Spectrum of 3h

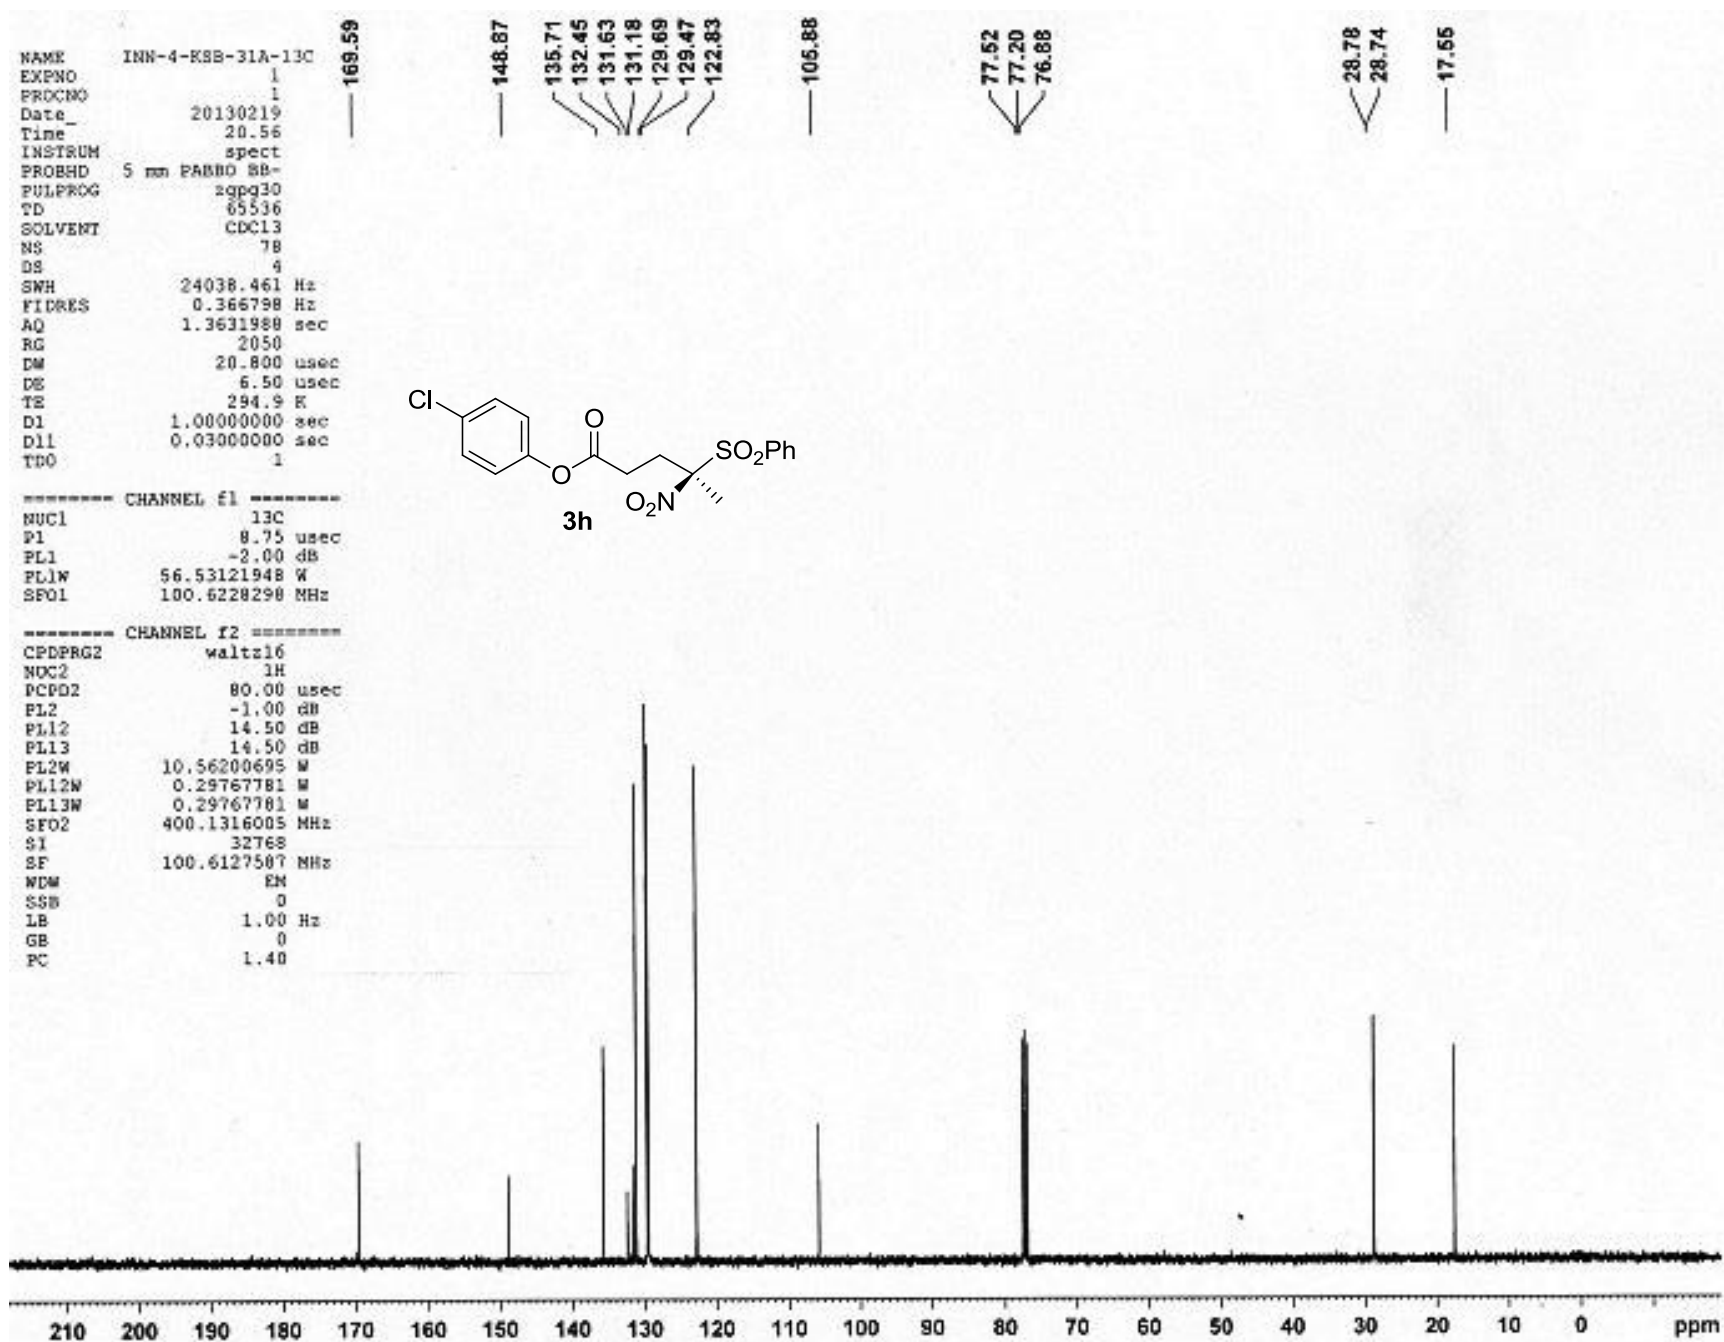

Fig S37. <sup>13</sup>C NMR Spectrum of 3h

Chromatogram : KSB-4-ODH-1R-A-31\_channel5

System : JASCO HPLC  
Method : ksb-5-05f-218  
User : User1

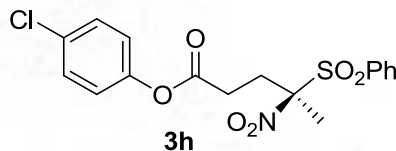

Acquired : 2/27/2013 12:03:55 PM  
Processed : 2/27/2013 1:48:15 PM  
Printed : 2/27/2013 8:47:50 PM

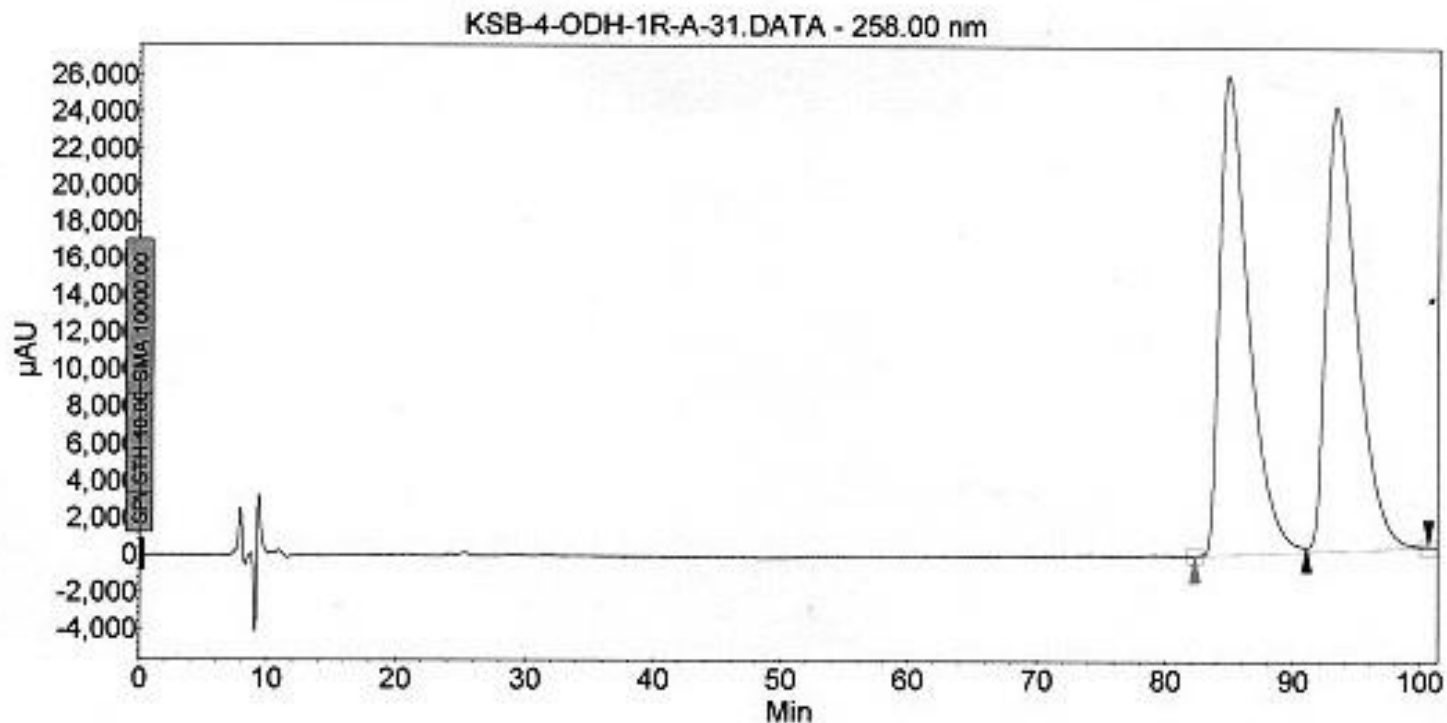

Peak results :

| Index | Name    | Time [Min] | Quantity [% Area] | Height [μAU] | Area [μAU.Min] | Area % [%] |
|-------|---------|------------|-------------------|--------------|----------------|------------|
| 1     | UNKNOWN | 84.836     | 49.99             | 25990.2      | 67368.9        | 49.989     |
| 2     | UNKNOWN | 93.287     | 50.01             | 24081.6      | 67398.6        | 50.011     |
| Total |         |            | 100.00            | 50071.9      | 134767.5       | 100.000    |

Fig S38. HPLC Profile of Racemic 3h

Chromatogram : ksb-4-ODH-2R-B-61\_channel2

System : JASCO HPLC  
 Method : ksb-5-05f-258  
 User : User1

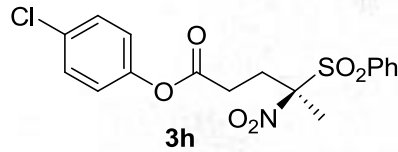

Acquired : 5/6/2013 1:12:44 PM  
 Processed : 5/6/2013 3:12:49 PM  
 Printed : 5/6/2013 10:12:23 PM

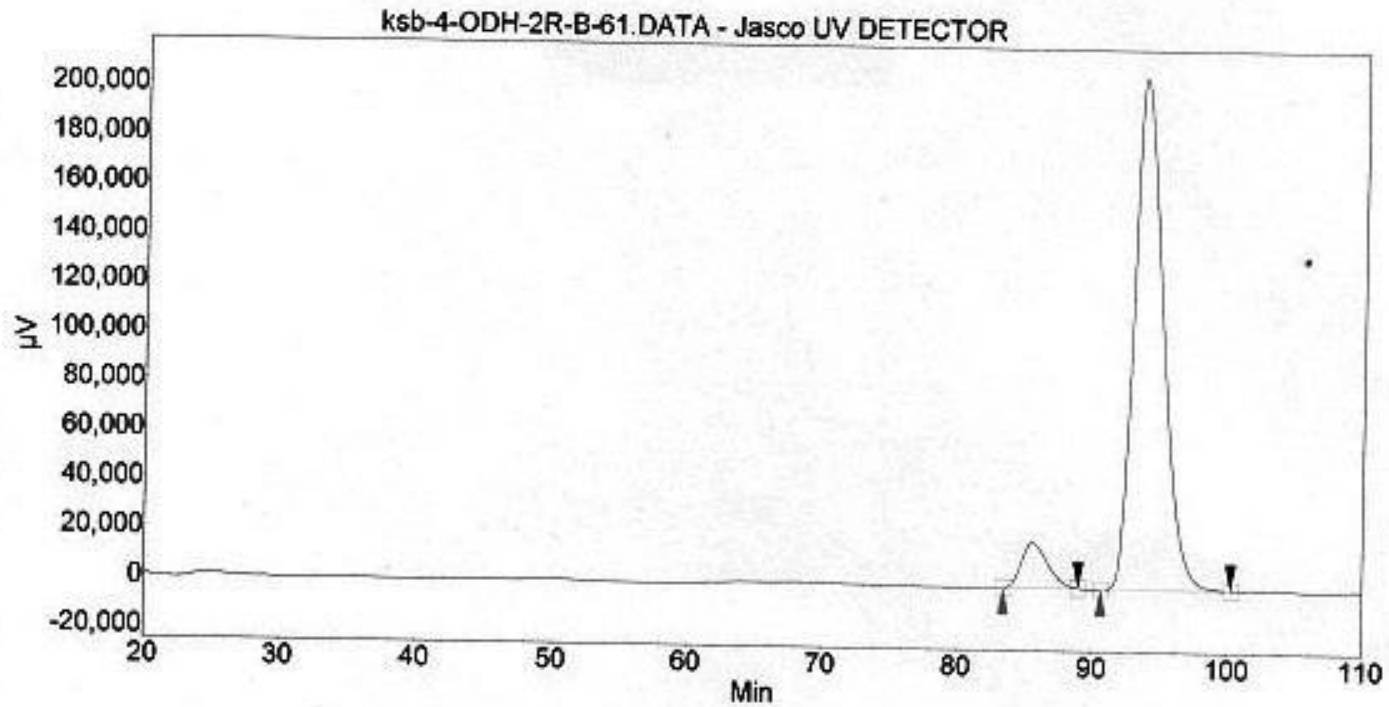

Peak results :

| Index | Name    | Time [Min] | Quantity [% Area] | Height [µV] | Area [µV.Min] | Area % [%] |
|-------|---------|------------|-------------------|-------------|---------------|------------|
| 1     | UNKNOWN | 85.542     | 7.34              | 18254.2     | 40654.9       | 7.344      |
| 2     | UNKNOWN | 93.587     | 92.66             | 206813.3    | 515430.1      | 92.656     |
| Total |         |            | 100.00            | 225067.5    | 556085.1      | 100.000    |

Fig S39. HPLC Profile of Enantioenriched 3h

```

NAME      INN-4-XSB-42A-1H
EXPNO     11
PROCNO    1
Date_     20130314
Time      7.52
INSTRUM   spect
PROBHD    5 mm PABBO BB-
PULPROG   zg30
TD        65536
SOLVENT   CDCl3
NS        16
DS        0
SWH       8223.685 Hz
FIDRES    0.125483 Hz
AQ        3.9846387 sec
RG        101
DM        60.800 usec
DE        6.50 usec
TE        292.1 K
D1        1.0000000 sec
TD0       1
    
```

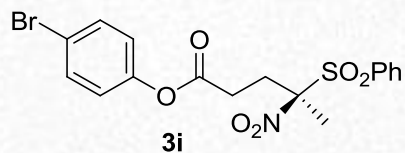

```

===== CHANNEL f1 =====
NUC1      1H
P1        13.50 usec
PL1       -1.00 dB
PL1W      10.56200695 W
SFO1      400.1324710 MHz
SI        32768
SF        400.1300095 MHz
WDW       EM
SSB       0
LB        0.30 Hz
GB        0
PC        1.00
    
```

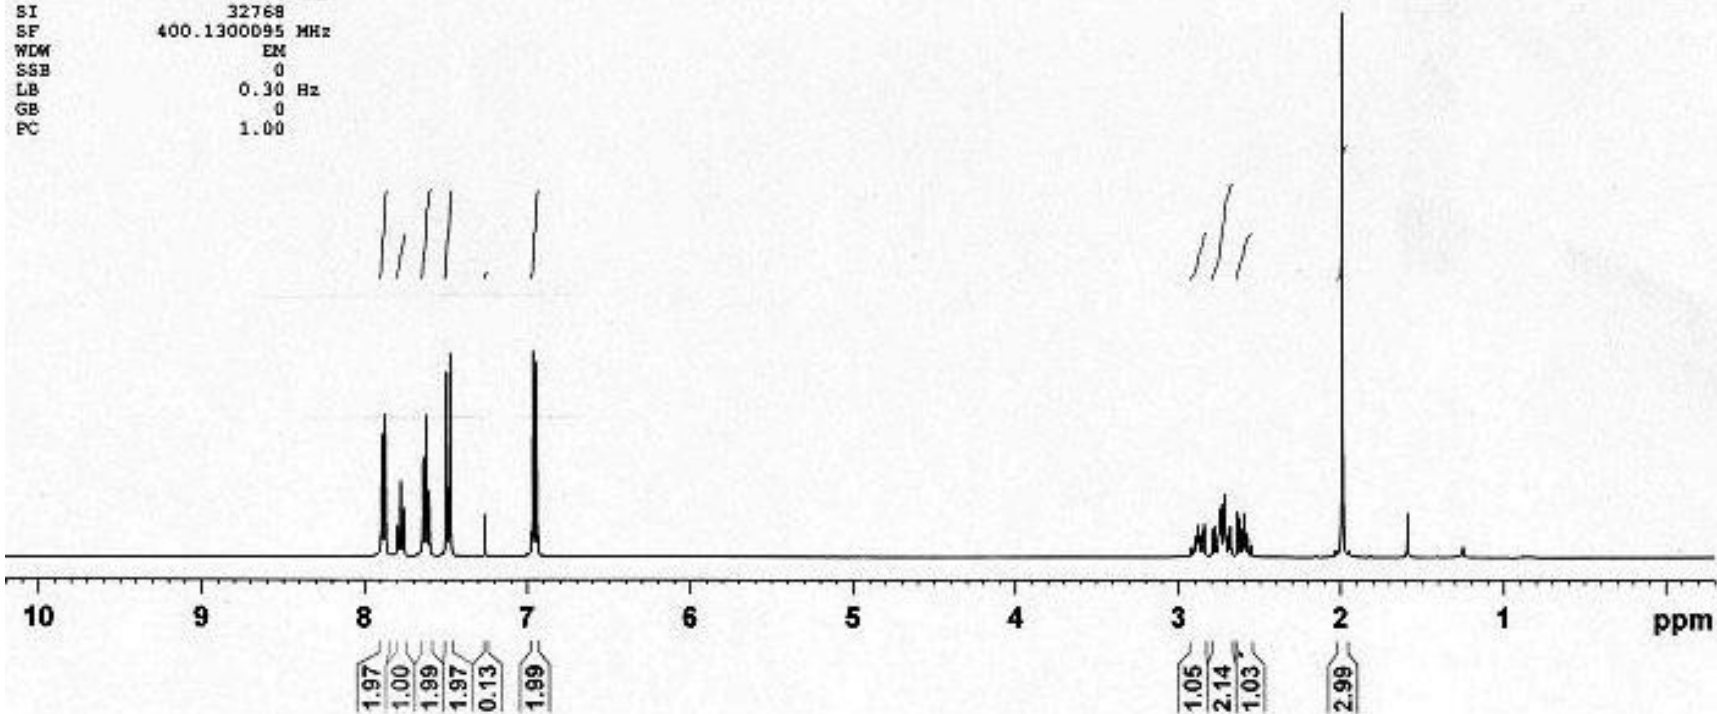

Fig S40. <sup>1</sup>H NMR Spectrum of 3i

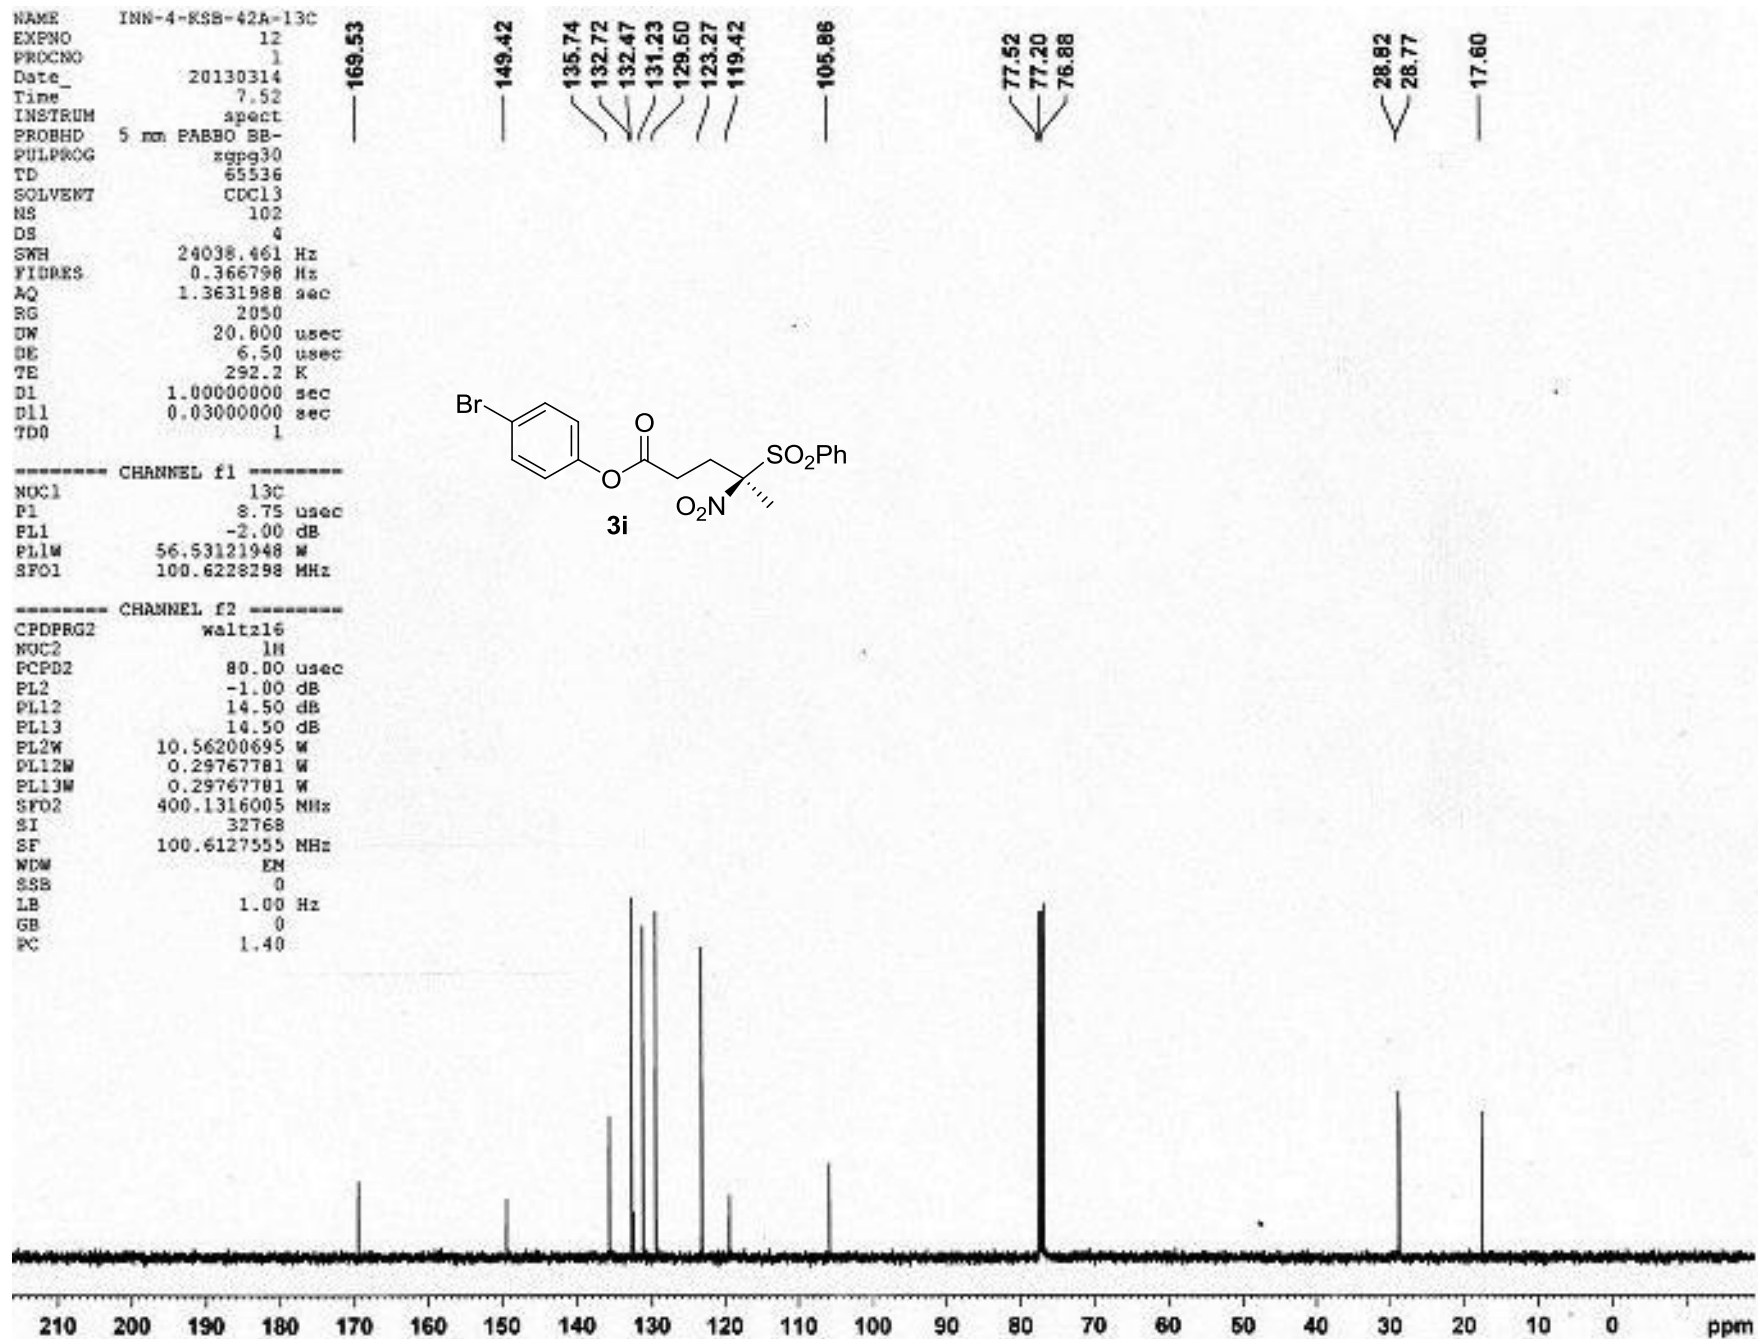

Fig S41. <sup>13</sup>C NMR Spectrum of 3i

Chromatogram : ksb-4-ODH-1R-A-42\_channel4

System : Jasco HPLC

Method : ksb-10%-05f-250nm

User : User1

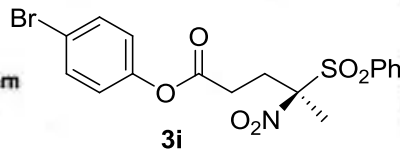

Acquired : 3/14/2013 3:01:18 PM

Processed : 3/14/2013 4:35:26 PM

Printed : 3/14/2013 4:38:14 PM

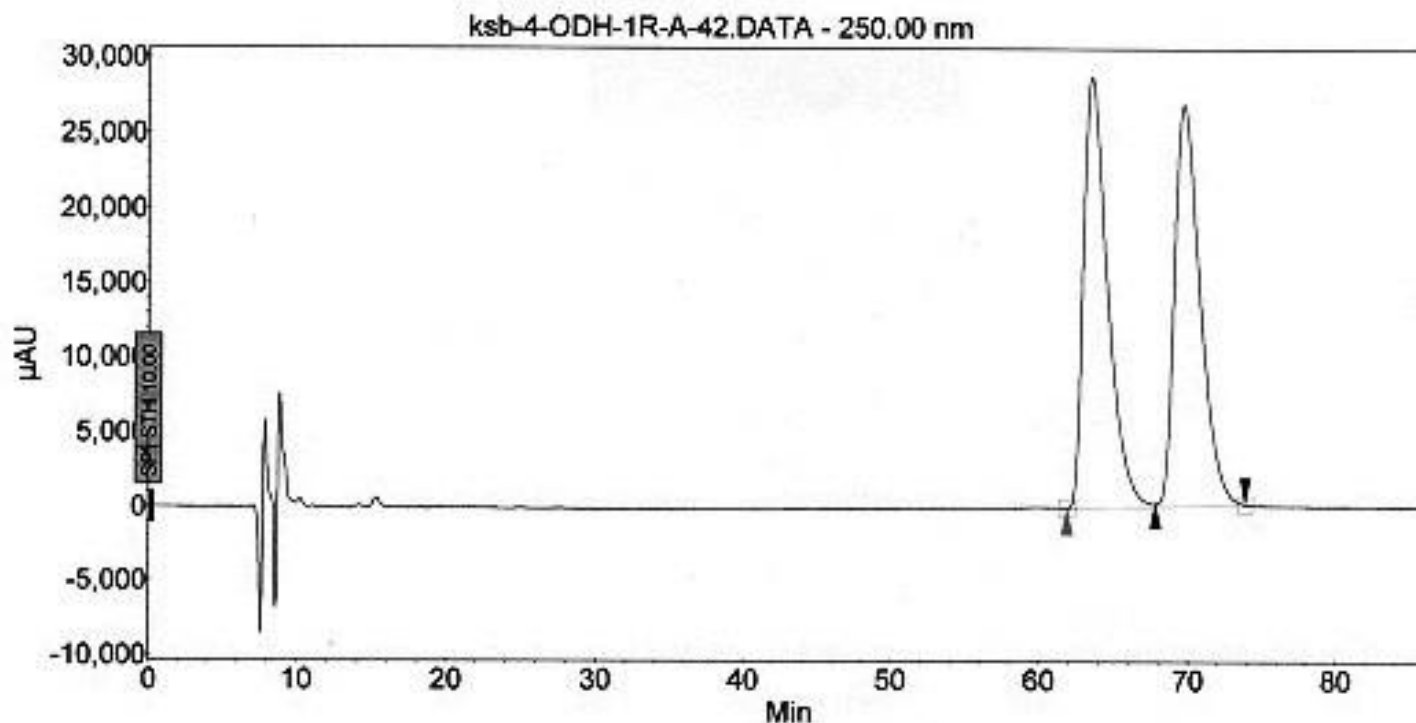

Peak results :

| Index | Name    | Time [Min] | Quantity [% Area] | Height [AU] | Area [AU.Min] | Area % [%] |
|-------|---------|------------|-------------------|-------------|---------------|------------|
| 1     | UNKNOWN | 63.497     | 50.11             | 28796.3     | 53967.4       | 50.113     |
| 2     | UNKNOWN | 69.695     | 49.89             | 26793.6     | 53723.4       | 49.887     |
| Total |         |            | 100.00            | 55589.9     | 107690.8      | 100.000    |

Fig S42. HPLC Profile of Racemic 3i

Chromatogram : ksb-4-ODH-1r-C-61\_channel2

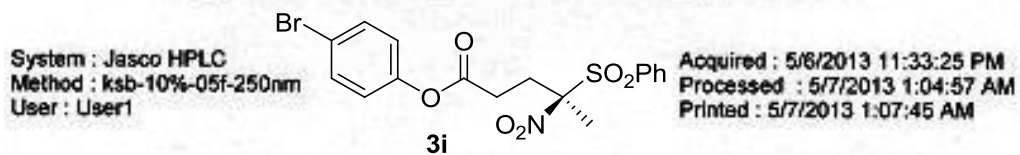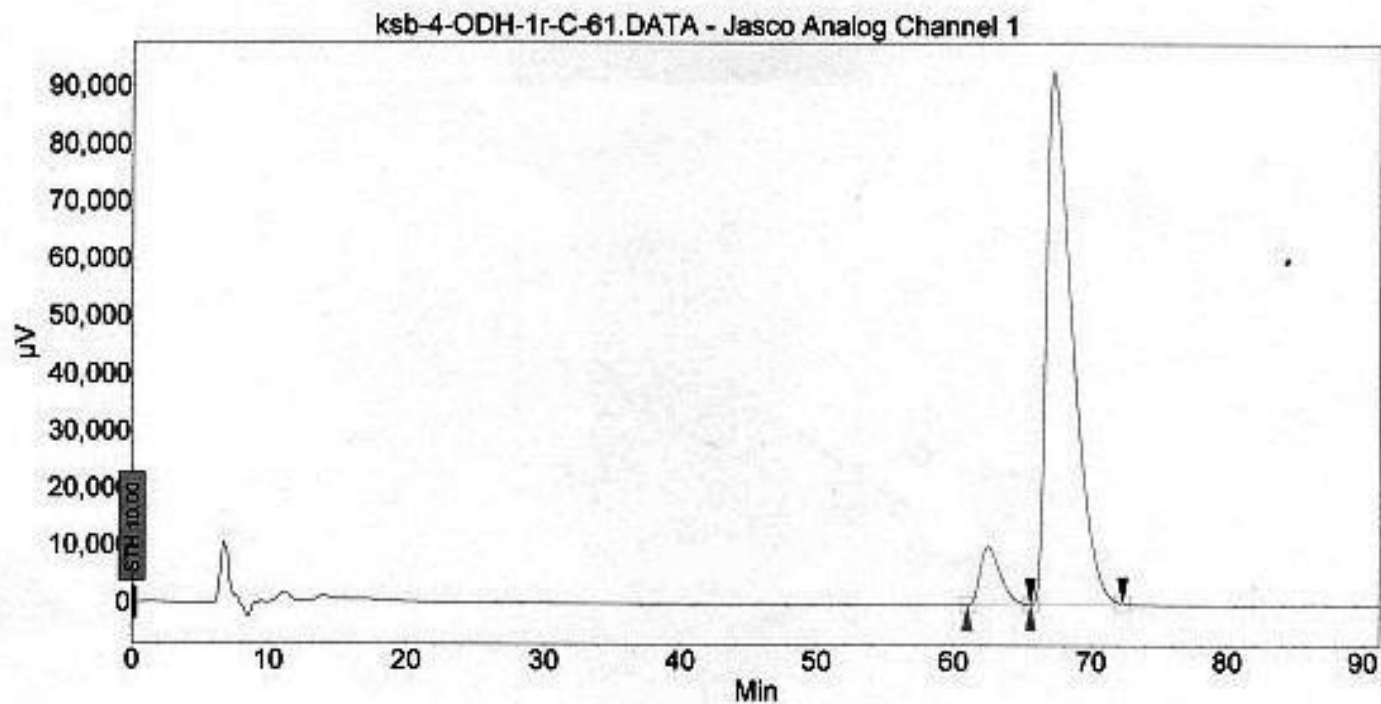

Peak results :

| Index | Name    | Time [Min] | Quantity [% Area] | Height [µV] | Area [µV·Min] | Area % [%] |
|-------|---------|------------|-------------------|-------------|---------------|------------|
| 1     | UNKNOWN | 62.475     | 7.78              | 10144.3     | 17056.2       | 7.779      |
| 2     | UNKNOWN | 67.167     | 92.22             | 92896.8     | 202203.5      | 92.221     |
| Total |         |            | 100.00            | 103041.1    | 219259.7      | 100.000    |

Fig S43. HPLC Profile of Enantioenriched 3i

```

NAME      INN-4-KSB-31C-1H
EXPNO     1
PROCNO    1
Date_     20130219
Time      21.09
INSTRUM   spect
PROBHD    5 mm PABBO BB-
PULPROG   zg30
ID        65536
SOLVENT   CDCl3
NS        16
DS        0
SWH       8223.685 Hz
FIDRES    0.125483 Hz
AQ        3.9846387 sec
RG        101
DN        60.800 usec
DE        6.50 usec
TE        294.3 K
D1        1.00000000 sec
TD0       1

```

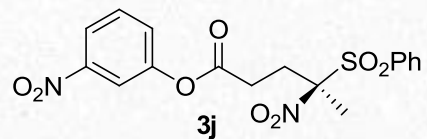

```

===== CHANNEL f1 =====
NUC1      1H
P1        13.50 usec
PL1       -1.00 dB
PL1W      10.56200695 W
SFO1      400.1324710 MHz
SI        32768
SF        400.1300095 MHz
WDW       EM
SSB       0
LB        0.30 Hz
GB        0
PC        1.00

```

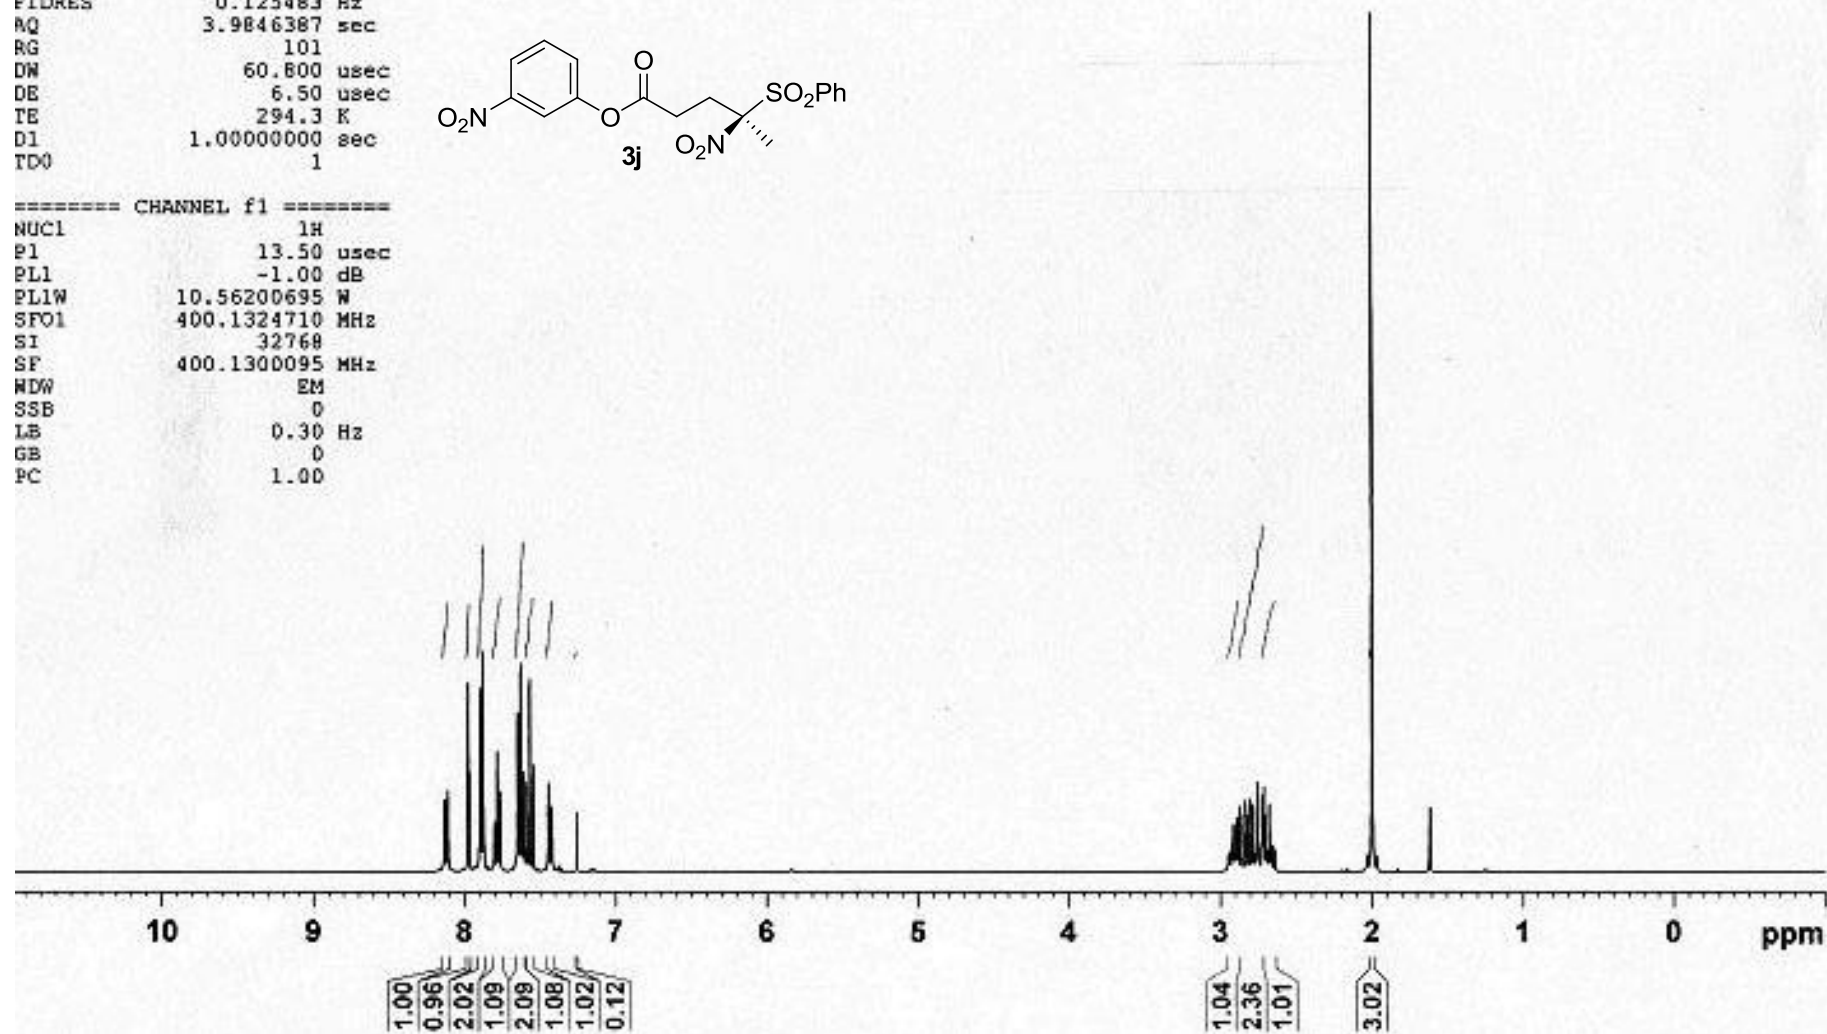

Fig S44. <sup>1</sup>H NMR Spectrum of 3j



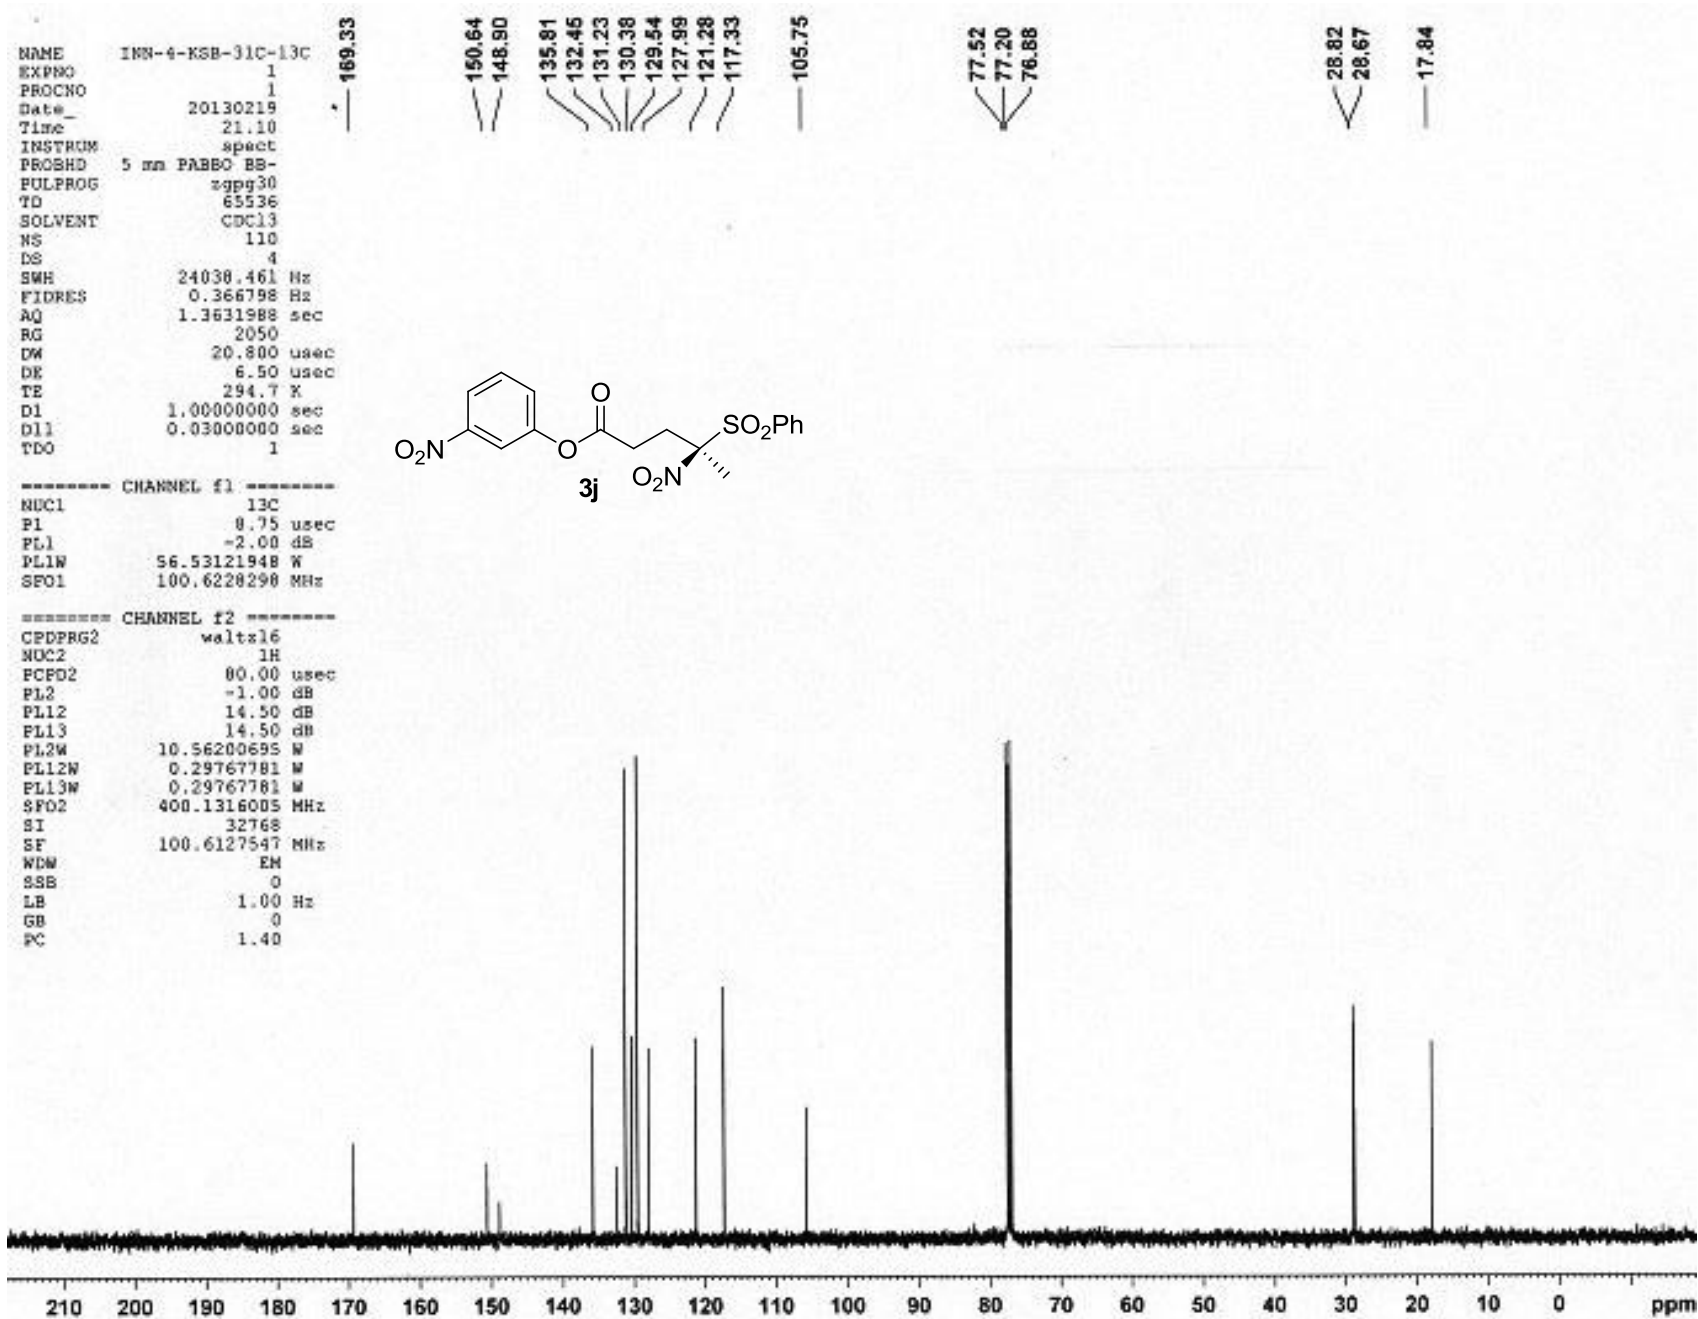

Fig S45. <sup>13</sup>C NMR Spectrum of 3j

# Chromatogram : ksb-4-ODH-2r-C-31\_channel4

System : Jasco HPLC  
 Method : ksb-10%-1f-250nm  
 User : User1

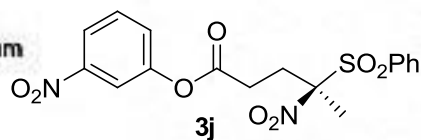

Acquired : 5/11/2013 12:46:37 PM  
 Processed : 5/11/2013 2:10:50 PM  
 Printed : 5/11/2013 4:01:59 PM

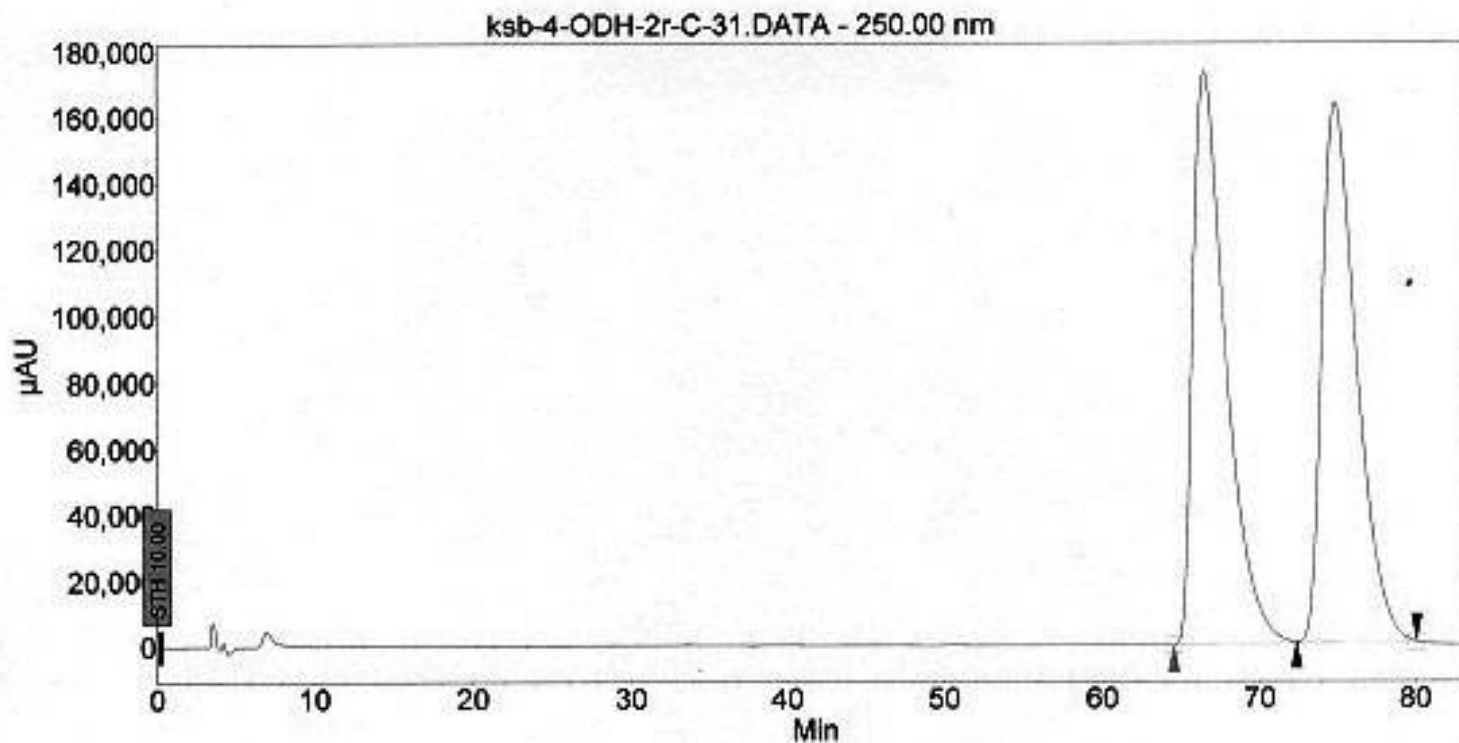

## Peak results :

| Index | Name    | Time [Min] | Quantity [% Area] | Height [μAU] | Area [μAU.Min] | Area % [%] |
|-------|---------|------------|-------------------|--------------|----------------|------------|
| 1     | UNKNOWN | 66.483     | 50.00             | 173161.1     | 421560.8       | 50.004     |
| 2     | UNKNOWN | 74.880     | 50.00             | 163182.2     | 421497.9       | 49.996     |
| Total |         |            | 100.00            | 336343.4     | 843058.6       | 100.000    |

Fig S46. HPLC Profile of Racemic 3j

# Chromatogram : ksb-4-ODH-2r-C-63\_channel2

System : Jasco HPLC  
Method : ksb-10%-1f-250nm  
User : User1

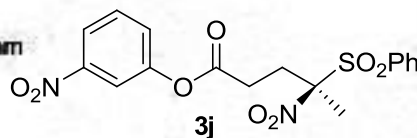

Acquired : 5/11/2013 2:11:41 PM  
Processed : 5/11/2013 4:03:31 PM  
Printed : 5/11/2013 4:04:21 PM

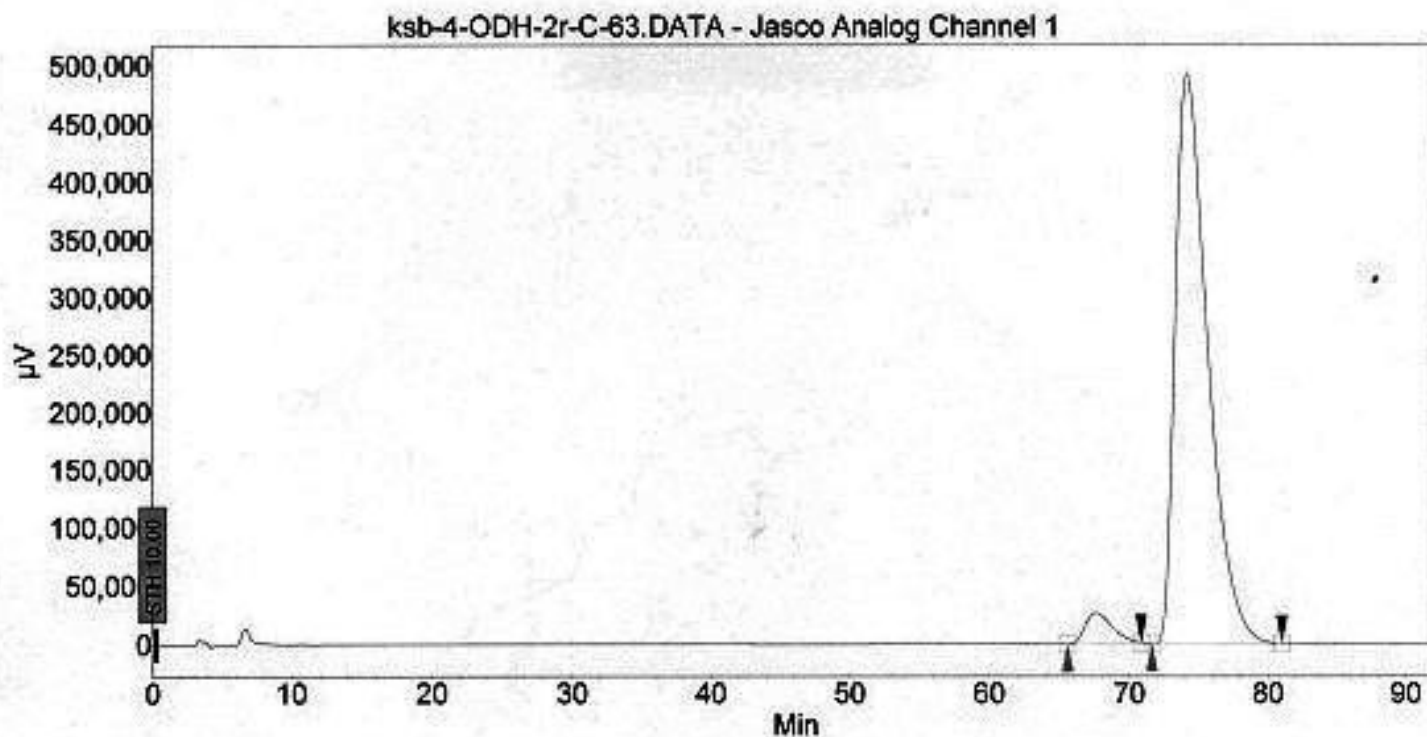

## Peak results :

| Index | Name    | Time [Min] | Quantity [% Area] | Height [µV] | Area [µV.Min] | Area % [%] |
|-------|---------|------------|-------------------|-------------|---------------|------------|
| 1     | UNKNOWN | 67.600     | 4.18              | 26166.7     | 58104.8       | 4.179      |
| 2     | UNKNOWN | 74.167     | 95.82             | 492198.1    | 1332327.3     | 95.821     |
| Total |         |            | 100.00            | 518364.8    | 1390432.0     | 100.000    |

Fig S47. HPLC Profile of Enantioenriched 3j

NAME INN-4-KSB-33B-1H  
 EXPNO 2  
 PROCNO 1  
 Date\_ 20130223  
 Time 18.45  
 INSTRUM spect  
 PROBHD 5 mm PABBO BB-  
 PULPROG zg30  
 TD 65536  
 SOLVENT CDCl3  
 NS 16  
 DS 0  
 SWH 8223.685 Hz  
 FIDRES 0.125483 Hz  
 AQ 3.9846387 sec  
 RG 32  
 DW 60.800 usec  
 DE 6.50 usec  
 TE 293.8 K  
 D1 1.00000000 sec  
 TD0 1

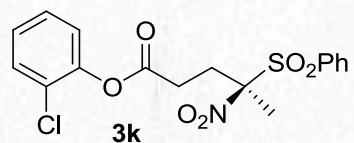

----- CHANNEL f1 -----  
 NUC1 1H  
 P1 13.50 usec  
 PL1 -1.00 dB  
 PL1W 10.56200695 W  
 SFO1 400.1324710 MHz  
 SI 32768  
 SF 400.1300095 MHz  
 WDW EM  
 SSB 0  
 LB 0.30 Hz  
 GB 0  
 PC 1.00

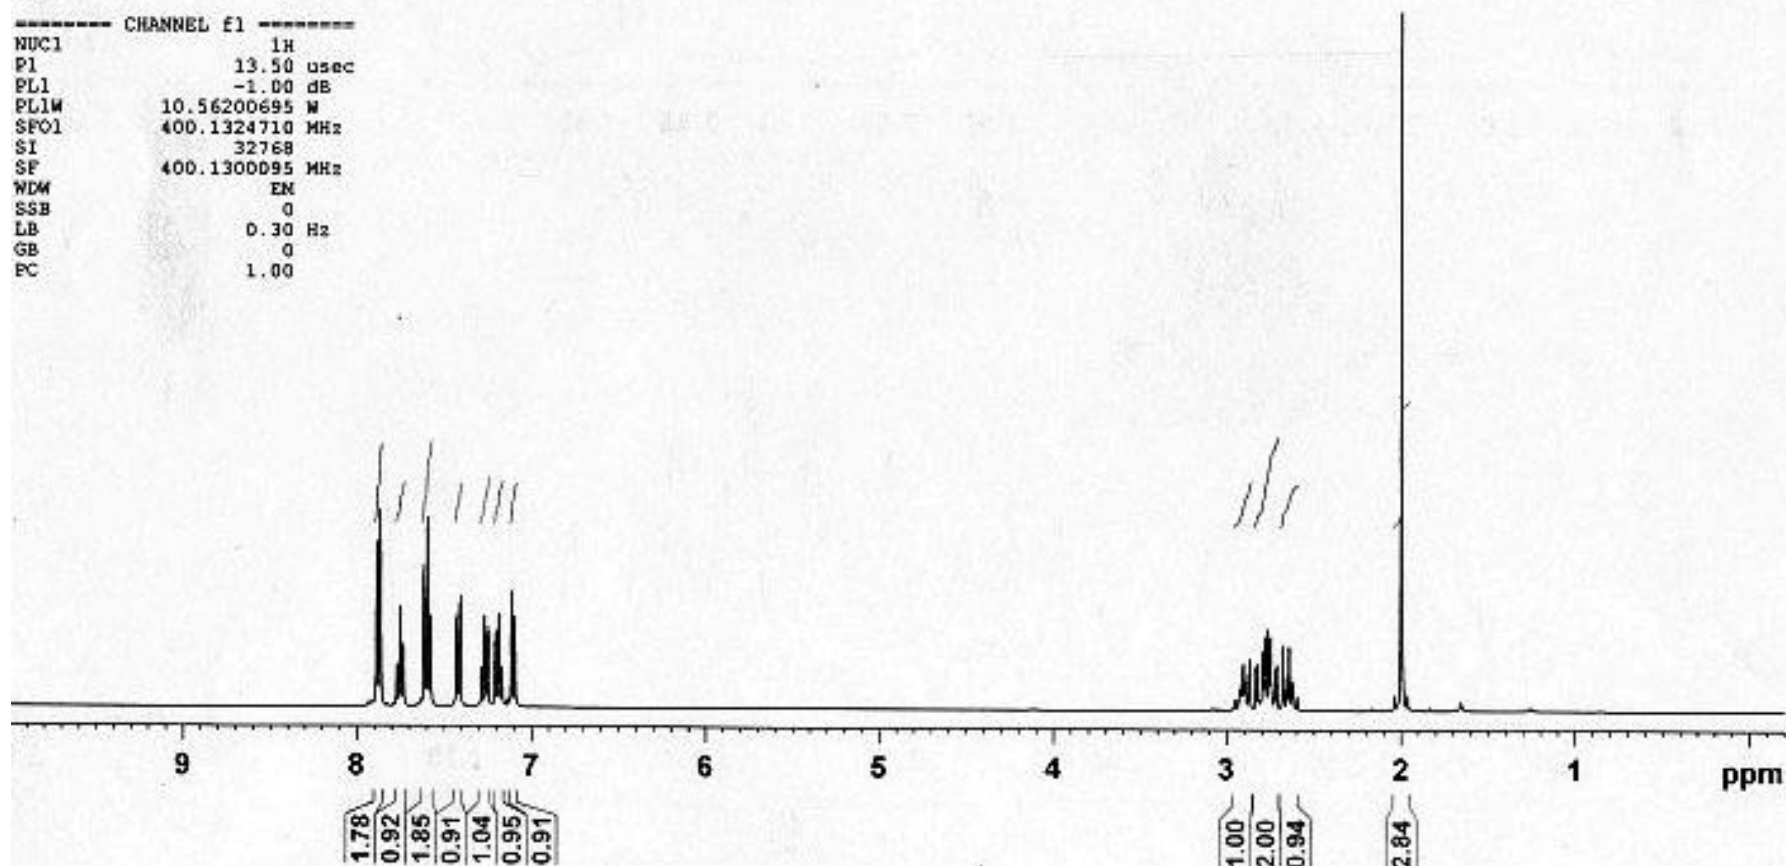

Fig S48. <sup>1</sup>H NMR Spectrum of 3k

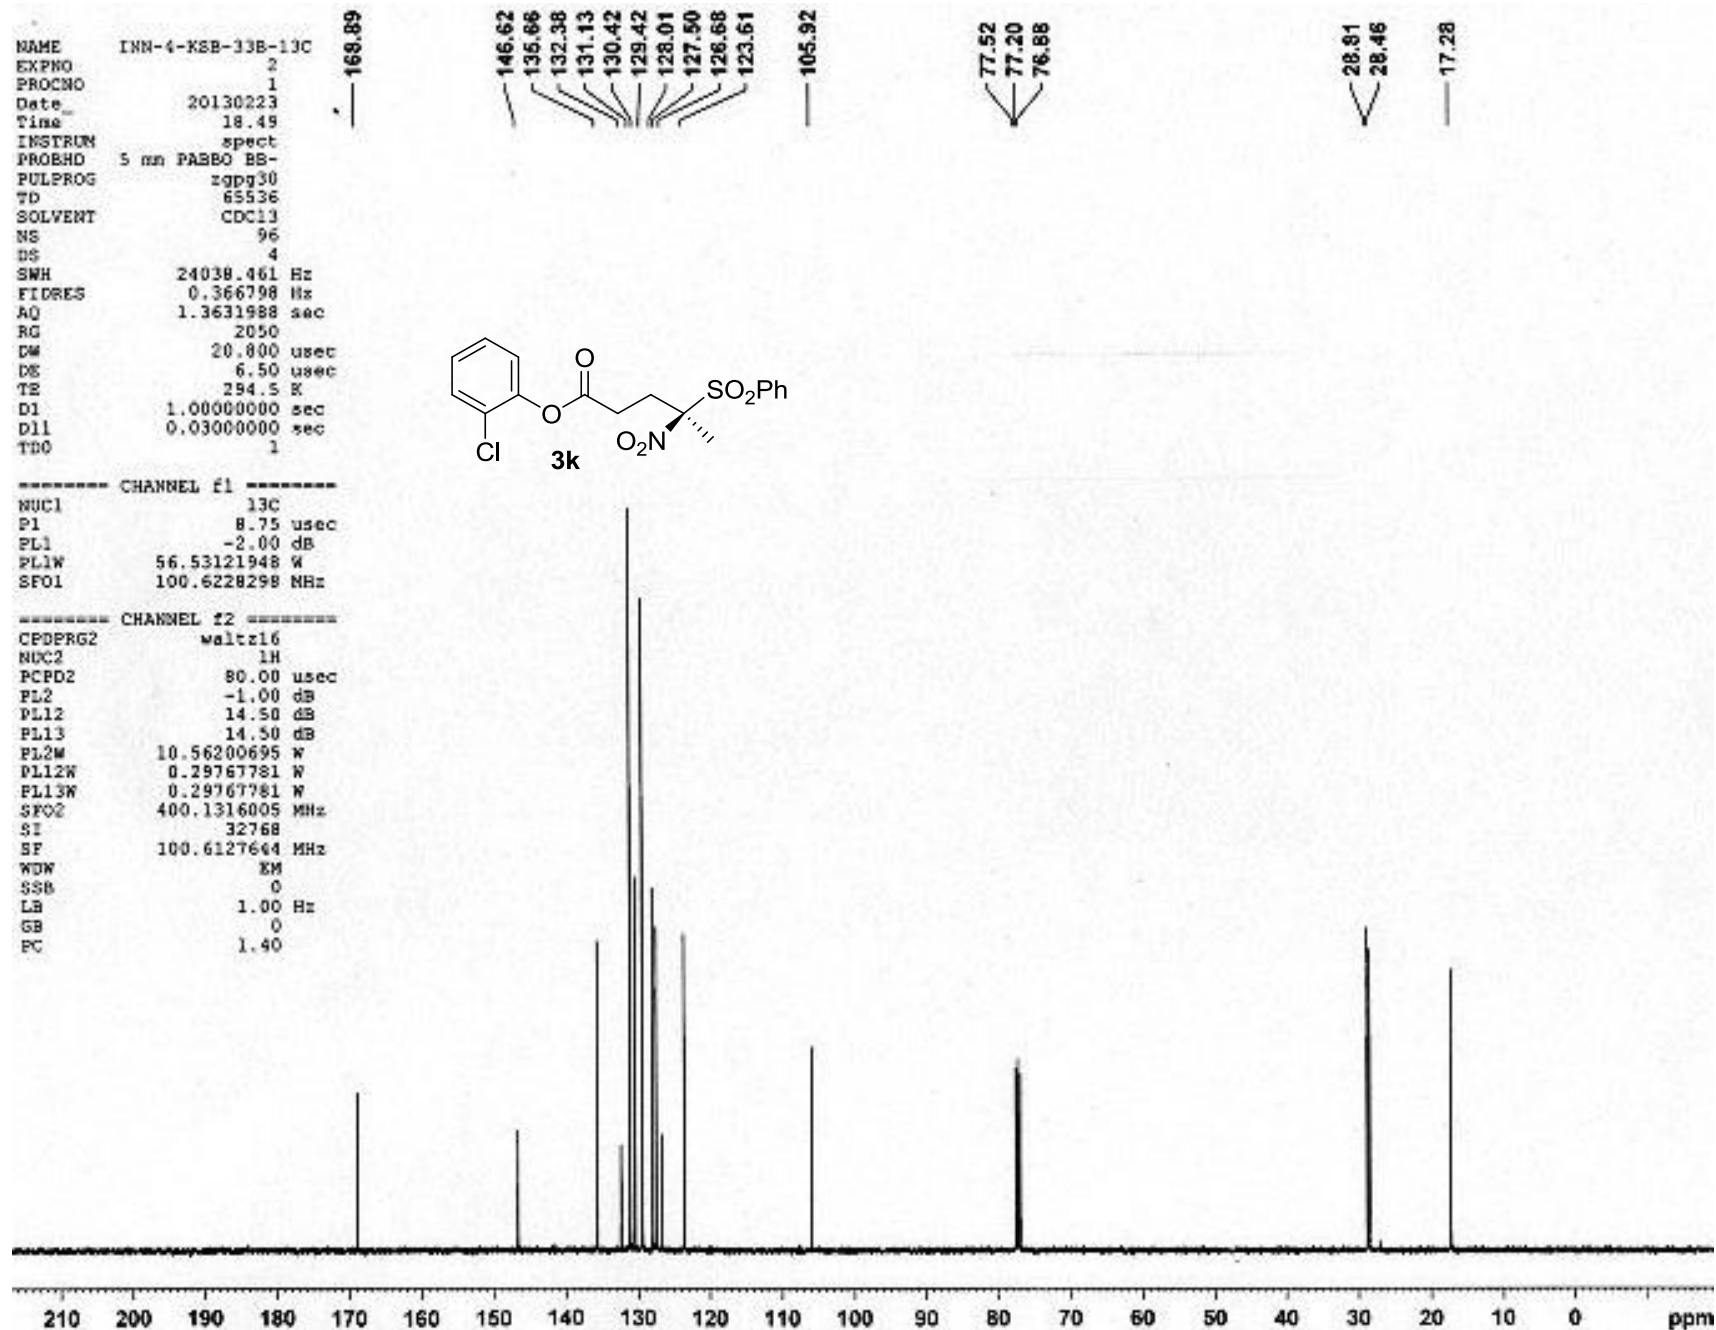

Fig S49. <sup>13</sup>C NMR Spectrum of 3k

# Chromatogram : ksb-4-ODH-2r-b-33\_channel4

System : Jasco HPLC  
Method : ksb-10%-05f-250nm  
User : User1

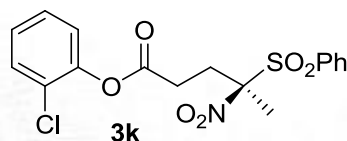

Acquired : 5/6/2013 8:13:27 PM  
Processed : 5/6/2013 10:05:41 PM  
Printed : 5/8/2013 10:06:16 PM

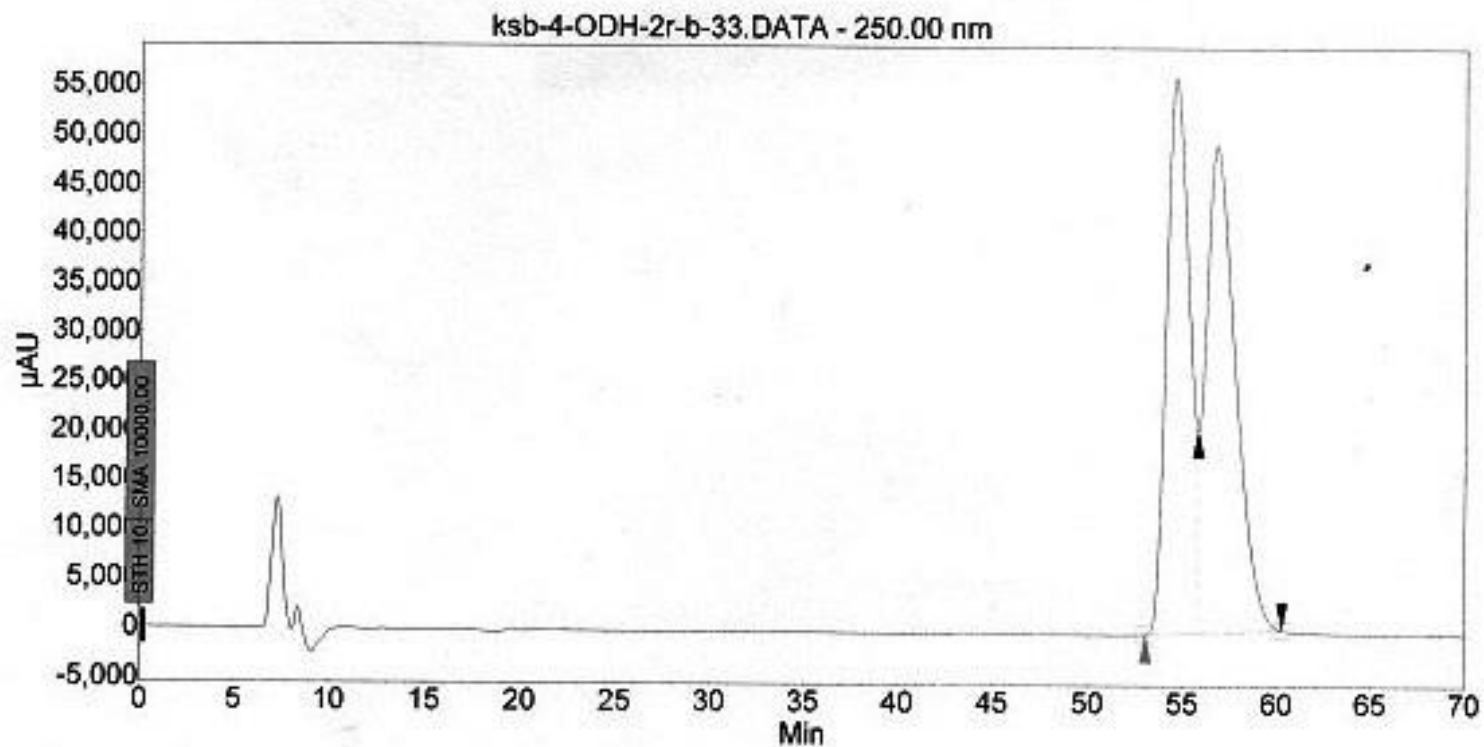

## Peak results :

| Index | Name    | Time [Min] | Quantity [% Area] | Height [AU] | Area [AU.Min] | Area % [%] |
|-------|---------|------------|-------------------|-------------|---------------|------------|
| 1     | UNKNOWN | 54.540     | 46.34             | 56319.2     | 78928.5       | 46.342     |
| 2     | UNKNOWN | 56.686     | 53.66             | 49482.6     | 91388.8       | 53.658     |
| Total |         |            | 100.00            | 105801.9    | 170317.3      | 100.000    |

Fig S50. HPLC Profile of Racemic 3k

# Chromatogram : ksb-4-ODH-1r-B-62\_channel2

System : Jasco HPLC  
Method : ksb-10%-05f-250nm  
User : User1

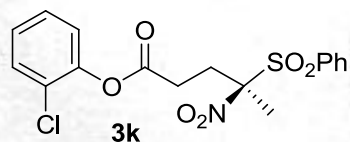

Acquired : 5/6/2013 5:37:37 PM  
Processed : 5/6/2013 7:28:00 PM  
Printed : 5/6/2013 10:06:42 PM

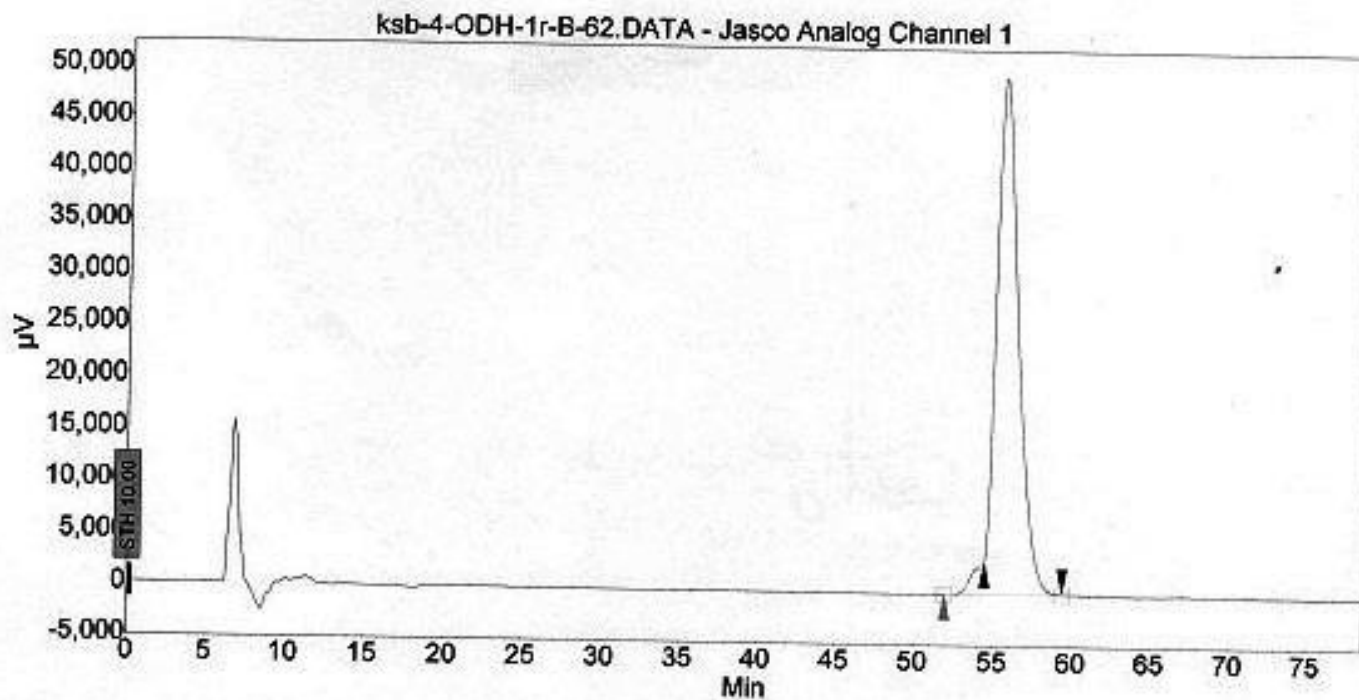

## Peak results :

| Index | Name    | Time [Min] | Quantity [% Area] | Height [µV] | Area [µV.Min] | Area % [%] |
|-------|---------|------------|-------------------|-------------|---------------|------------|
| 1     | UNKNOWN | 54.475     | 3.20              | 3106.2      | 2654.8        | 3.200      |
| 2     | UNKNOWN | 55.458     | 96.80             | 49871.2     | 80298.6       | 96.800     |
| Total |         |            | 100.00            | 52977.4     | 82953.4       | 100.000    |

Fig S51. HPLC Profile of Enantioenriched 3k

NAME INN-4-KSB-70B-1H  
 EXPNO 2  
 PROCNO 1  
 Date\_ 20130523  
 Time\_ 20.25  
 INSTRUM spect  
 PROBHD 5 mm PABBO BB-  
 PULPROG zg30  
 TD 65536  
 SOLVENT CDCl3  
 NS 11  
 DS 0  
 SWH 8223.685 Hz  
 FIDRES 0.125483 Hz  
 AQ 3.9846387 sec  
 RG 32  
 DN 60.800 usec  
 DE 6.50 usec  
 TE 293.9 K  
 D1 1.00000000 sec  
 TD0 1

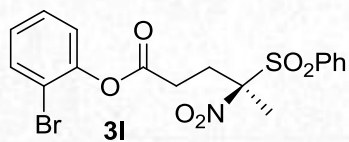

----- CHANNEL f1 -----  
 NUC1 1H  
 P1 13.50 usec  
 PL1 -1.00 dB  
 PL1W 10.56200695 W  
 SFO1 400.1324710 MHz  
 SI 32768  
 SF 400.1300095 MHz  
 WDW EM  
 SSB 0  
 LB 0.30 Hz  
 GB 0  
 PC 1.00

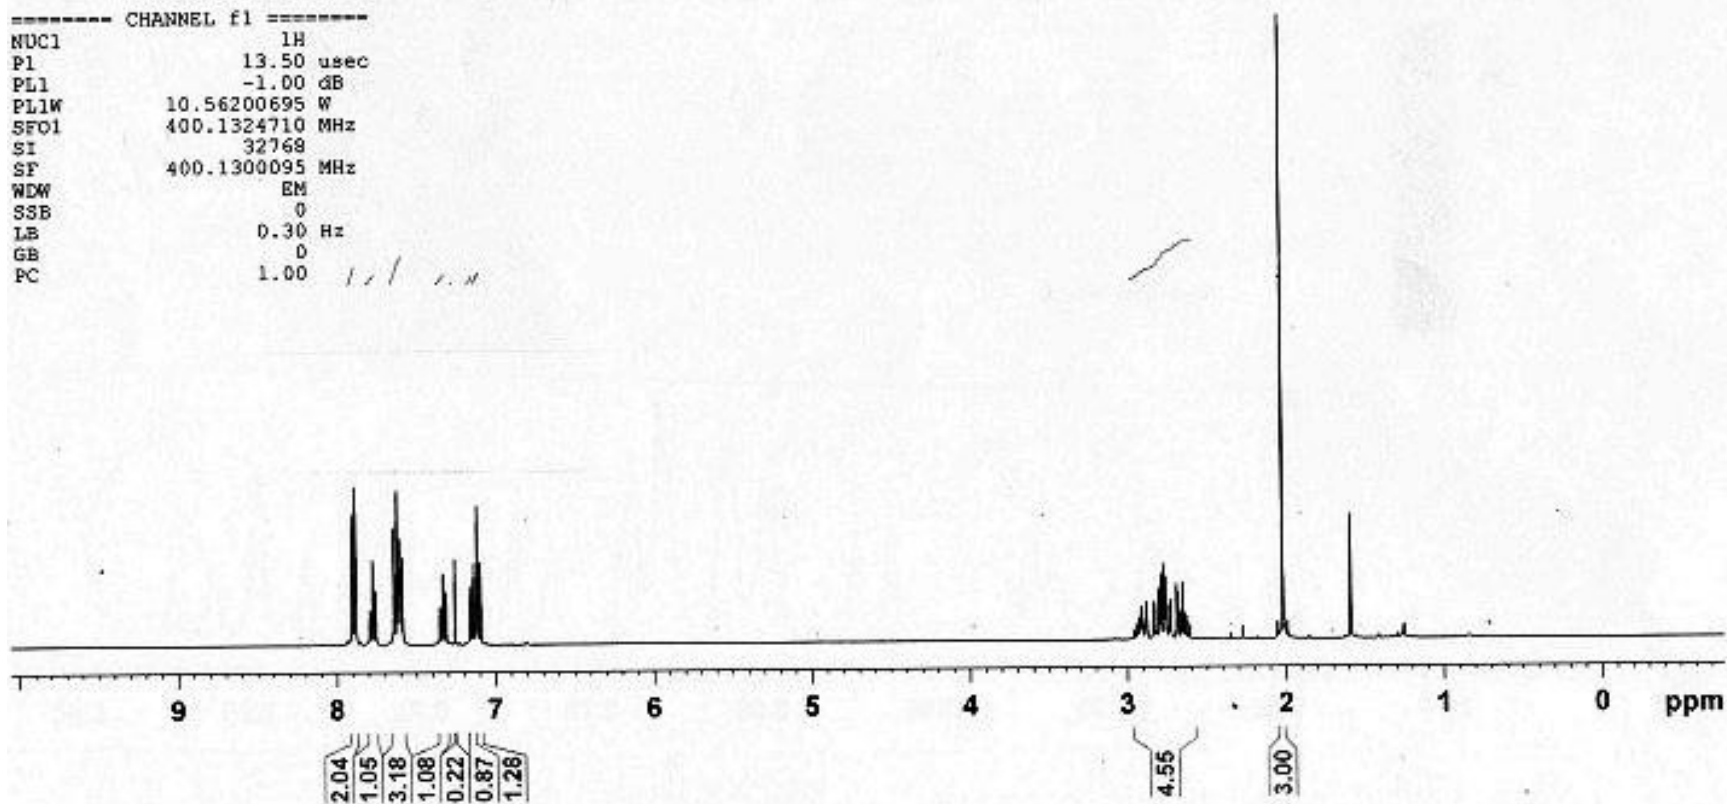

Fig S52. <sup>1</sup>H NMR Spectrum of 3l



```

NAME      INN-3-KSB-70B-13C
EXPNO     1
PROCNO    1
Date_     20130518
Time      16.53
INSTRUM   spect
PROBHD    5 mm PABBO BB-
PULPROG   zgpg30
TD        65536
SOLVENT   CDCl3
NS        84
DS        4
SWH       24030.461 Hz
FIDRES    0.366798 Hz
AQ        1.3631988 sec
RG        2050
DW        20.800 usec
DE        6.50 usec
TE        293.9 K
D1        1.00000000 sec
d11       0.03000000 sec
TDO       1

```

```

----- CHANNEL f1 -----
NUC1      13C
P1        8.75 usec
PL1       -2.00 dB
PL1W      56.53121948 W
SFO1      100.6228298 MHz

```

```

===== CHANNEL f2 =====
CPDPRG2   waltz16
NUC2      1H
PCPD2     80.00 usec
PL2       -1.00 dB
PL12      14.50 dB
PL13      14.50 dB
PL2W      10.56200695 W
PL12W     0.29767781 W
PL13W     0.29767781 W
SFO2      400.1316005 MHz
SI        32768
SF        100.6127547 MHz
WDW       EM
SSB       0
LB        1.00 Hz
GB        0
PC        1.40

```

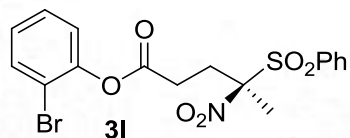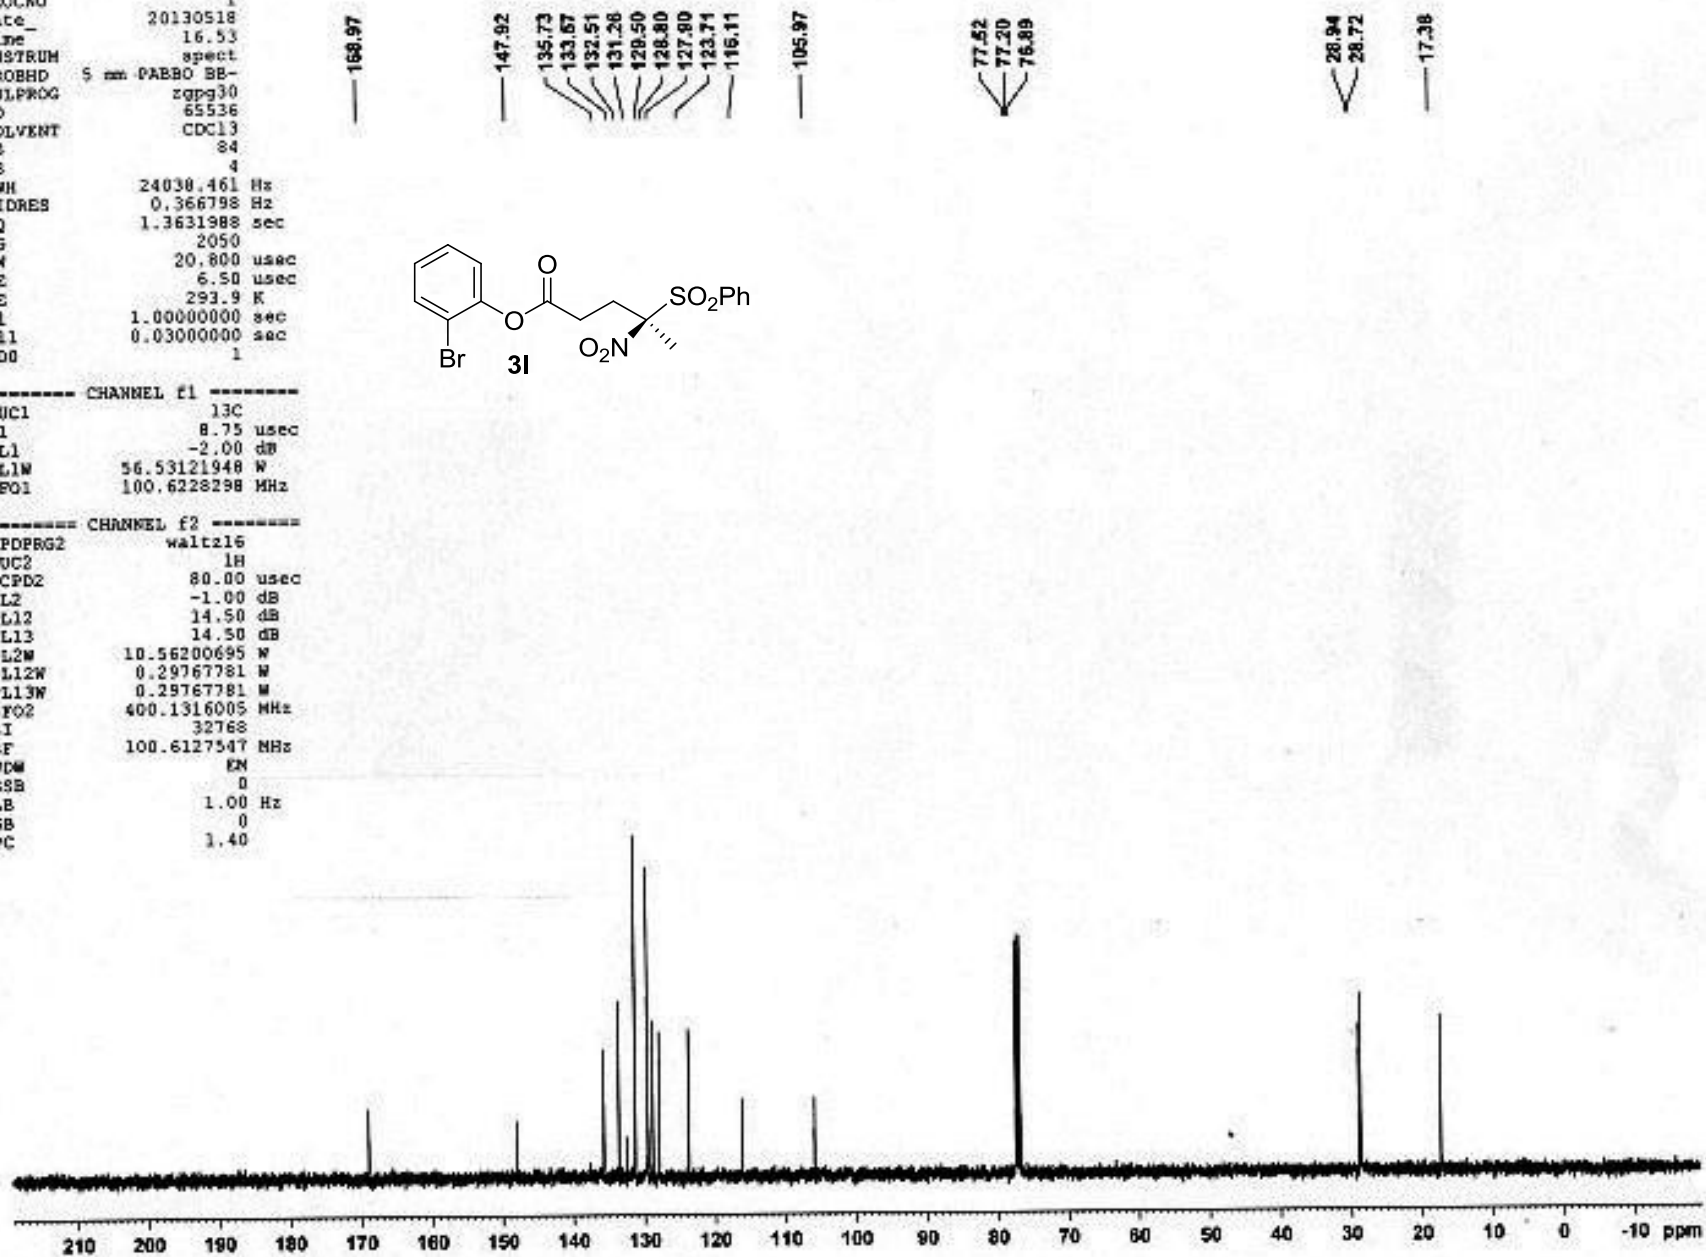

Fig S53. <sup>13</sup>C NMR Spectrum of 31

# Chromatogram : ksb-4-ADH-2r-B-70\_channel5

System : Jasco HPLC  
 Method : ksb-2%-05f-250nm  
 User : User1

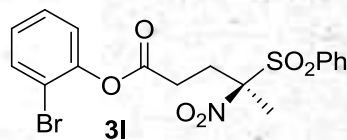

Acquired : 5/24/2013 5:46:53 PM  
 Processed : 5/24/2013 7:53:40 PM  
 Printed : 5/24/2013 8:13:21 PM

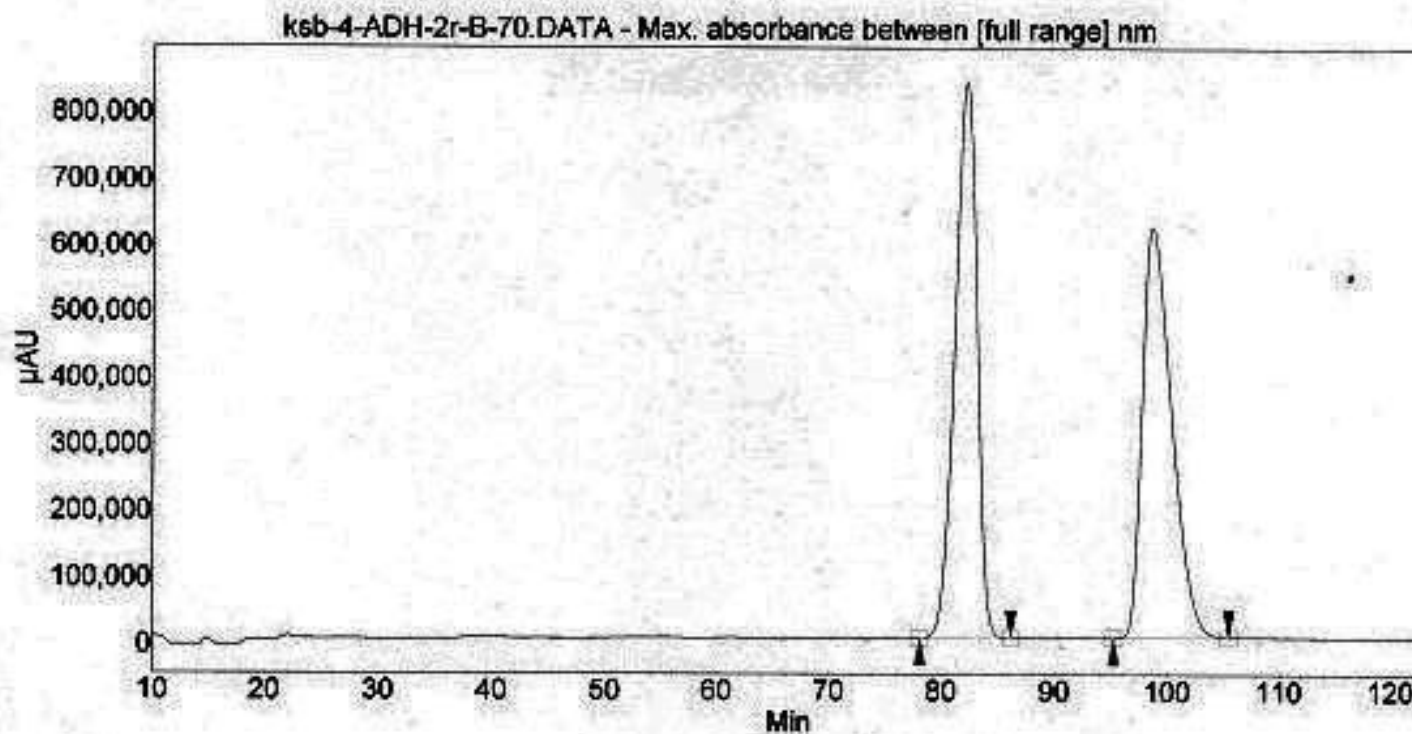

## Peak results :

| Index | Name    | Time (Min) | Quantity (% Area) | Height (UAU) | Area (UAU·Min) | Area % (%) |
|-------|---------|------------|-------------------|--------------|----------------|------------|
| 1     | UNKNOWN | 82.171     | 50.24             | 836723.9     | 1688640.7      | 50.241     |
| 2     | UNKNOWN | 98.618     | 49.76             | 618832.7     | 1070534.9      | 49.759     |
| Total |         |            | 100.00            | 1455556.6    | 3759175.6      | 100.000    |

Fig S54. HPLC Profile of Racemic 3l

# Chromatogram : ksb-4-ADH-1r-B-69\_channel5

System : Jasco HPLC  
 Method : ksb-2%-05f-250nm  
 User : User1

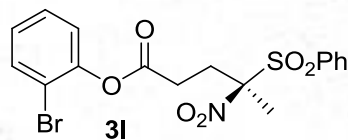

Acquired : 5/24/2013 8:12:08 PM  
 Processed : 5/24/2013 11:03:40 PM  
 Printed : 5/24/2013 11:04:36 PM

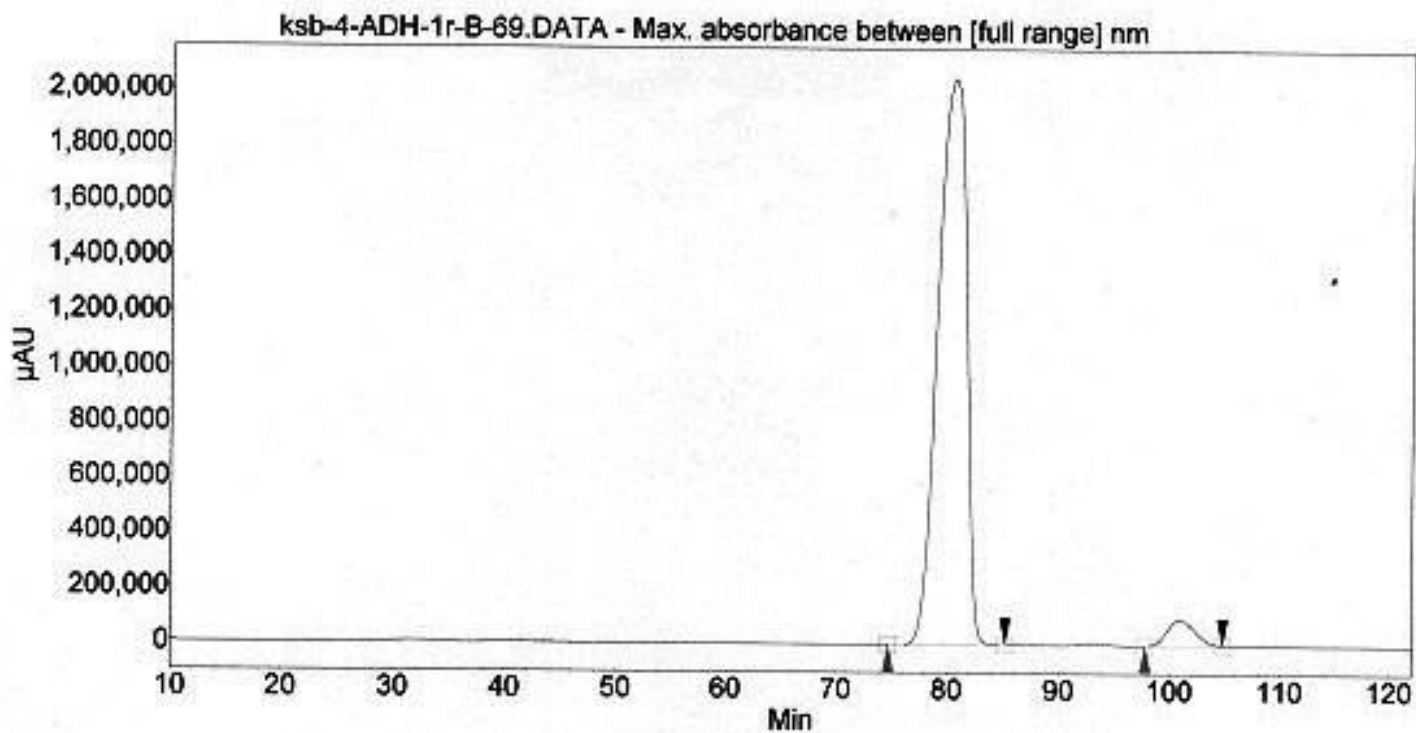

## Peak results :

| Index | Name    | Time [Min] | Quantity [% Area] | Height [μAU] | Area [μAU.Min] | Area % [%] |
|-------|---------|------------|-------------------|--------------|----------------|------------|
| 1     | UNKNOWN | 80.512     | 95.63             | 2050552.2    | 6087593.1      | 95.628     |
| 2     | UNKNOWN | 100.919    | 4.37              | 95544.1      | 278294.0       | 4.372      |
| Total |         |            | 100.00            | 2146096.4    | 6365887.1      | 100.000    |

Fig S55. HPLC Profile of Enantioenriched 3l

NAME INN-4-KSB-32A-1H  
 EXPNO 1  
 PROCNO 1  
 Date\_ 20130219  
 Time\_ 21.00  
 INSTRUM spect  
 PROBHD 5 mm PABBO BB-  
 PULPROG zg30  
 TD 65536  
 SOLVENT CDCl3  
 NS 9  
 DS 0  
 SWH 8223.685 Hz  
 FIDRES 0.125483 Hz  
 AQ 3.9846387 sec  
 RG 32  
 DW 60.800 usec  
 DE 6.50 usec  
 TE 294.3 K  
 D1 1.00000000 sec  
 TDO 1

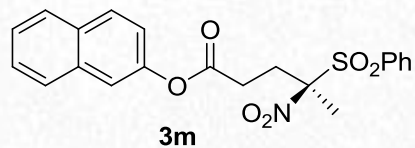

----- CHANNEL f1 -----  
 NUC1 1H  
 P1 13.50 usec  
 PL1 -1.00 dB  
 PL1W 10.56200695 W  
 SFO1 400.1324710 MHz  
 SI 32768  
 SF 400.1300095 MHz  
 MDW EM  
 SSB 0  
 LB 0.30 Hz  
 GB 0  
 PC 1.00

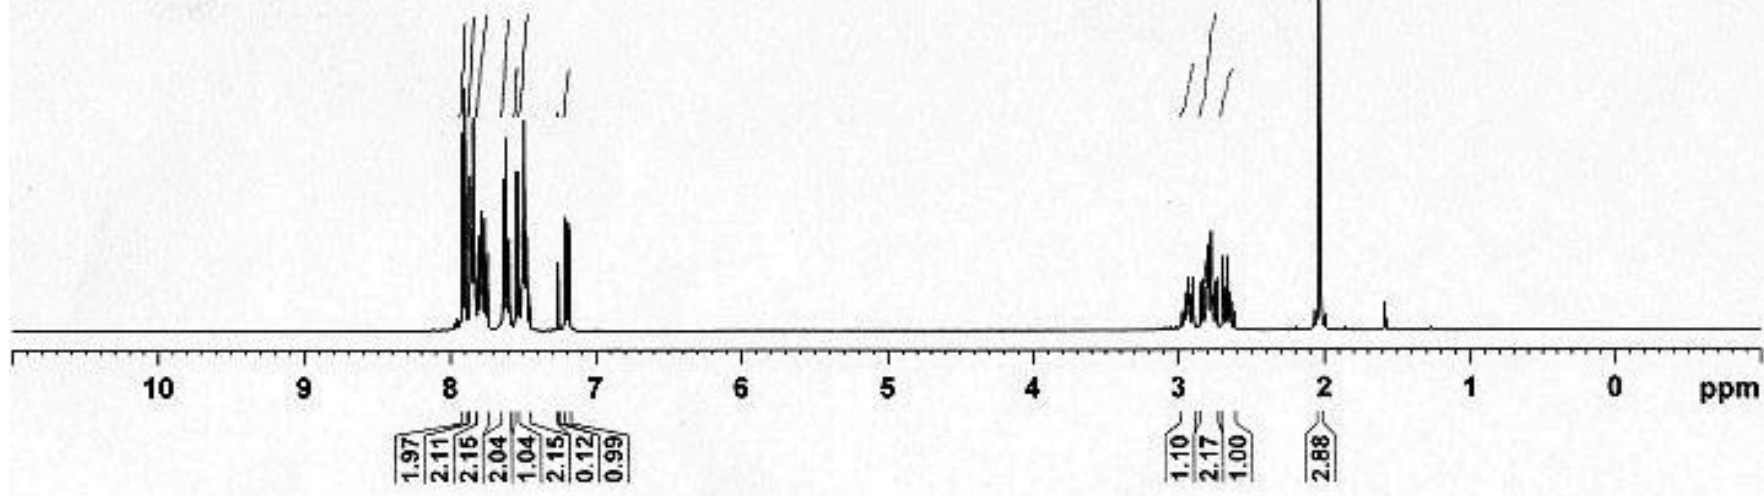

Fig S56. <sup>1</sup>H NMR Spectrum of 3m

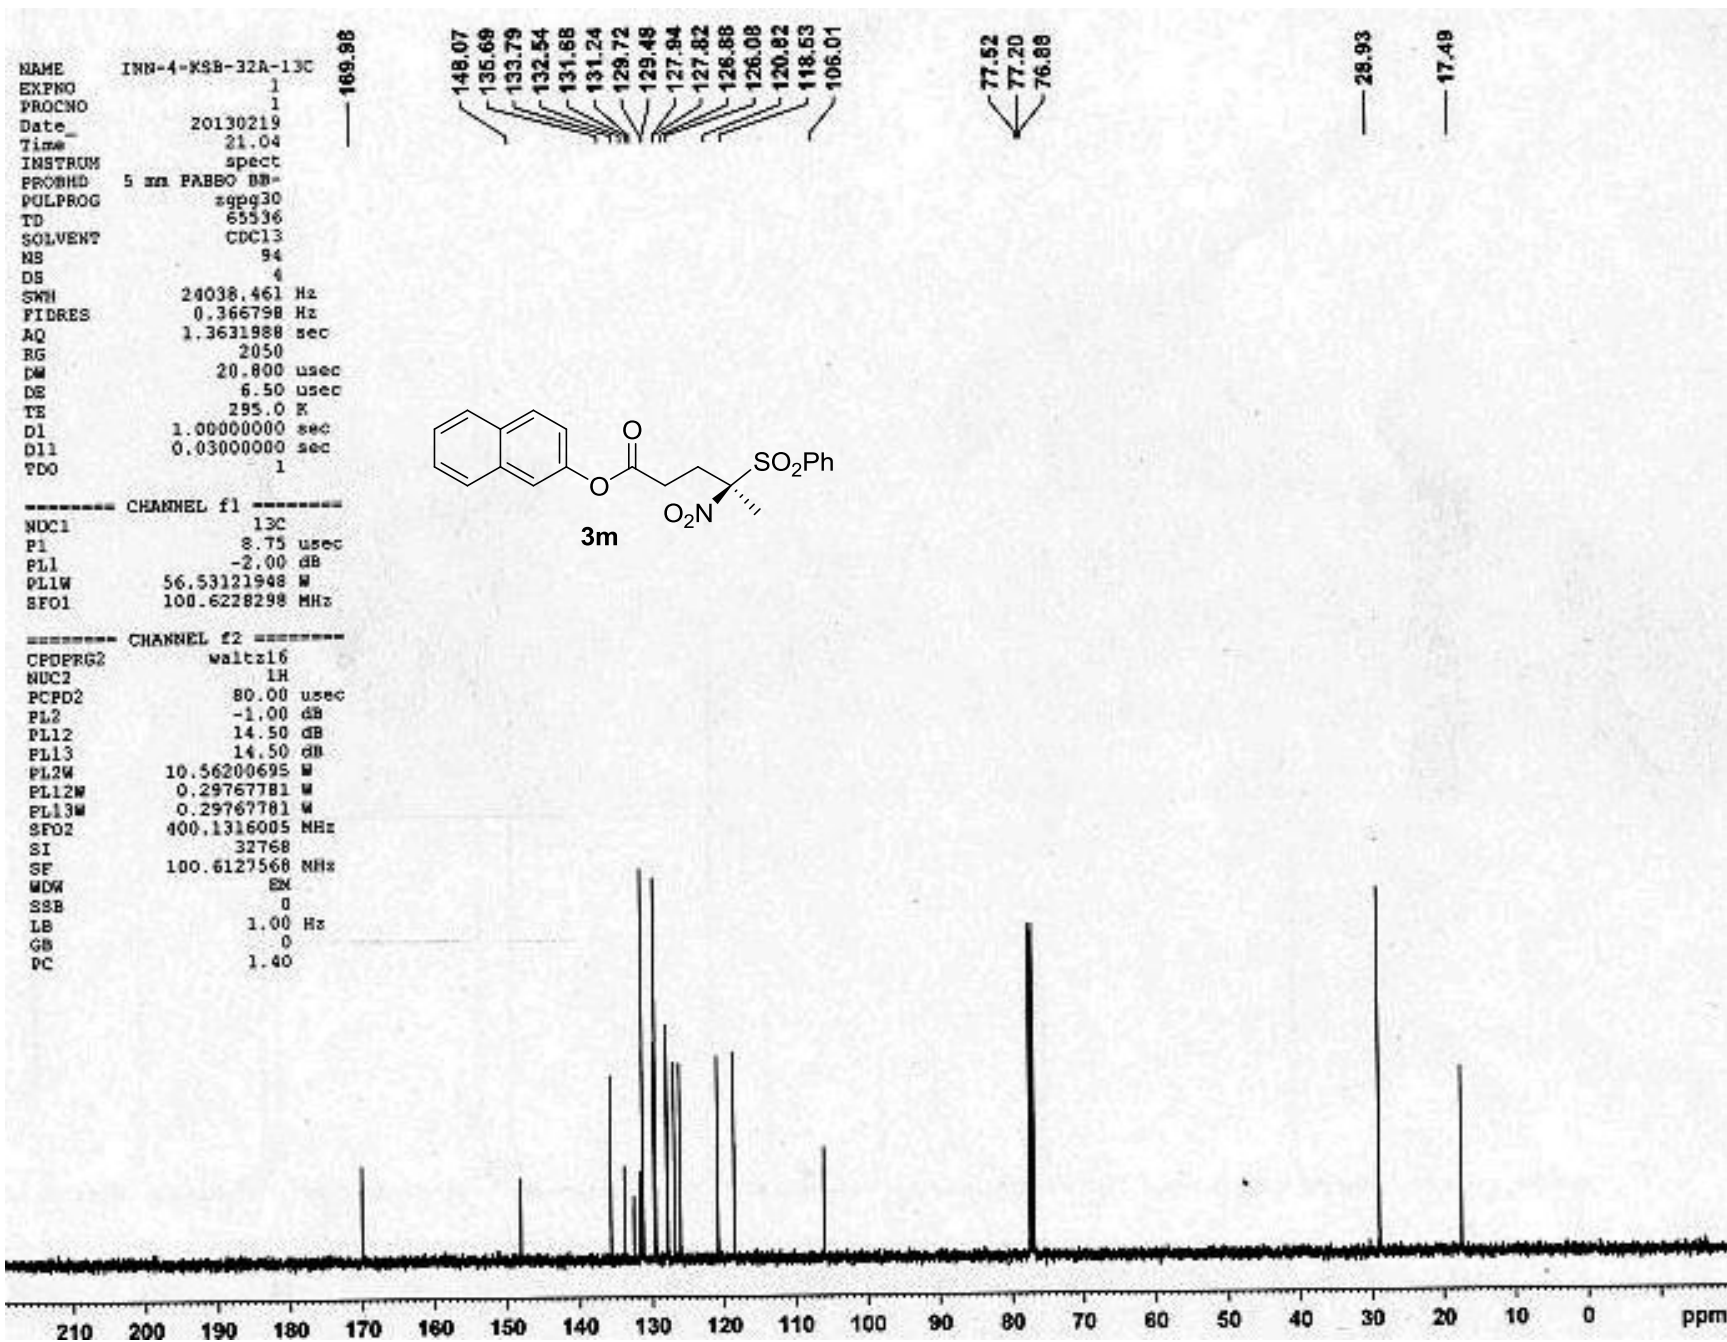

Fig S57. <sup>13</sup>C NMR Spectrum of 3m

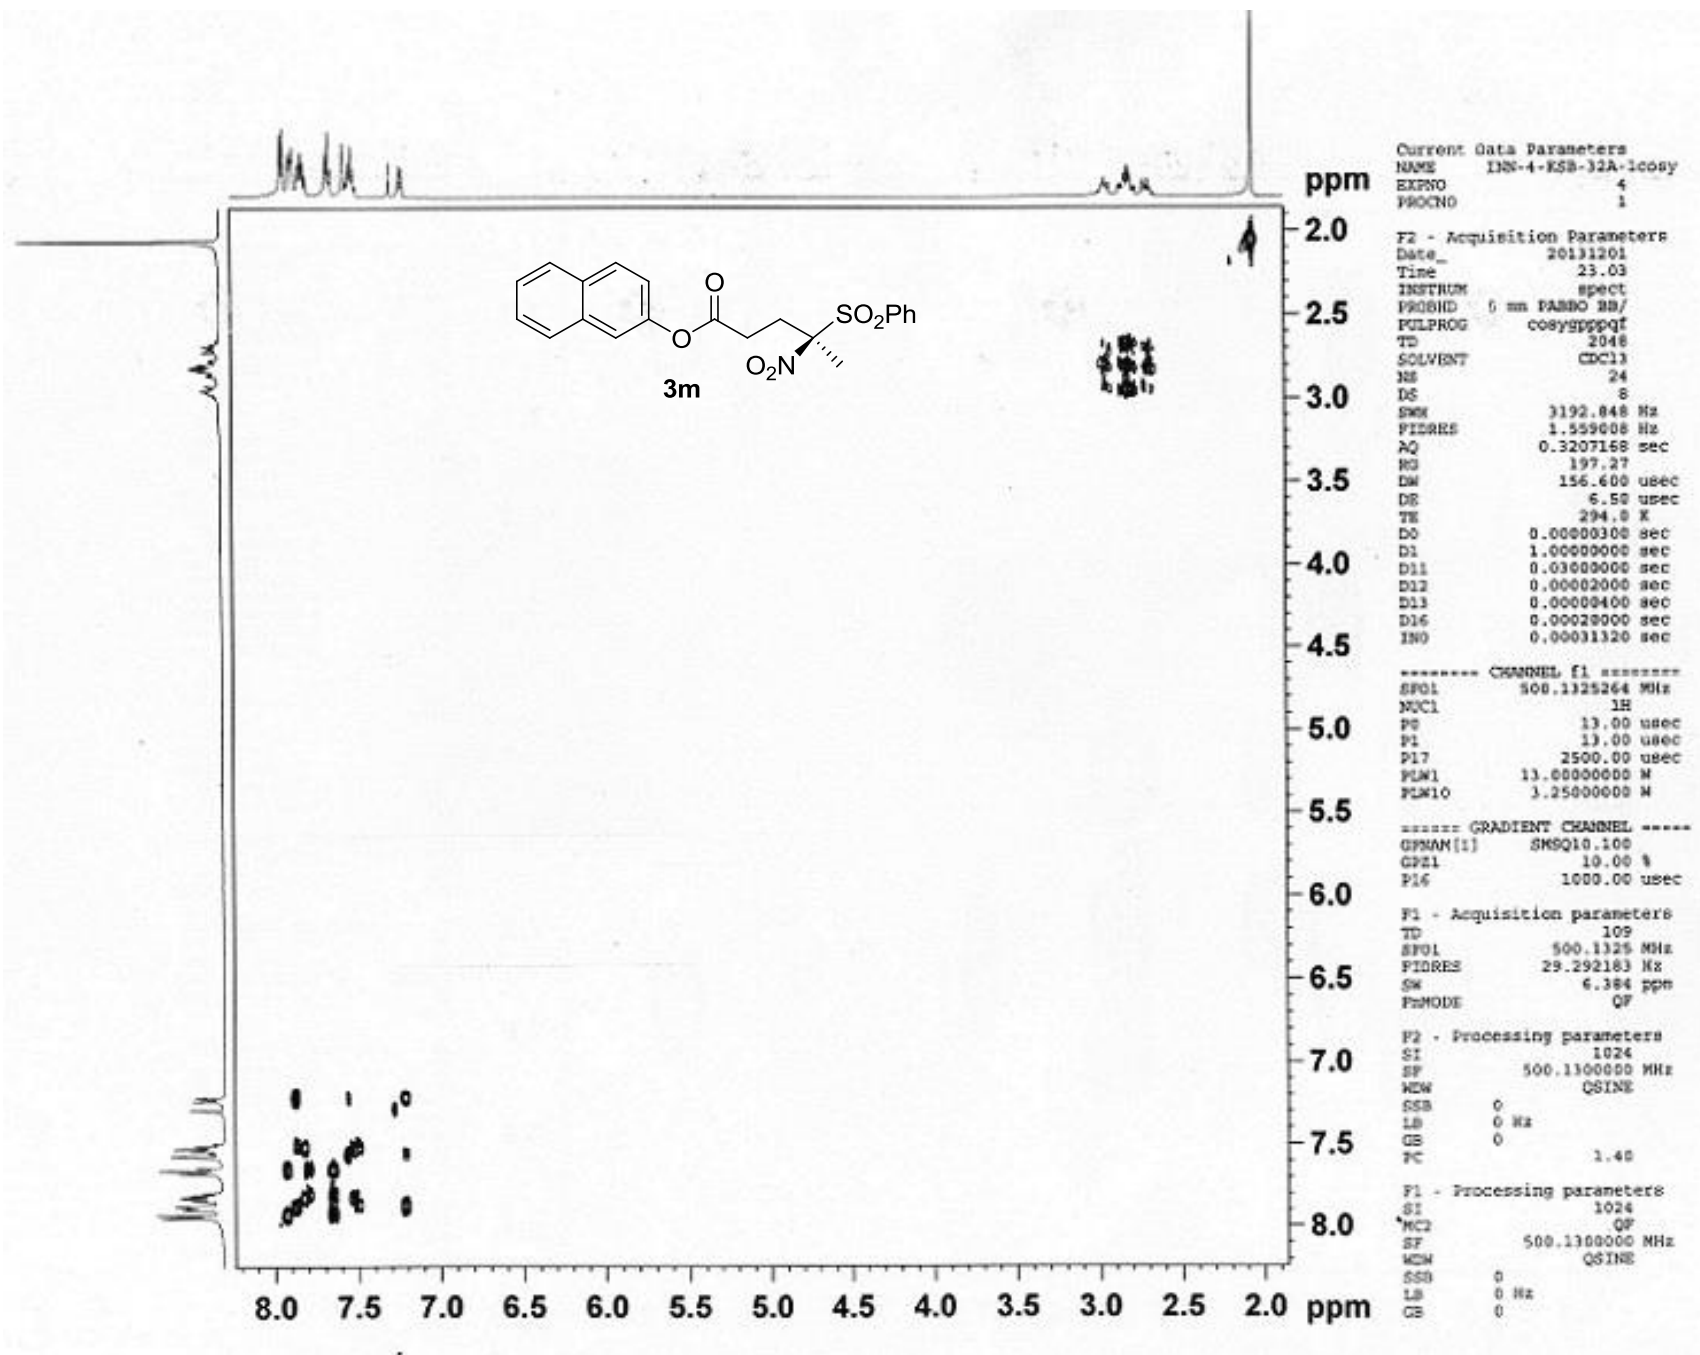

Fig S58.  $^1\text{H}$ - $^1\text{H}$  COSY NMR Spectrum of 3m

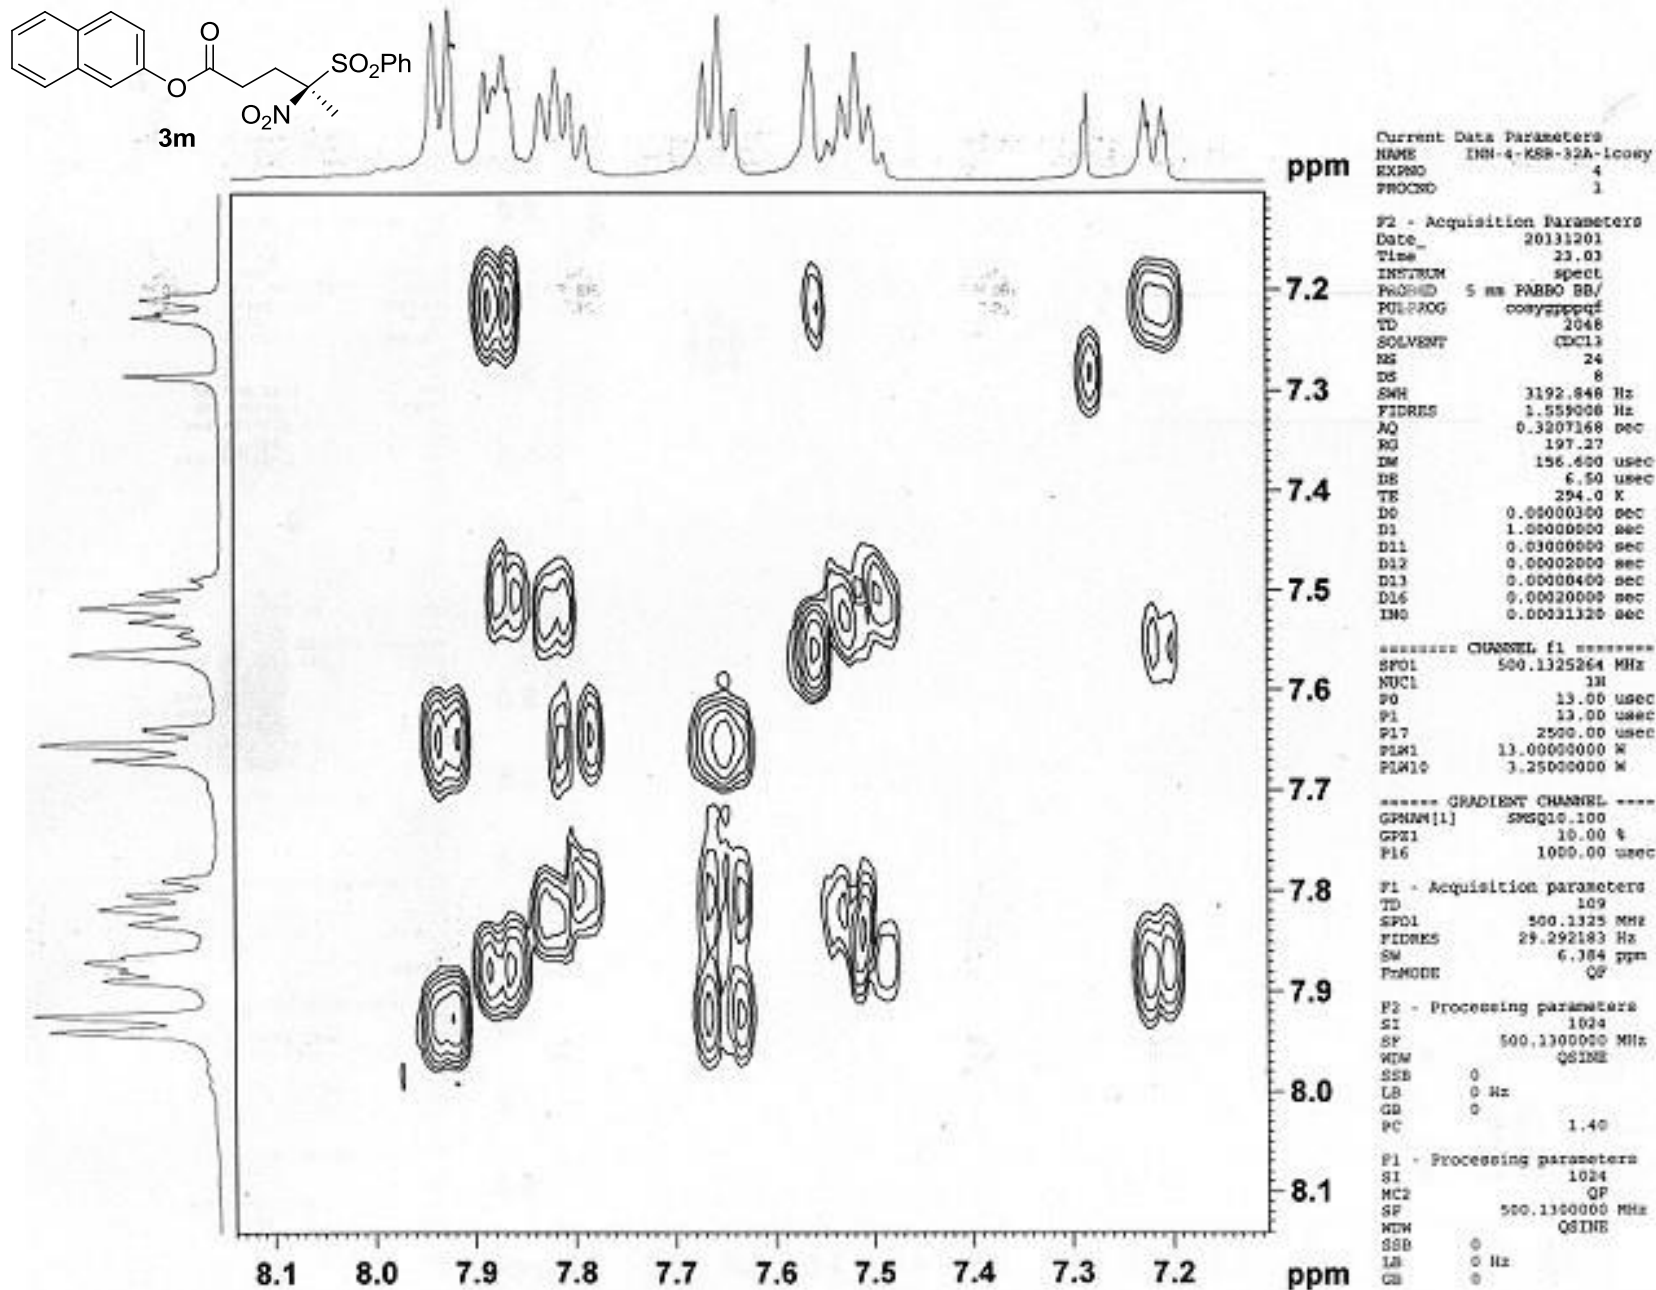

Fig S59.  $^1\text{H}$ - $^1\text{H}$  Expanded COSY NMR Spectrum of 3m

# Chromatogram : ksb-4-ODH-5R-A-32\_channel4

System : Jasco HPLC  
 Method : ksb-30%-1f-250nm  
 User : User1

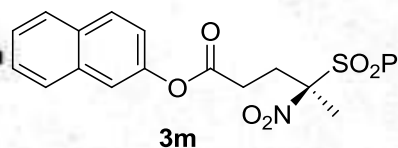

Acquired : 5/11/2013 7:27:38 PM  
 Processed : 5/11/2013 8:43:04 PM  
 Printed : 5/11/2013 8:43:14 PM

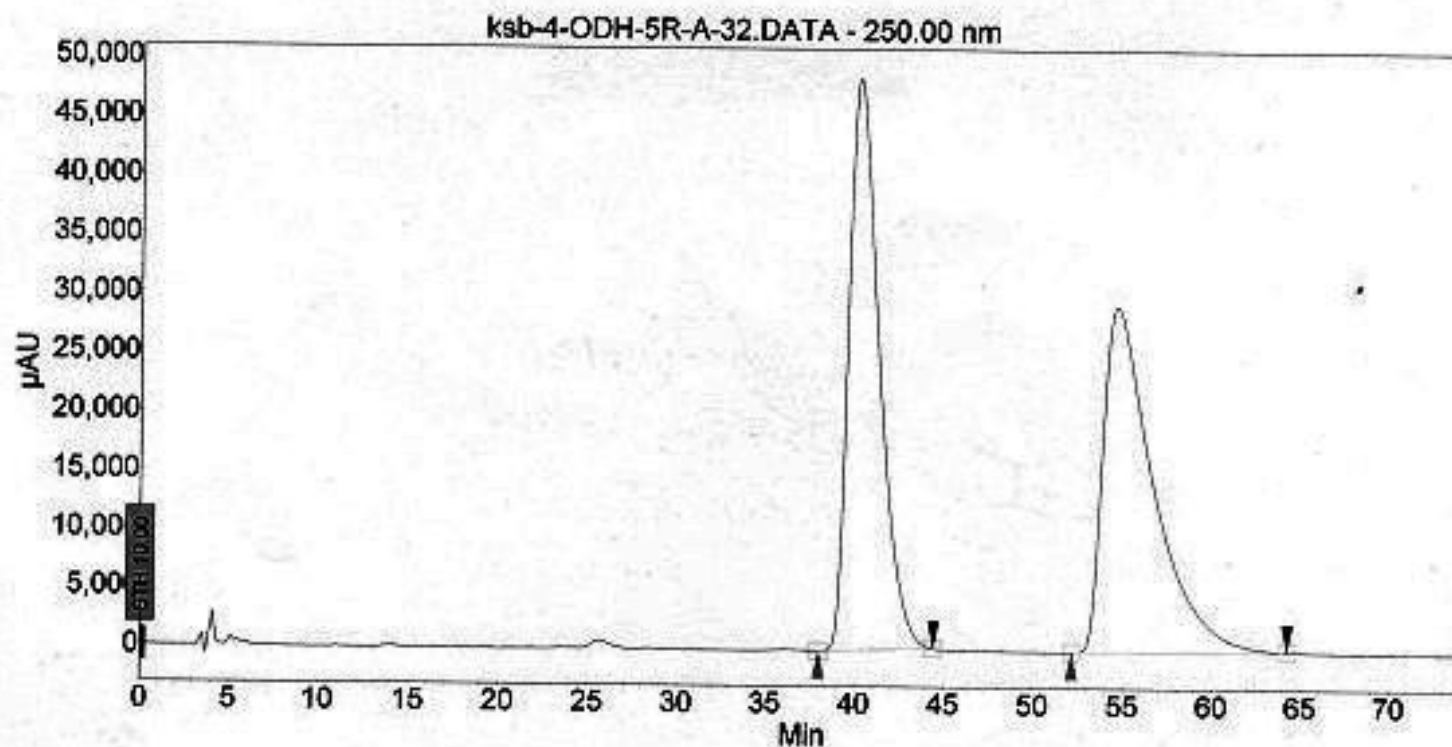

## Peak results :

| Index | Name    | Time [Min] | Quantity [% Area] | Height [μAU] | Area [μAU.Min] | Area % [%] |
|-------|---------|------------|-------------------|--------------|----------------|------------|
| 1     | UNKNOWN | 40.132     | 50.15             | 48430.9      | 96299.5        | 50.155     |
| 2     | UNKNOWN | 54.580     | 49.85             | 29327.0      | 95705.7        | 49.845     |
| Total |         |            | 100.00            | 77757.9      | 192005.2       | 100.000    |

Fig S60. HPLC Profile of Racemic 3m



# Chromatogram : ksb-4-ODH-1r-A-64\_channel2

System : Jasco HPLC  
Method : ksb-30%-1f-250nm  
User : User1

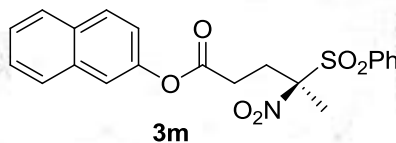

Acquired : 5/11/2013 4:52:43 PM  
Processed : 5/11/2013 6:04:25 PM  
Printed : 5/11/2013 6:05:48 PM

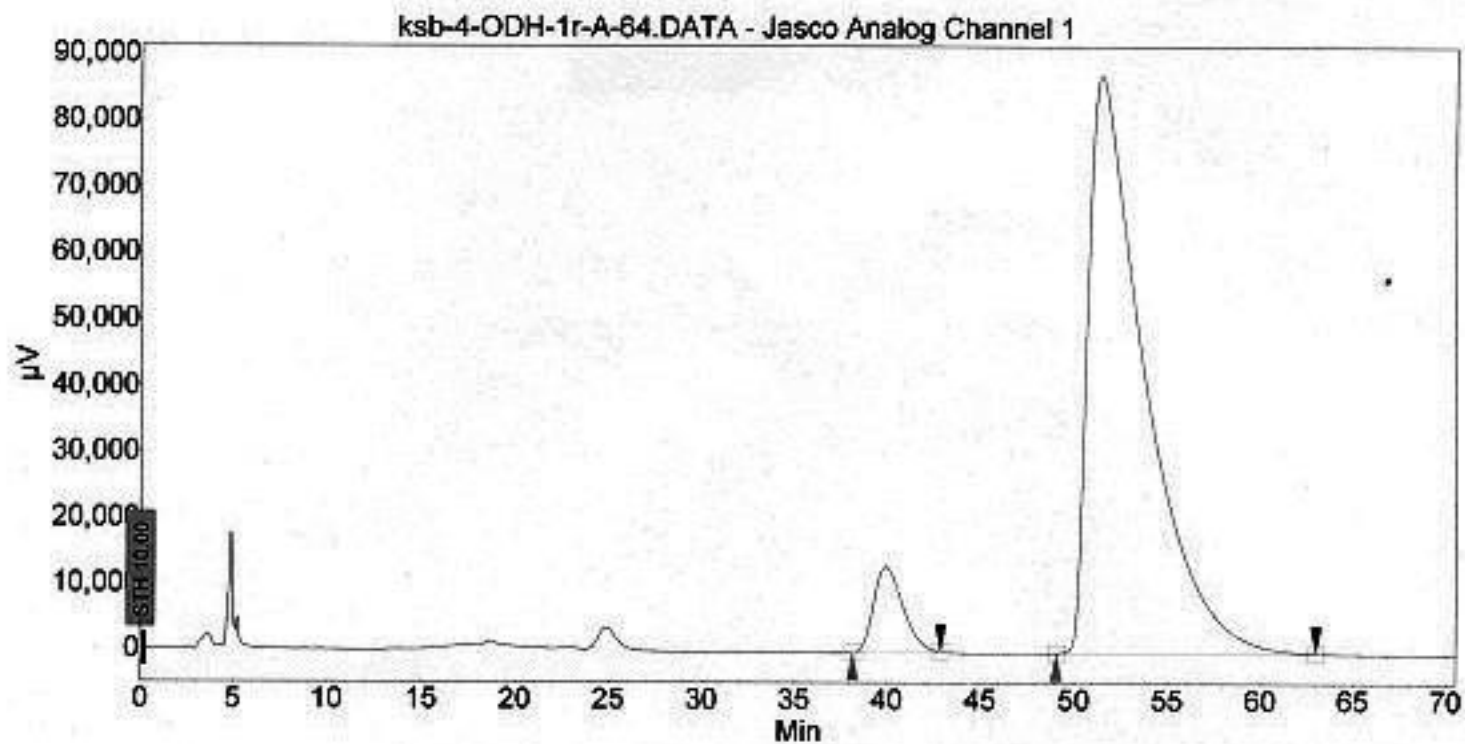

## Peak results :

| Index | Name    | Time [Min] | Quantity [% Area] | Height [µV] | Area [µV/Min] | Area % [%] |
|-------|---------|------------|-------------------|-------------|---------------|------------|
| 1     | UNKNOWN | 39.908     | 7.22              | 13095.3     | 23859.9       | 7.222      |
| 2     | UNKNOWN | 51.375     | 92.78             | 87251.6     | 308511.0      | 92.778     |
| Total |         |            | 100.00            | 100346.9    | 330370.9      | 100.000    |

Fig S61. HPLC Profile of Enantioenriched 3m

```

NAME      INN-4-KSB-32B-1H
EXPNO     1
PROCNO    1
Date_     20130219
Time      20.45
INSTRUM   spect
PROBHD    5 mm PABBO BB-
PULPROG   zg30
TD         65536
SOLVENT   CDCl3
NS         16
DS         0
SWH        6223.685 Hz
FIDRES     0.125483 Hz
AQ         3.9846387 sec
RG         32
DW         60.800 usec
DE         6.50 usec
TE         294.3 K
D1         1.00000000 sec
TD0        1

```

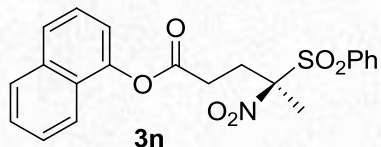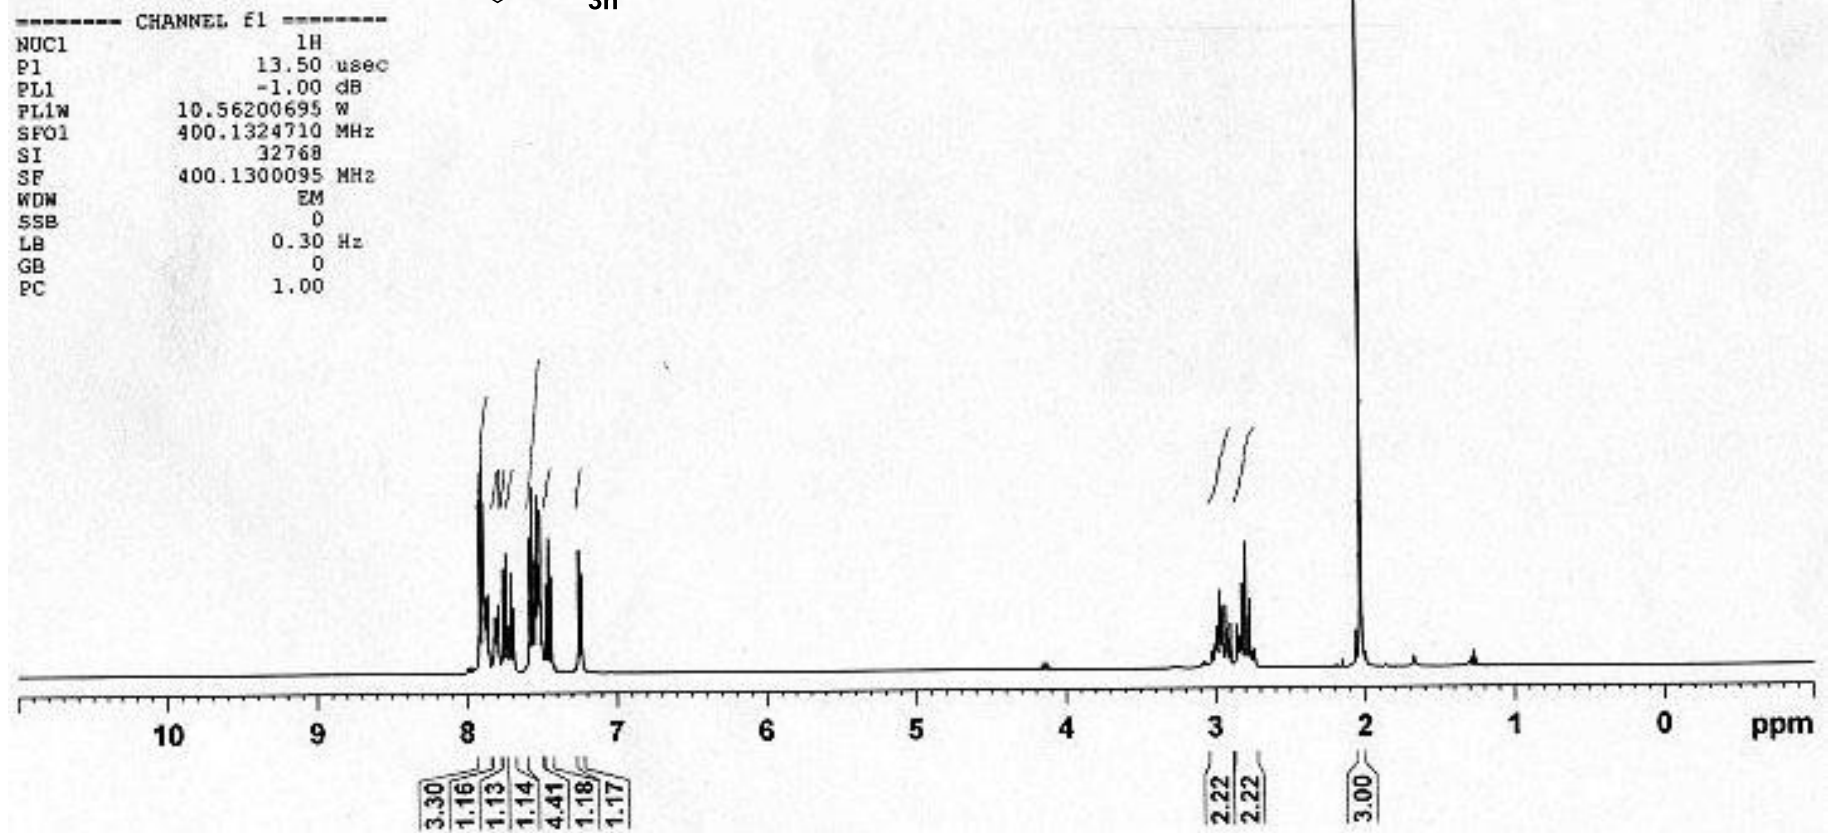

Fig S62. <sup>1</sup>H NMR Spectrum of 3n

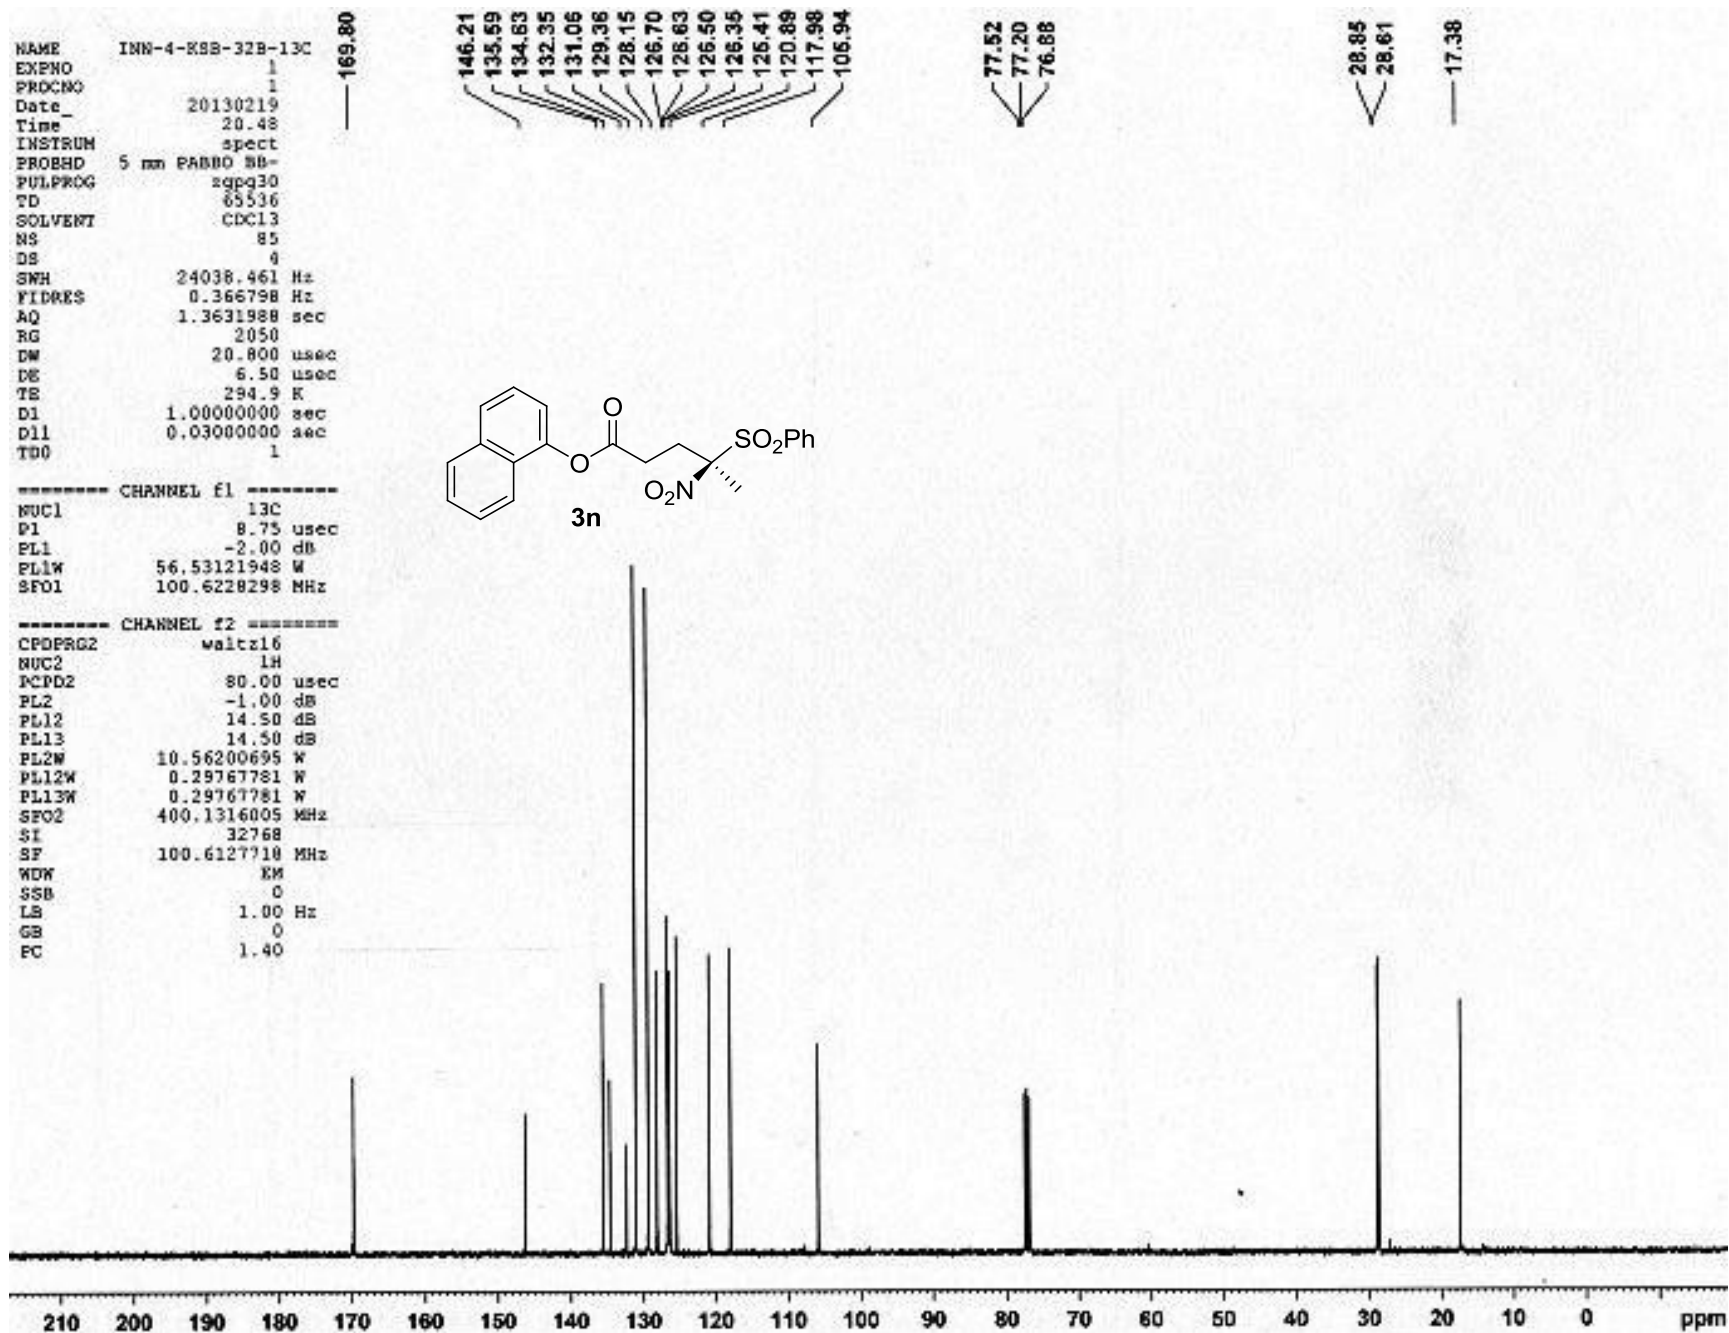

Fig S63. <sup>13</sup>C NMR Spectrum of 3n

# Chromatogram : ksb-4-ODH-5R-B-32\_channel2

System : Jasco HPLC  
Method : ksb-10%-05f-250nm  
User : User1

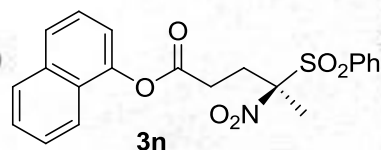

Acquired : 5/10/2013 3:19:58 PM  
Processed : 5/10/2013 6:03:45 PM  
Printed : 5/10/2013 6:04:01 PM

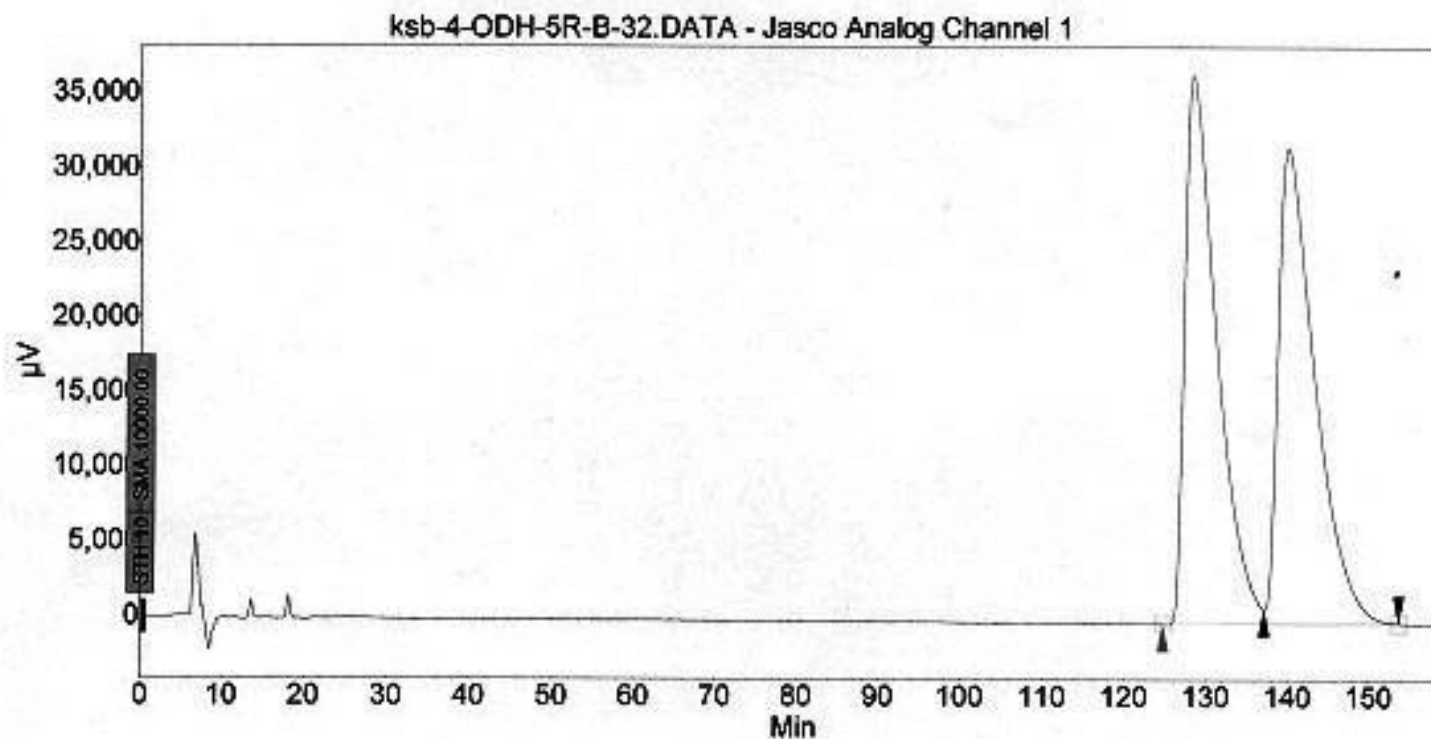

## Peak results :

| Index | Name    | Time [Min] | Quantity [% Area] | Height [μV] | Area [μV.Min] | Area % [%] |
|-------|---------|------------|-------------------|-------------|---------------|------------|
| 1     | UNKNOWN | 128.358    | 49.92             | 36620.9     | 166626.9      | 49.920     |
| 2     | UNKNOWN | 140.000    | 50.08             | 31803.4     | 167163.4      | 50.080     |
| Total |         |            | 100.00            | 68424.4     | 333790.3      | 100.000    |

Fig S64. HPLC Profile of Racemic 3n

# Chromatogram : ksb-4-ODH-1r-B-64\_channel2

System : Jasco HPLC  
Method : ksb-10%-05f-250nm  
User : User1

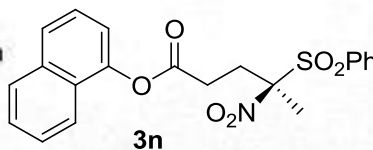

Acquired : 5/7/2013 1:27:17 PM  
Processed : 5/7/2013 4:34:44 PM  
Printed : 5/7/2013 4:48:00 PM

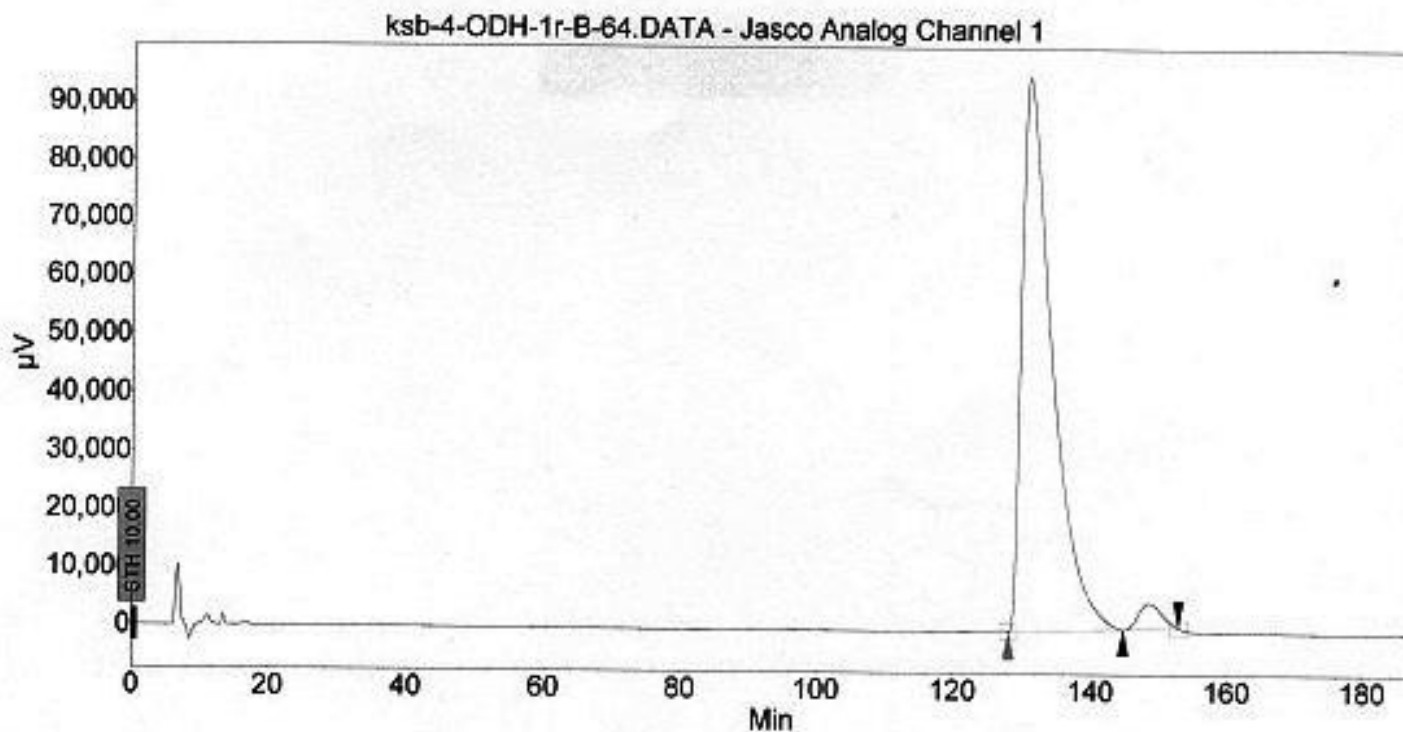

## Peak results :

| Index | Name    | Time [Min] | Quantity [% Area] | Height [μV] | Area [μV.Min] | Area % [%] |
|-------|---------|------------|-------------------|-------------|---------------|------------|
| 1     | UNKNOWN | 130.692    | 96.59             | 95206.1     | 488193.3      | 96.590     |
| 2     | UNKNOWN | 148.475    | 3.41              | 4417.7      | 17237.1       | 3.410      |
| Total |         |            | 100.00            | 99623.8     | 505430.4      | 100.000    |

Fig S65. HPLC Profile of Enantioenriched 3n

NAME INN-4-KSB-74-A-1H  
 EXPNO 17  
 PROCNO 1  
 Date 20130524  
 Time 17.09  
 INSTRUM spect  
 PROBHD 5 mm PABBO BB-  
 PULPROG zg30  
 TD 66962  
 SOLVENT CDC13  
 NS 11  
 DS 0  
 SWH 11160.714 Hz  
 FIDRES 0.166672 Hz  
 AQ 2.9999475 sec  
 RG 32  
 DW 44.800 usec  
 DE 6.50 usec  
 TE 294.6 K  
 D1 1.00000000 sec  
 TDO 1

===== CHANNEL f1 =====  
 NUC1 1H  
 P1 13.50 usec  
 PL1 -1.00 dB  
 PL1W 10.56200695 W  
 SFO1 400.1332010 MHz  
 SI 32768  
 SF 400.1300092 MHz  
 WDM EM  
 SSB 0  
 LB 0.30 Hz  
 GB 0  
 PC 1.00

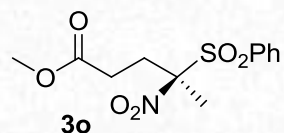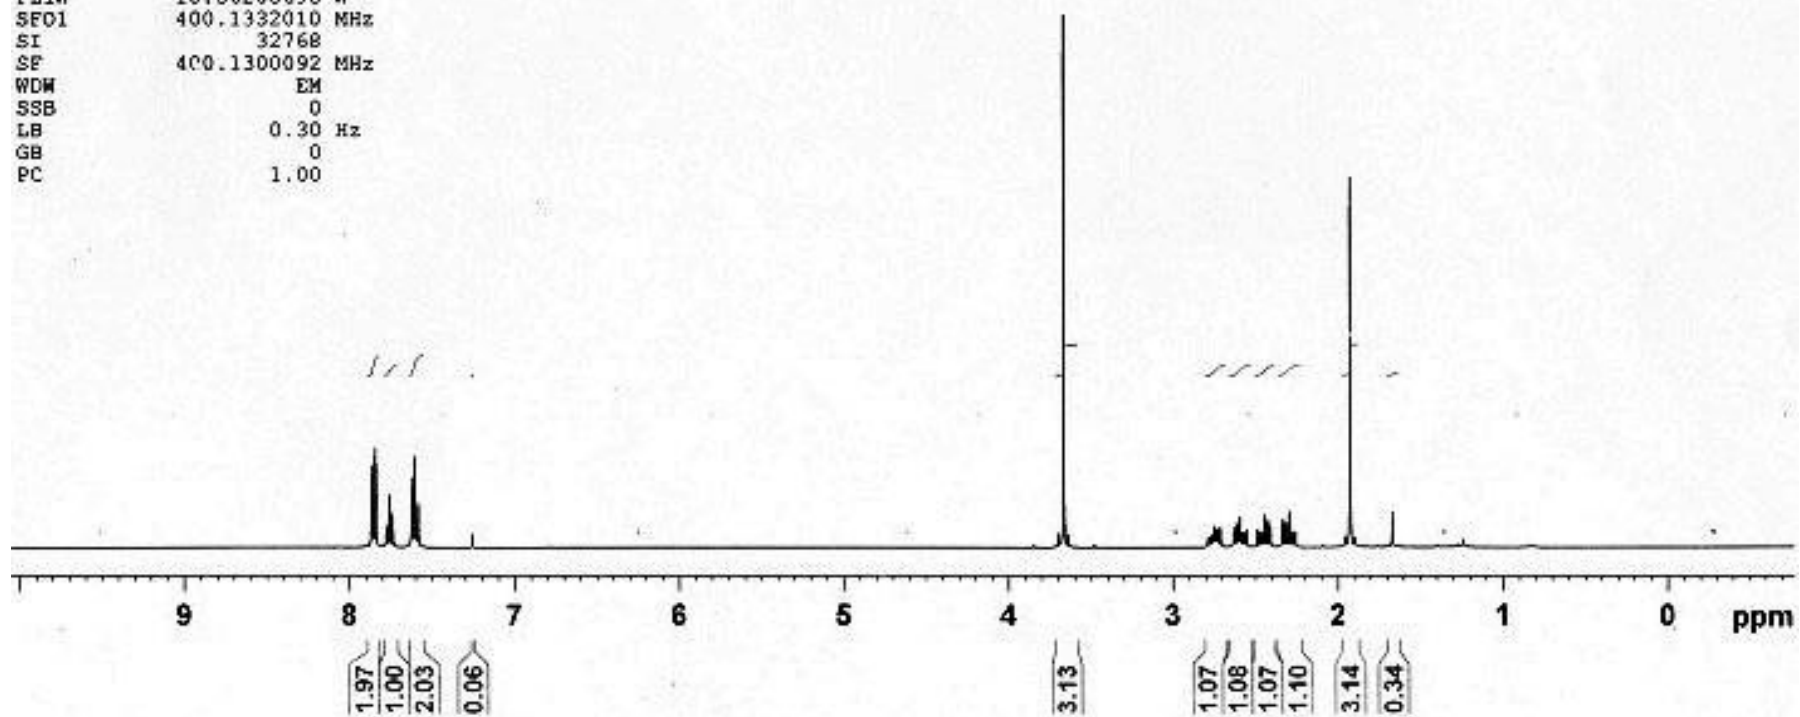

Fig S66. <sup>1</sup>H NMR Spectrum of 3o

NAME \* INN-9-KSB-74-A-13C  
 EXPNO 18  
 PROCNO 1  
 Date 20130524  
 Time 17.11  
 INSTRUM spect  
 PROSHD 5 mm PABBO BR-  
 PULPROG zgpg30  
 TD 65536  
 SOLVENT CDCl3  
 NS 46  
 DS 2  
 SWH 27777.777 Hz  
 FIDRES 0.423855 Hz  
 AQ 1.1796980 sec  
 RG 2050  
 DW 18.000 usec  
 DE 6.50 usec  
 TE 295.1 K  
 D1 1.00000000 sec  
 D11 0.03000000 sec  
 TDO 1

===== CHANNEL f1 =====  
 NUC1 13C  
 P1 8.75 usec  
 PL1 -2.00 dB  
 PL1W 56.53121948 W  
 SFO1 100.6242389 MHz

===== CHANNEL f2 =====  
 CPDPRG2 waltz16  
 NUC2 1H  
 PCPD2 80.00 usec  
 PL2 -1.00 dB  
 PL12 14.50 dB  
 PL13 14.50 dB  
 PL2W 10.56200695 W  
 PL12W 0.29767781 W  
 PL13W 0.29767781 W  
 SFO2 400.1316005 MHz  
 SI 32768  
 SF 100.6127564 MHz  
 WDW EM  
 SSB 0  
 LB 1.00 Hz  
 GB 0  
 PC 1.40

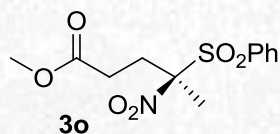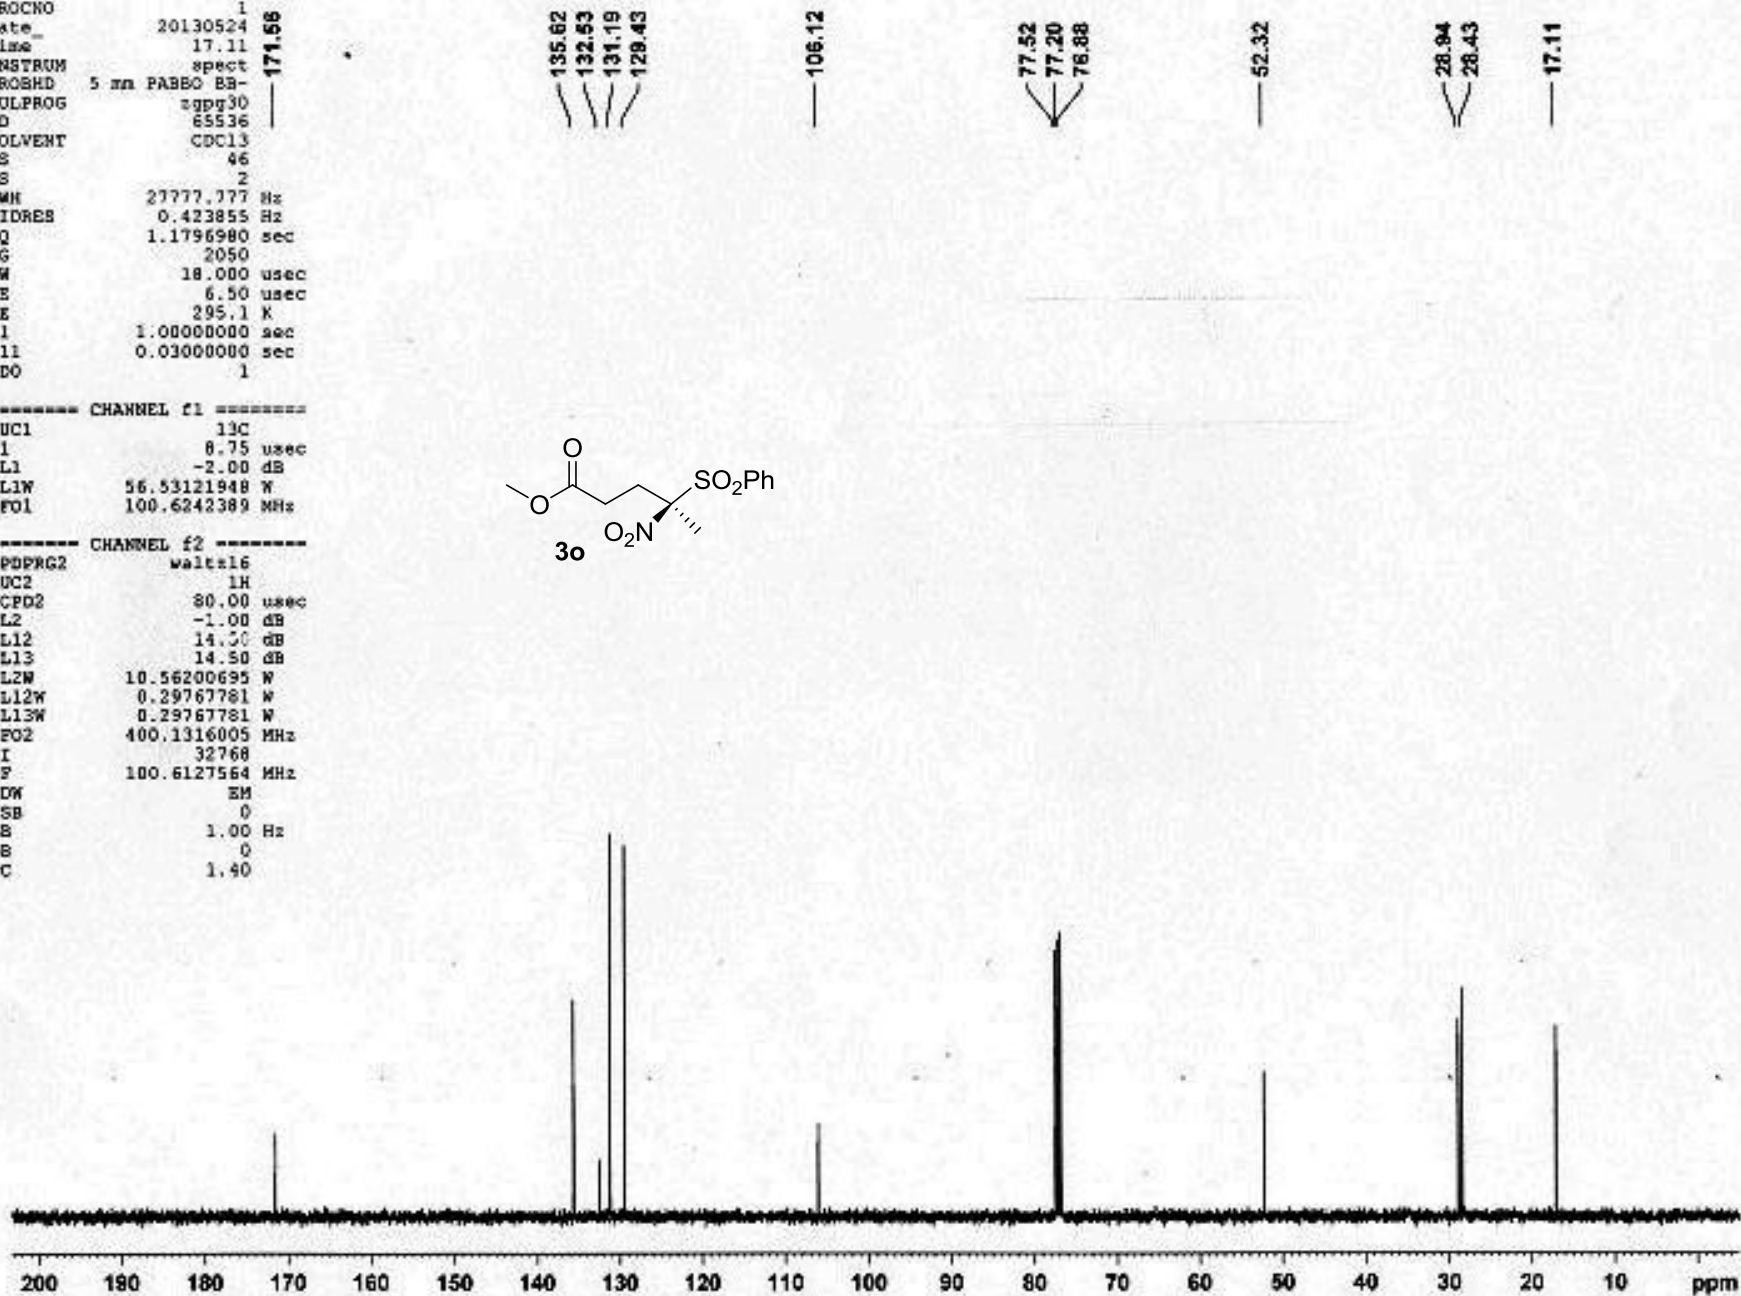

Fig SS67. <sup>13</sup>C NMR Spectrum of 3o

# Chromatogram : ksb-4-ODH-2R-A-74\_channel5

System : Jasco HPLC  
Method : ksb-10%-05f-250nm  
User : User1

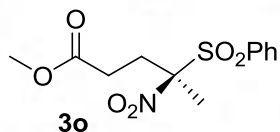

Acquired : 5/24/2013 12:11:57 PM  
Processed : 5/24/2013 2:40:40 PM  
Printed : 5/24/2013 2:40:48 PM

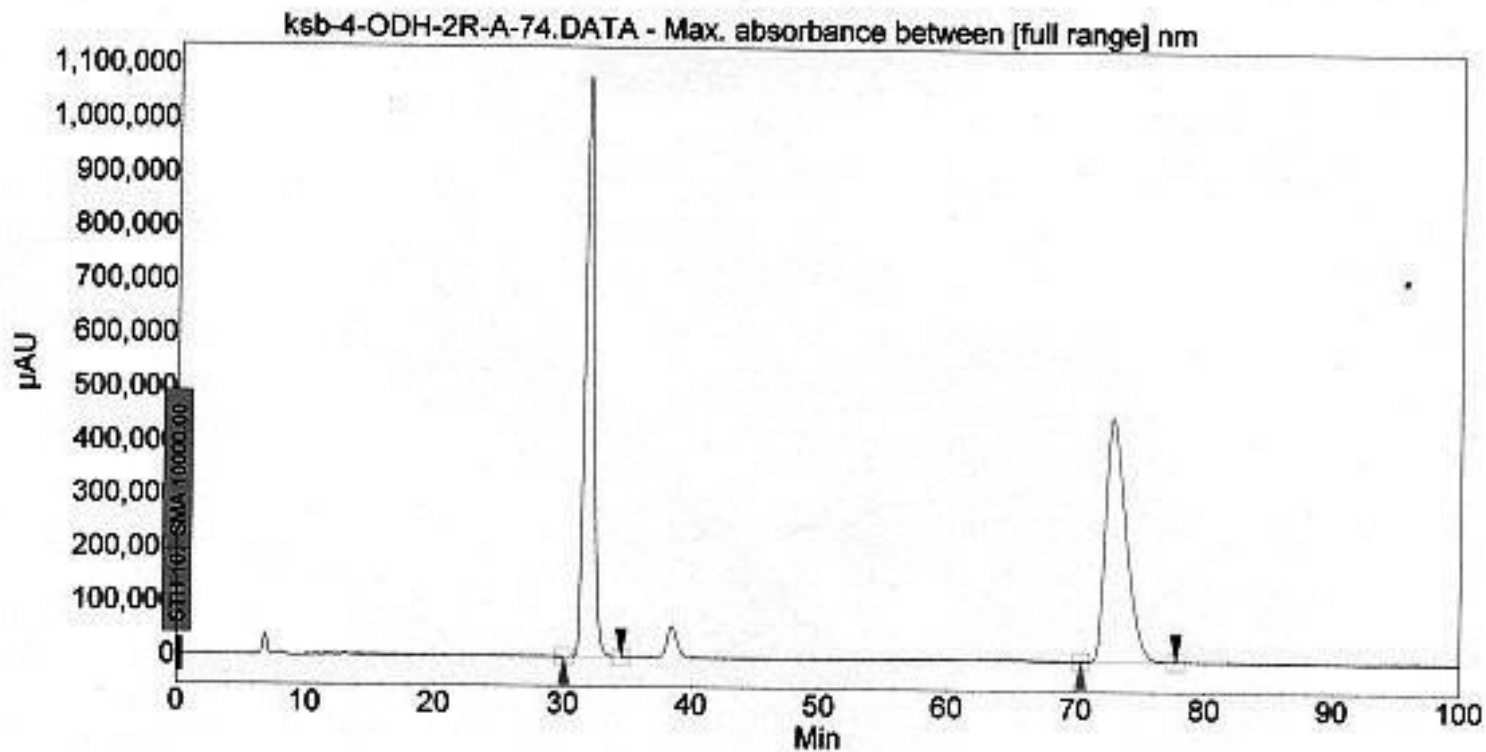

## Peak results :

| Index | Name    | Time [Min] | Quantity [% Area] | Height [AU] | Area [AU.Min] | Area % [%] |
|-------|---------|------------|-------------------|-------------|---------------|------------|
| 2     | UNKNOWN | 31.757     | 50.48             | 1080311.9   | 855642.3      | 50.480     |
| 1     | UNKNOWN | 72.732     | 49.52             | 454920.9    | 839369.4      | 49.520     |
| Total |         |            | 100.00            | 1535232.8   | 1695011.7     | 100.000    |

Fig S68. HPLC Profile of Racemic 3o



# Chromatogram : ksb-4-ODH-1r-A-73\_channel5

System : Jasco HPLC  
 Method : ksb-10%-05f-250nm  
 User : User1

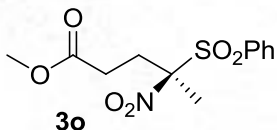

Acquired : 5/24/2013 10:11:16 AM  
 Processed : 5/24/2013 12:14:01 PM  
 Printed : 5/24/2013 12:14:12 PM

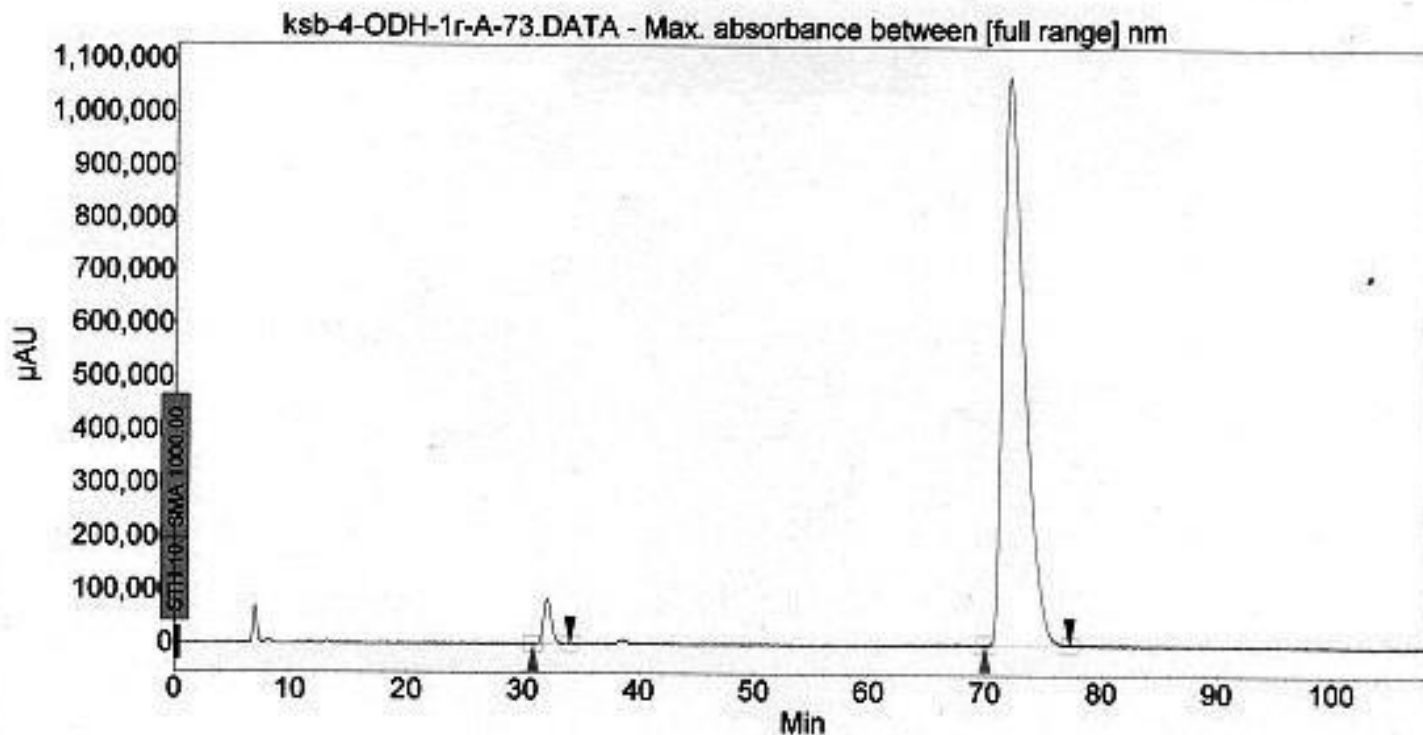

## Peak results :

| Index | Name    | Time [Min] | Quantity [% Area] | Height [μAU] | Area [μAU.Min] | Area % [%] |
|-------|---------|------------|-------------------|--------------|----------------|------------|
| 2     | UNKNOWN | 32.055     | 2.67              | 84682.8      | 66184.9        | 2.874      |
| 1     | UNKNOWN | 71.881     | 97.13             | 1069963.6    | 2237037.9      | 97.126     |
| Total |         |            | 100.00            | 1154646.4    | 2303222.9      | 100.000    |

Fig S69. HPLC Profile of Enantioenriched 3o

NAME INN-4-KSB-66C-1H  
 EXPNO 4  
 PROCNO 1  
 Date 20130516  
 Time 18.52  
 INSTRUM spect  
 PROBHD 5 mm F4BBO BB-  
 PULPROG zg30  
 TD 65536  
 SOLVENT CDCl3  
 NS 9  
 DS 0  
 SWH 8223.685 Hz  
 FIDRES 0.125483 Hz  
 AQ 3.9846387 sec  
 RG 32  
 DW 60.800 usec  
 DE 6.50 usec  
 TE 294.6 K  
 D1 1.00000000 sec  
 TD0 1

----- CHANNEL f1 -----  
 NUC1 1H  
 P1 13.50 usec  
 PL1 -1.00 dB  
 PL1W 10.56200695 W  
 SF01 400.1324710 MHz  
 SI 32768  
 SF 400.1300095 MHz  
 WDW EM  
 SSB 0  
 LB 0.30 Hz  
 GB 0  
 PC 1.00

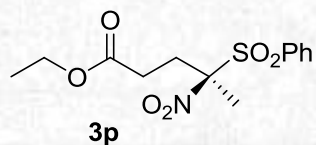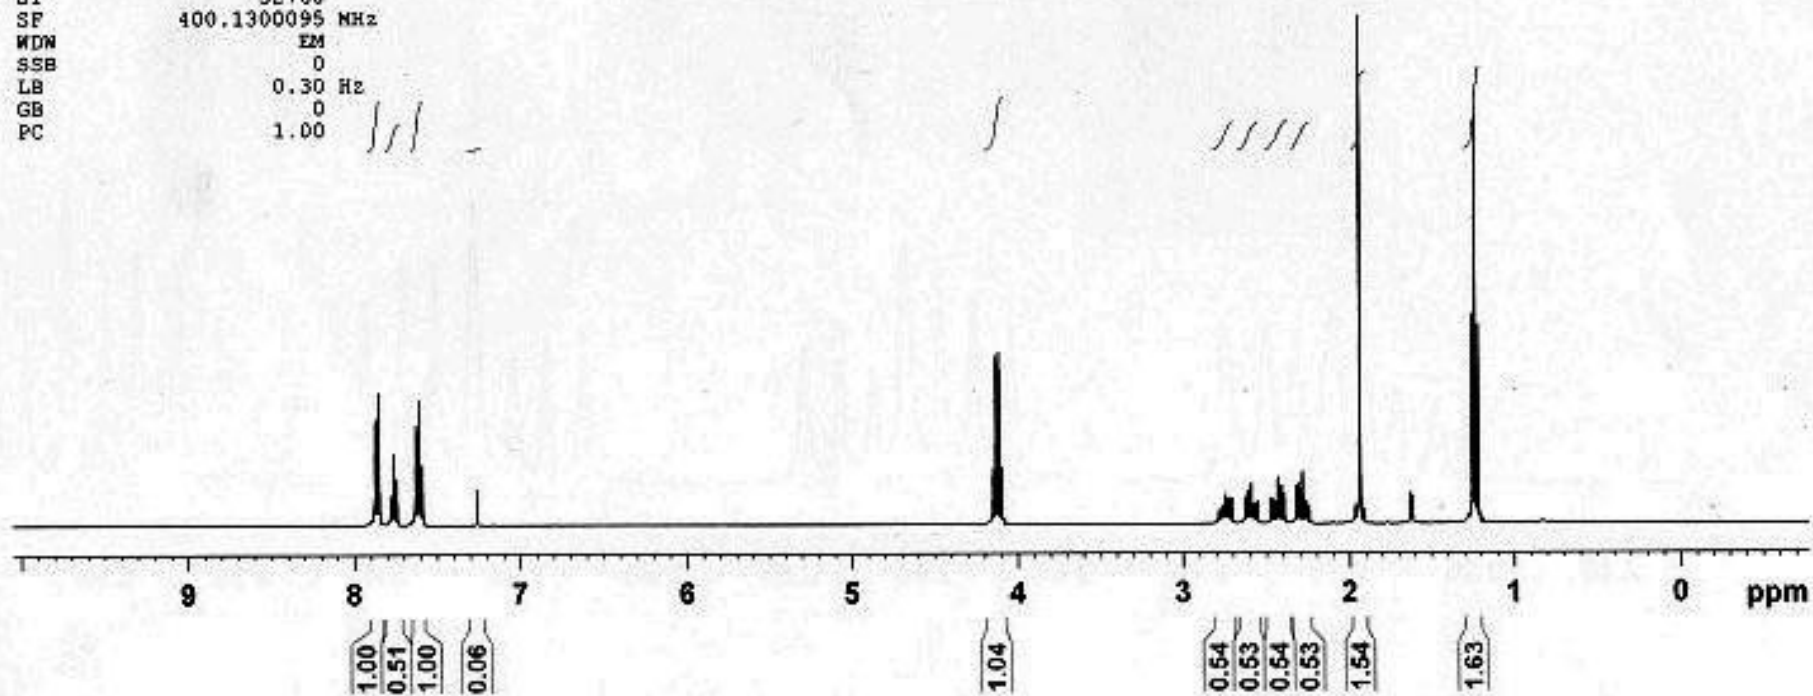

Fig S70. <sup>1</sup>H NMR Spectrum of 3p

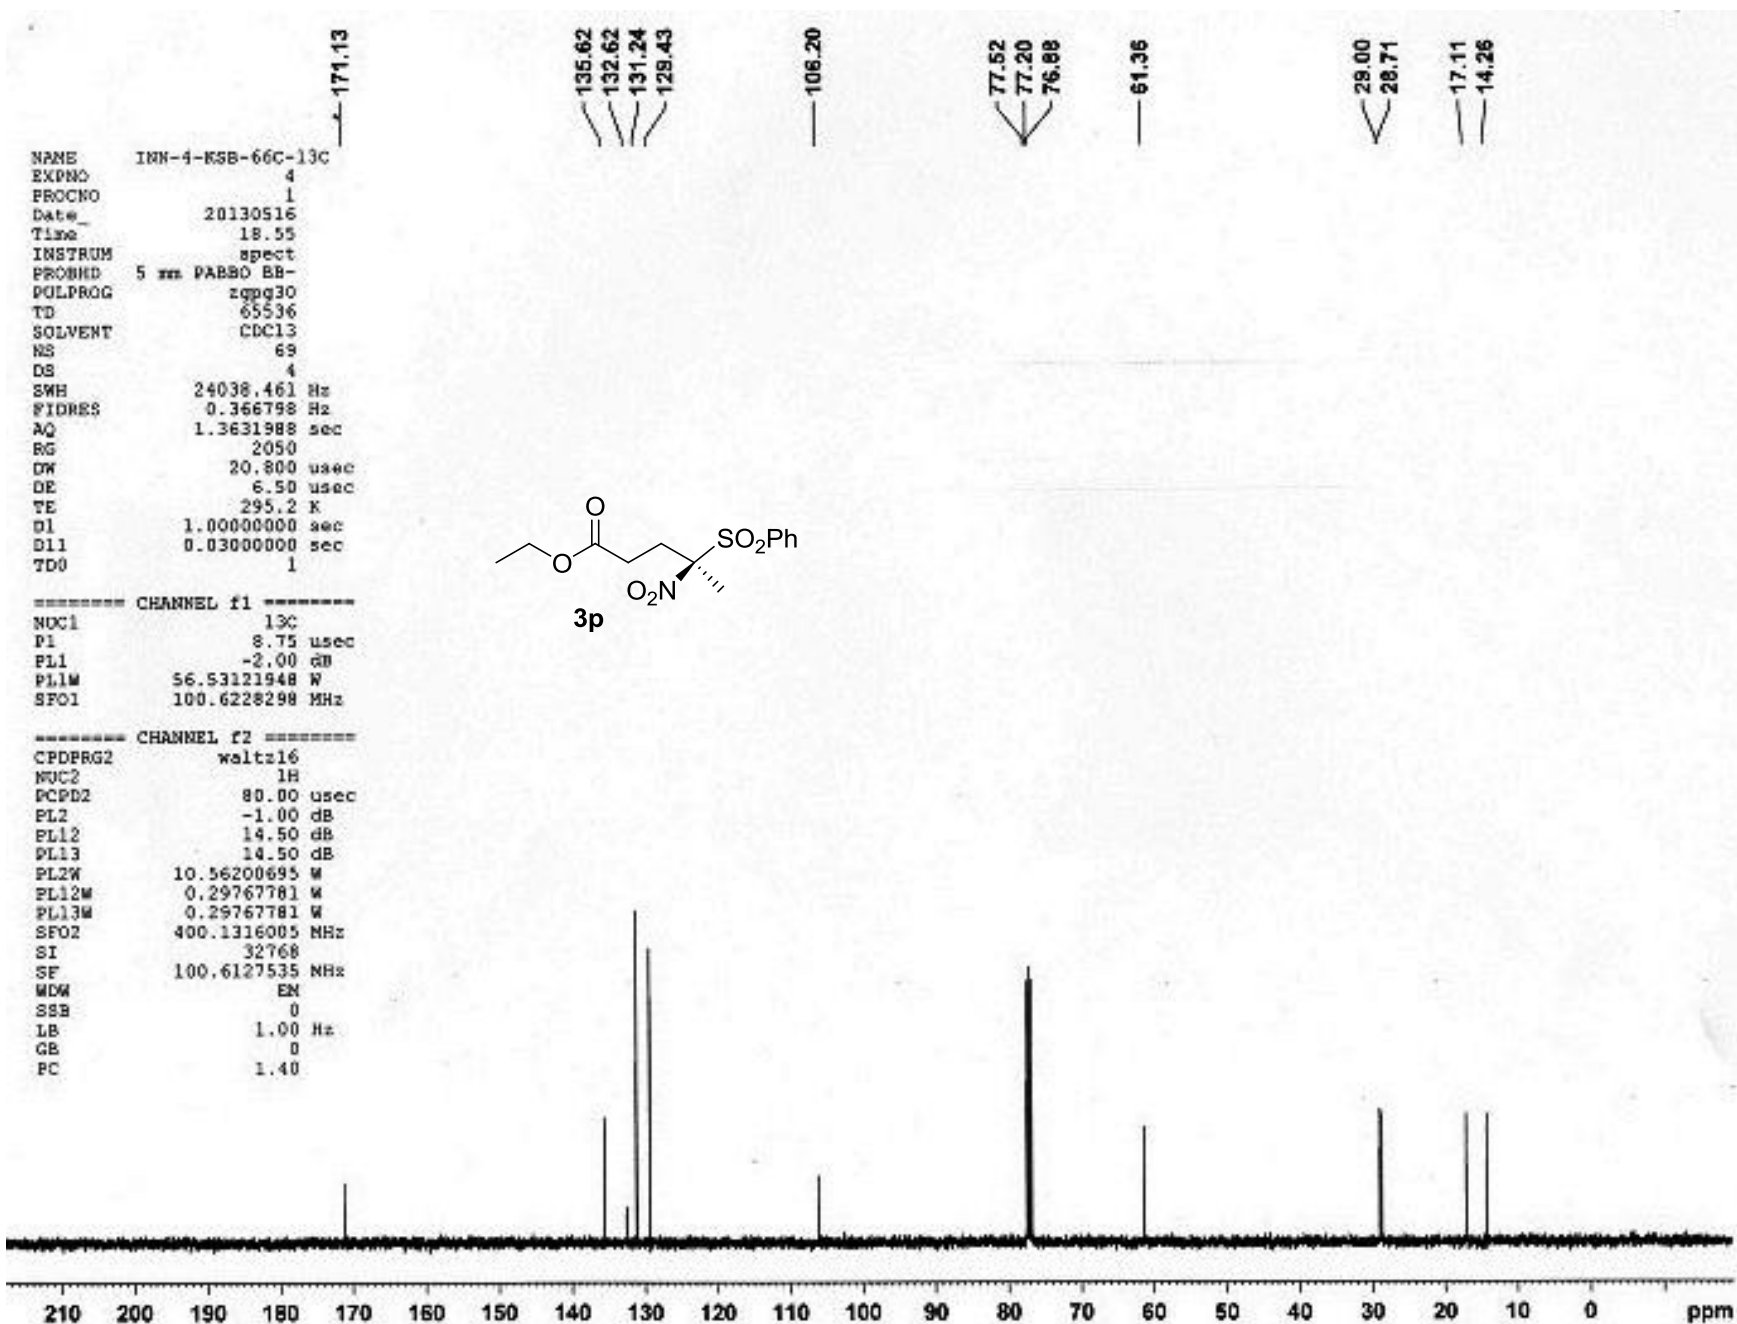

Fig S71. <sup>13</sup>C NMR Spectrum of 3p

# Chromatogram : ksb-4-ODH-1r-C-66\_channel2

System : Jasco HPLC  
 Method : ksb-10%-05f-250nm  
 User : User1

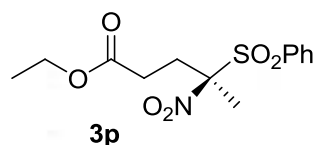

Acquired : 5/16/2013 5:10:34 PM  
 Processed : 5/16/2013 6:37:15 PM  
 Printed : 5/16/2013 6:37:32 PM

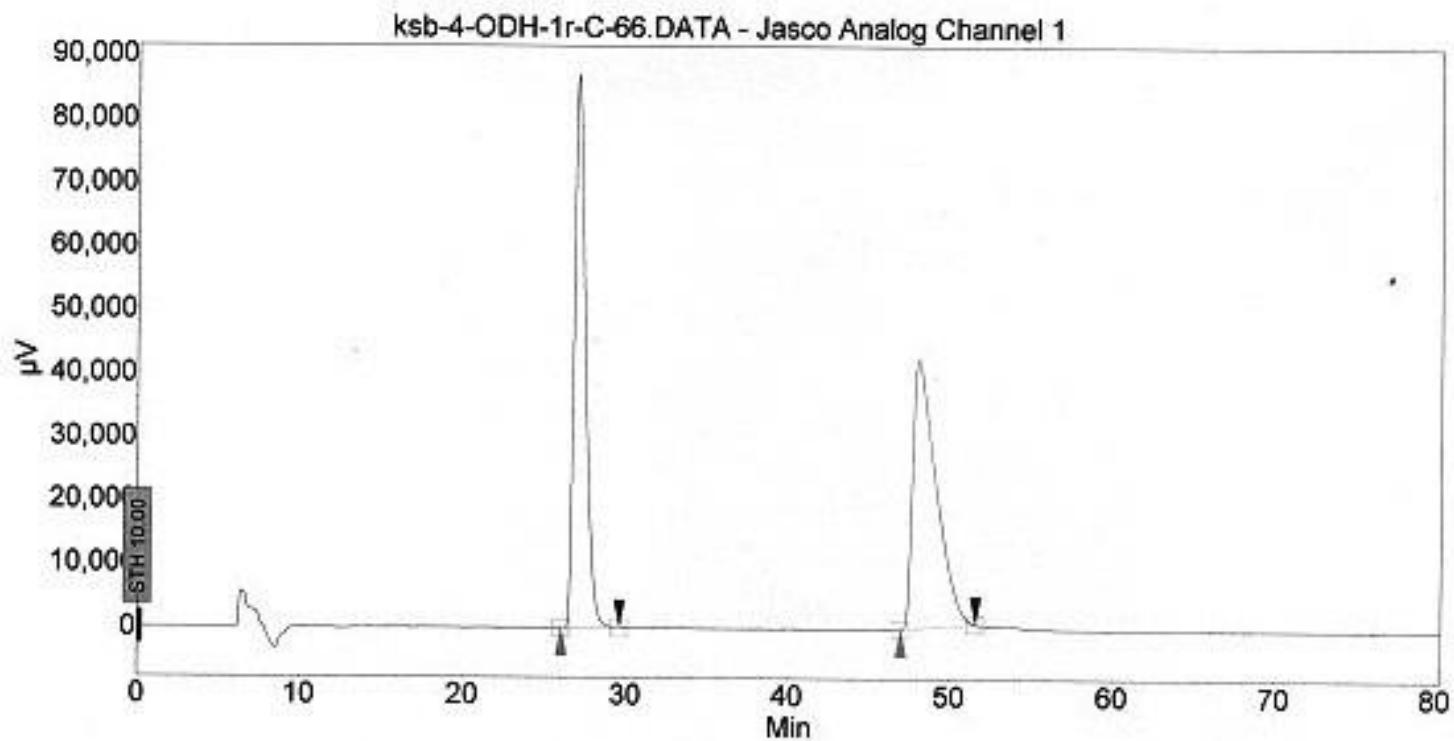

## Peak results :

| Index | Name    | Time [Min] | Quantity [% Area] | Height [µV] | Area [µV.Min] | Area % [%] |
|-------|---------|------------|-------------------|-------------|---------------|------------|
| 1     | UNKNOWN | 26.958     | 49.80             | 86860.4     | 69678.4       | 49.804     |
| 2     | UNKNOWN | 48.067     | 50.20             | 42293.3     | 70225.9       | 50.196     |
| Total |         |            | 100.00            | 129153.7    | 139904.3      | 100.000    |

Fig S72. HPLC Profile of Racemic 3p

# Chromatogram : ksb-4-ODH-1r-B-66\_channel4

System : Jasco HPLC  
Method : ksb-10%-05f-250nm  
User : User1

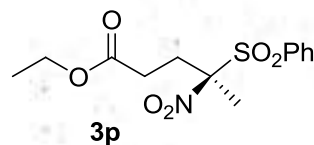

Acquired : 5/16/2013 6:42:35 PM  
Processed : 5/16/2013 7:45:44 PM  
Printed : 5/16/2013 7:47:09 PM

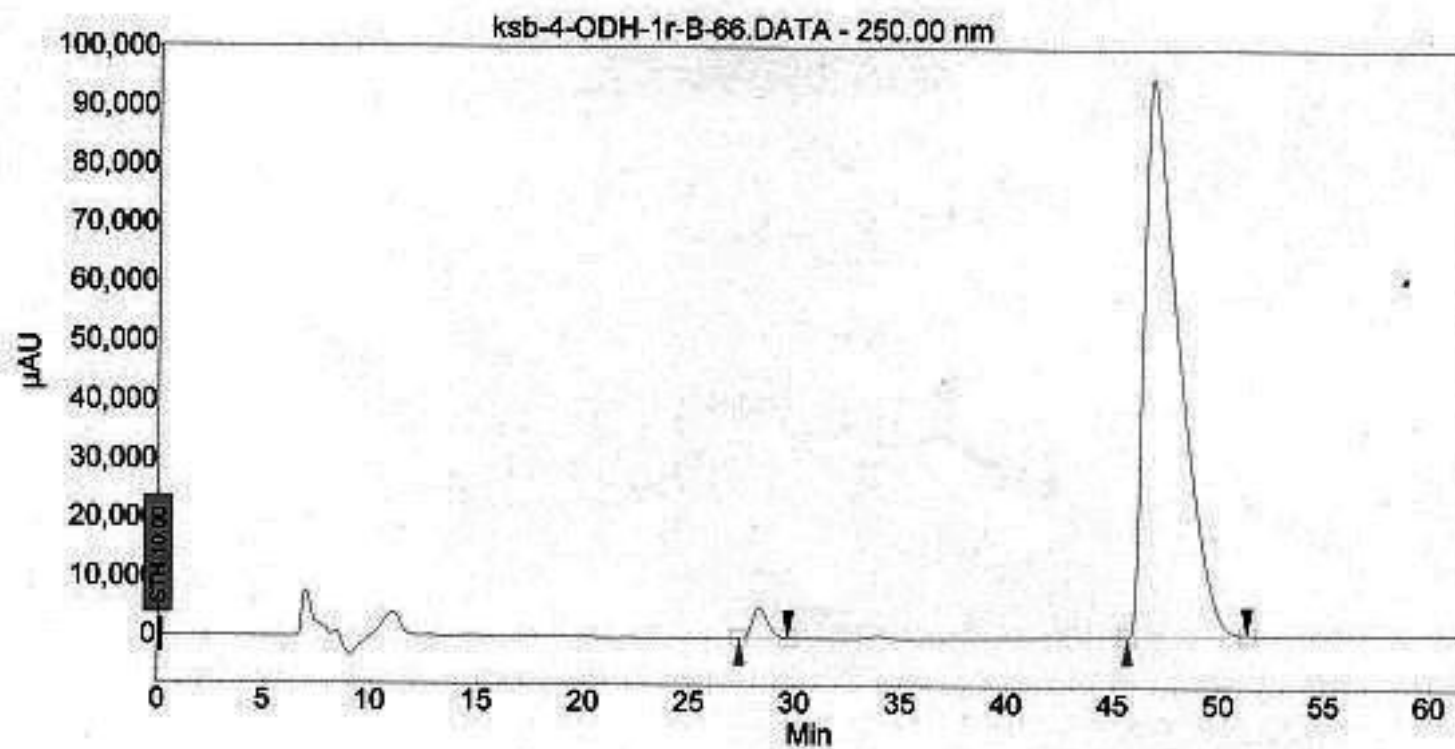

## Peak results :

| Index | Name    | Time [Min] | Quantity [% Area] | Height [µAU] | Area [µAU.Min] | Area % [%] |
|-------|---------|------------|-------------------|--------------|----------------|------------|
| 1     | UNKNOWN | 28.318     | 2.38              | 5265.7       | 4346.8         | 2.375      |
| 2     | UNKNOWN | 46.730     | 97.62             | 94720.4      | 178668.7       | 97.625     |
| Total |         |            | 100.00            | 99986.1      | 183015.5       | 100.000    |

Fig S73. HPLC Profile of Enantioenriched 3p

NAME INN-4-MSB-B3A-1H  
 EXPNO 5  
 PROCNO 1  
 Date 20130613  
 Time 19.55  
 INSTRUM spect  
 PROBHD 5 mm PABBO BB-  
 PULPROG zg30  
 TD 65536  
 SOLVENT CDCl3  
 NS 5  
 DS 0  
 SWH 8223.685 Hz  
 FIDRES 0.125483 Hz  
 AQ 3.9846387 sec  
 RG 32  
 DW 60.800 usec  
 DE 6.50 usec  
 TE 294.5 K  
 D1 1.00000000 sec  
 TDO 1

----- CHANNEL f1 -----  
 NUC1 1H  
 P1 13.50 usec  
 PL1 -1.00 dB  
 PL1W 10.56200695 W  
 SFO1 400.1324710 MHz  
 SI 32768  
 SF 400.1300095 MHz  
 MDW EM  
 SSB 0  
 LB 0.30 Hz  
 GB 0  
 PC 1.00

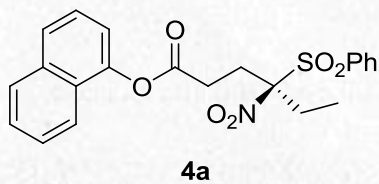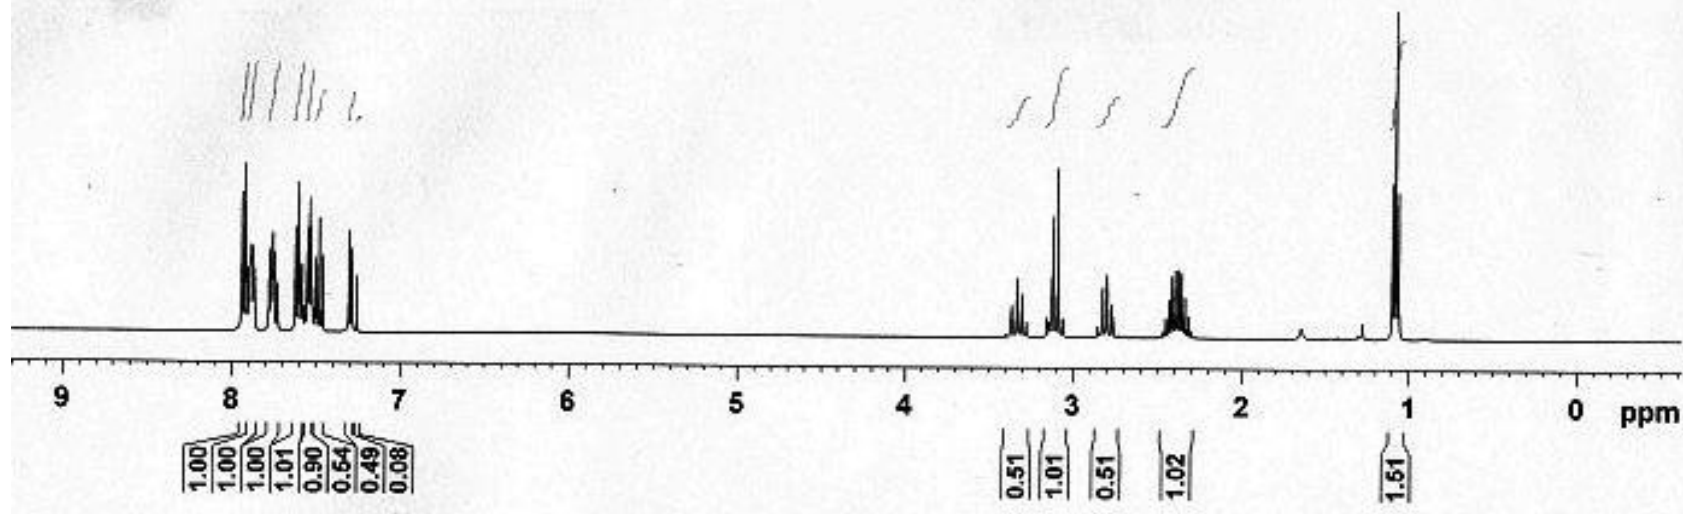

Fig S74. <sup>1</sup>H NMR Spectrum of 4a

NAME INN-4-KSB-83A-13C  
 EXPNO 5  
 PROCNO 1  
 Date\_ 20130613  
 Time 19.57  
 INSTRUM spect  
 PROBHD 5 mm PABBO BB-  
 PULPROG zgpg30  
 TD 65536  
 SOLVENT CDCl3  
 NS 50  
 DS 4  
 SWH 24038.461 Hz  
 FIDRES 0.366798 Hz  
 AQ 1.3631988 sec  
 RG 2050  
 DW 20.800 usec  
 DE 6.50 usec  
 TE 294.8 K  
 D1 1.00000000 sec  
 D11 0.03000000 sec  
 TD0 1

146.46  
 135.54  
 134.75  
 133.42  
 131.18  
 129.34  
 128.20  
 126.76  
 126.71  
 126.87  
 126.36  
 125.50  
 121.12  
 118.12  
 109.25

77.52  
 77.20  
 76.88

28.10  
 26.55  
 25.71

8.30

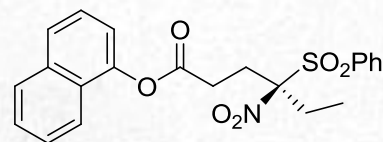

4a

===== CHANNEL f1 =====  
 NUC1 13C  
 P1 8.75 usec  
 PL1 -2.00 dB  
 PL1W 56.53121948 W  
 SFO1 100.6228298 MHz

===== CHANNEL f2 =====  
 CPDPRG2 waltz16  
 NUC2 1H  
 PCPD2 80.00 usec  
 PL2 -1.00 dB  
 PL12 14.50 dB  
 PL13 14.50 dB  
 PL2W 10.56200695 W  
 PL12W 0.29767781 W  
 PL13W 0.29767781 W  
 SFO2 400.1316005 MHz  
 SI 32768  
 SF 100.6127614 MHz  
 WDW EM  
 SSB 0  
 LB 1.00 Hz  
 GB 0  
 PC 1.40

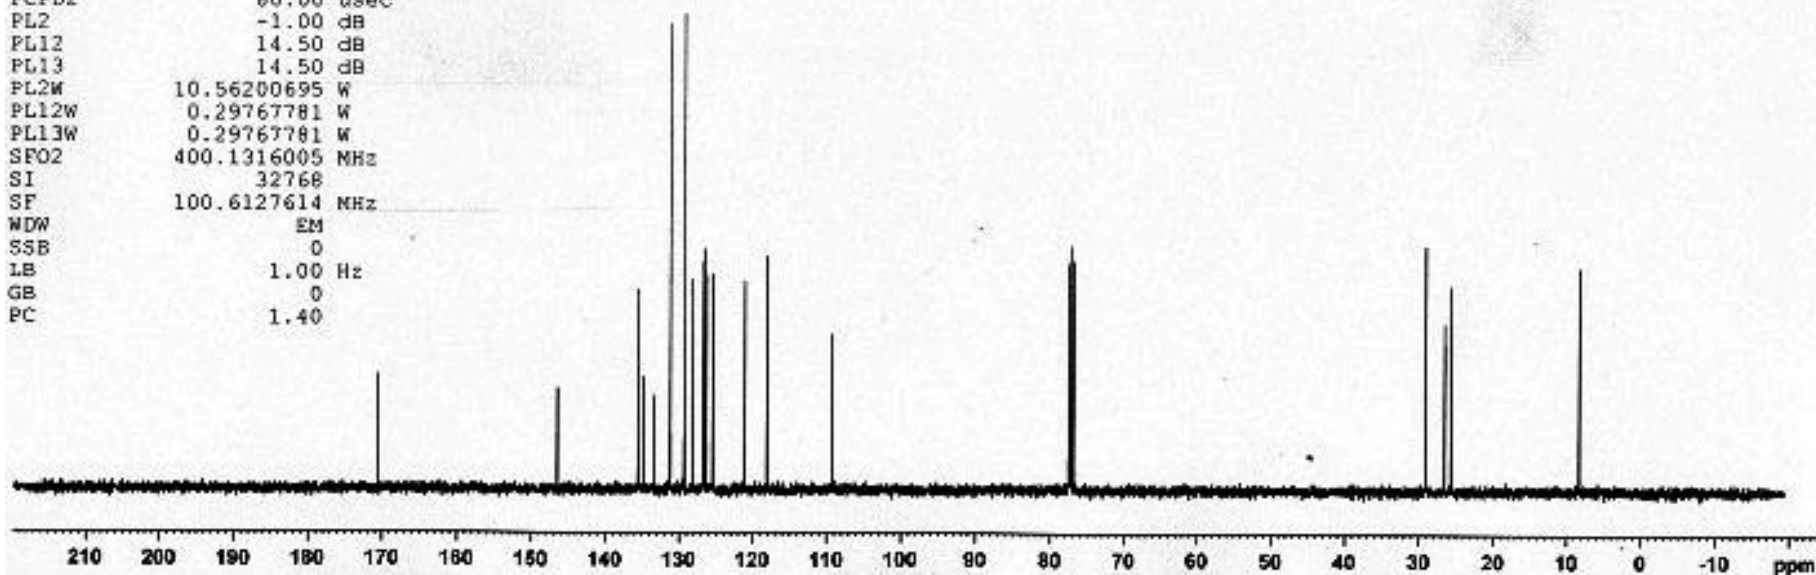

Fig S75. <sup>13</sup>C NMR Spectrum of 4a

# Chromatogram : ksb-4-CE1-2r-A-80\_channel4

System : Jasco HPLC  
Method : ksb-20%-1f-250nm  
User : User1

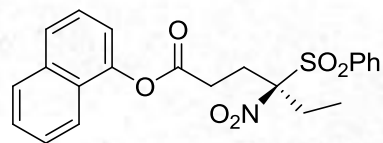

Acquired : 6/12/2013 4:03:10 PM  
Processed : 6/12/2013 5:34:37 PM  
Printed : 6/12/2013 5:34:45 PM

4a

ksb-4-CE1-2r-A-80.DATA - 250.00 nm

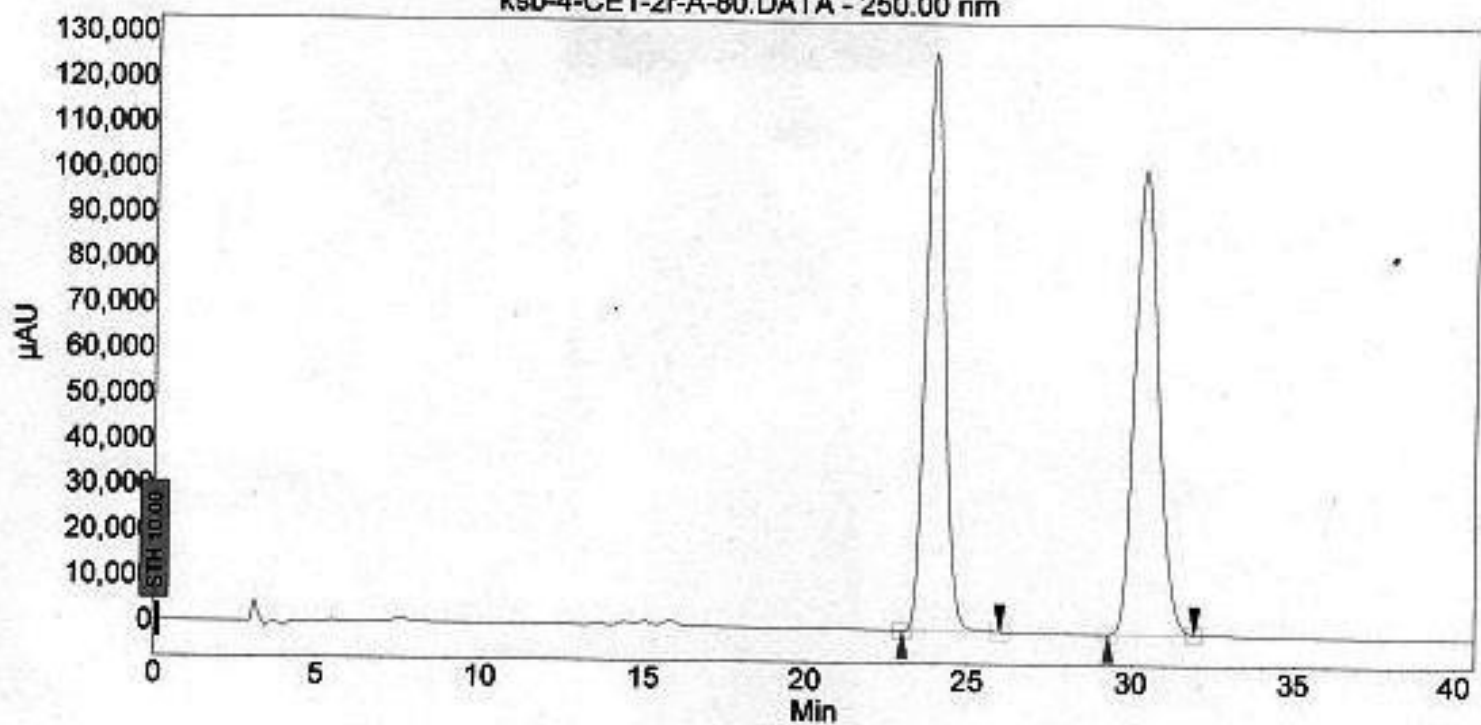

## Peak results :

| Index | Name    | Time [Min] | Quantity [% Area] | Height [μAU] | Area [μAU.Min] | Area % [%] |
|-------|---------|------------|-------------------|--------------|----------------|------------|
| 2     | UNKNOWN | 23.878     | 49.53             | 127526.8     | 84761.4        | 49.526     |
| 1     | UNKNOWN | 30.344     | 50.47             | 102311.2     | 86382.5        | 50.474     |
| Total |         |            | 100.00            | 229838.0     | 171143.8       | 100.000    |

Fig S76. HPLC Profile of Racemic 4a



# Chromatogram : ksb-4-CE1-2r-A-83\_channel2

System : Jasco HPLC  
Method : ksb-20%-1f-250nm  
User : User1

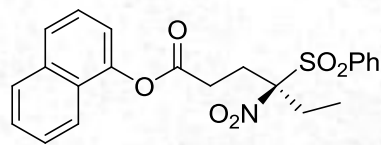

4a

Acquired : 6/12/2013 6:07:49 PM  
Processed : 6/12/2013 6:51:34 PM  
Printed : 6/12/2013 6:52:10 PM

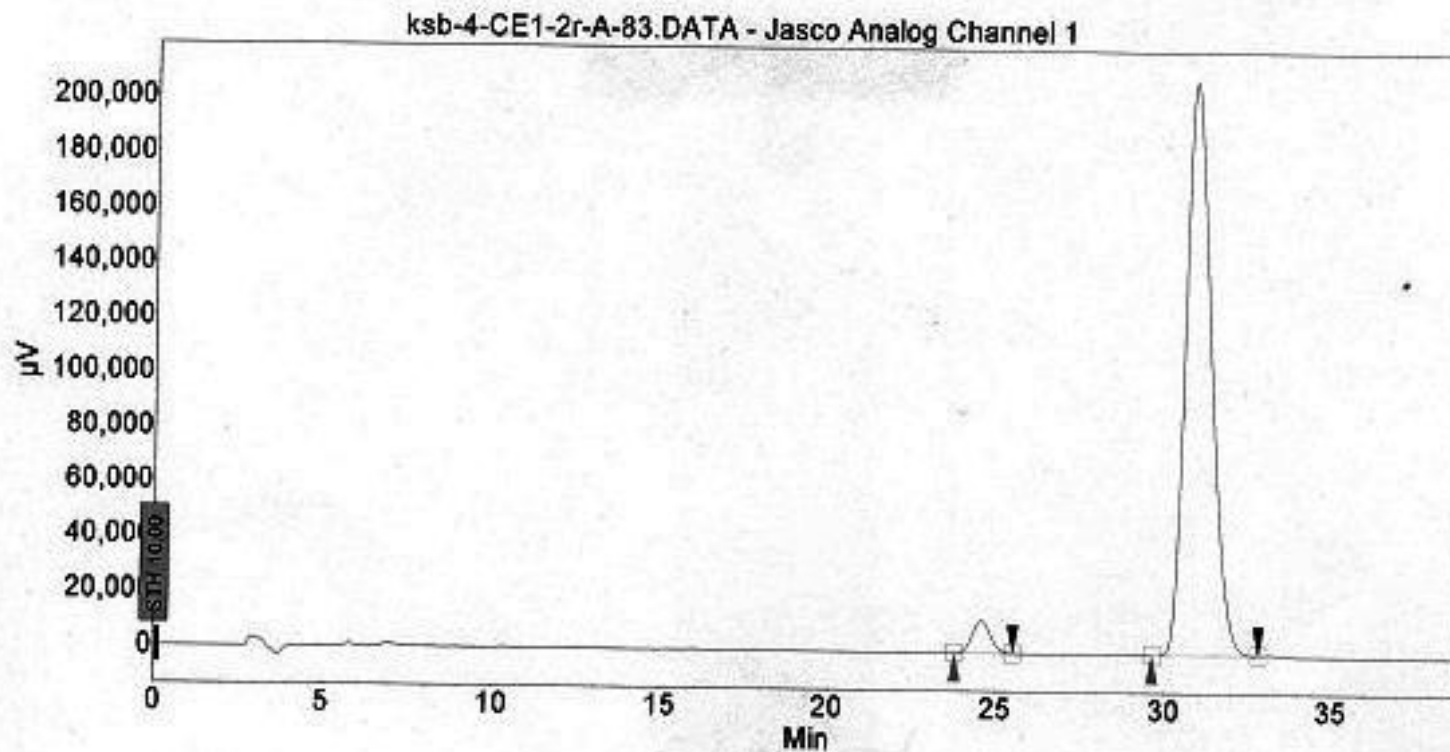

## Peak results :

| Index | Name    | Time [Min] | Quantity [% Area] | Height [µV] | Area [µV.Min] | Area % [%] |
|-------|---------|------------|-------------------|-------------|---------------|------------|
| 1     | UNKNOWN | 24.567     | 3.83              | 11689.9     | 7317.4        | 3.833      |
| 2     | UNKNOWN | 30.800     | 96.17             | 208287.6    | 183580.6      | 96.167     |
| Total |         |            | 100.00            | 219977.5    | 190898.0      | 100.000    |

Fig S77. HPLC Profile of Enantioenriched 4a

```

NAME      INN-4-KSB-80B-1H
EXPNO     5
PROCNO    1
Date_     20130613
Time      20.01
INSTRUM   spect
PROBHD    5 mm DABBO BB-
PULPROG   zg30
TD         65536
SOLVENT   CDCl3
NS         6
DS         0
SWH        8223.685 Hz
FIDRES     0.125483 Hz
AQ         3.9846387 sec
RG         32
DW         60.800 usec
DE         6.50 usec
TE         294.6 K
D1         1.00000000 sec
TD0        1

```

```

===== CHANNEL f1 =====
NUC1      1H
P1        13.50 usec
PL1       -1.00 dB
PL1W      10.56200695 W
SFO1      400.1324710 MHz
SI         32768
SF         400.1300095 MHz
WDW        EM
SSB        0
LB         0.30 Hz
GB         0
PC         1.00

```

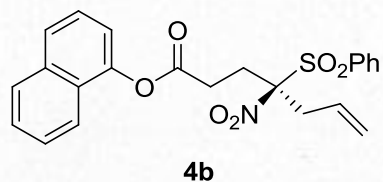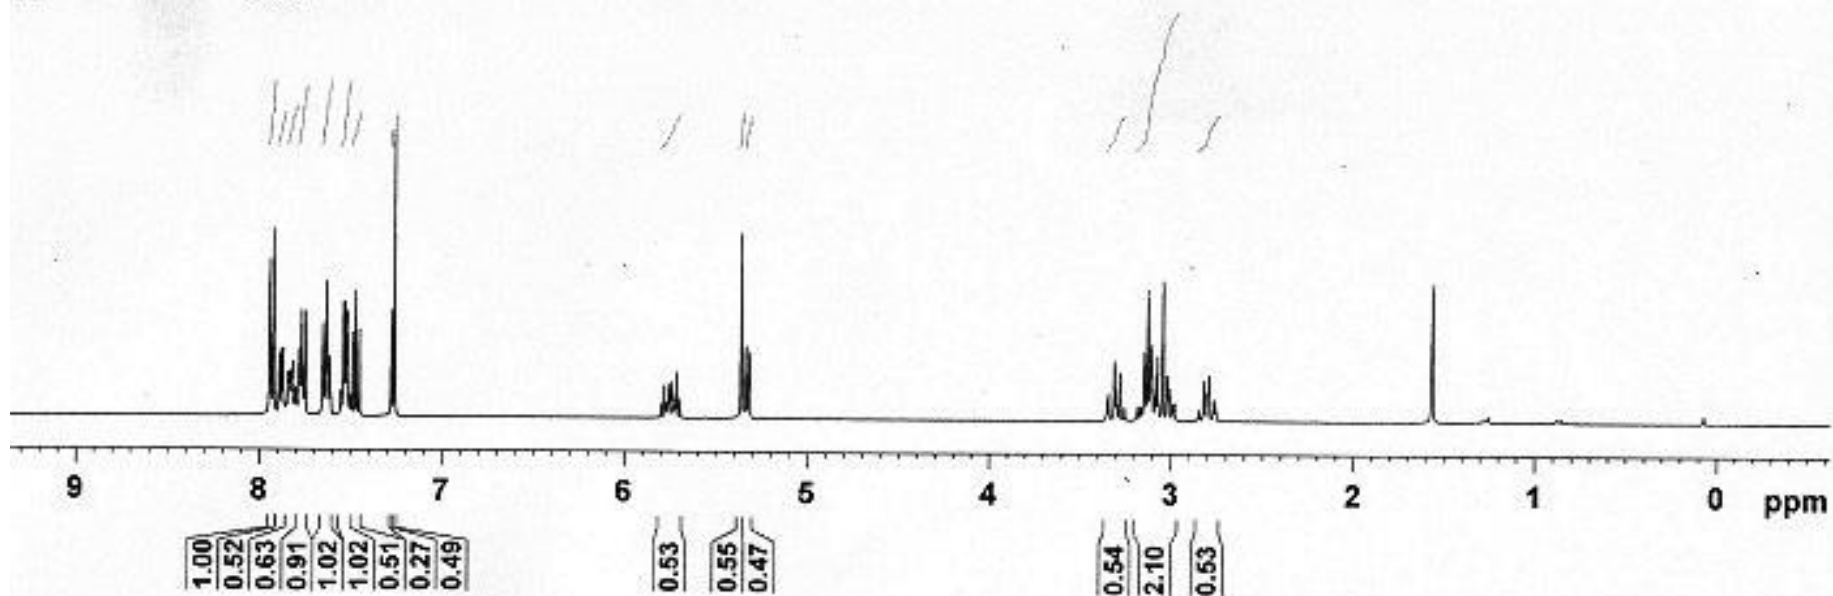

Fig 78. <sup>1</sup>H NMR Spectrum of 4b

```

NAME      inn-4-ksb-80b-13c
EXPNO     1
PROCNO    1
Date_     20130616
Time      18.31
INSTRUM   spect
PROBHD    5 mm PABBO BB-
PULPROG   zgpg30
TD         65536
SOLVENT   CDC13
NS         200
DS         4
SWH        24038.461 Hz
FIDRES     0.366798 Hz
AQ         1.3631988 sec
RG         2050
DW         20.800 usec
DE         6.50 usec
TE         294.3 K
D1         1.00000000 sec
D11        0.03000000 sec
TD0        1

```

```

----- CHANNEL f1 -----
NUC1       13C
P1         8.75 usec
PL1        -2.00 dB
PL1W       56.53121948 W
SFO1       100.6226298 MHz

```

```

----- CHANNEL f2 -----
CPDPRG2    waltz16
NUC2        1H
PCPD2       80.00 usec
PL2         -1.00 dB
PL12        14.50 dB
PL13        14.50 dB
PL2W        10.56200695 W
PL12W       0.29767781 W
PL13W       0.29767781 W
SFO2        400.1316005 MHz
SI          32768
SF          100.6127565 MHz
WDM         EM
SSB         0
LB          1.00 Hz
GB          0
PC          1.40

```

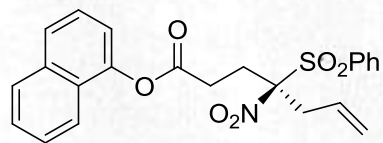

4b

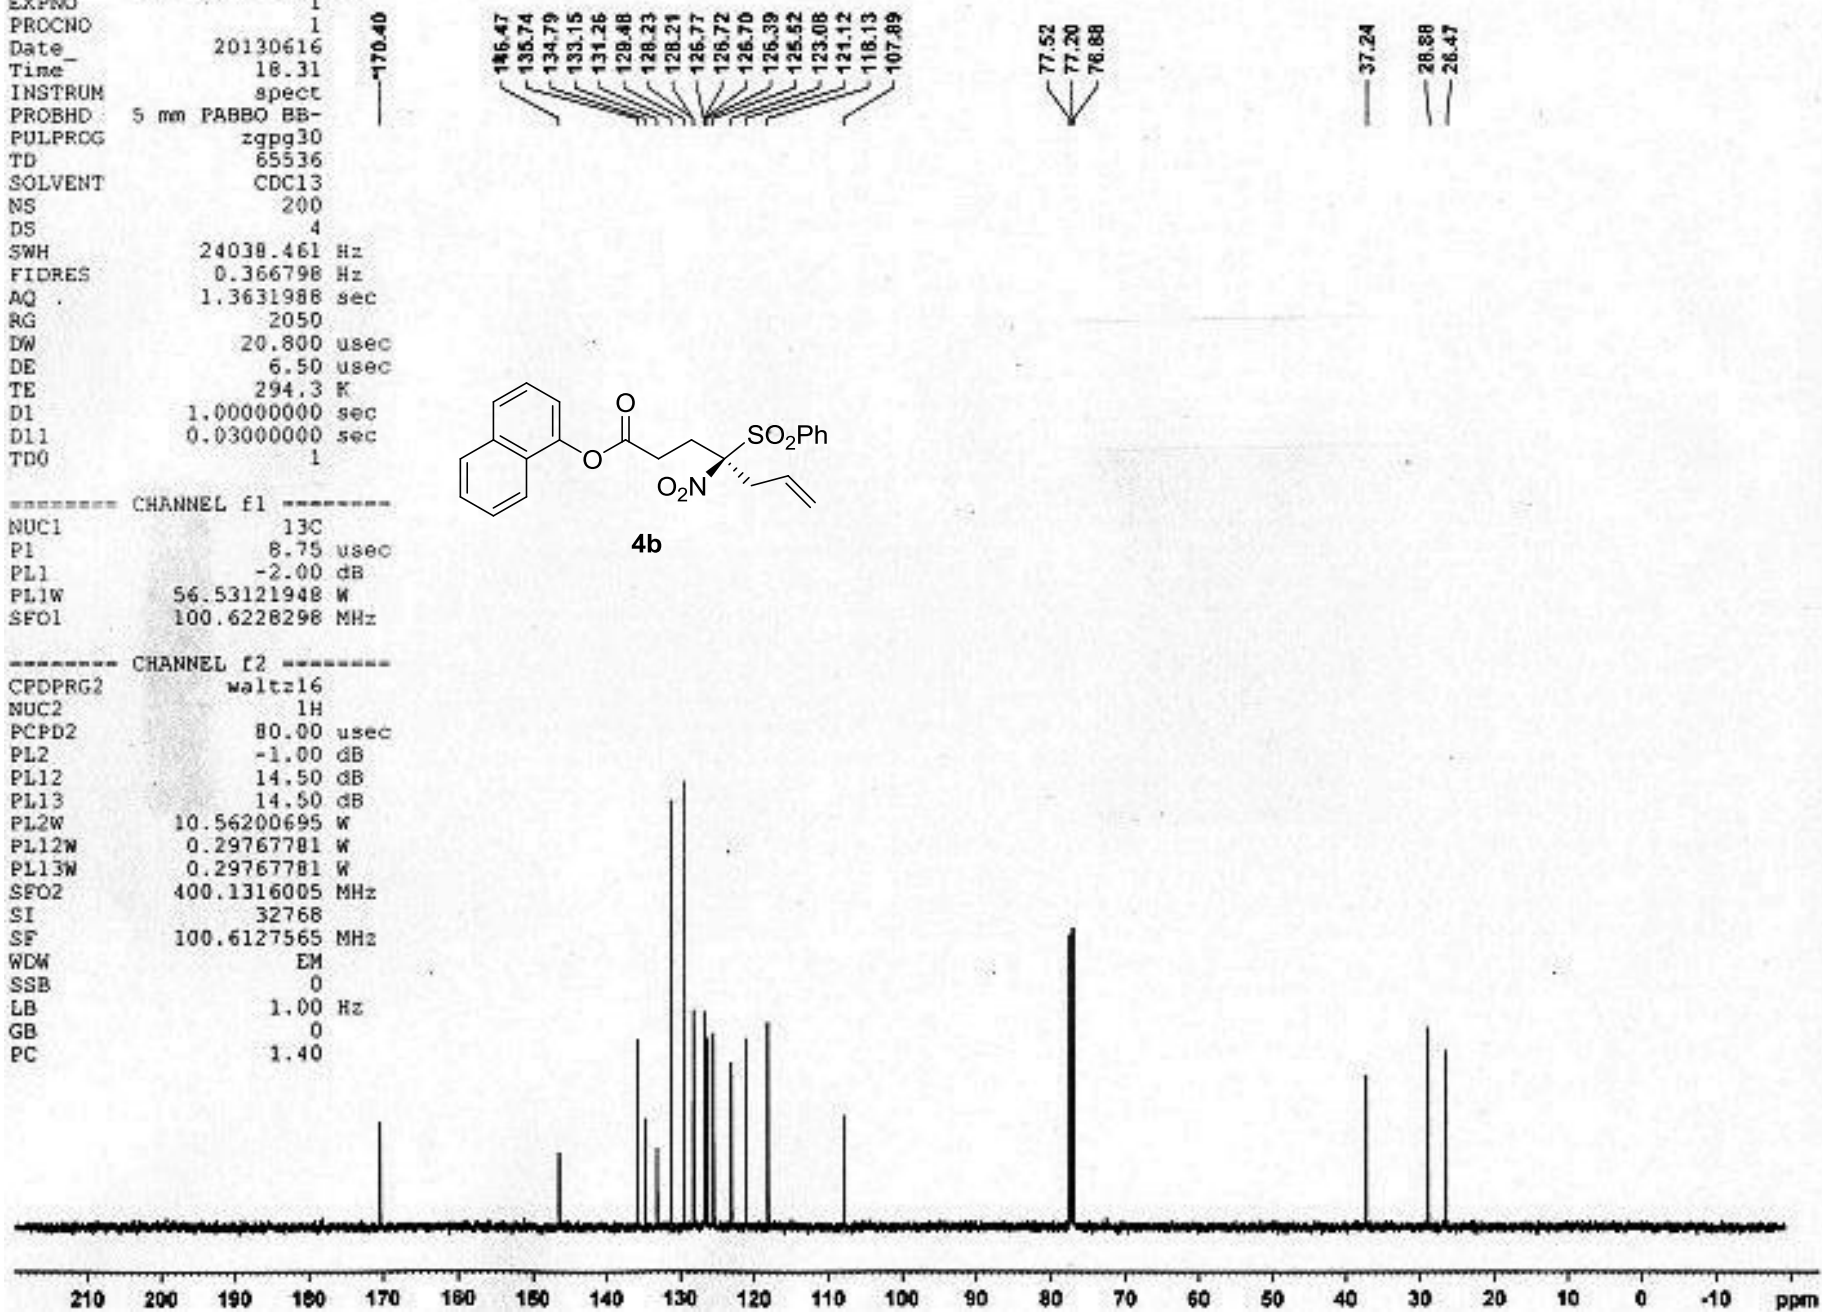

Fig S79. <sup>13</sup>C NMR Spectrum of 4b

# Chromatogram : KSB-4-CE1-2R-B-80\_channel4

System : Jasco HPLC  
Method : ksb-20%-1f-250nm  
User : User1

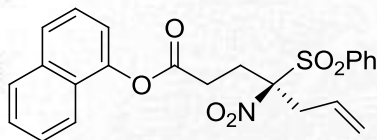

4b

Acquired : 6/12/2013 10:52:56 PM  
Processed : 6/12/2013 11:21:53 PM  
Printed : 6/12/2013 11:22:04 PM

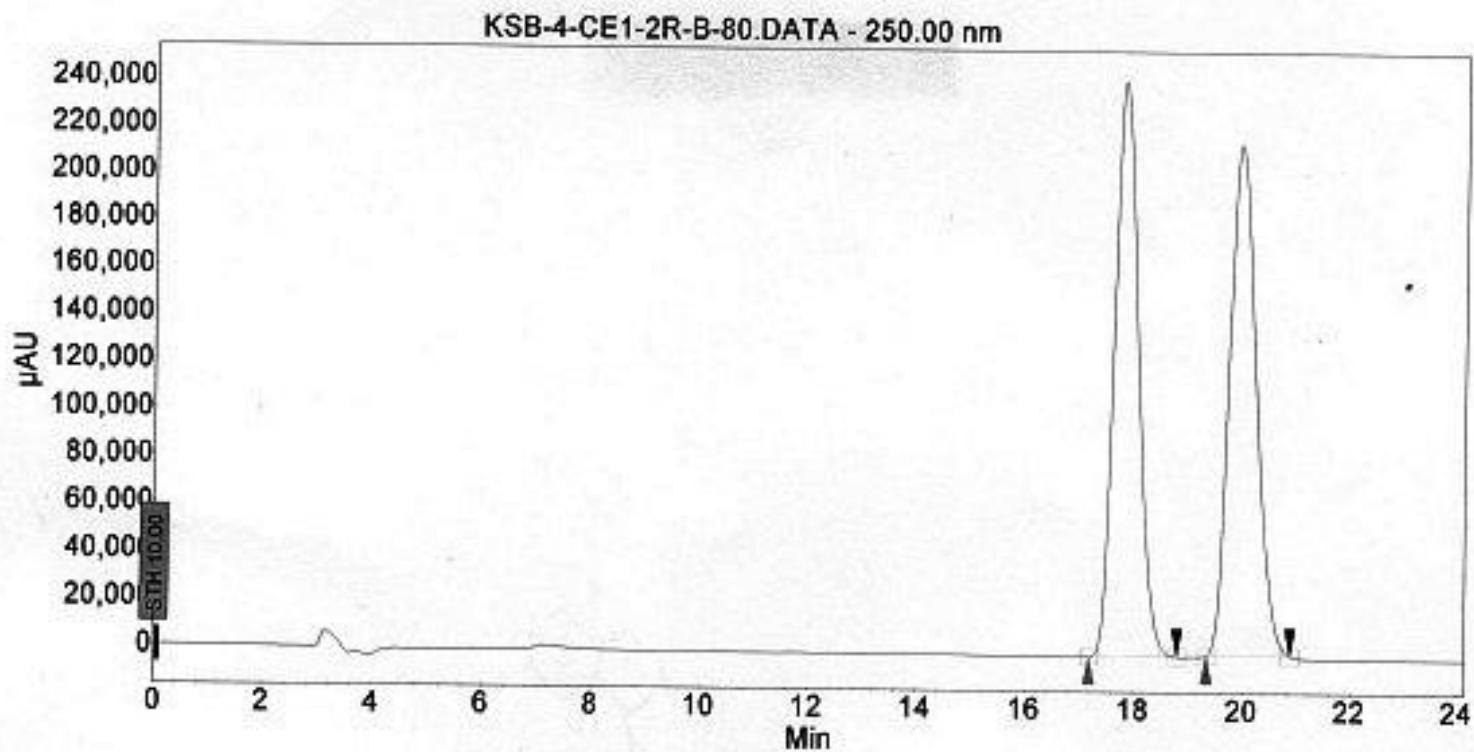

## Peak results :

| Index | Name    | Time [Min] | Quantity [% Area] | Height [μAU] | Area [μAU.Min] | Area % [%] |
|-------|---------|------------|-------------------|--------------|----------------|------------|
| 1     | UNKNOWN | 17.785     | 49.97             | 242702.2     | 122582.1       | 49.969     |
| 2     | UNKNOWN | 19.932     | 50.03             | 215389.5     | 122733.6       | 50.031     |
| Total |         |            | 100.00            | 458091.6     | 245315.7       | 100.000    |

Fig S80. HPLC Profile of Racemic 4b

# Chromatogram : KSB-4-CE1-1R-B-83\_channel4

System : Jasco HPLC  
Method : ksb-20%-1f-250nm  
User : User1

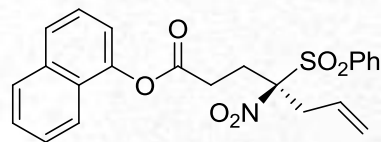

4b

Acquired : 6/12/2013 9:50:11 PM  
Processed : 6/12/2013 10:16:53 PM  
Printed : 6/12/2013 11:12:24 PM

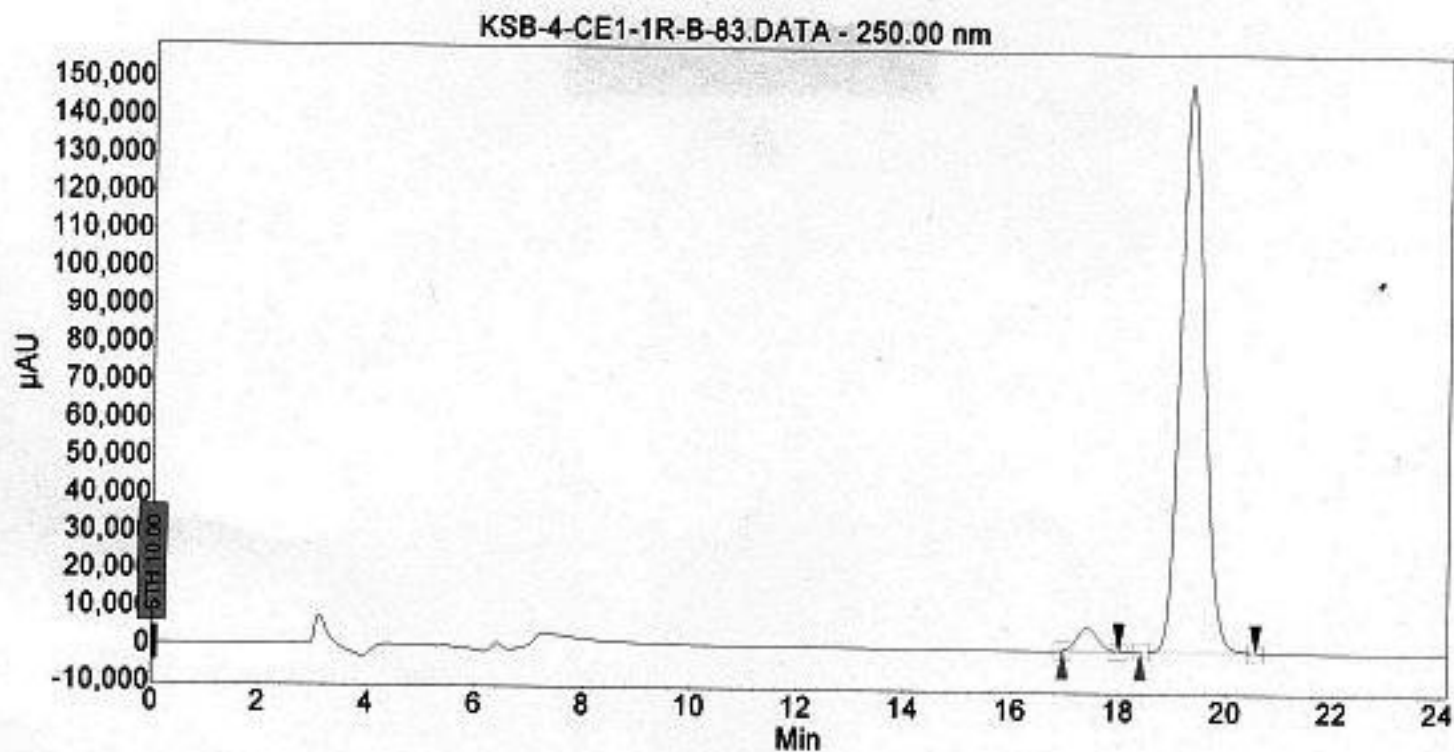

## Peak results :

| Index | Name    | Time [Min] | Quantity [% Area] | Height [μAU] | Area [μAU.Min] | Area % [%] |
|-------|---------|------------|-------------------|--------------|----------------|------------|
| 2     | UNKNOWN | 17.399     | 3.40              | 6222.6       | 2722.8         | 3.397      |
| 1     | UNKNOWN | 19.279     | 96.60             | 150631.7     | 77435.2        | 96.603     |
| Total |         |            | 100.00            | 156854.2     | 80158.0        | 100.000    |

Fig S81. HPLC Profile of Enantioenriched 4b

```

NAME inn-4-ksb-79b-1h
EXPNO 35
PROCNO 1
Date_ 20130612
Time_ 14.59
INSTRUM spect
PROBHD 5 mm PABBO BB-
PULPROG zg30
TD 57690
SOLVENT CDCl3
NS 12
DS 0
SWH 9615.385 Hz
FIDRES 0.166673 Hz
AQ 2.9999299 sec
RG 128
DW 52.000 usec
DE 6.50 usec
TE 295.2 K
D1 1.00000000 sec
TD0 1

```

```

===== CHANNEL f1 =====
NUC1 1H
P1 13.50 usec
PL1 -1.00 dB
PL1W 10.56200695 W
SFO1 400.1320007 MHz
SI 32768
SF 400.1300095 MHz
WDW EM
SSB 0
LB 0.00 Hz
GB 0
PC 1.00

```

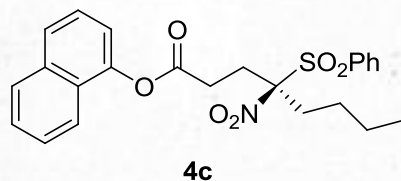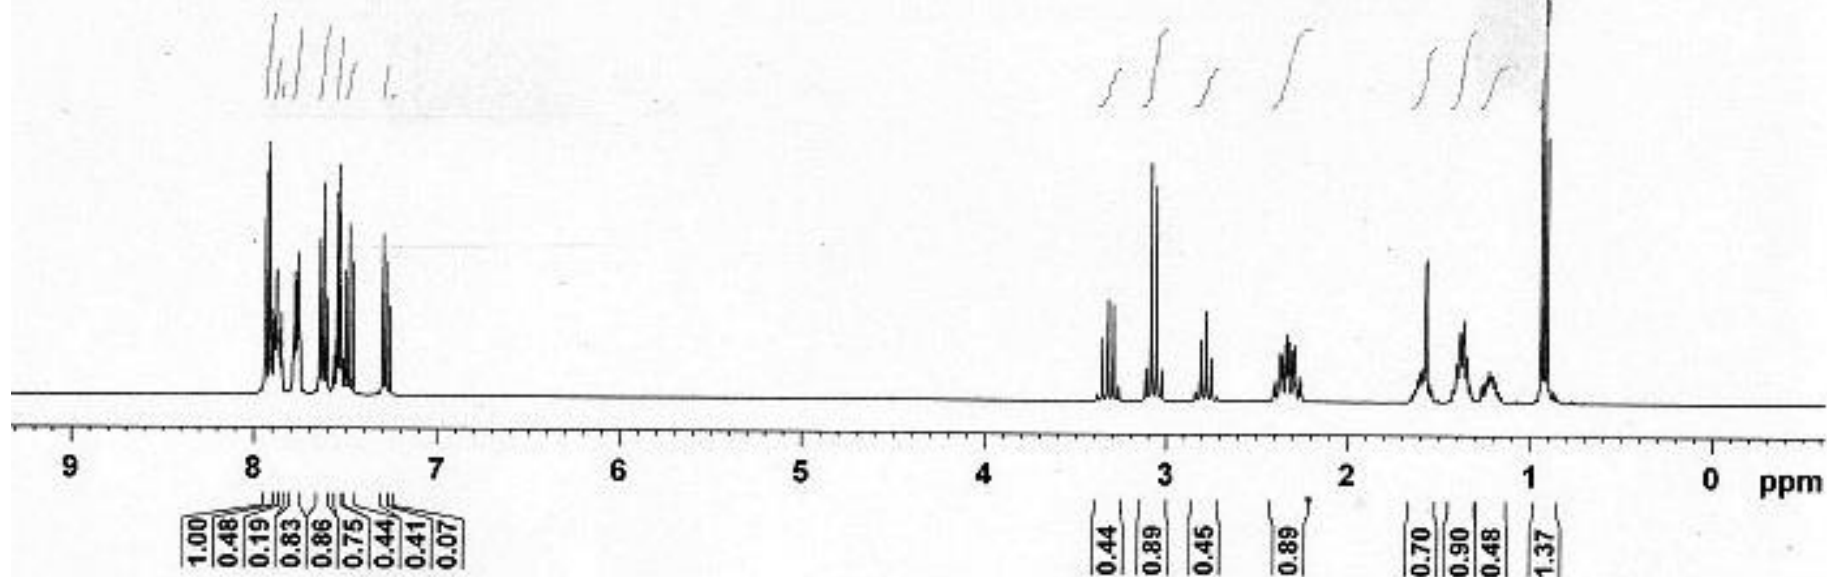

Fig S82. <sup>1</sup>H NMR Spectrum of 4c

```

NAME      inn-4-ksb-79b-13c
EXPNO     36
PROCNO    1
Date_     20130612
Time      15.02
INSTRUM   spect
PROBHD    5 mm PABBO BB-
PULPROG   zgpg30
TD        65536
SOLVENT   CDCl3
NS        70
DS        2
SWH       27777.777 Hz
FIDRES    0.423855 Hz
AQ        1.1796980 sec
RG        912
DN        18.000 usec
DE        6.50 usec
TE        295.7 K
D1        1.00000000 sec
D11       0.03000000 sec
TDO       1

```

```

===== CHANNEL f1 =====
NUC1      13C
P1        8.75 usec
PL1       -2.00 dB
PL1W      56.53121948 W
SFO1      100.6242389 MHz

```

```

===== CHANNEL f2 =====
CPDPRG2   waltz16
NUC2      1H
PCPD2     80.00 usec
PL2       -1.00 dB
PL12      14.50 dB
PL13      14.50 dB
PL2W      10.56200695 W
PL12W     0.29767781 W
PL13W     0.29767781 W
SFO2      400.1316005 MHz
SI        32768
SF        100.6127543 MHz
WDW       EM
SSB       0
LB        1.00 Hz
GB        0
PC        1.40

```

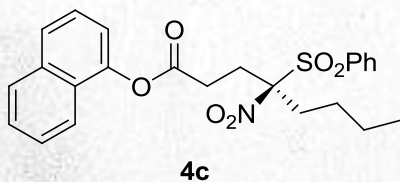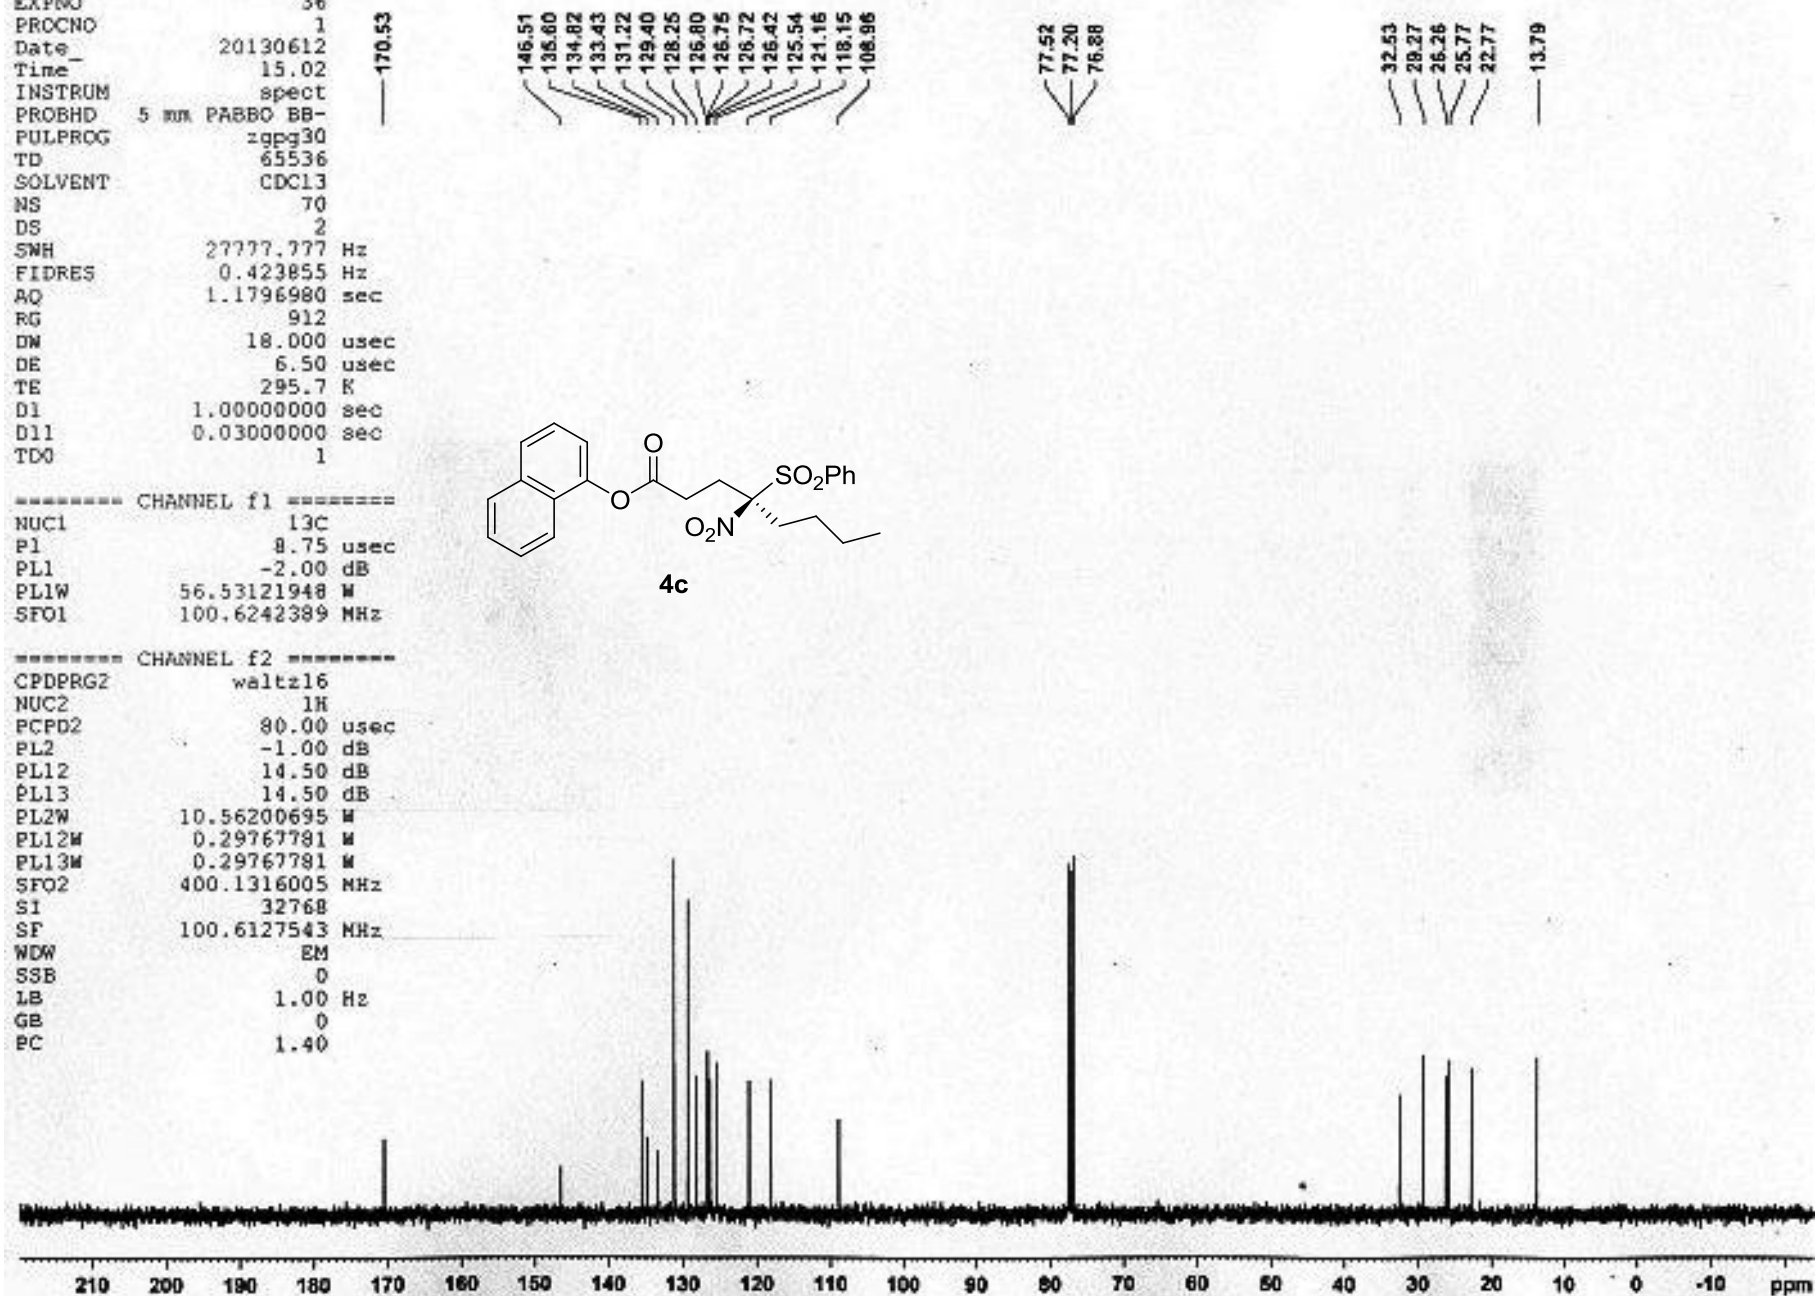

Fig S83. <sup>13</sup>C NMR Spectrum of 4c

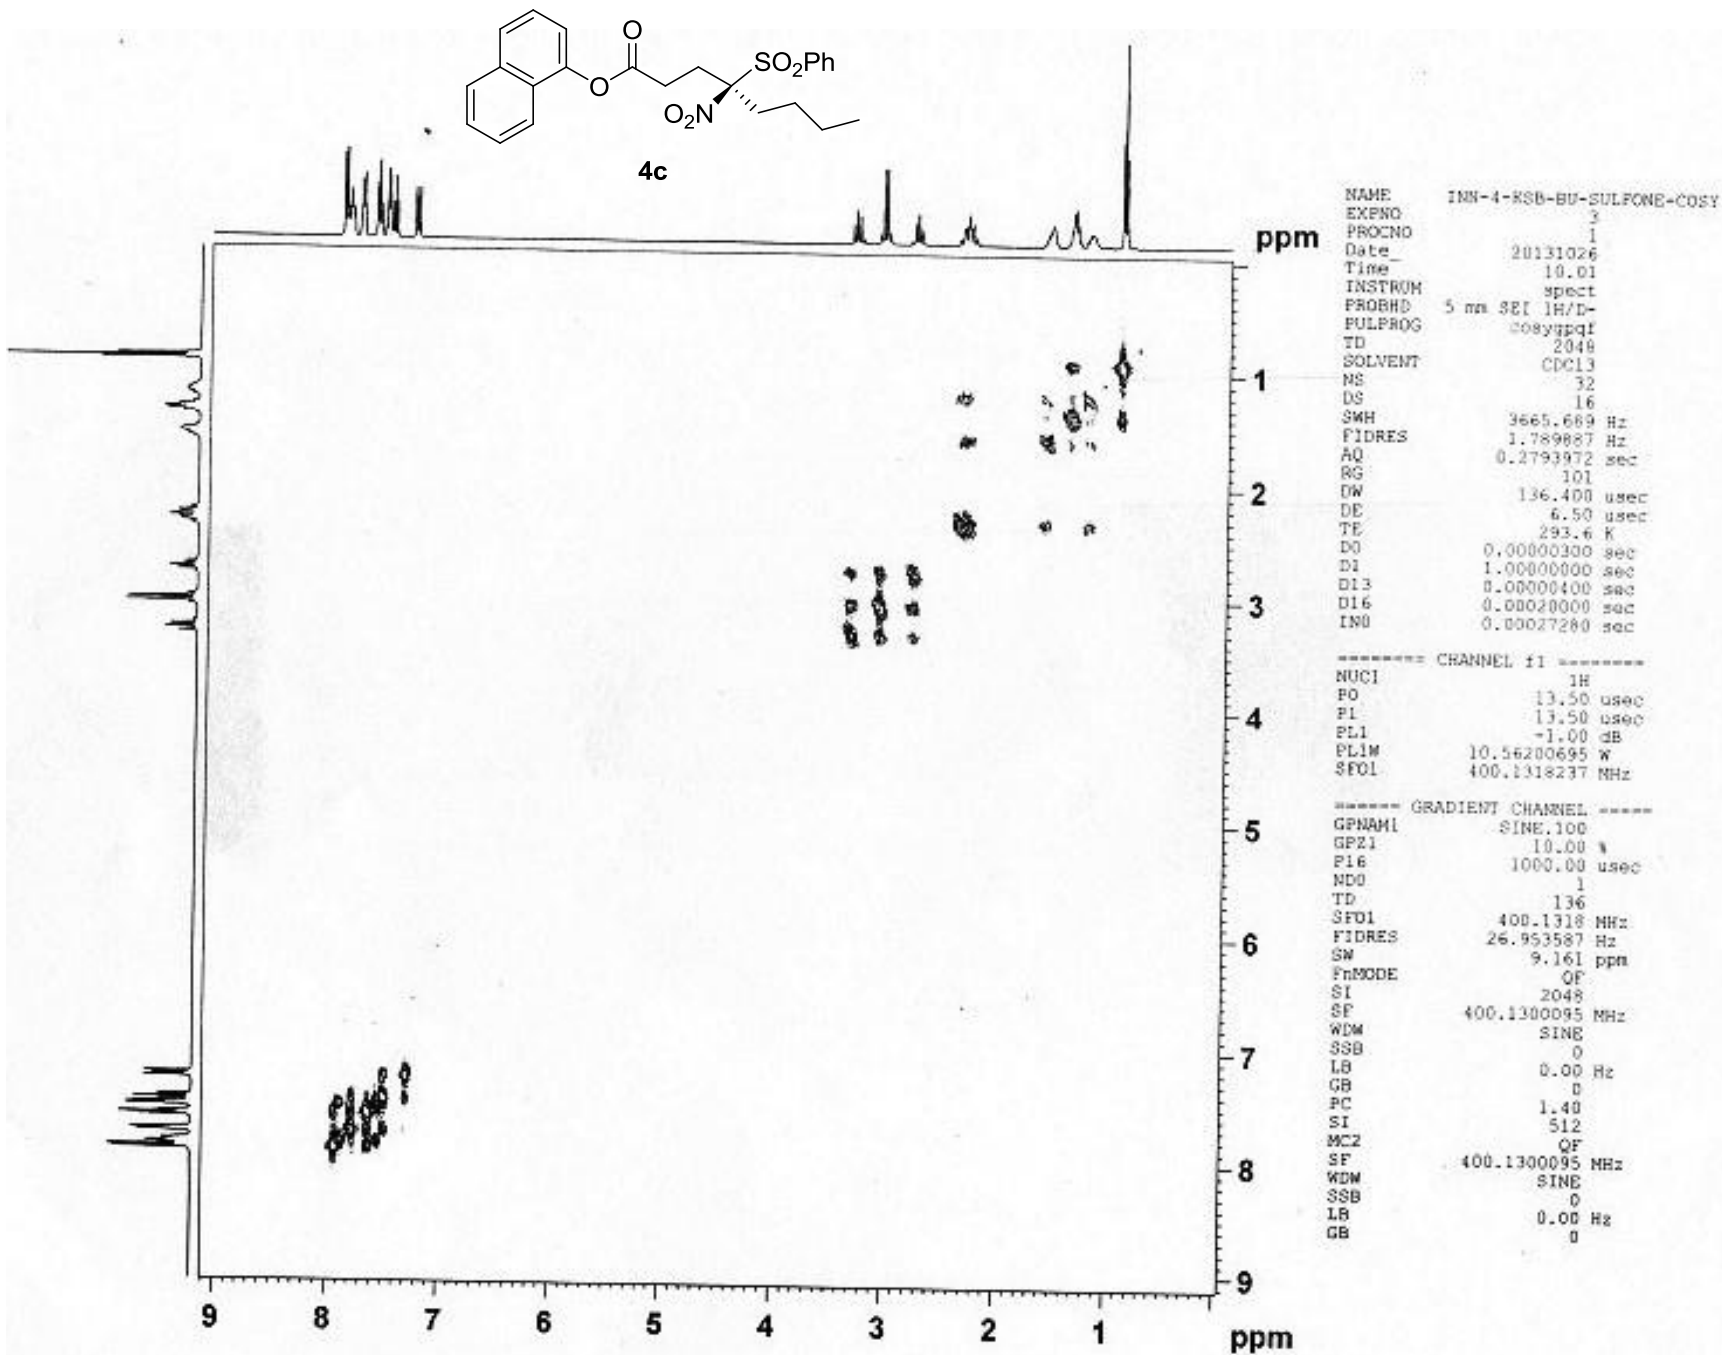

Fig S84.  $^1\text{H}$ - $^1\text{H}$  COSY NMR Spectrum of 4c



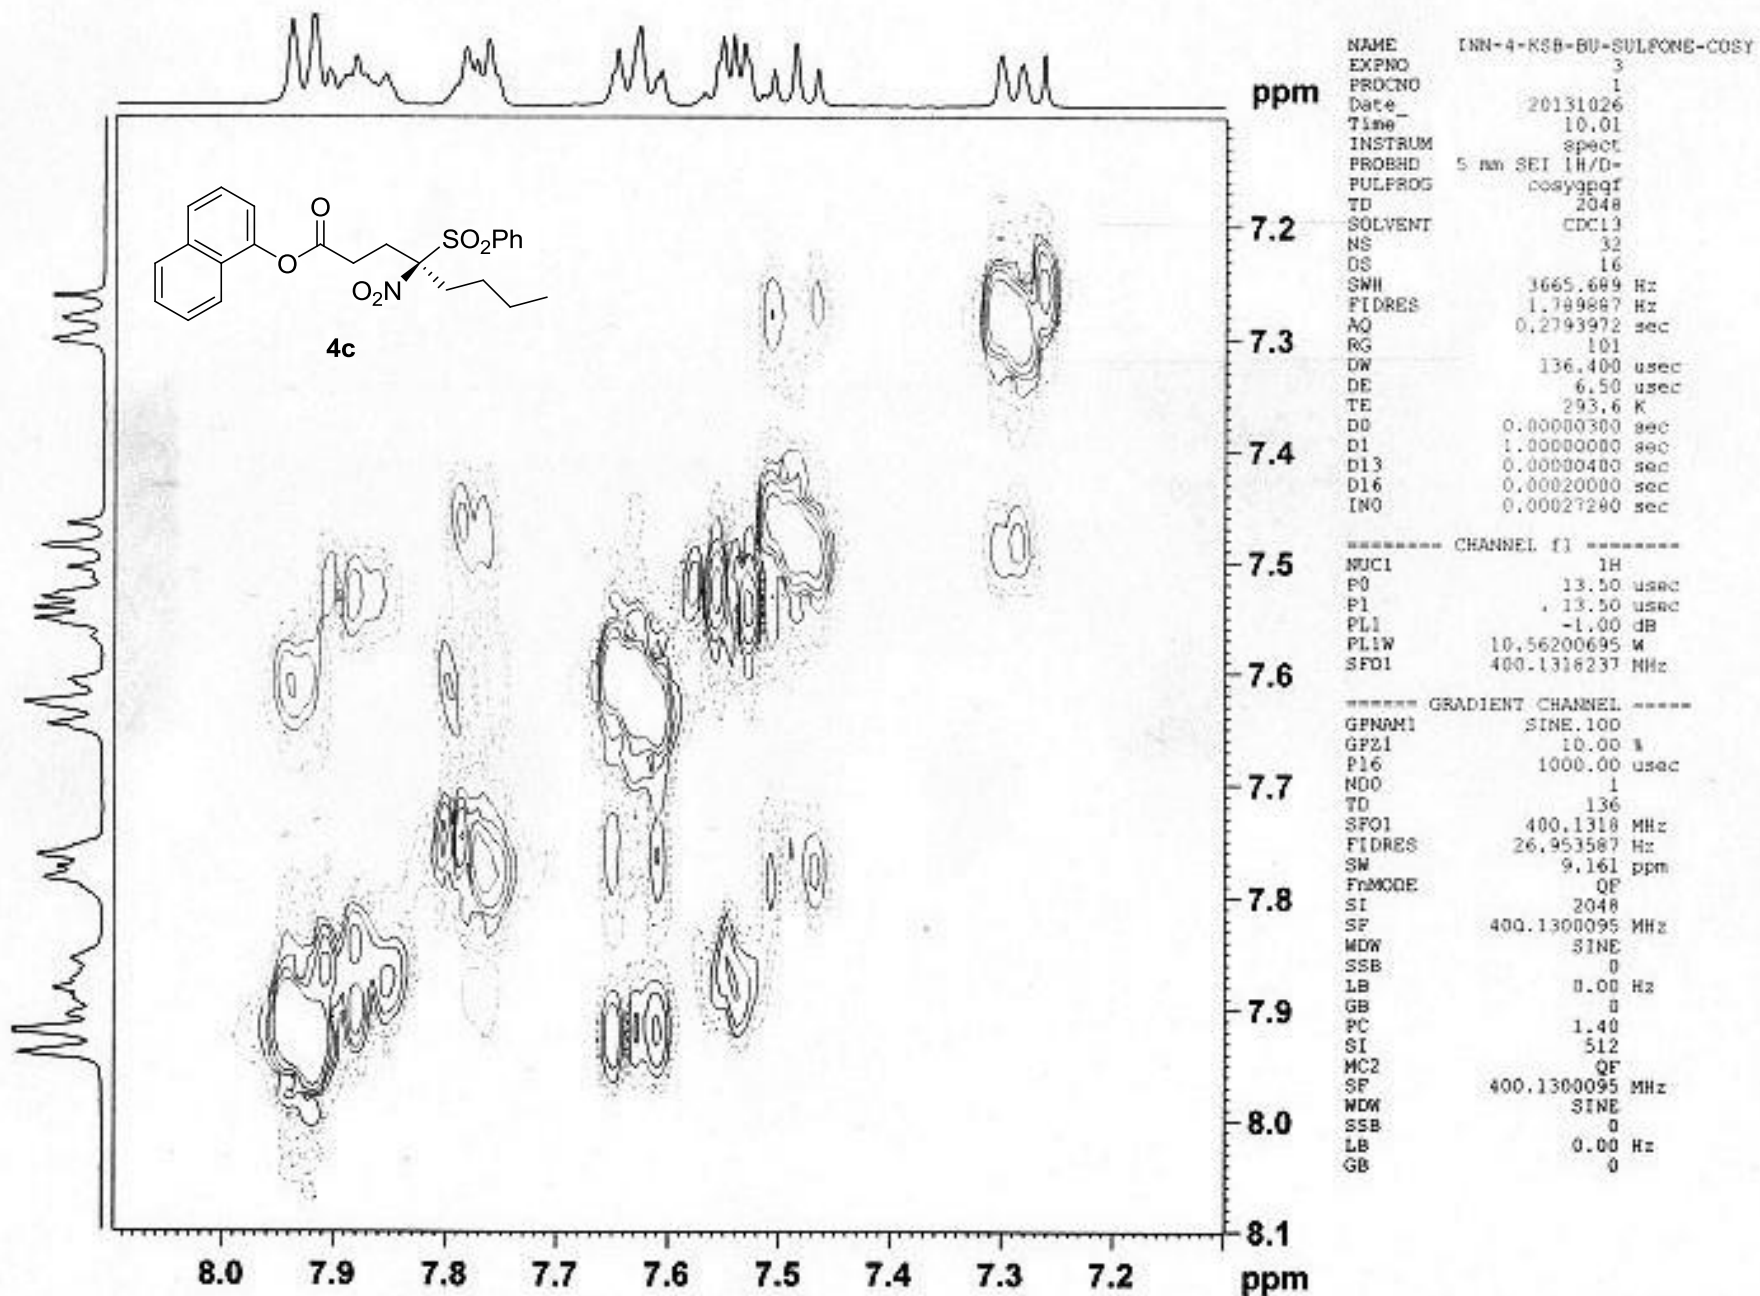

Fig S85. Expanded  $^1\text{H}$ - $^1\text{H}$  COSY NMR Spectrum of 4c

# Chromatogram : ksb-4-CE1-2r-B-79\_channel4

System : Jasco HPLC  
Method : ksb-20%-1f-250nm  
User : User1

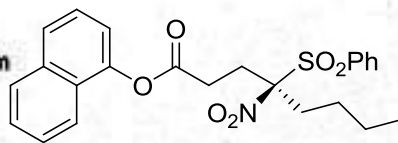

4c

Acquired : 6/13/2013 1:31:47 AM  
Processed : 6/13/2013 1:57:40 AM  
Printed : 6/13/2013 1:59:53 AM

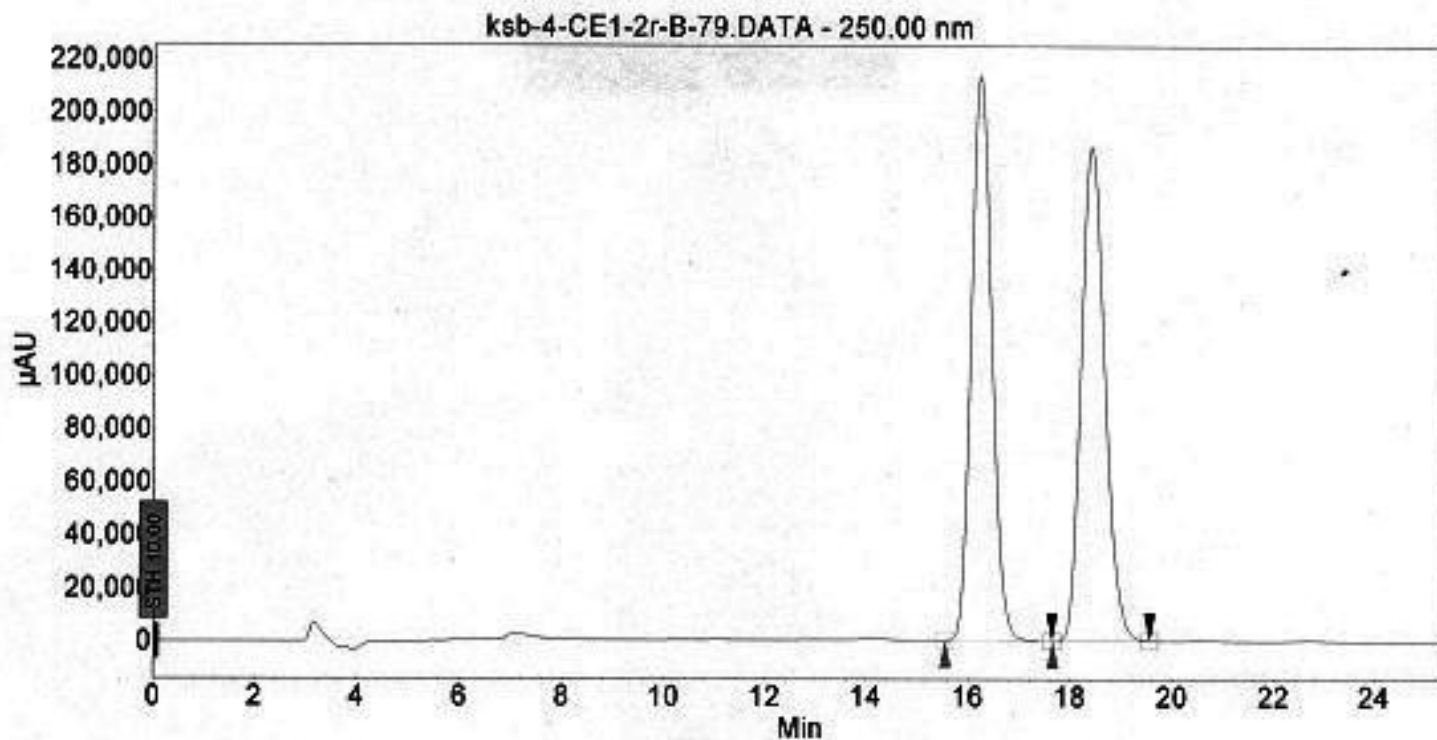

## Peak results :

| Index | Name    | Time [Min] | Quantity [% Area] | Height [μAU] | Area [μAU.Min] | Area % [%] |
|-------|---------|------------|-------------------|--------------|----------------|------------|
| 1     | UNKNOWN | 16.212     | 49.72             | 214001.3     | 99223.7        | 49.719     |
| 2     | UNKNOWN | 18.385     | 50.28             | 187171.4     | 100344.7       | 50.281     |
| Total |         |            | 100.00            | 401172.7     | 199568.4       | 100.000    |

Fig S86. HPLC Profile of Racemic 4c

# Chromatogram : ksb-4-CE1-1r-A-84\_channel4

System : Jasco HPLC  
Method : ksb-20%-1f-250nm  
User : User1

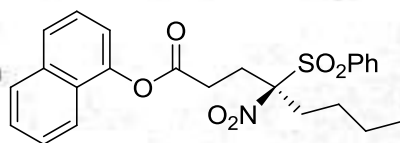

4c

Acquired : 6/13/2013 12:57:13 AM  
Processed : 6/13/2013 1:26:41 AM  
Printed : 6/13/2013 1:28:38 AM

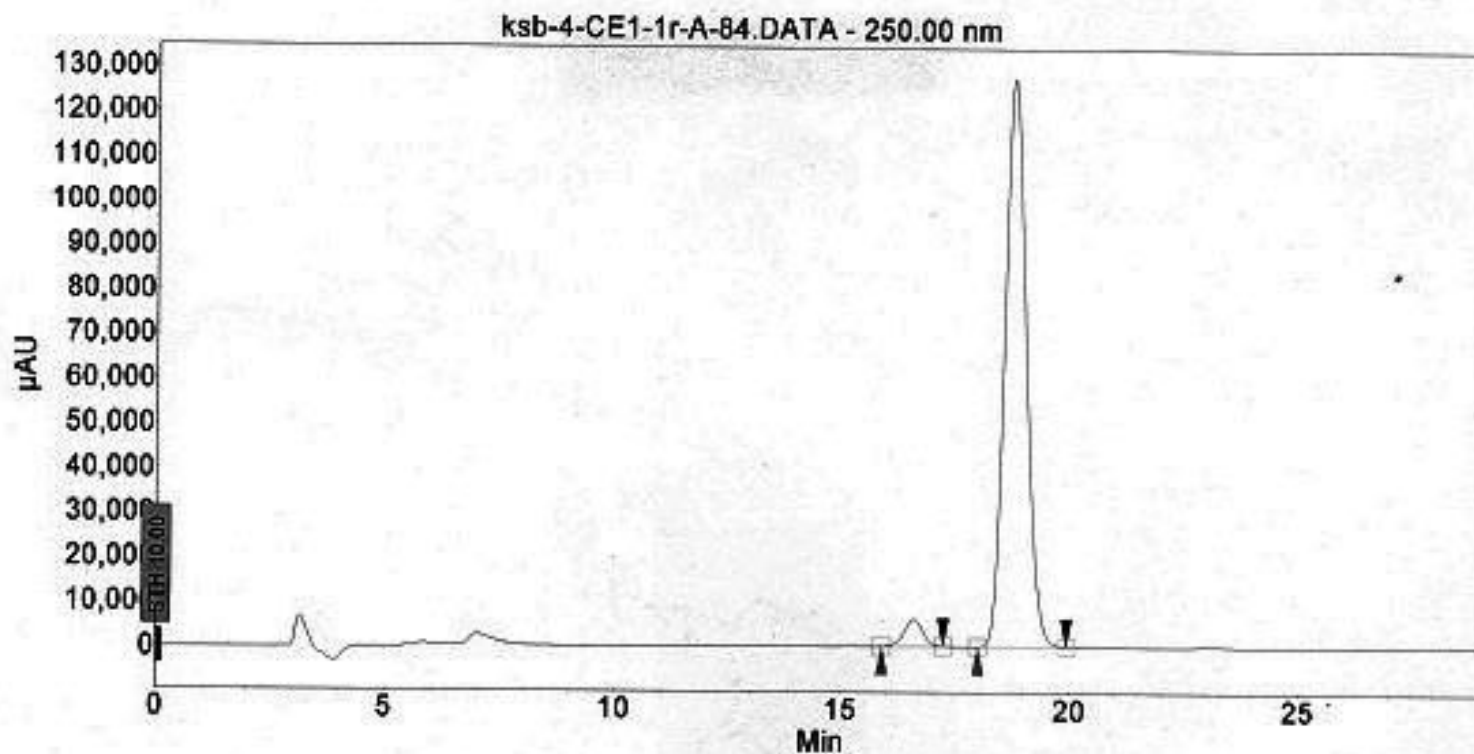

## Peak results :

| Index | Name    | Time [Min] | Quantity [% Area] | Height [μAU] | Area [μAU Min] | Area % [%] |
|-------|---------|------------|-------------------|--------------|----------------|------------|
| 1     | UNKNOWN | 16.585     | 4.02              | 6052.8       | 2856.5         | 4.016      |
| 2     | UNKNOWN | 18.732     | 95.98             | 127532.0     | 68277.0        | 95.984     |
| Total |         |            | 100.00            | 133584.8     | 71133.5        | 100.000    |

Fig S87. HPLC Profile of Enantioenriched 4c

```

NAME      INN-4-KSB-84B-1H
EXPNO     10
PROCNO    1
Date      20130615
Time      8.42
INSTRUM   spect
PROBHD    5 mm PABBO BB-
PULPROG   zg30
TD        65536
SOLVENT   CDCl3
NS        7
DS        0
SWH       8223.685 Hz
FIDRES    0.125483 Hz
AQ        3.9846387 sec
RG        57
DN        60.800 usec
DE        6.50 usec
TE        292.2 K
D1        1.00000000 sec
TD0       1

```

```

----- CHANNEL f1 -----
NUC1      1H
P1        13.50 usec
PL1       -1.00 dB
PL1W      10.56200695 W
SFO1      400.1324710 MH:
SI        32768
SF        400.1300095 MH:
WDW       EM
SSB       0
LB        0.30 Hz
GB        0
PC        1.00

```

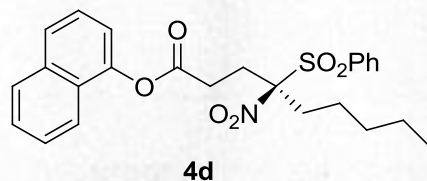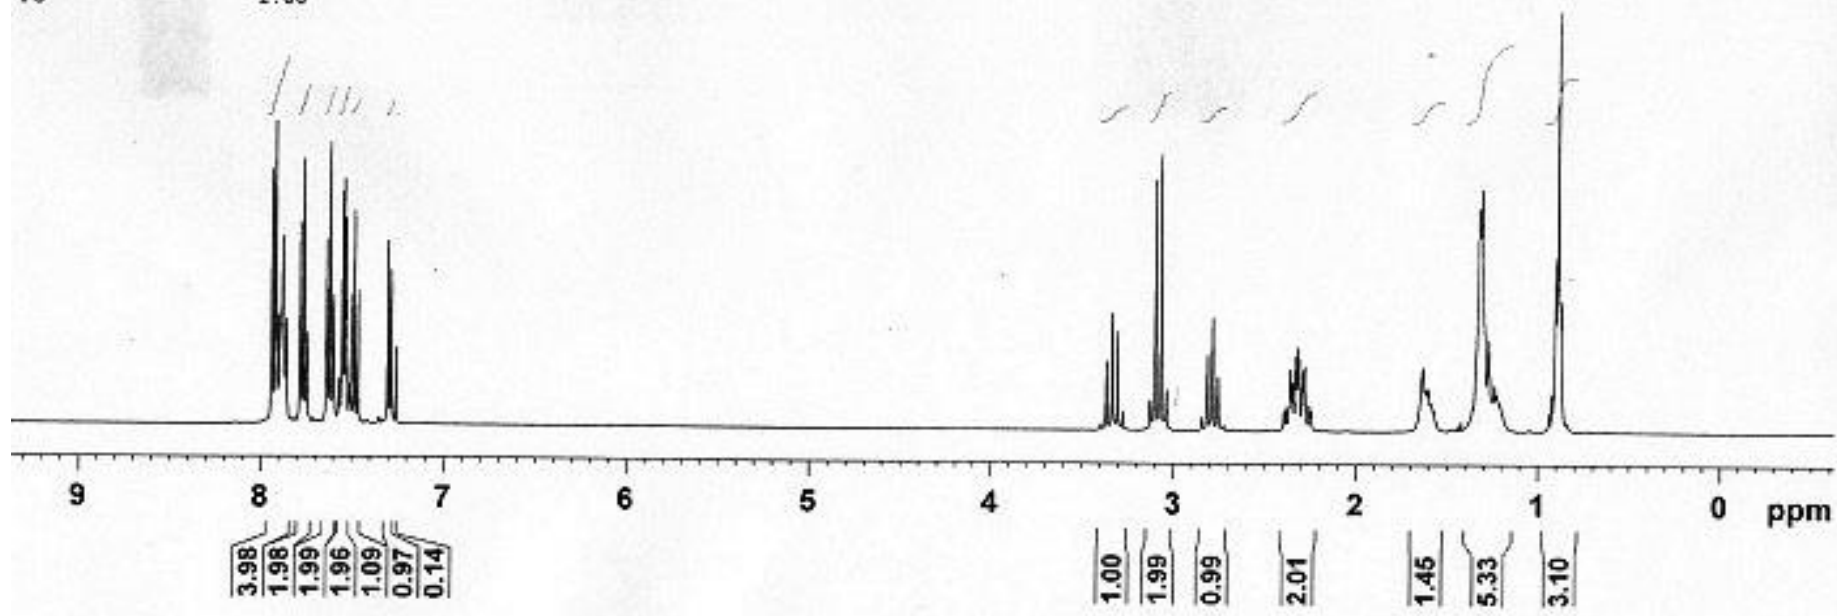

Fig S88. <sup>1</sup>H NMR Spectrum of 4d

```

NAME-      INN-4-KSB-84B-13C
EXPNO      10
PROCNO     1
Date_      20130615
Time       8.44
INSTRUM    spect
PROBHD     5 mm PABBO BB-
PULPROG    zgpg30
TD         65536
SOLVENT    CDCl3
NS         42
DS         4
SWH        24038.461 Hz
FIDRES     0.366798 Hz
AQ         1.3631988 sec
RG         2050
DW         20.800 usec
DE         6.50 usec
TE         292.8 K
d1         1.00000000 sec
d11        0.03000000 sec
TDO        1

```

```

----- CHANNEL f1 -----
NUC1       13C
P1         8.75 usec
PL1        -2.00 dB
PL1W       56.53121948 W
SFO1       100.6228298 MHz

```

```

===== CHANNEL f2 =====
CPDPRG2    waltz16
NUC2       1H
PCPD2      90.00 usec
PL2        -1.00 dB
PL12       14.50 dB
PL13       14.50 dB
PL2W       10.56200695 W
PL12W      0.29767781 W
PL13W      0.29767781 W
SFO2       400.1316005 MHz
SI         32768
SF         100.6127595 MHz
WDW        EM
SSB        0
LB         1.00 Hz
GB         0
PC         1.40

```

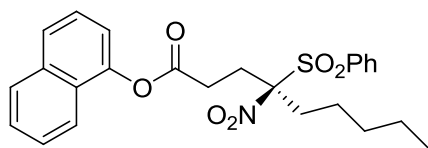

4d

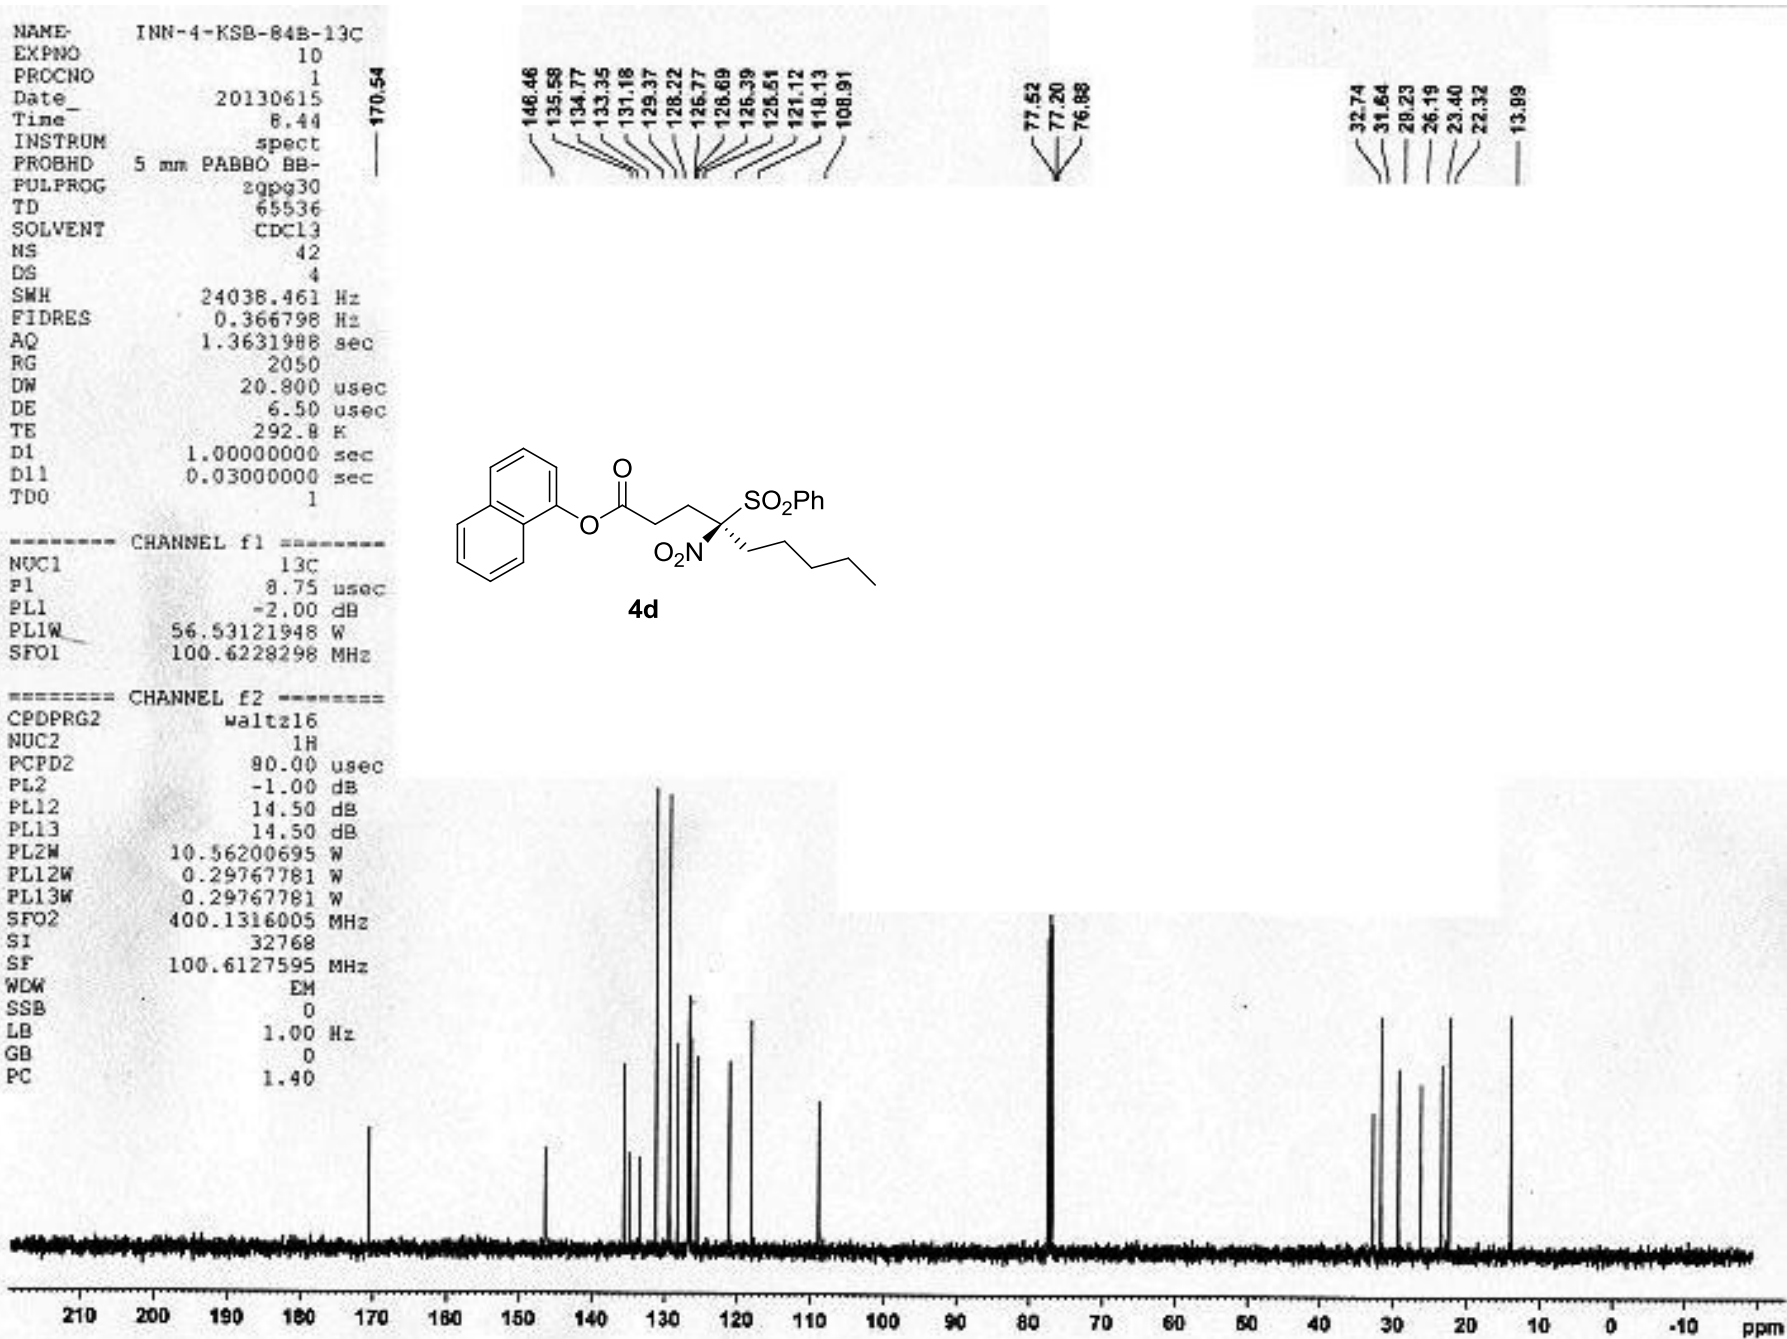

Fig S89. <sup>13</sup>C NMR Spectrum of 4d

# Chromatogram : ksb-4-CE1-3r-C-79\_channel4

System : Jasco HPLC  
Method : ksb-20%-1f-250nm  
User : User1

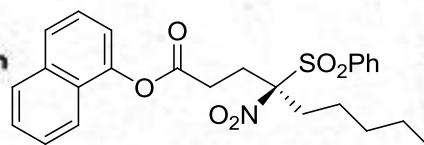

4d

Acquired : 6/13/2013 12:08:49 PM  
Processed : 6/13/2013 12:48:00 PM  
Printed : 6/13/2013 12:49:17 PM

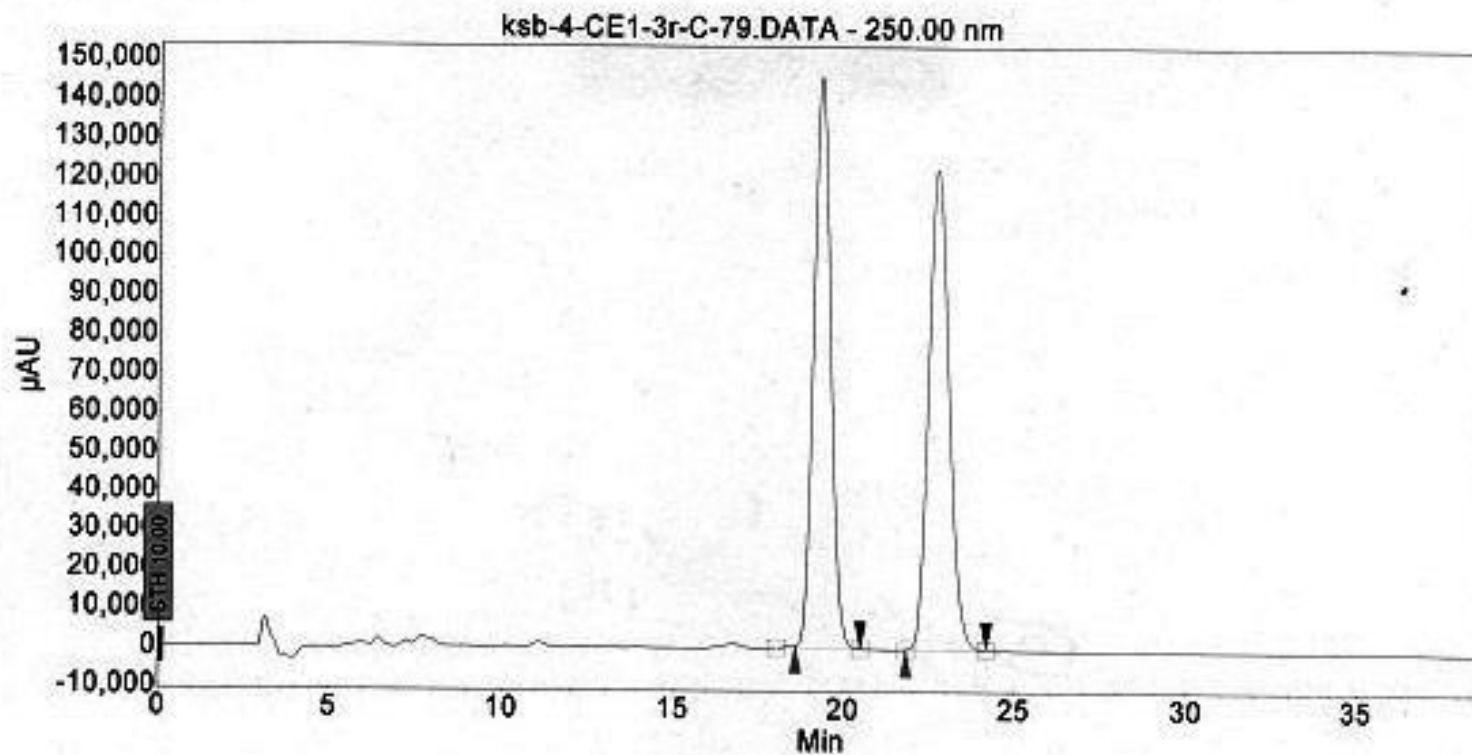

## Peak results :

| Index | Name    | Time [Min] | Quantity [% Area] | Height [μAU] | Area [μAU.Min] | Area % [%] |
|-------|---------|------------|-------------------|--------------|----------------|------------|
| 1     | UNKNOWN | 19.279     | 50.00             | 148037.0     | 84440.8        | 50.000     |
| 2     | UNKNOWN | 22.692     | 50.00             | 122963.1     | 84440.3        | 50.000     |
| Total |         |            | 100.00            | 269000.2     | 168881.1       | 100.000    |

Fig S90. HPLC Profile of Racemic 4d

# Chromatogram : ksb-4-CE1-2r-B-83\_channel4

System : Jasco HPLC  
Method : ksb-20%-1f-250nm  
User : User1

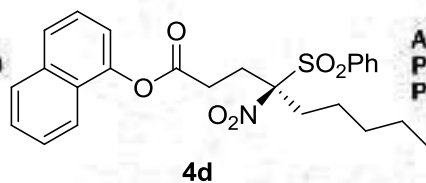

Acquired : 6/13/2013 11:36:20 AM  
Processed : 6/13/2013 12:08:02 PM  
Printed : 6/13/2013 12:49:27 PM

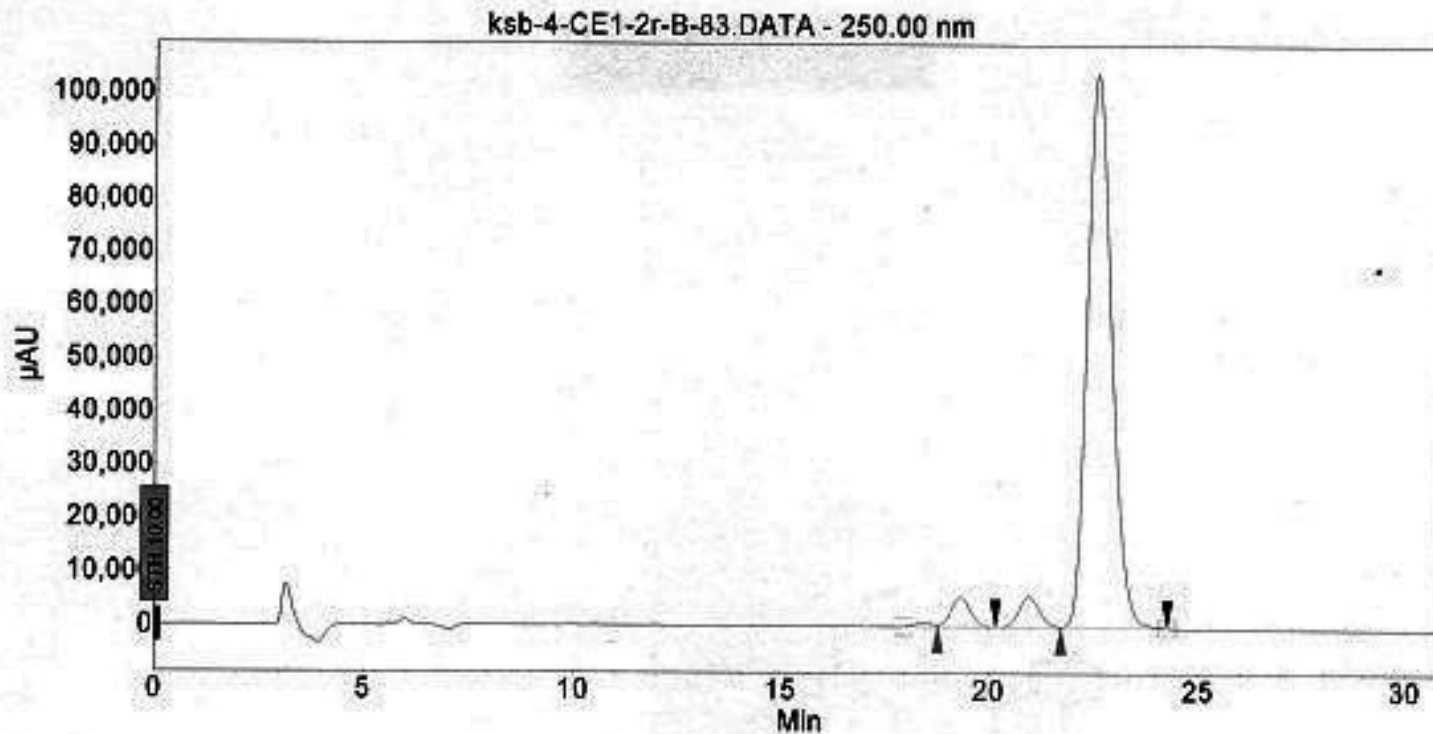

## Peak results :

| Index | Name    | Time [Min] | Quantity [% Area] | Height [μAU] | Area [μAU.Min] | Area % [%] |
|-------|---------|------------|-------------------|--------------|----------------|------------|
| 1     | UNKNOWN | 19.332     | 4.07              | 5499.6       | 2971.1         | 4.069      |
| 2     | UNKNOWN | 22.558     | 95.93             | 104090.3     | 70052.2        | 95.931     |
| Total |         |            | 100.00            | 109590.0     | 73023.3        | 100.000    |

Fig S91. HPLC Profile of Enantioenriched 4d

NAME INN-4-KSB-79A-1h  
 EXPNO 15  
 PROCNO 1  
 Date\_ 20130612  
 Time\_ 11.27  
 INSTRUM spect  
 PROBHD 5 mm PABBO HD-  
 PULPROG zg30  
 TD 49340  
 SOLVENT CDCl3  
 NS 27  
 DS 0  
 SWH 8223.685 Hz  
 FIDRES 0.166674 Hz  
 AQ 2.9999220 sec  
 RG 32  
 DW 60.800 usec  
 DE 6.50 usec  
 TE 295.0 K  
 D1 1.00000000 sec  
 TDO 1

----- CHANNEL f1 -----  
 NUC1 1H  
 P1 13.50 usec  
 PL1 -1.00 dB  
 PL1W 10.56200695 W  
 SFO1 400.1324710 MHz  
 SI 32768  
 SF 400.1300094 MHz  
 MDW EM  
 SSB 0  
 LB 0.30 Hz  
 GB 0  
 PC 1.00

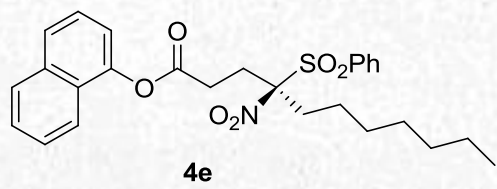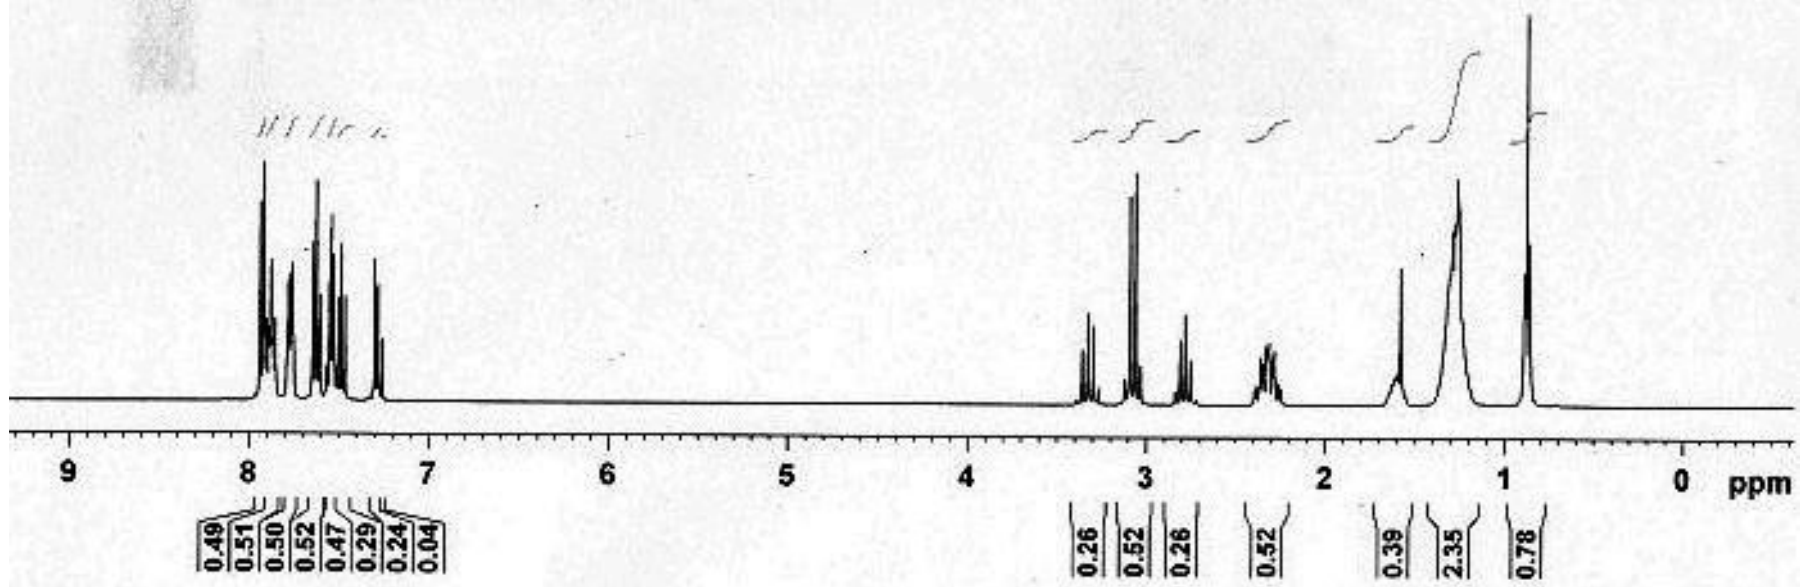

Fig S92. <sup>1</sup>H NMR Spectrum of 4e



```

NAME      INN-4-KSB-79A-13C
EXPNO     4
PROCNO    1
Date_     20130616
Time      17.38
INSTRUM   spect
PROBHD    5 mm PABBO BB-
PULPROG   zgpg30
TD        65536
SOLVENT   CDC13
NS        180
DS        4
SWH       24038.461 Hz
FIDRES    0.366798 Hz
AQ        1.3631988 sec
RG        2050
DW        20.800 usec
DE        6.50 usec
TE        293.4 K
D1        1.00000000 sec
D11       0.03000000 sec
TDO       1

```

```

----- CHANNEL f1 -----
NUC1      13C
P1        8.75 usec
PL1       -2.00 dB
PL1W      56.53121948 W
SFO1      100.6228298 MHz

```

```

===== CHANNEL f2 =====
CPDPRG2   waltz16
NUC2      1H
PCPD2     80.00 usec
PL2       -1.00 dB
PL12      14.50 dB
PL13      14.50 dB
PL2W      10.56200695 W
PL12W     0.29767781 W
PL13W     0.29767781 W
SFO2      400.1316005 MHz
SI        32768
SF        100.6127567 MHz
WDM       EM
SSB       0
LB        1.00 Hz
GB        0
PC        1.40

```

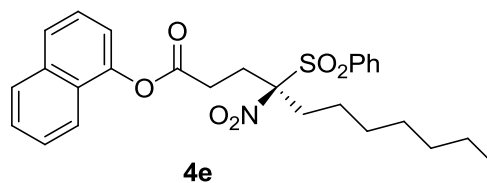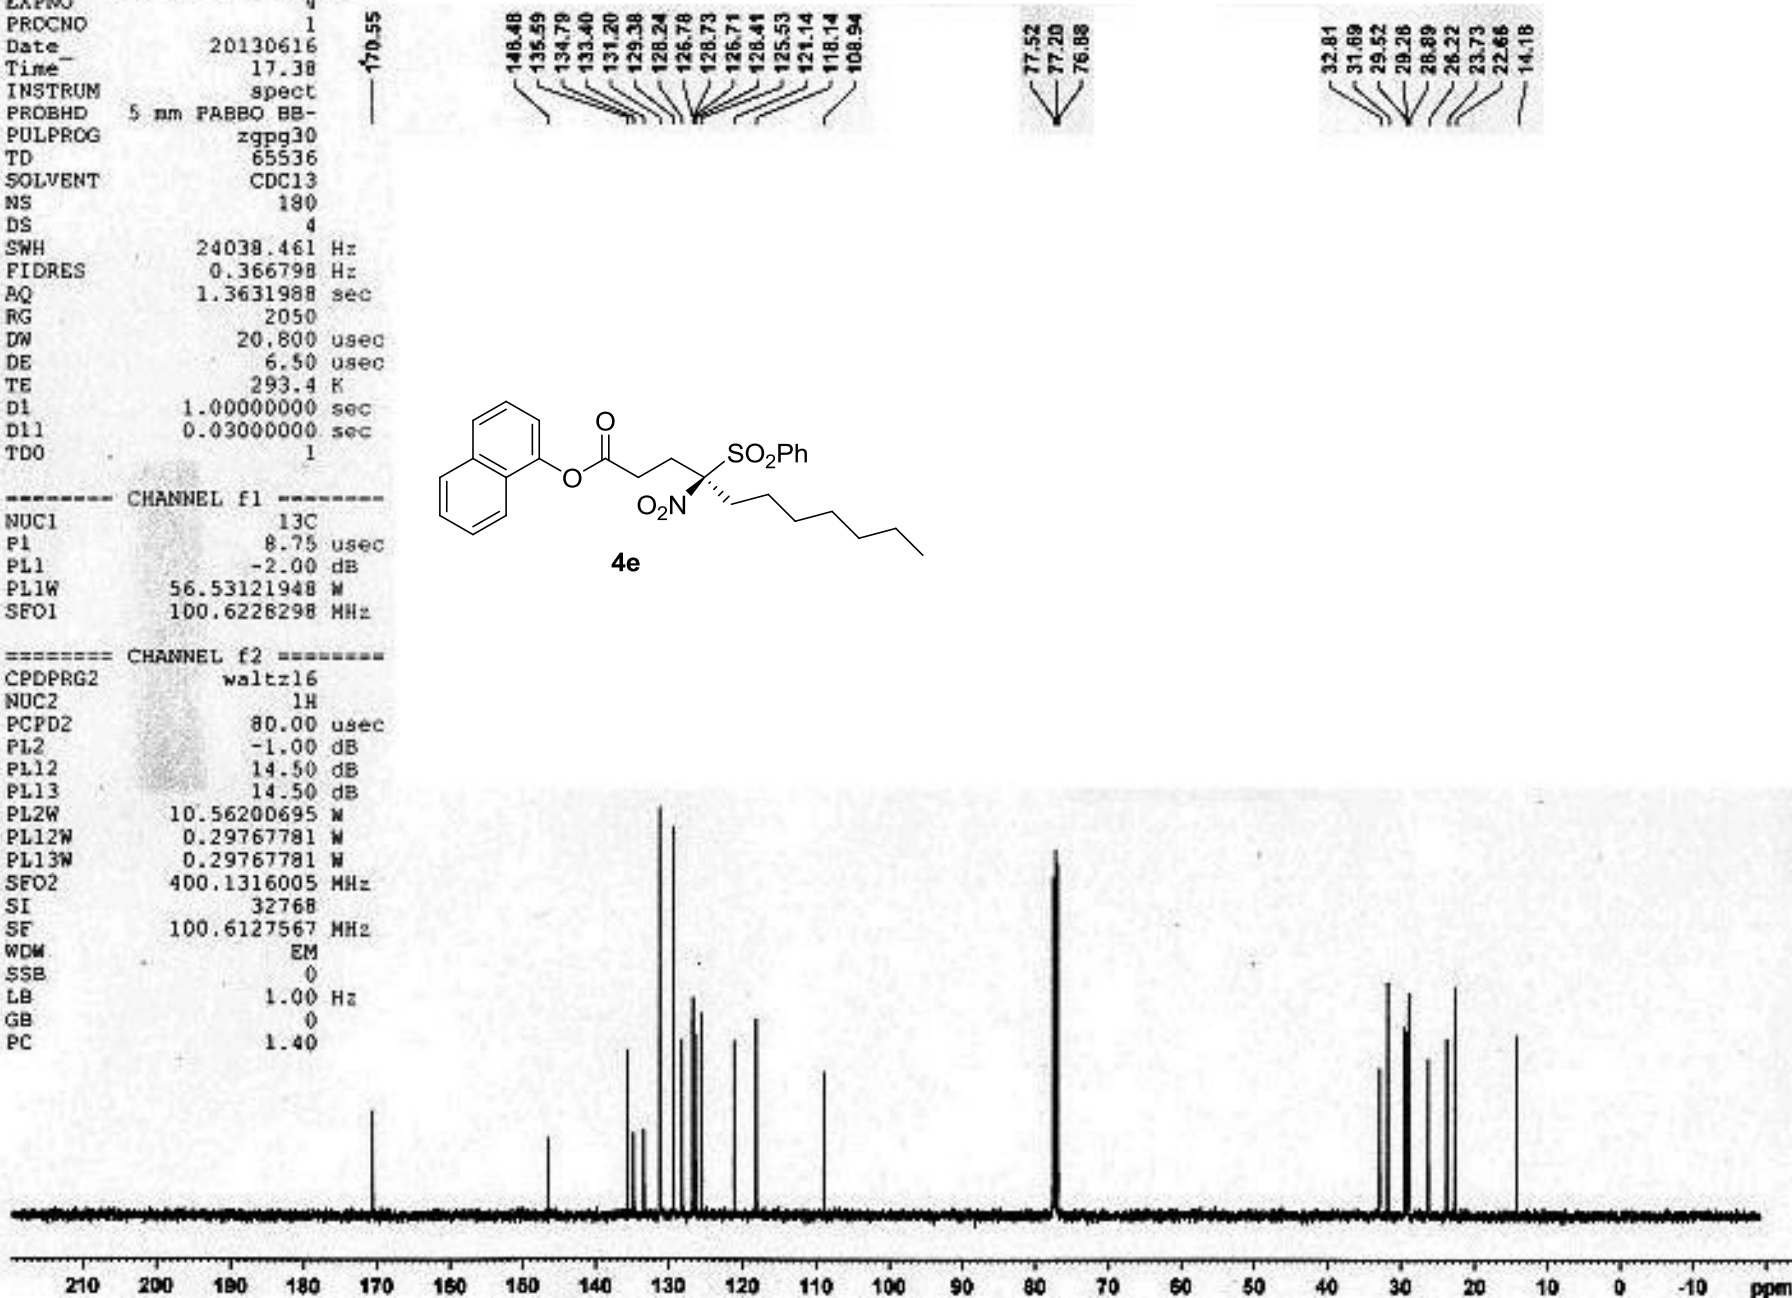

Fig S93. <sup>13</sup>C NMR Spectrum of 4e

# Chromatogram : ksb-4-CE1-1r-A-79\_channel4

System : Jasco HPLC  
 Method : ksb-20%-1f-250nm  
 User : User1

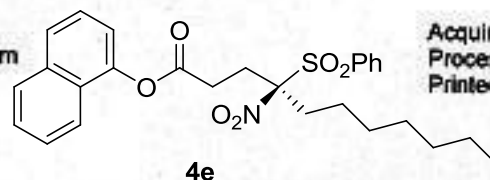

Acquired : 6/13/2013 1:58:46 AM  
 Processed : 6/13/2013 2:26:24 AM  
 Printed : 6/13/2013 2:48:41 AM

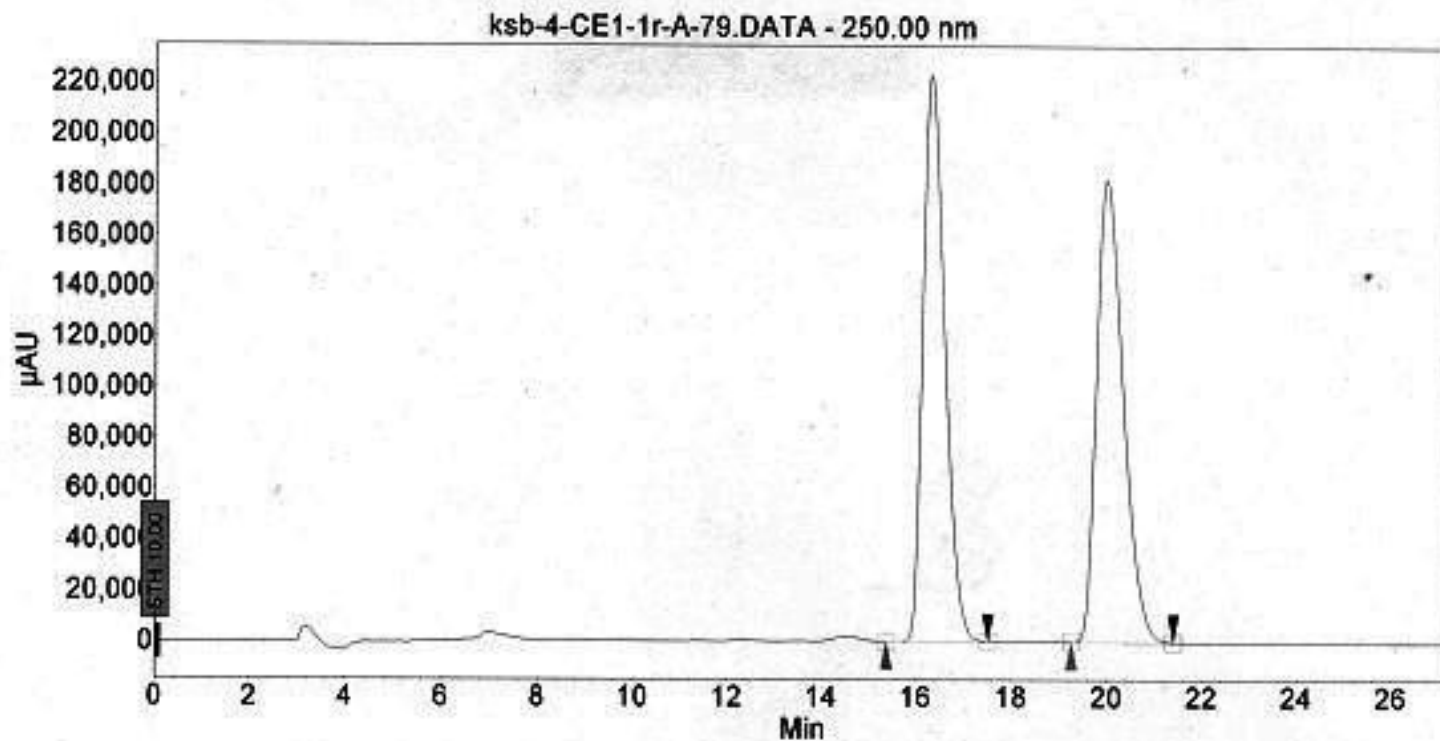

## Peak results :

| Index | Name    | Time [Min] | Quantity [% Area] | Height [μAU] | Area [μAU.Min] | Area % [%] |
|-------|---------|------------|-------------------|--------------|----------------|------------|
| 1     | UNKNOWN | 16.292     | 50.04             | 223315.5     | 118559.6       | 50.037     |
| 2     | UNKNOWN | 19.959     | 49.96             | 182832.6     | 118382.7       | 49.963     |
| Total |         |            | 100.00            | 406148.1     | 236942.3       | 100.000    |

Fig S94. HPLC Profile of Racemic 4e

# Chromatogram : ksb-4-CE1-1R-C-84\_channel4

System : Jasco HPLC  
Method : ksb-20%-1f-250nm  
User : User1

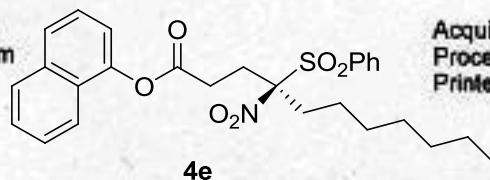

Acquired : 6/13/2013 2:28:54 AM  
Processed : 6/13/2013 2:54:31 AM  
Printed : 6/13/2013 2:56:34 AM

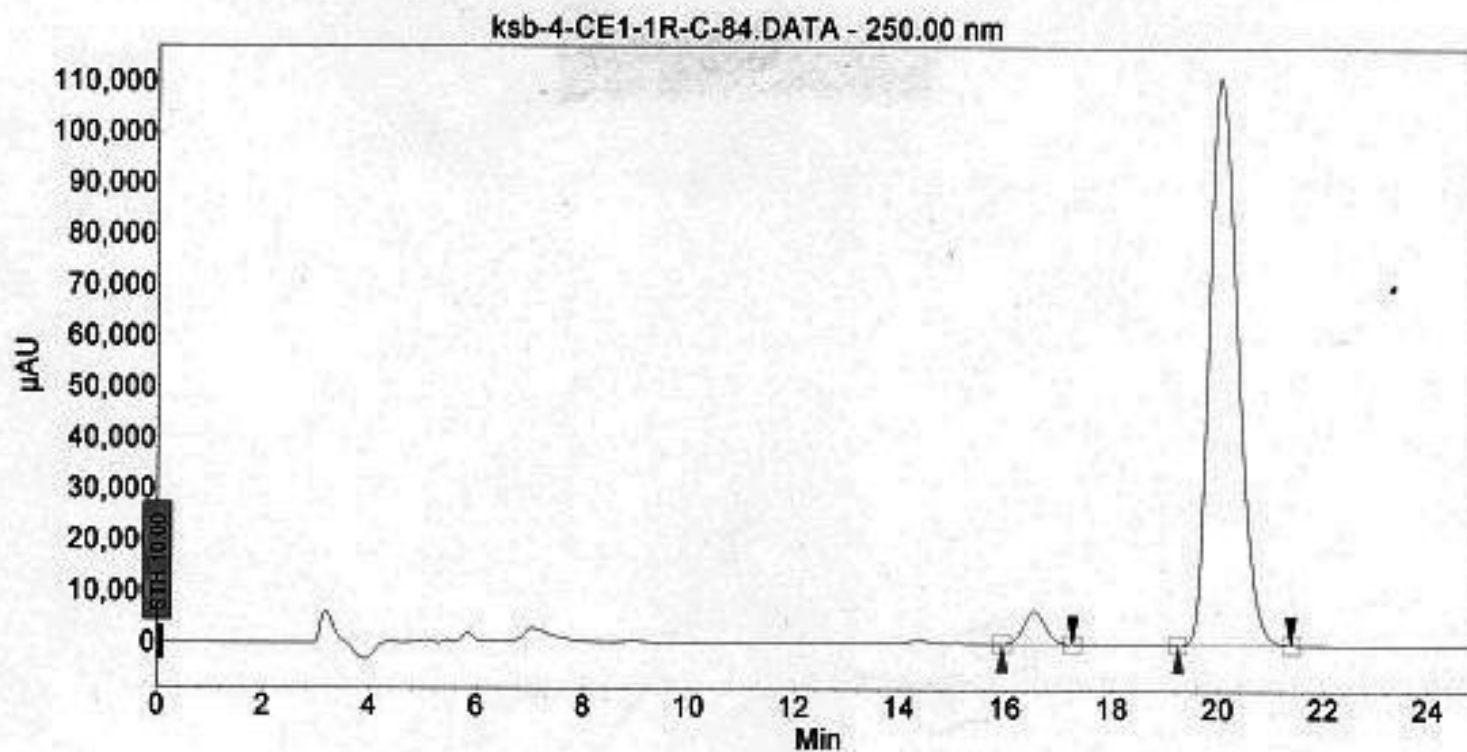

## Peak results :

| Index | Name    | Time [Min] | Quantity [% Area] | Height [μAU] | Area [μAU.Min] | Area % [%] |
|-------|---------|------------|-------------------|--------------|----------------|------------|
| 1     | UNKNOWN | 16.532     | 4.20              | 6403.6       | 2993.4         | 4.202      |
| 2     | UNKNOWN | 20.012     | 95.80             | 111026.2     | 68248.4        | 95.798     |
| Total |         |            | 100.00            | 117429.8     | 71241.8        | 100.000    |

Fig S95. HPLC Profile of Enantioenriched 4e

```

NAME      INN-4-KSB-B0C-1H
EXPNO     5
PROCNO    1
Date_     20130613
Time      20.10
INSTRUM   spect
PROBHD    5 mm PABBO BB-
PULPROG   zg30
TD         65536
SOLVENT   CDCl3
NS         11
DS         0
SWH        8223.685 Hz
FIDRES     0.125483 Hz
AQ         3.9846387 sec
RG         32
DW         60.800 usec
DE         6.50 usec
TE         294.5 K
D1         1.00000000 sec
ID0        1

```

```

===== CHANNEL f1 =====
NUC1      1H
P1        13.50 usec
PL1       -1.00 dB
PL1W      10.56200695 W
SFO1      400.1324710 MHz
SI         32768
SF         400.1300095 MHz
WDW        EM
SSB        0
LB         0.30 Hz
GB         0
PC         1.00

```

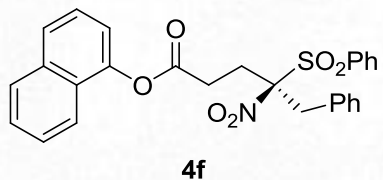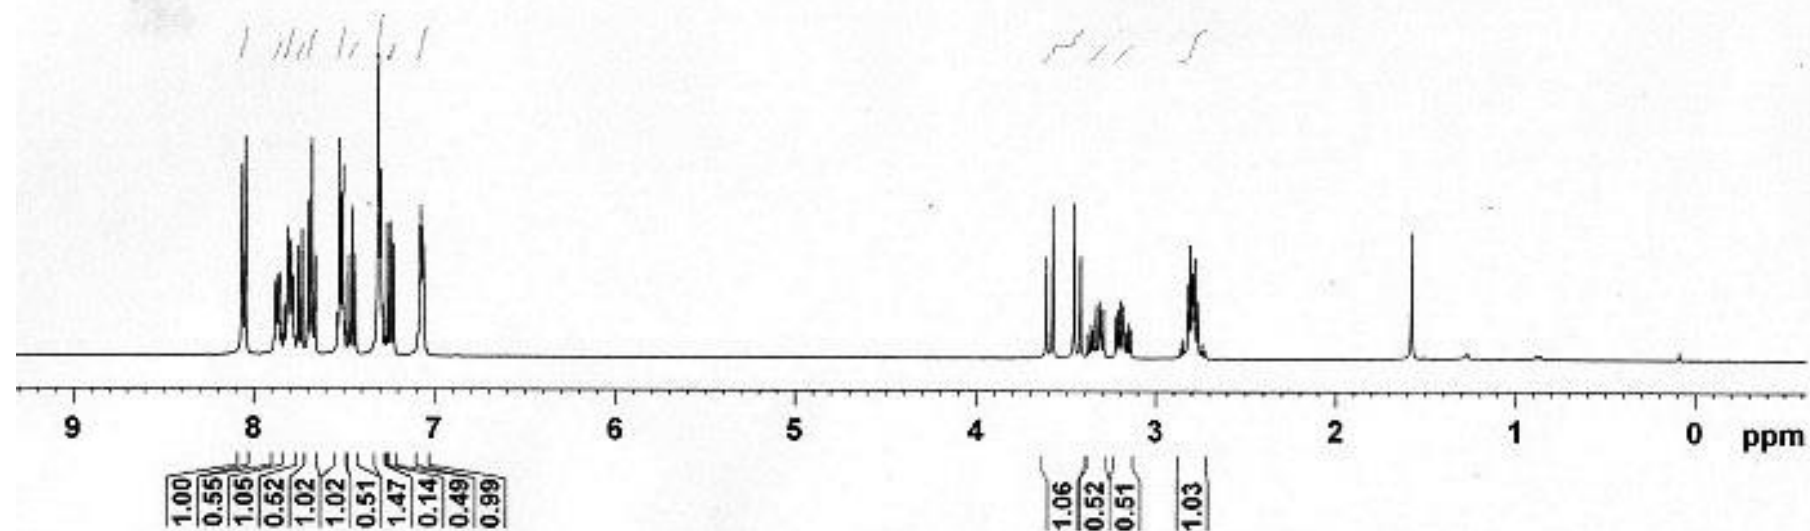

Fig S96. <sup>1</sup>H NMR Spectrum of 4f

```

NAME      INN-4-KSB-80C-13C
EXPNO     5
PROCNO    1
Date_     20130613
Time      20.12
INSTRUM   spect
PROBHD    5 mm PABBO BB-
PULPROG   zgpg30
TD         65536
SOLVENT   CDCl3
NS         62
DS         4
SWH        24038.461 Hz
FIDRES    0.366798 Hz
AQ         1.3631988 sec
RG         2050
DM         20.800 usec
DE         6.50 usec
TE         294.9 K
D1         1.00000000 sec
D11        0.03000000 sec
TDO       1

```

```

----- CHANNEL f1 -----
NUC1      13C
P1         8.75 usec
PL1        -2.00 dB
PL1W      56.53121948 W
SFO1      100.6228298 MHz

```

```

----- CHANNEL f2 -----
CPDPRG2   waltz16
NUC2       1H
PCPD2     80.00 usec
PL2        -1.00 dB
PL12       14.50 dB
PL13       14.50 dB
PL2W      10.56200695 W
PL12W     0.29767781 W
PL13W     0.29767781 W
SFO2      400.1316005 MHz
SI         32768
SF         100.6127556 MHz
WDM        EM
SSB         0
LB          1.00 Hz
GB          0
PC          1.40

```

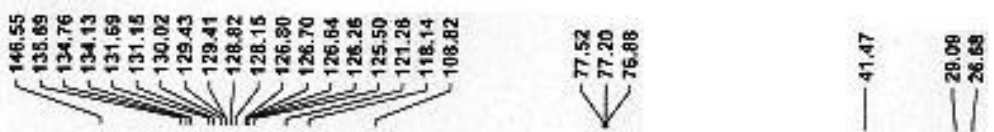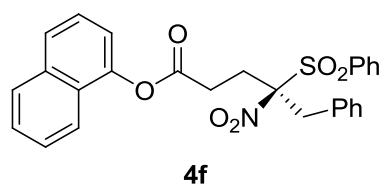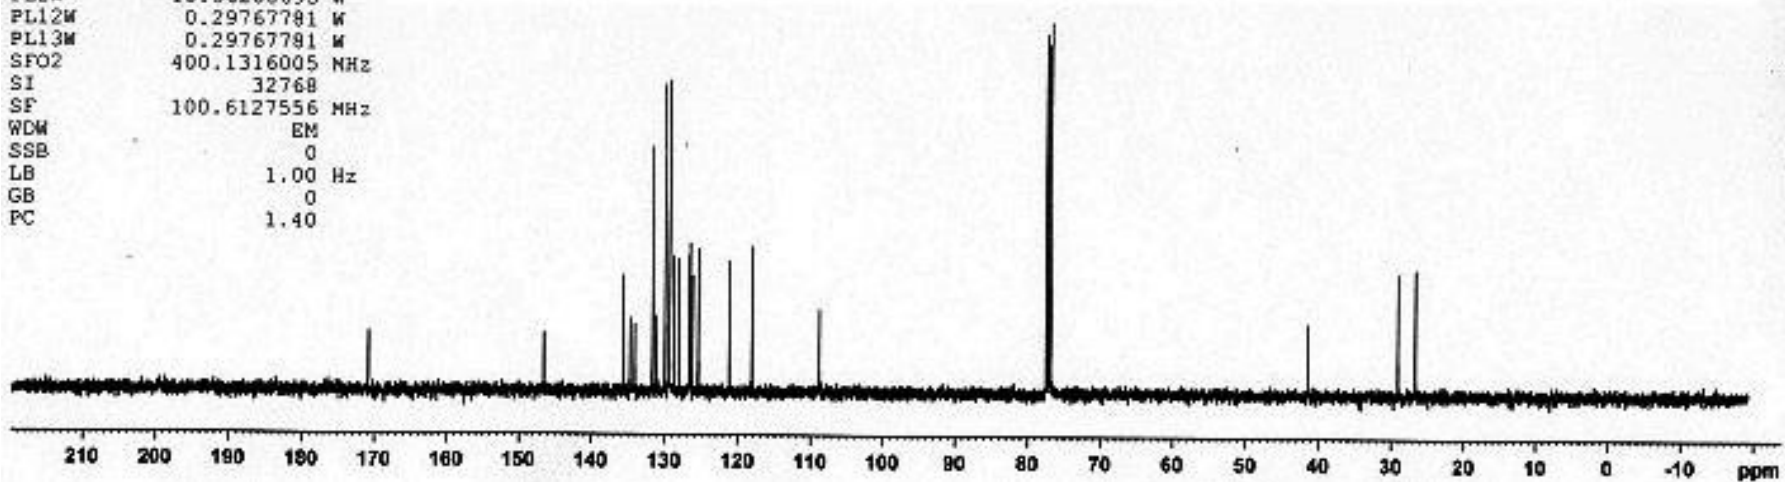

Fig S97. <sup>13</sup>C NMR Spectrum of 4f

# Chromatogram : KSB-4-CE1-1R-C-80\_channel4

System : Jasco HPLC  
Method : ksb-20%-1f-250nm  
User : User1

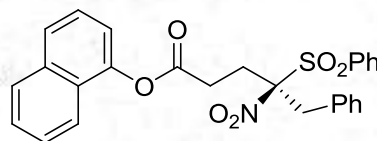

4f

Acquired : 6/12/2013 11:20:04 PM  
Processed : 6/12/2013 11:52:23 PM  
Printed : 6/12/2013 11:52:31 PM

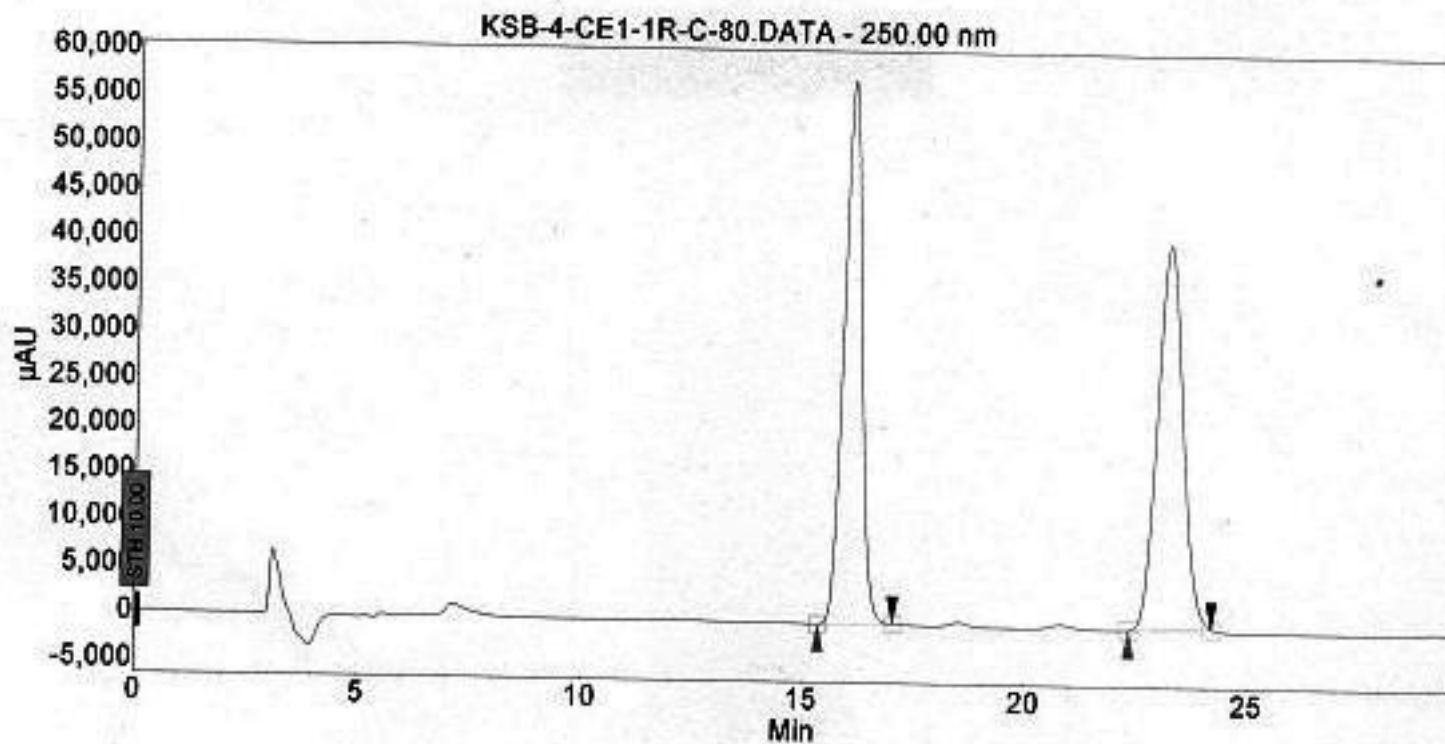

## Peak results :

| Index | Name    | Time [Min] | Quantity [% Area] | Height [μAU] | Area [μAU.Min] | Area % [%] |
|-------|---------|------------|-------------------|--------------|----------------|------------|
| 1     | UNKNOWN | 16.026     | 50.00             | 57740.0      | 27055.0        | 49.999     |
| 2     | UNKNOWN | 23.158     | 50.00             | 40910.7      | 27056.0        | 50.001     |
| Total |         |            | 100.00            | 98650.7      | 54111.0        | 100.000    |

Fig S98. HPLC Profile of Racemic 4f

# Chromatogram : KSB-4-CE-1R-C-83\_channel4

System : Jasco HPLC  
Method : ksb-20%-1f-250nm  
User : User1

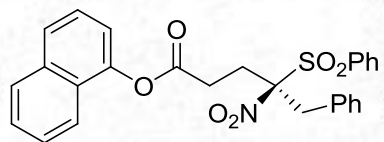

4f

Acquired : 6/12/2013 11:51:09 PM  
Processed : 6/13/2013 12:20:07 AM  
Printed : 6/13/2013 12:20:16 AM

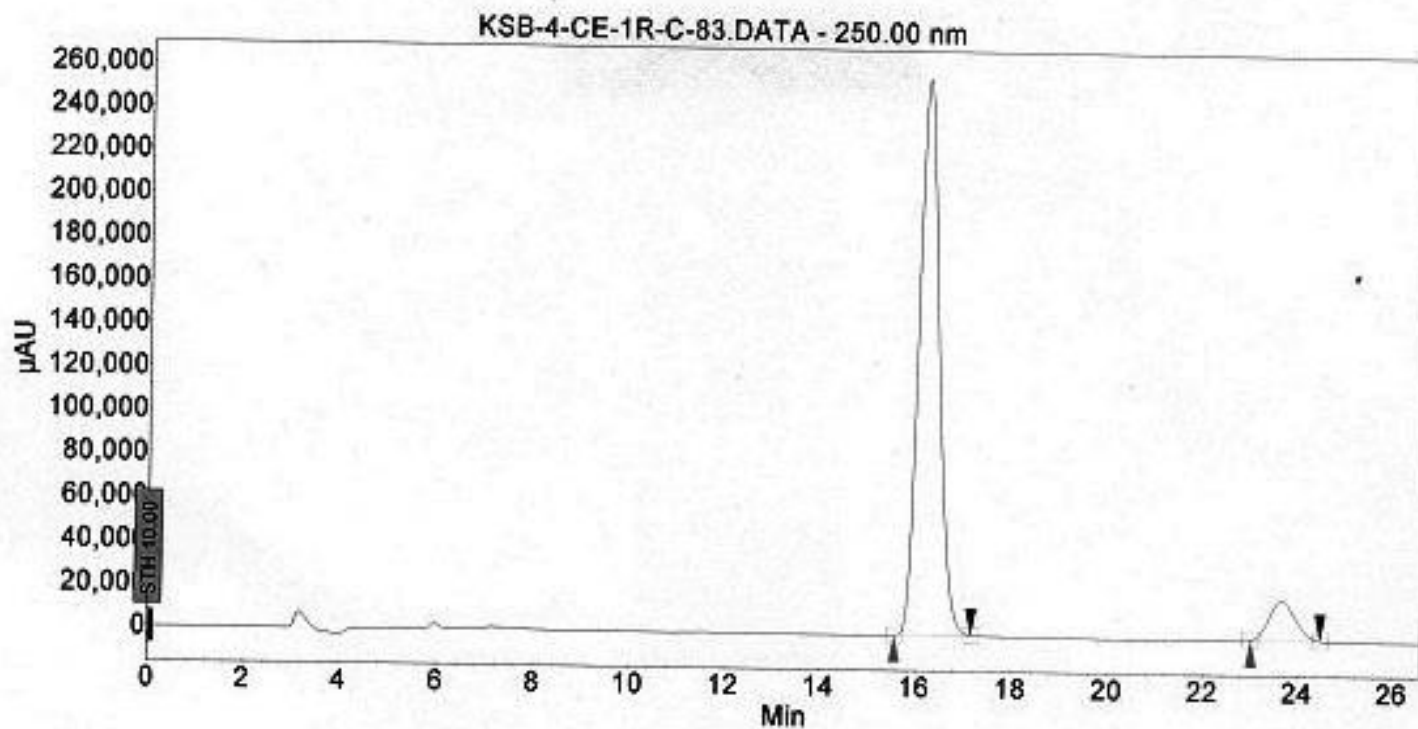

## Peak results :

| Index | Name    | Time [Min] | Quantity [% Area] | Height [μAU] | Area [μAU.Min] | Area % [%] |
|-------|---------|------------|-------------------|--------------|----------------|------------|
| 1     | UNKNOWN | 16.185     | 91.36             | 258465.1     | 124937.0       | 91.363     |
| 2     | UNKNOWN | 23.638     | 8.64              | 18332.0      | 11810.2        | 8.637      |
| Total |         |            | 100.00            | 274797.1     | 136747.2       | 100.000    |

Fig S99. HPLC Profile of Enantioenriched 4f

```

NAME      inn-3-ksb-154c-1h
EXPNO     4
PROCNO    1
Date_     20120927
Time      19.12
INSTRUM   spect
PROBHD    5 mm PABBO BB-
PULPROG   zg30
TD         65536
SOLVENT   CDCl3
NS         7
DS         0
SWH        8223.685 Hz
FIDRES     0.125483 Hz
AQ         3.9846387 sec
RG         128
DW         60.800 usec
DE         6.50 usec
TE         300.0 K
D1         1.00000000 sec
TD0        1

```

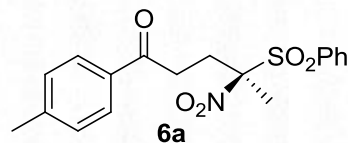

```

----- CHANNEL f1 -----
NUC1      1H
P1        13.50 usec
PL1       -1.00 dB
PL1W      10.56200695 W
SFO1      400.1324710 MHz
SI         32768
SF         400.1300095 MHz
WDW        EM
SSB        0
LB         0.30 Hz
GB         0
PC         1.00

```

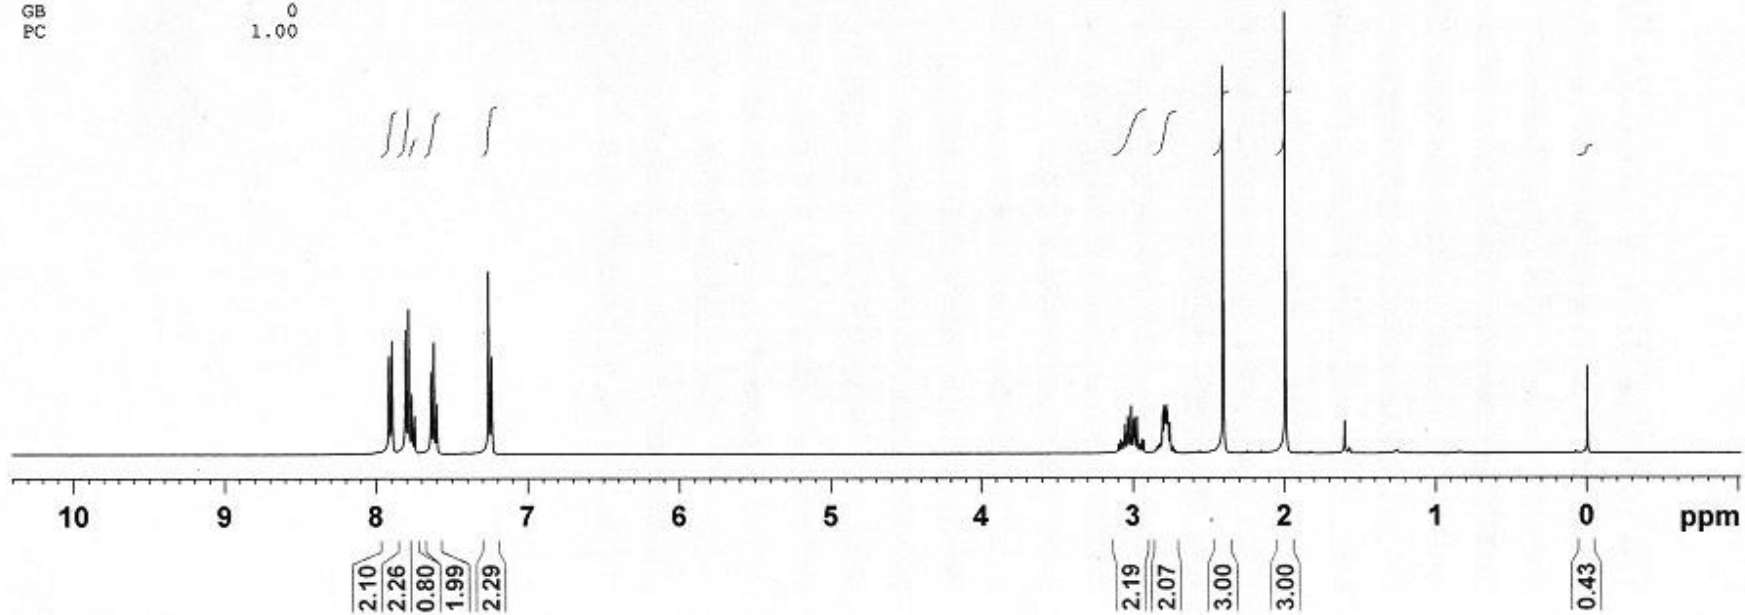

Fig S100. <sup>1</sup>H NMR Spectrum of 6a



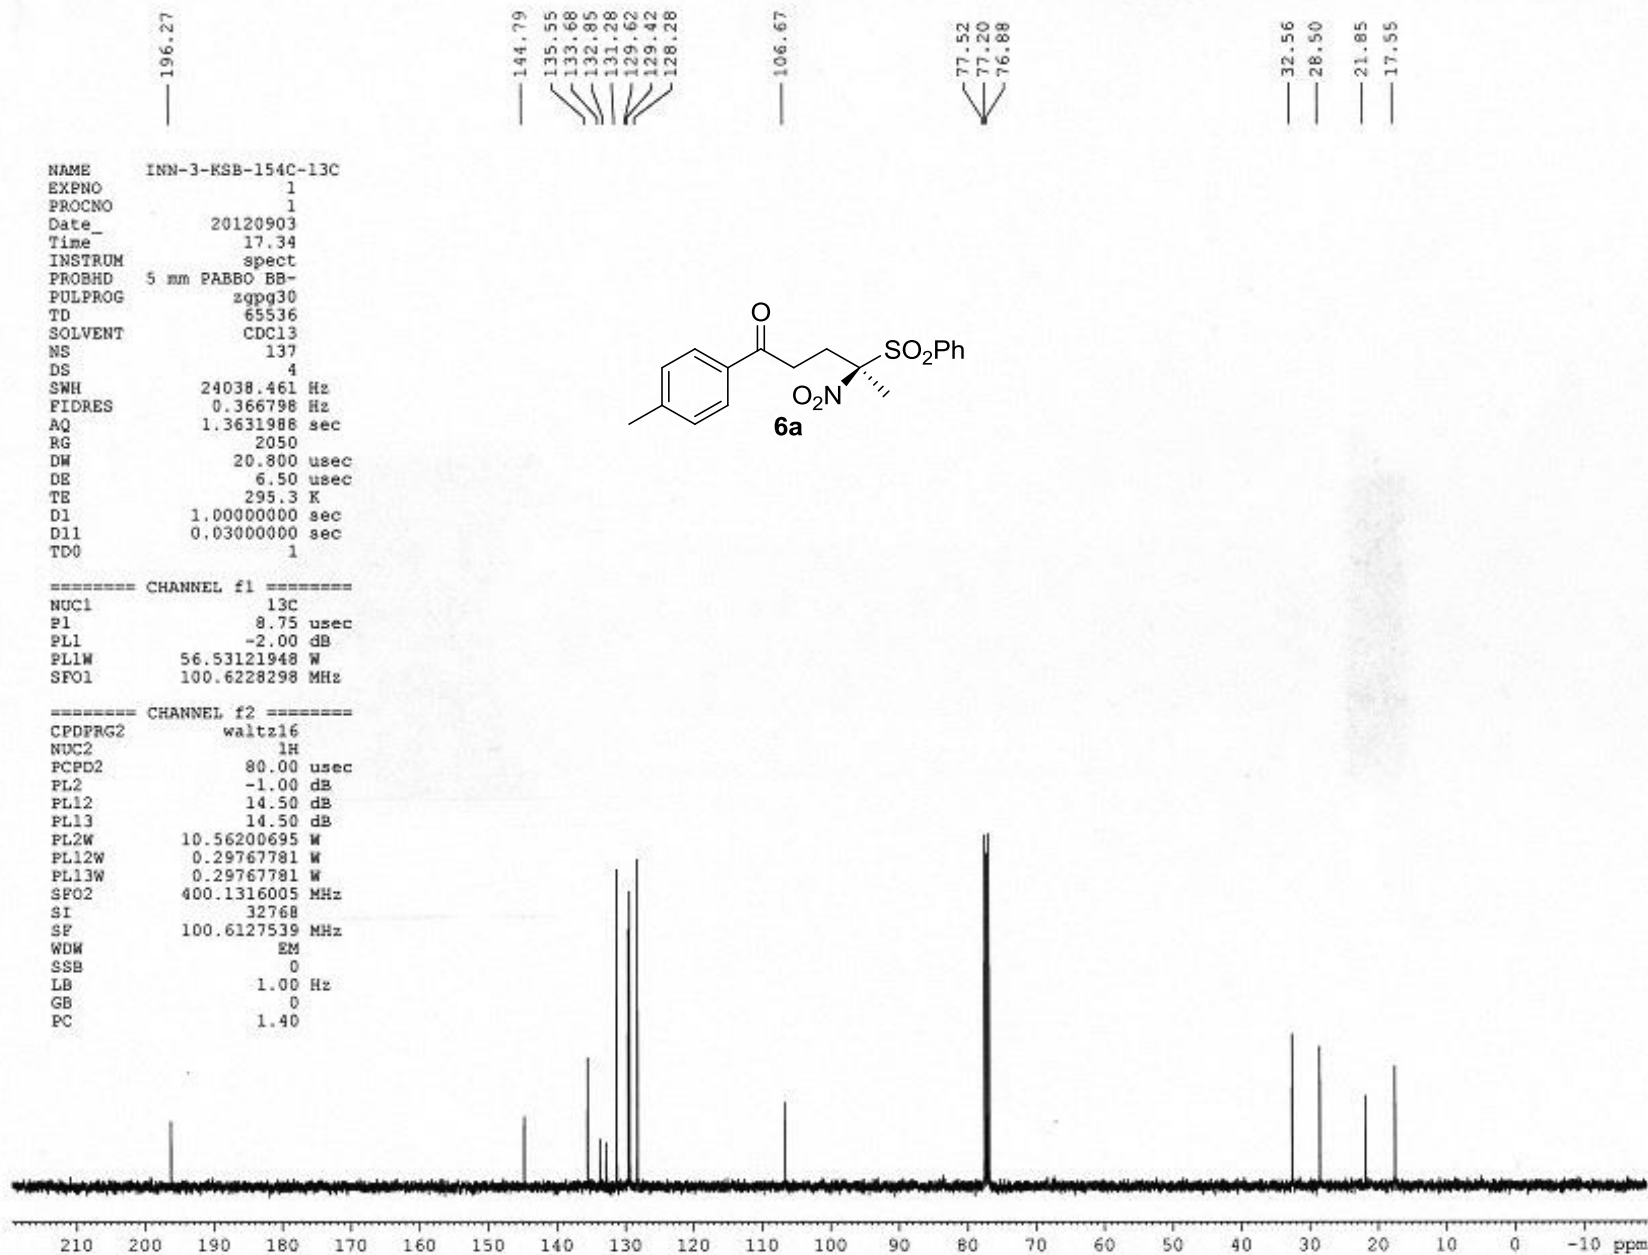

Fig S101. <sup>13</sup>C NMR Spectrum of 6a

# Chromatogram : ksb-3-AM2-1r-C-154\_channel2

System : Jasco HPLC  
 Method : ksb-30%-1f-250nm  
 User : User1

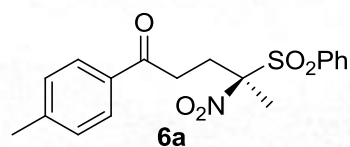

Acquired : 5/7/2014 9:49:36 AM  
 Processed : 5/7/2014 11:13:53 AM  
 Printed : 5/21/2014 1:10:44 PM

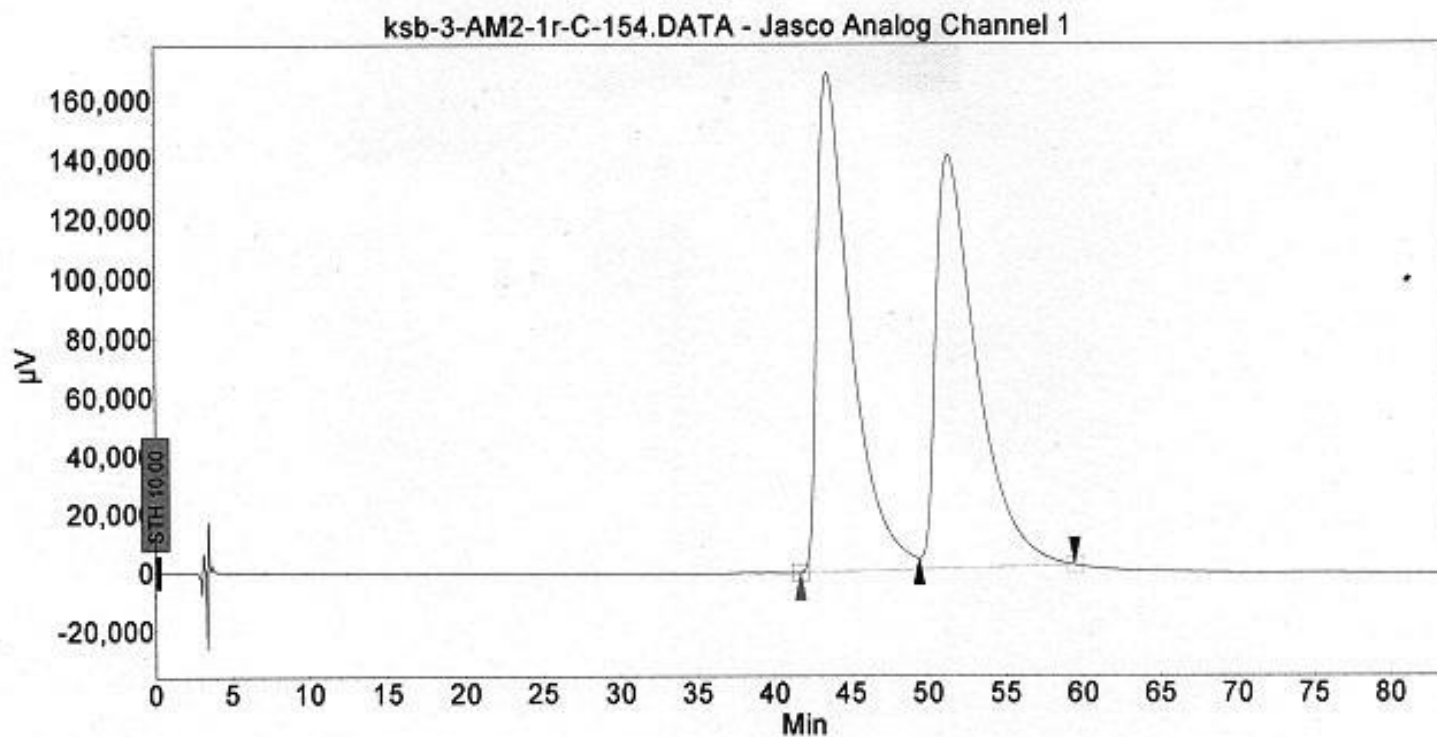

## Peak results :

| Index | Name    | Time [Min] | Quantity [% Area] | Height [μV] | Area [μV.Min] | Area % [%] |
|-------|---------|------------|-------------------|-------------|---------------|------------|
| 1     | UNKNOWN | 43.533     | 49.97             | 169000.2    | 431839.3      | 49.966     |
| 2     | UNKNOWN | 51.392     | 50.03             | 140072.2    | 432429.8      | 50.034     |
| Total |         |            | 100.00            | 309072.4    | 864269.1      | 100.000    |

Fig S102. HPLC Profile of Racemic 6a

# Chromatogram : ksb-4-AM-1r-A-162\_channel4

System : Jasco HPLC  
Method : ksb-30%-1f-250nm  
User : User1

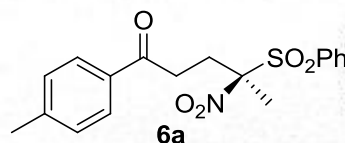

Acquired : 5/7/2014 11:15:03 AM  
Processed : 5/7/2014 1:06:21 PM  
Printed : 5/21/2014 1:08:19 PM

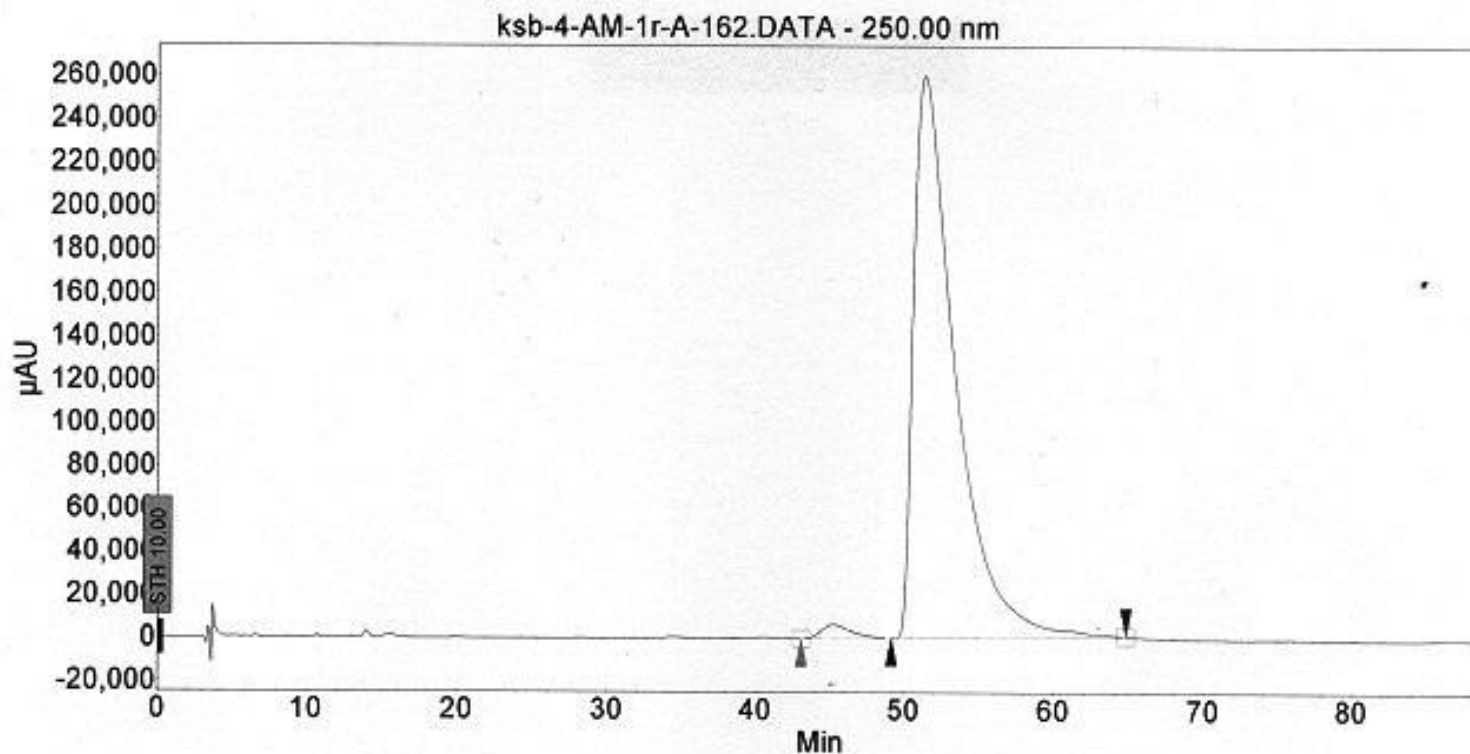

## Peak results :

| Index | Name    | Time [Min] | Quantity [% Area] | Height [μAU] | Area [μAU.Min] | Area % [%] |
|-------|---------|------------|-------------------|--------------|----------------|------------|
| 1     | UNKNOWN | 45.250     | 1.70              | 6380.4       | 14598.2        | 1.699      |
| 2     | UNKNOWN | 51.328     | 98.30             | 259840.5     | 844374.1       | 98.301     |
| Total |         |            | 100.00            | 266220.9     | 858972.4       | 100.000    |

Fig S103. HPLC Profile of Enantioenriched 6a

Current Data Parameters  
NAME INN-4-KSB-161A-1H  
EXPMO 6  
PROCNO 1

F2 - Acquisition Parameters  
Date\_ 20140507  
Time 15.40  
INSTRUM spect  
PROBHD 5 mm PABBO BB/  
PULPROG zg30  
TD 59998  
SOLVENT CDCl3  
NS 17  
DS 0  
SWH 10000.000 Hz  
FIDRES 0.166672 Hz  
AQ 2.9999001 sec  
RG 48.36  
DN 50.000 usec  
DE 6.50 usec  
TE 299.3 K  
D1 1.00000000 sec  
TDO 1

===== CHANNEL f1 =====  
SFO1 500.1335009 MHz  
NUC1 1H  
P1 11.00 usec  
PLW1 13.00000000 W

F2 - Processing parameters  
SI 65536  
SF 500.1300044 MHz  
WDW EM  
SSB 0  
LB 0.10 Hz  
GB 0  
PC 1.00

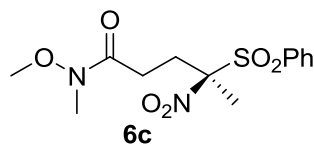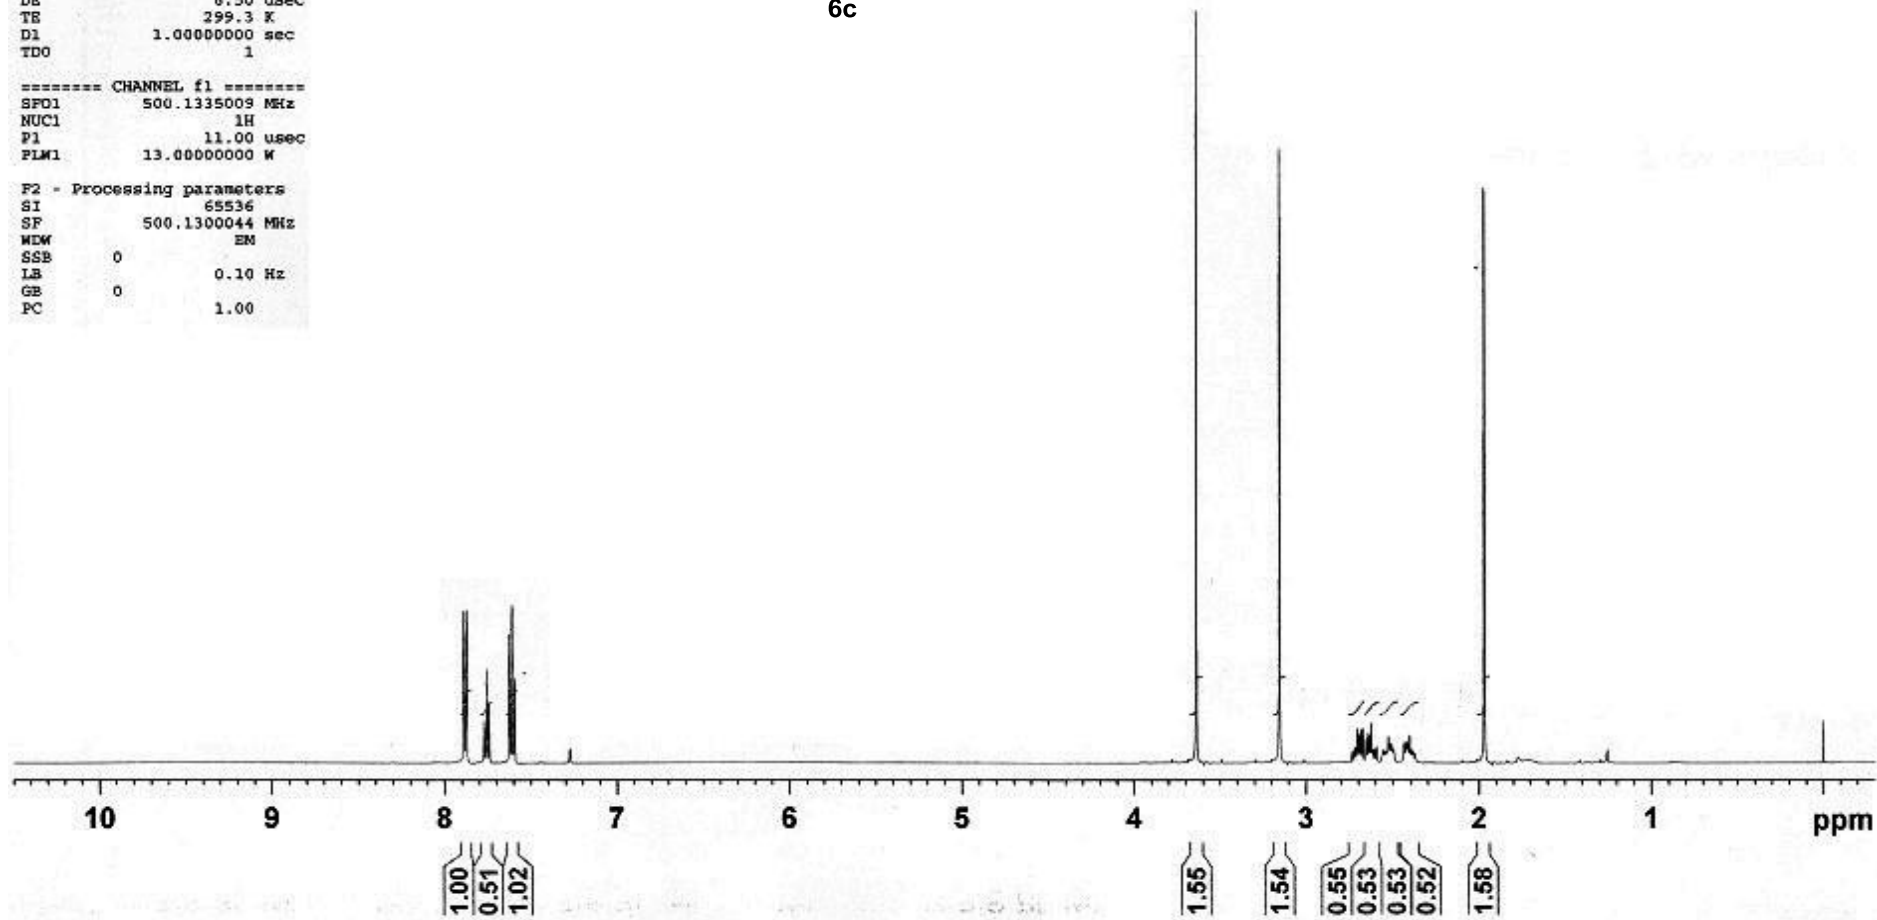

Fig S104. <sup>1</sup>H NMR Spectrum of 6c

```

Current Data Parameters
NAME      INN-4-KSB-161A-1p45
EXPNO    1
PROCNO   1
F2 - Acquisition Parameters
Date_    20140507
Time     16.42
INSTRUM  spect
PROBHD   5 mm BBO BB/
PULPROG  zgpg30
TD       65536
SOLVENT  CDCl3
NS       100
DS       4
SNH      29761.904 Hz
FIDRES   0.454131 Hz
AQ       1.1010048 sec
RG       197.27
DW       16.800 usec
DE       6.50 usec
TE       299.9 K
D1       1.00000000 sec
D11      0.03000000 sec
TDO      1

```

```

----- CHANNEL f1 -----
SFO1    125.7703637 MHz
NUC1     13C
P1       8.90 usec
PLW1    103.00000000 W

===== CHANNEL f2 =====
SFO2    500.1320005 MHz
NUC2     1H
CPDPRG2  waltz16
PCPD2    80.00 usec
PLW2    13.00000000 W
PLW12   0.34327999 W
PLW13   0.21969999 W

```

```

F2 - Processing parameters
SI       32768
SF       125.7577718 MHz
WDW      EM
SSB      0
LB       1.00 Hz
GB       0
PC       1.40

```

135.48  
132.83  
131.24  
129.37

106.65

77.45  
77.20  
76.85

61.49

32.43  
28.58  
26.38

17.10

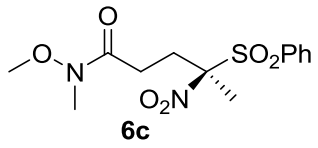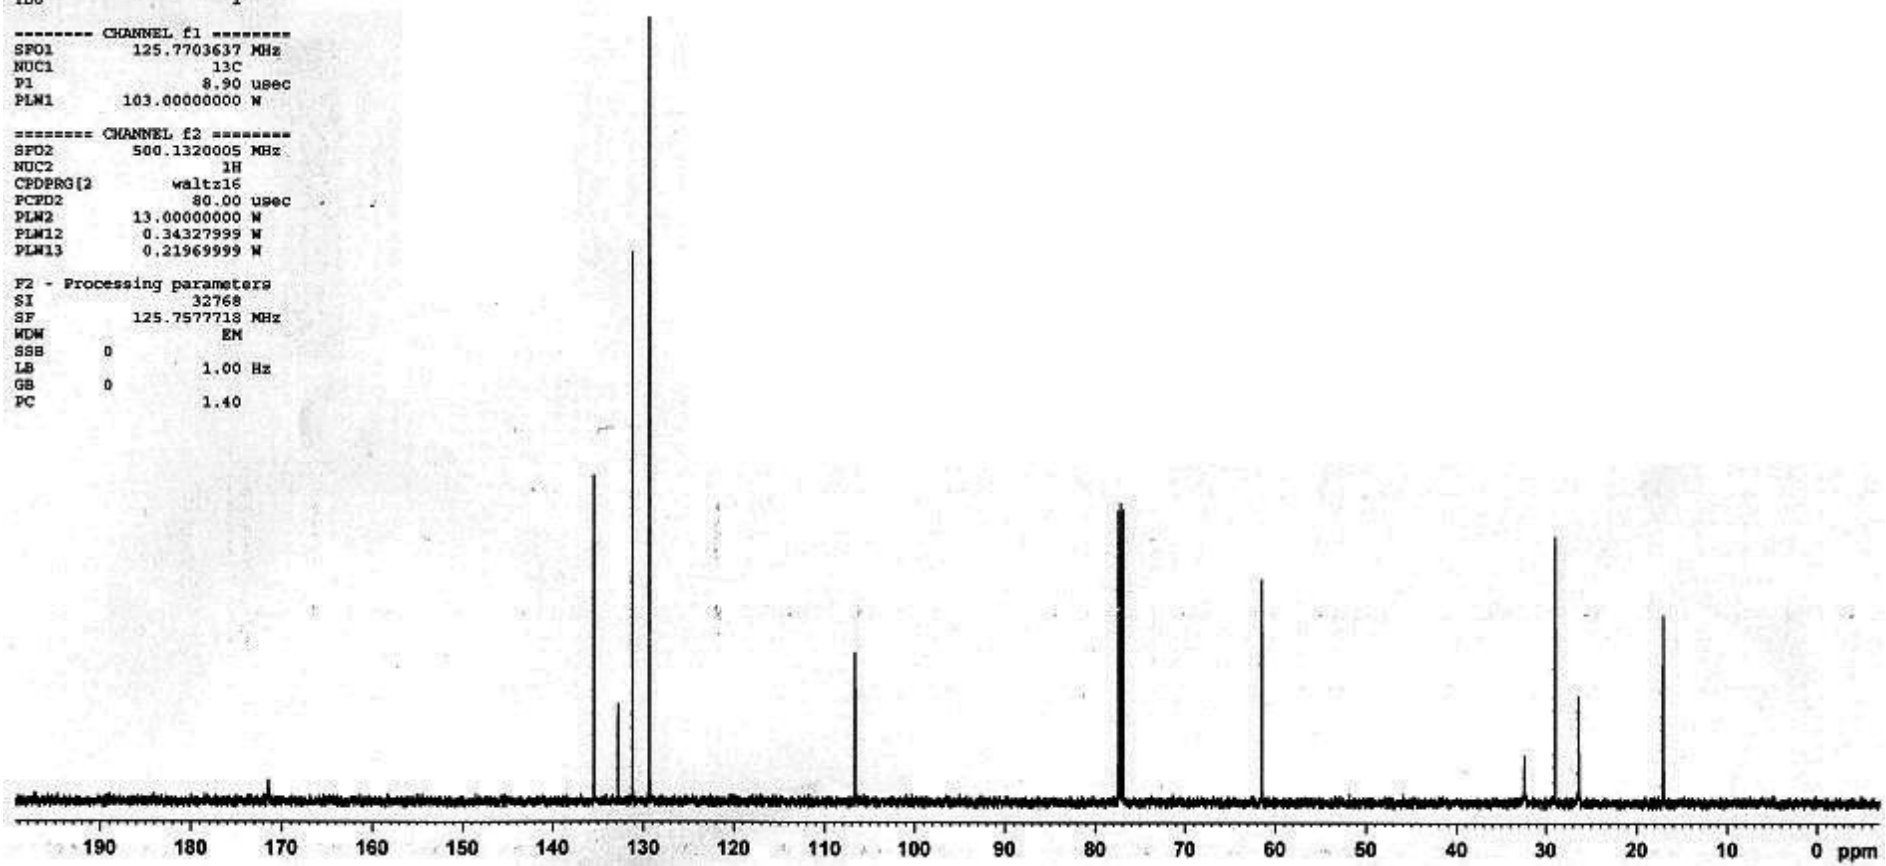

Fig S105. <sup>13</sup>C NMR Spectrum of 6c

# Chromatogram : ksb-4-ADH-2r-A-161\_channel2

System : Jasco HPLC  
Method : 30%-1f-212nm  
User : User1

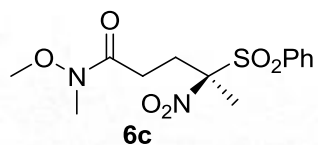

Acquired : 5/6/2014 10:02:11 PM  
Processed : 5/6/2014 10:23:26 PM  
Printed : 5/6/2014 10:23:35 PM

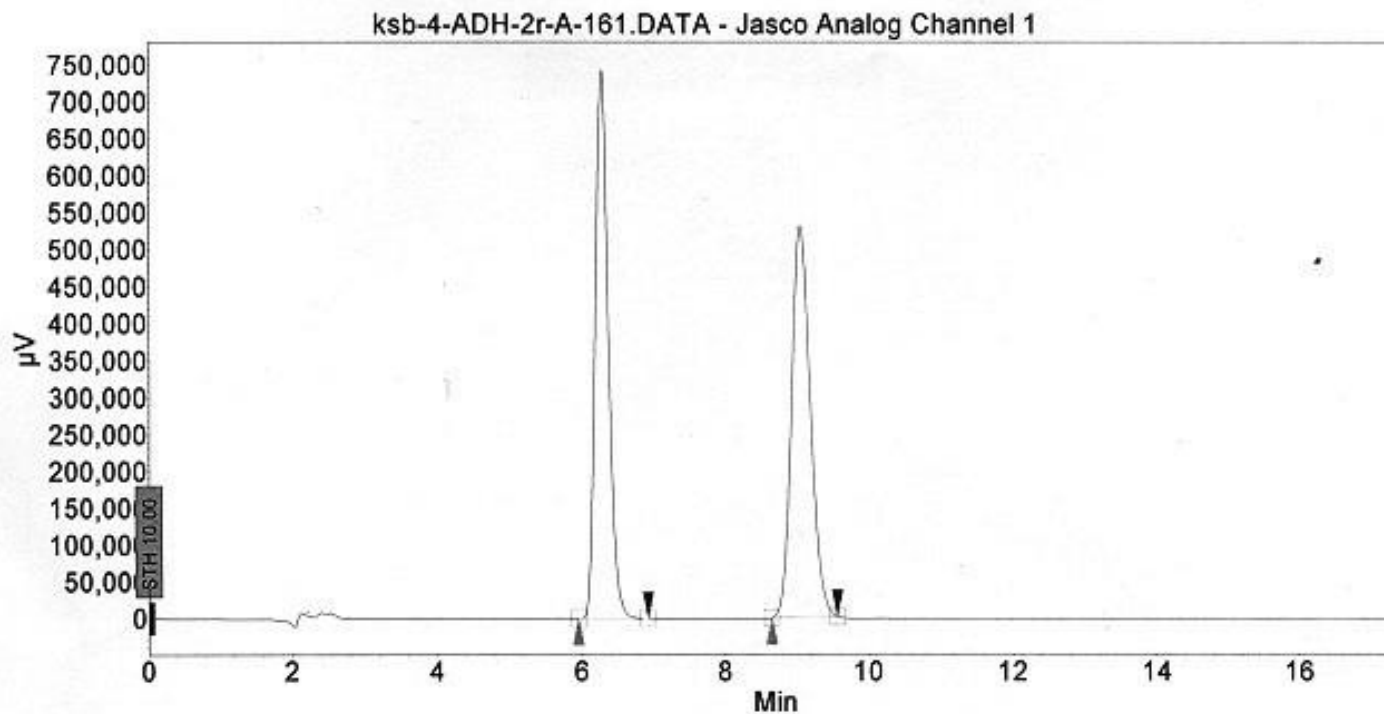

## Peak results :

| Index | Name    | Time [Min] | Quantity [% Area] | Height [μV] | Area [μV.Min] | Area % [%] |
|-------|---------|------------|-------------------|-------------|---------------|------------|
| 1     | UNKNOWN | 6.267      | 49.16             | 743491.3    | 156360.9      | 49.160     |
| 2     | UNKNOWN | 9.050      | 50.84             | 529815.8    | 161704.6      | 50.840     |
| Total |         |            | 100.00            | 1273307.1   | 318065.6      | 100.000    |

Fig S106. HPLC Profile of Racemic 6c

## Chromatogram : ksb-4-ADH-1r-B-162\_channel2

System : Jasco HPLC  
Method : 30%-1f-212nm  
User : User1

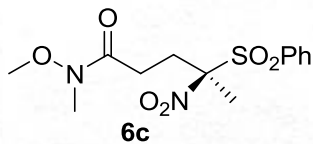

Acquired : 5/6/2014 10:21:59 PM  
Processed : 5/6/2014 10:39:12 PM  
Printed : 5/6/2014 10:42:11 PM

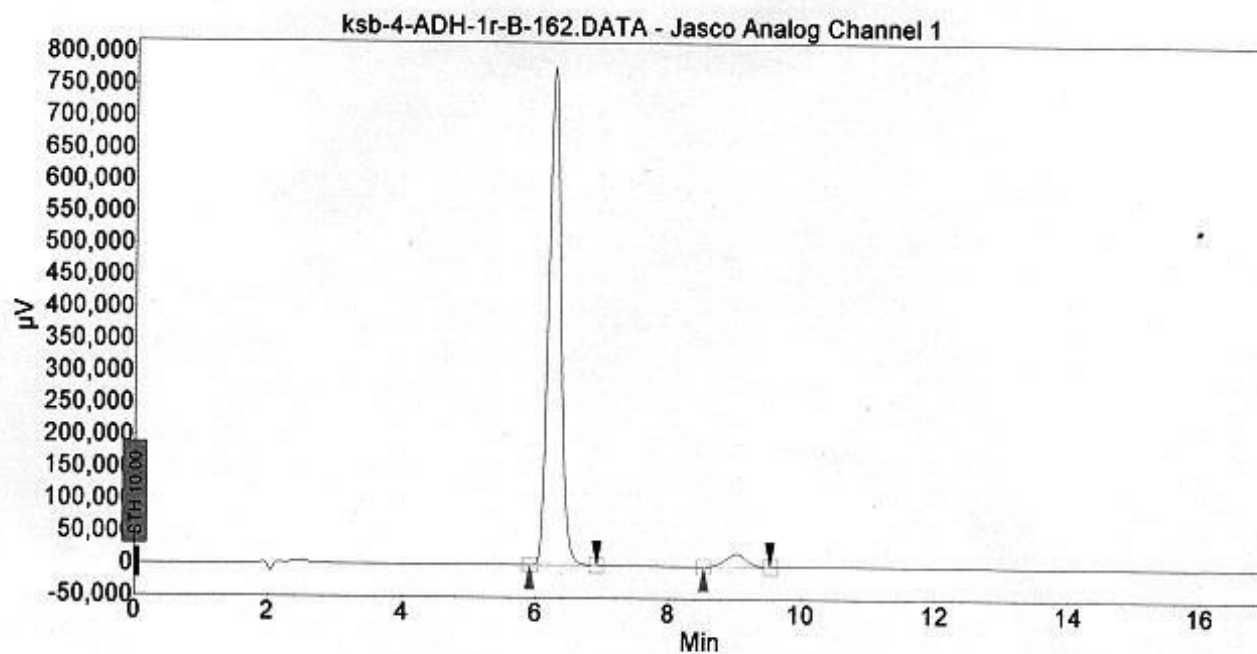

### Peak results :

| Index | Name    | Time [Min] | Quantity [% Area] | Height [µV] | Area [µV.Min] | Area % [%] |
|-------|---------|------------|-------------------|-------------|---------------|------------|
| 1     | UNKNOWN | 6.242      | 95.86             | 777788.2    | 165828.1      | 95.858     |
| 2     | UNKNOWN | 9.033      | 4.14              | 20017.7     | 7165.0        | 4.142      |
| Total |         |            | 100.00            | 797805.9    | 172993.1      | 100.000    |

Fig S107. HPLC Profile of Enantioenriched 6c

Current Data Parameters  
NAME INN-4-KSB-161b-1H  
EXPNO 7  
PROCNO 1

F2 - Acquisition Parameters  
Date\_ 20140507  
Time 15.47  
INSTRUM spect  
PROBHD 5 mm PABBO BB/  
PULPROG zg30  
TD 59998  
SOLVENT CDCl3  
NS 15  
DS 0  
SWH 10000.000 Hz  
FIDRES 0.166672 Hz  
AQ 2.9999001 sec  
RG 80.35  
DW 50.000 usec  
DE 6.50 usec  
TE 299.2 K  
D1 1.0000000 sec  
TDO 1

----- CHANNEL f1 -----  
SF01 500.1335009 MHz  
NUC1 1H  
P1 11.00 usec  
PLW1 13.00000000 W

F2 - Processing parameters  
SI 65536  
SF 500.1300093 MHz  
WDW EM  
SSB 0  
LB 0.10 Hz  
GB 0  
PC 1.00

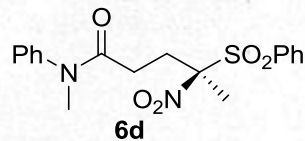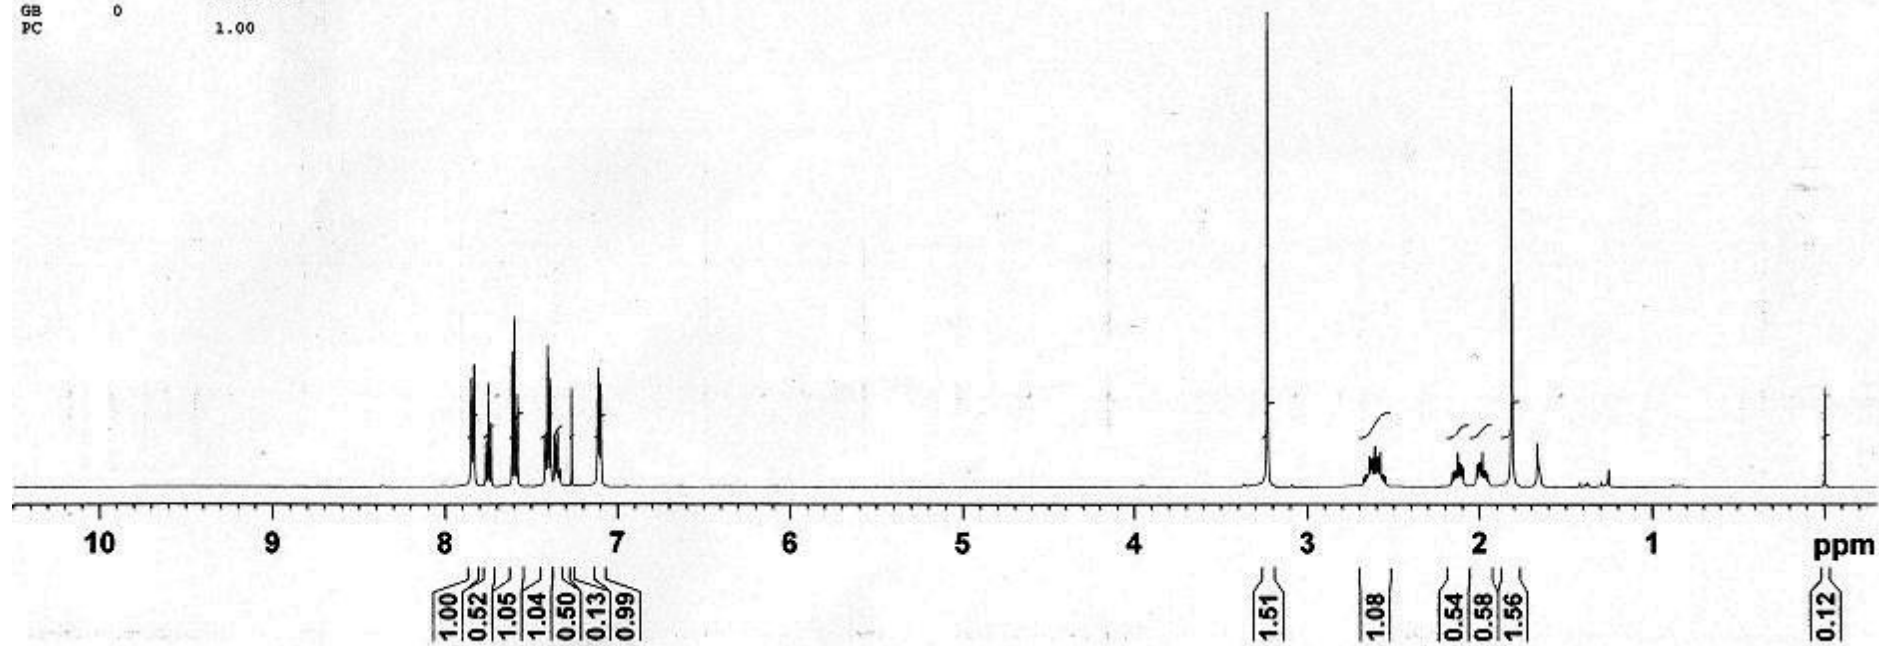

Fig S108. <sup>1</sup>H NMR Spectrum of 6d



Current Data Parameters  
NAME: INM-4-KSB-161B-13C  
EXPMO: 2  
PROCNO: 1

F2 - Acquisition Parameters  
Date: 20140507  
Time: 16.49  
INSTRUM: spect  
PROBHD: 5 mm PABBO BB/  
PULPROG: zgpg30  
TD: 65536  
SOLVENT: CDCl3  
NS: 64  
DS: 4  
SWH: 29761.904 Hz  
FIDRES: 0.454131 Hz  
AQ: 1.1010048 sec  
RG: 197.27  
SW: 16.800 usec  
DE: 6.50 usec  
TE: 300.4 K  
D1: 1.0000000 sec  
D11: 0.0300000 sec  
TDO: 1

----- CHANNEL f1 -----  
SP01: 125.7703637 MHz  
NUC1: 13C  
P1: 8.90 usec  
PLW1: 103.0000000 W

----- CHANNEL f2 -----  
SP02: 500.1320005 MHz  
NUC2: 1H  
CPDPRG2: waltz16  
PCPD2: 80.00 usec  
PLW2: 13.0000000 W  
PLW12: 0.34327999 W  
PLW13: 0.21969999 W

F2 - Processing parameters  
SI: 32768  
SF: 125.7577682 MHz  
WDW: RM  
SSB: 0  
LB: 1.00 Hz  
GB: 0  
PC: 1.40

169.99

143.31  
135.45  
132.84  
131.27  
130.28  
129.35  
128.52  
127.19

106.57

77.45  
77.20  
76.99

37.69

29.93  
28.43

16.80

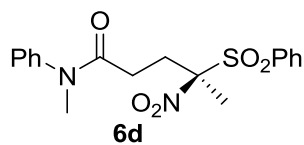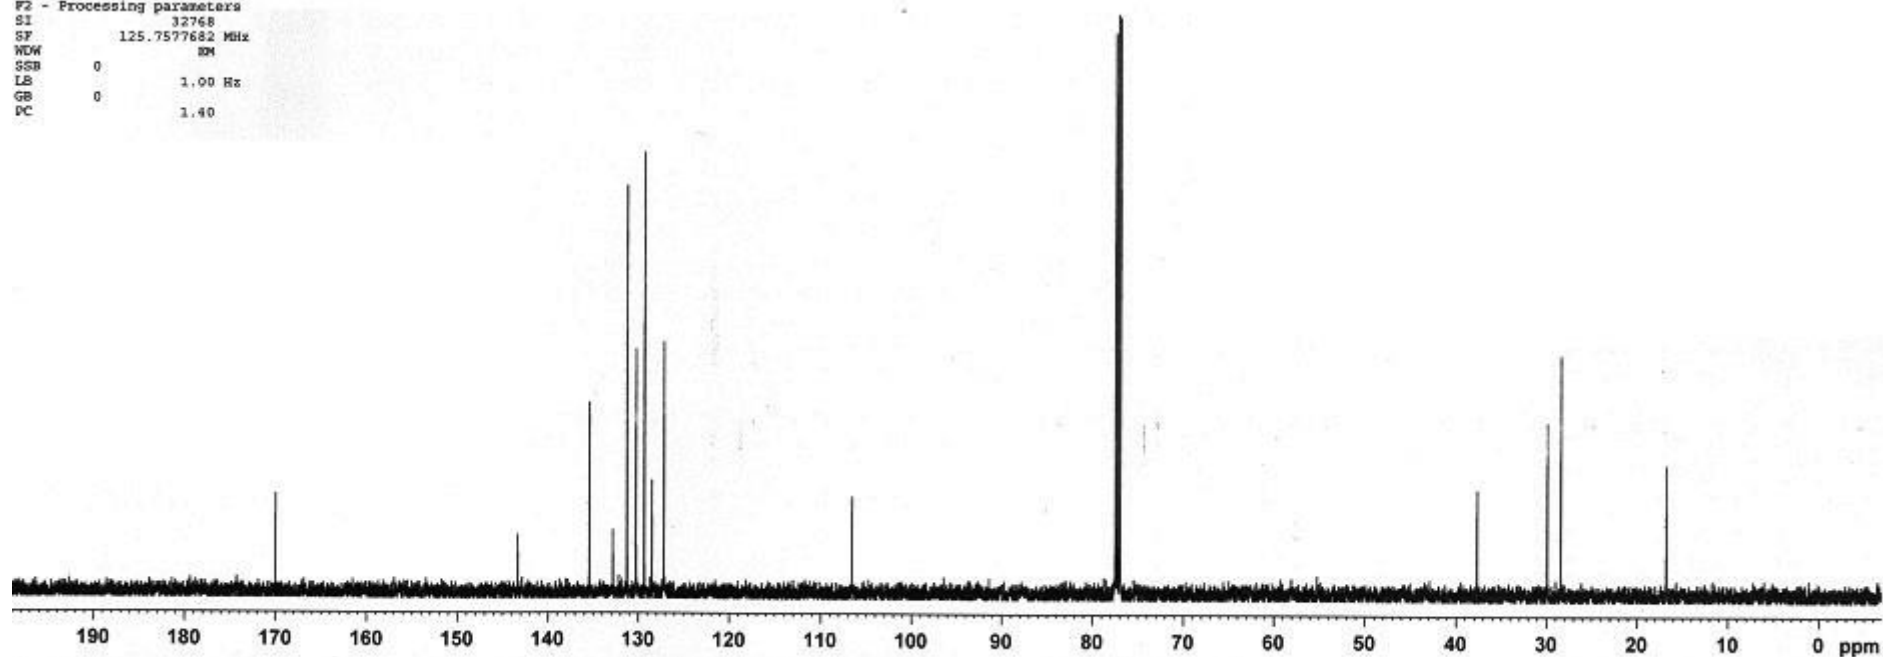

Fig S109. <sup>13</sup>C NMR Spectrum of 6d

# Chromatogram : ksb-4-ADH-1r-B-161\_channel2

System : Jasco HPLC  
Method : 30%-1f-212nm  
User : User1

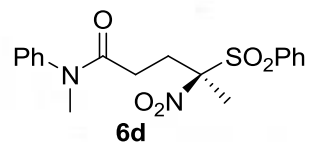

Acquired : 5/6/2014 10:40:43 PM  
Processed : 5/6/2014 10:59:41 PM  
Printed : 5/6/2014 11:03:15 PM

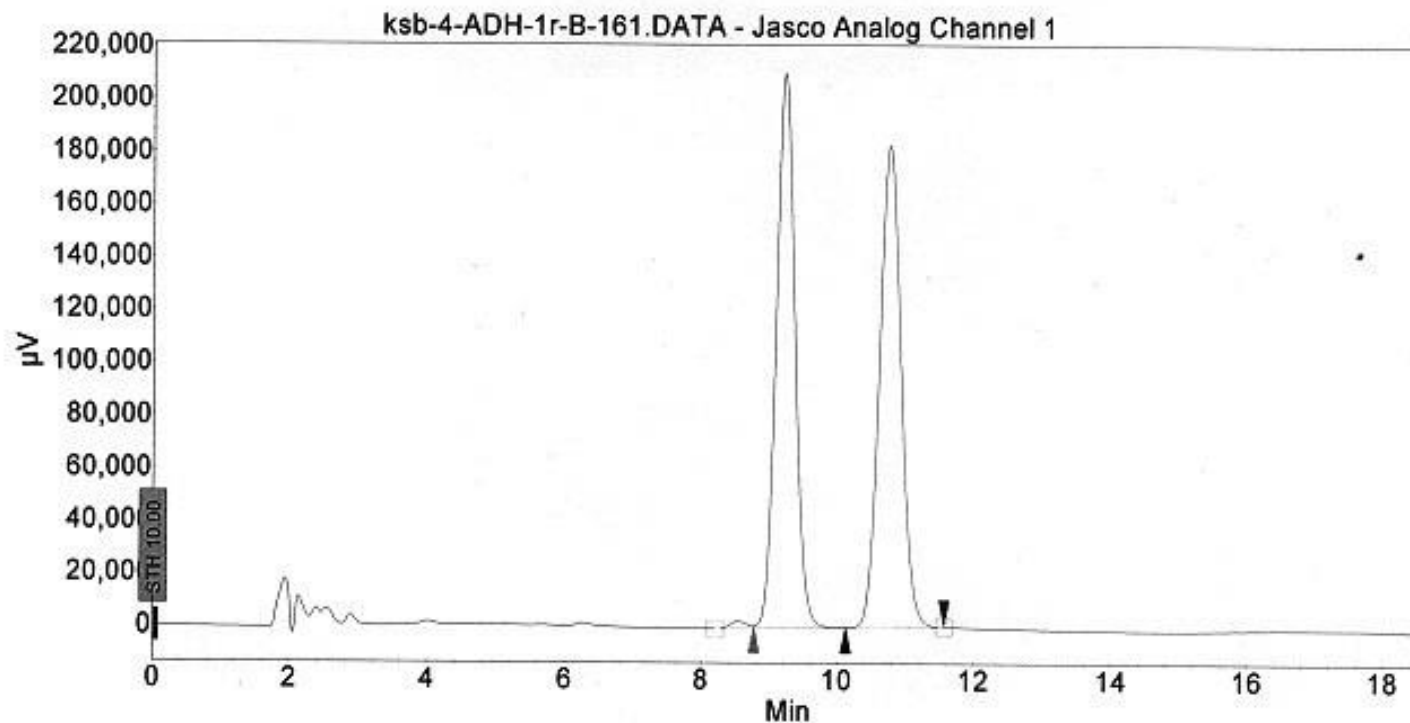

## Peak results :

| Index | Name    | Time [Min] | Quantity [% Area] | Height [μV] | Area [μV.Min] | Area % [%] |
|-------|---------|------------|-------------------|-------------|---------------|------------|
| 1     | UNKNOWN | 9.217      | 50.09             | 210822.0    | 67225.9       | 50.094     |
| 2     | UNKNOWN | 10.758     | 49.91             | 183064.5    | 66973.6       | 49.906     |
| Total |         |            | 100.00            | 393886.4    | 134199.5      | 100.000    |

Fig S110. HPLC Profile of Racemic 6d

# Chromatogram : ksb-4-ADH-1r-C-162\_channel4

System : Jasco HPLC  
Method : 30%-1f-212nm  
User : User1

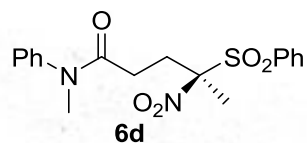

Acquired : 5/6/2014 11:01:22 PM  
Processed : 5/6/2014 11:35:57 PM  
Printed : 5/6/2014 11:36:41 PM

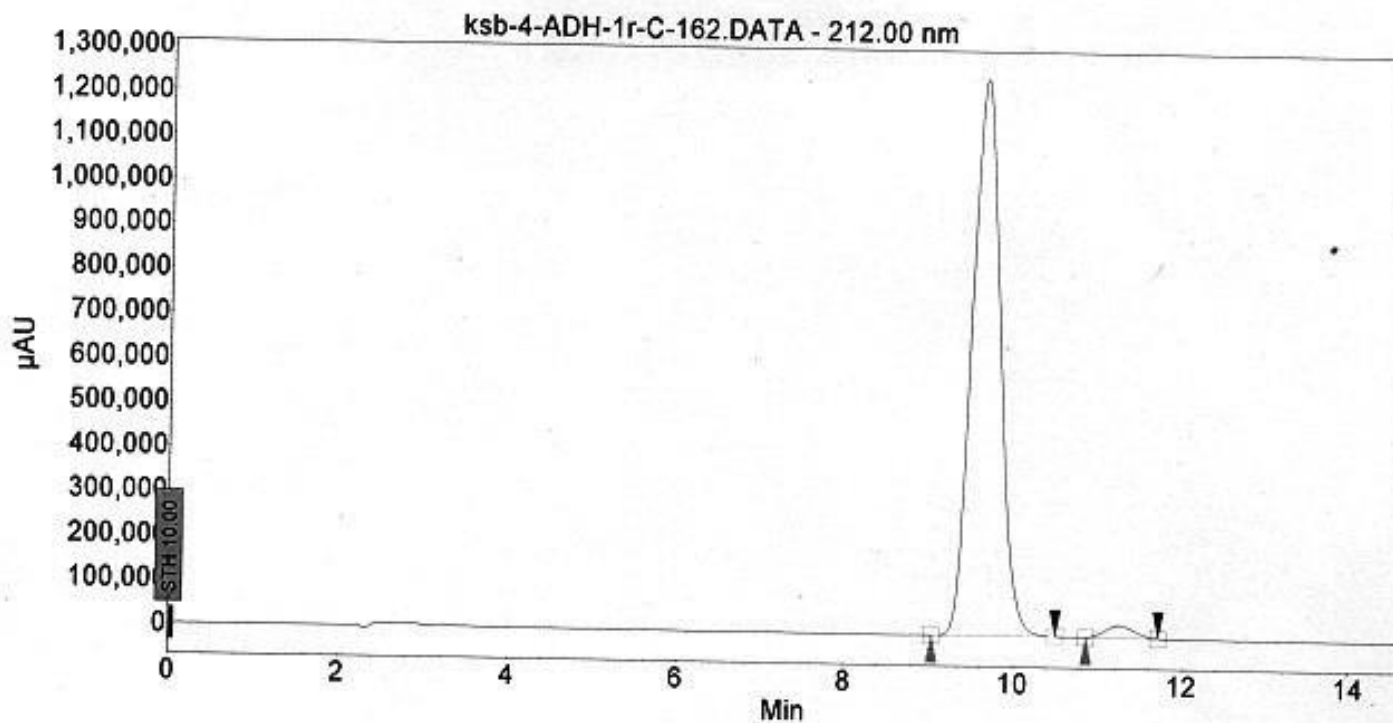

## Peak results :

| Index | Name    | Time [Min] | Quantity [% Area] | Height [μAU] | Area [μAU.Min] | Area % [%] |
|-------|---------|------------|-------------------|--------------|----------------|------------|
| 1     | UNKNOWN | 9.613      | 97.76             | 1248179.3    | 478862.4       | 97.755     |
| 2     | UNKNOWN | 11.253     | 2.24              | 27847.1      | 10996.1        | 2.245      |
| Total |         |            | 100.00            | 1276026.4    | 489858.5       | 100.000    |

Fig S111. HPLC Profile of Enantioenriched 6d

NAME INN-3-KSB-14A-1H  
 EXPNO 2  
 PROCNO 1  
 Date\_ 20111112  
 Time\_ 15.18  
 INSTRUM spect  
 PROBHD 5 mm PABBO BB-  
 PULPROG zg30  
 TD 65536  
 SOLVENT DMSO  
 NS 14  
 DS 0  
 SWH 8223.685 Hz  
 FIDRES 0.125483 Hz  
 AQ 3.9846387 sec  
 RG 32  
 DW 60.800 usec  
 DE 6.50 usec  
 TE 292.5 K  
 D1 1.00000000 sec  
 TD0 1

===== CHANNEL f1 =====  
 NUC1 1H  
 P1 13.50 usec  
 PL1 -1.00 dB  
 PL1W 10.56200695 W  
 SFO1 400.1324710 MHz  
 SI 32768  
 SF 400.1300026 MHz  
 WDW EM  
 SSB 0  
 LB 0.30 Hz  
 GB 0  
 PC 1.00

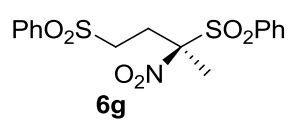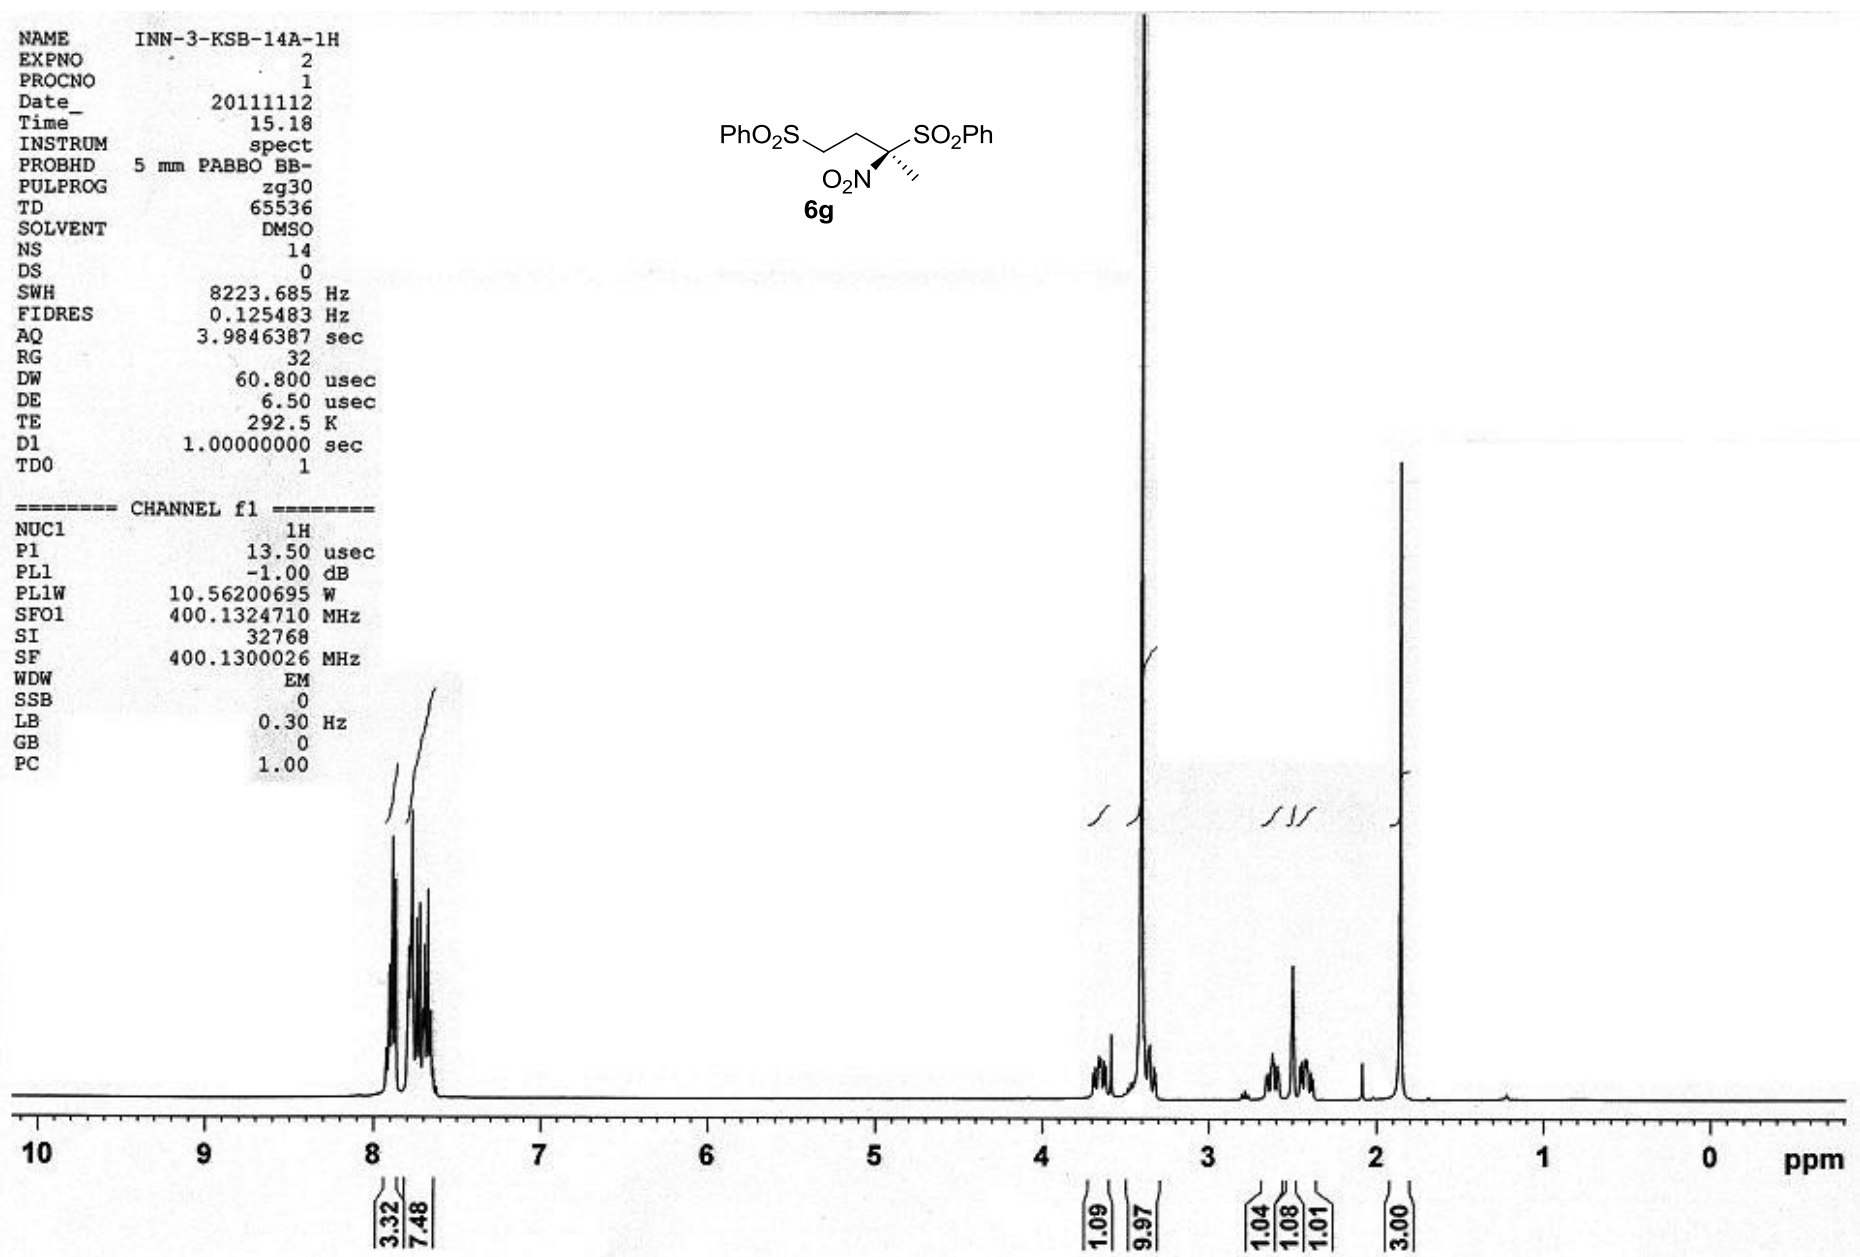

Fig S112. <sup>1</sup>H NMR Spectrum of 6g

NAME INN-3-KSB-14A-13C  
 EXPNO 2  
 PROCNO 1  
 Date 20111112  
 Time 15.24  
 INSTRUM spect  
 PROBHD 5 mm PABBO BB-  
 PULPROG zgpg30  
 TD 65536  
 SOLVENT DMSO  
 NS 116  
 DS 4  
 SWH 24038.461 Hz  
 FIDRES 0.366798 Hz  
 AQ 1.3631988 sec  
 RG 2050  
 DW 20.800 usec  
 DE 6.50 usec  
 TE 293.3 K  
 D1 2.00000000 sec  
 D11 0.03000000 sec  
 TD0 1

===== CHANNEL f1 =====  
 NUC1 13C  
 P1 8.75 usec  
 PL1 -2.00 dB  
 PL1W 56.53121948 W  
 SFO1 100.6228298 MHz

===== CHANNEL f2 =====  
 CPDPRG2 waltz16  
 NUC2 1H  
 PCPD2 80.00 usec  
 PL2 -1.00 dB  
 PL12 14.50 dB  
 PL13 14.50 dB  
 PL2W 10.56200695 W  
 PL12W 0.29767781 W  
 PL13W 0.29767781 W  
 SFO2 400.1316005 MHz  
 SI 32768  
 SF 100.6128108 MHz  
 WDW EM  
 SSB 0  
 LB 1.00 Hz  
 GB 0  
 PC 1.40

137.89  
 136.26  
 134.35  
 131.12  
 130.70  
 129.89  
 129.66  
 127.92

105.16

49.07  
 40.13  
 39.92  
 39.71  
 39.50  
 39.29  
 39.08  
 38.87  
 26.37

16.60

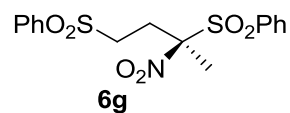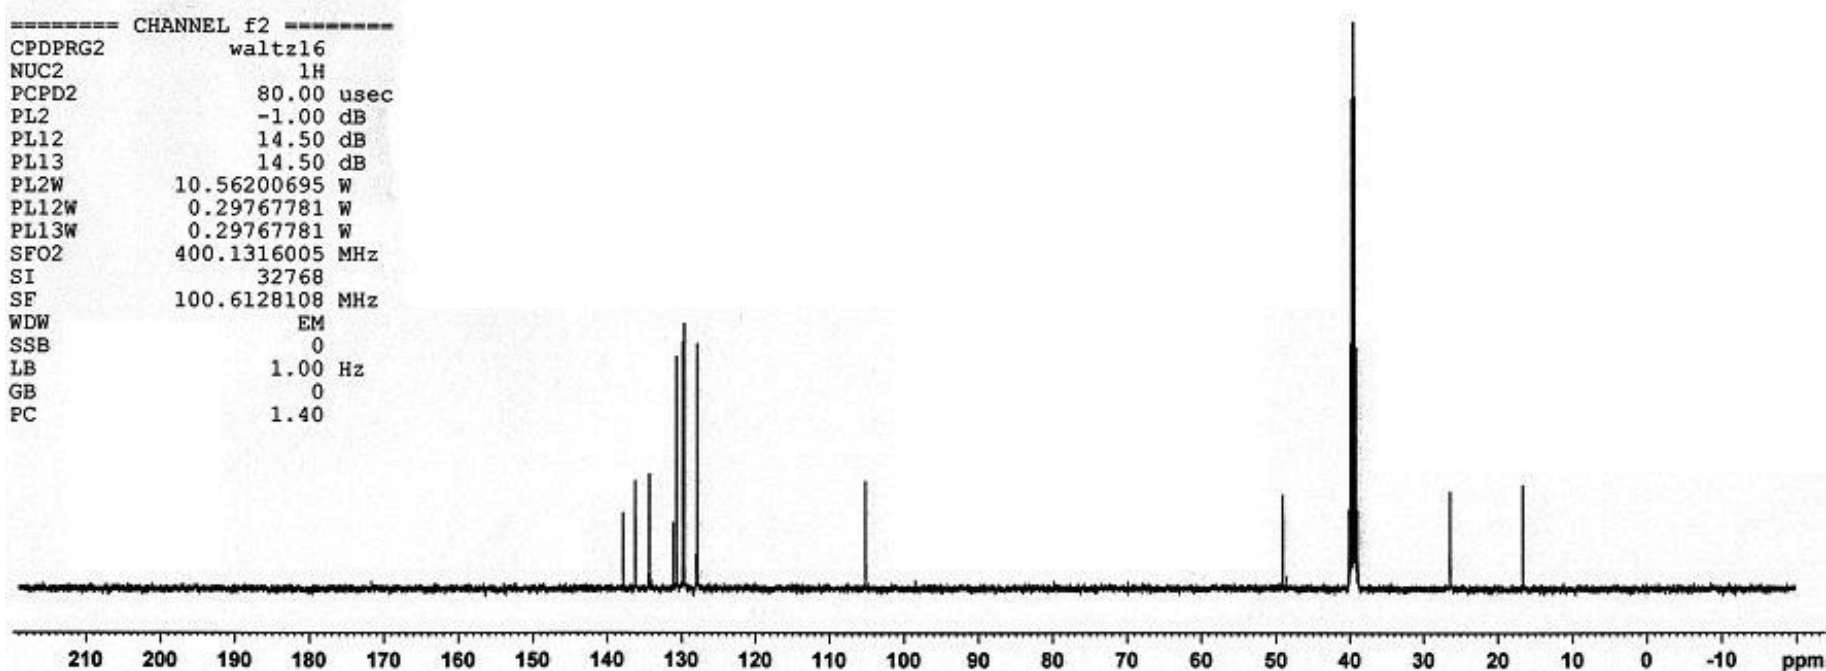

Fig S113. <sup>13</sup>C NMR Spectrum of 6g

# Chromatogram : ksb-4-IA-1r-C-rac-167\_channel4

System : JASCO HPLC  
 Method : ksb-30-1fr-216  
 User : User1

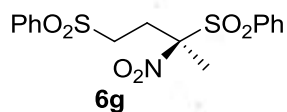

Acquired : 5/20/2014 11:20:45 AM  
 Processed : 5/20/2014 12:33:41 PM  
 Printed : 5/20/2014 1:21:41 PM

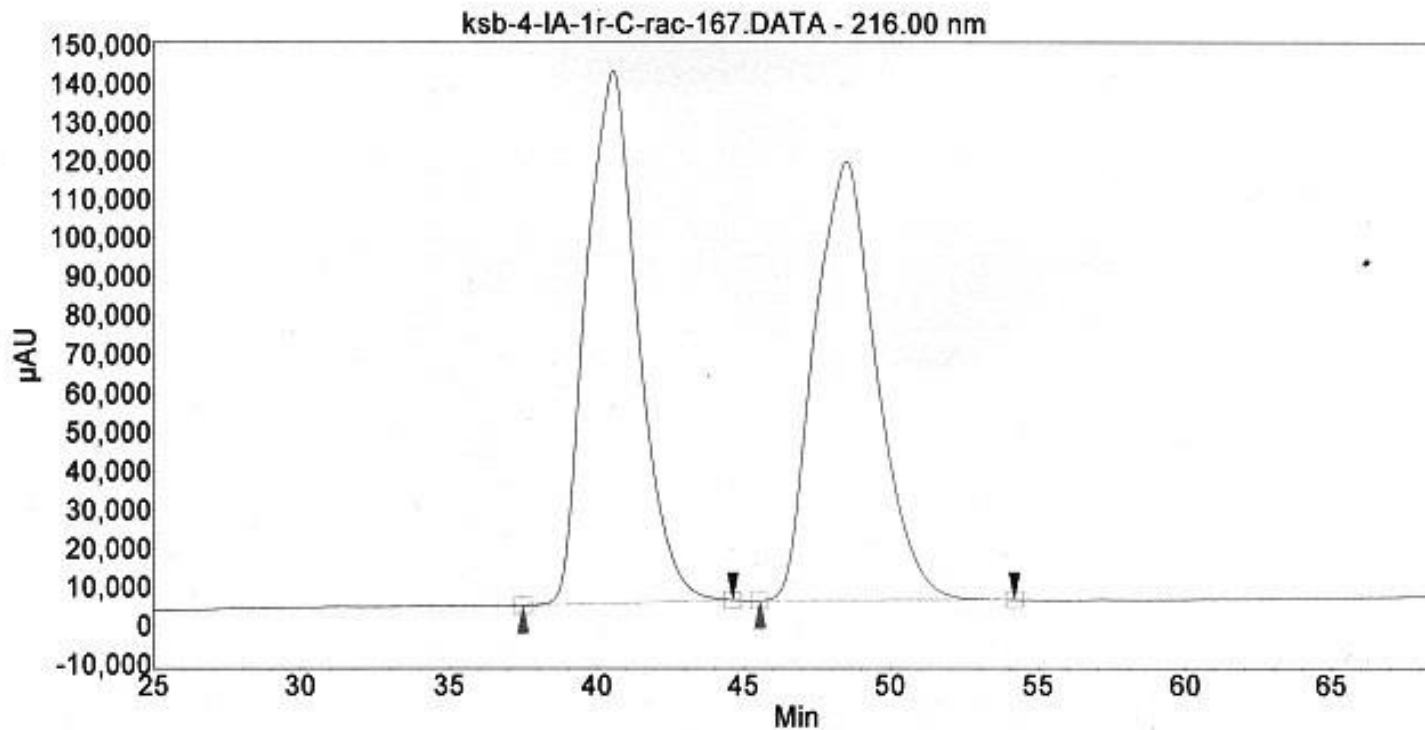

## Peak results :

| Index | Name    | Time [Min] | Quantity [% Area] | Height [μAU] | Area [μAU.Min] | Area % [%] |
|-------|---------|------------|-------------------|--------------|----------------|------------|
| 1     | UNKNOWN | 40.545     | 50.18             | 137678.3     | 280377.3       | 50.176     |
| 2     | UNKNOWN | 48.516     | 49.82             | 113419.0     | 278414.2       | 49.824     |
| Total |         |            | 100.00            | 251097.3     | 558791.5       | 100.000    |

Fig S114. HPLC Profile of Racemic 6g

# Chromatogram : ksb-4-IA-1r-C-en-167\_channel4

System : JASCO HPLC  
Method : ksb-30-1fr-216  
User : User1

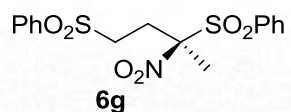

Acquired : 5/20/2014 12:32:19 PM  
Processed : 5/20/2014 1:43:36 PM  
Printed : 5/20/2014 1:43:43 PM

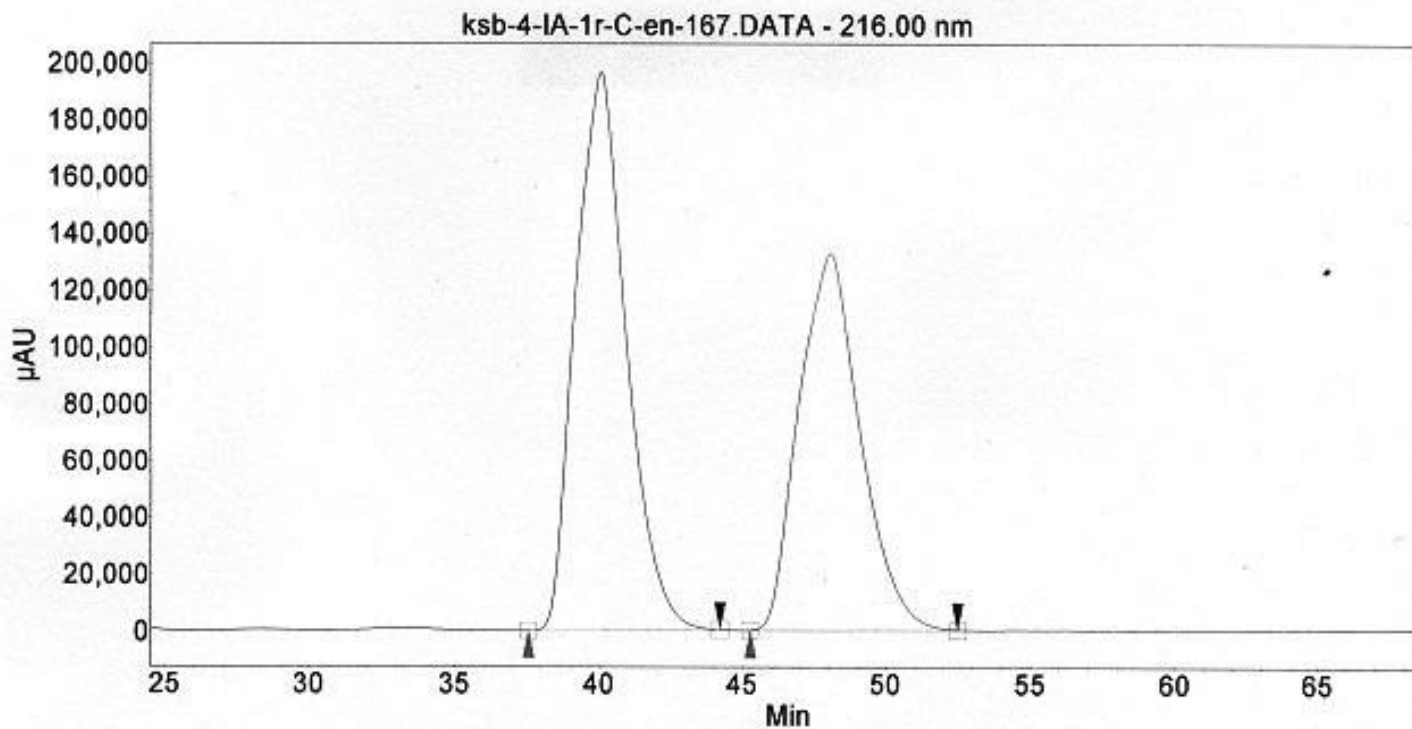

## Peak results :

| Index | Name    | Time [Min] | Quantity [% Area] | Height [ $\mu\text{AU}$ ] | Area [ $\mu\text{AU}\cdot\text{Min}$ ] | Area % [%] |
|-------|---------|------------|-------------------|---------------------------|----------------------------------------|------------|
| 1     | UNKNOWN | 40.052     | 55.05             | 196435.5                  | 401230.7                               | 55.051     |
| 2     | UNKNOWN | 48.063     | 44.95             | 132467.6                  | 327606.0                               | 44.949     |
| Total |         |            | 100.00            | 328903.1                  | 728836.7                               | 100.000    |

Fig S115. HPLC Profile of Enantioenriched 6g

Current Data Parameters  
NAME INN-4-KSB-168A-1H  
EXPNO 8  
PROCNO 1

F2 - Acquisition Parameters  
Date\_ 20140518  
Time 12.11  
INSTRUM spect  
PROBHD 5 mm PABBO BB/  
PULPROG zg30  
TD 65536  
SOLVENT CDCl3  
NS 16  
DS 2  
SWH 10000.000 Hz  
FIDRES 0.152588 Hz  
AQ 3.2767999 sec  
RG 30.72  
DW 50.000 usec  
DE 6.50 usec  
TE 294.9 K  
D1 1.00000000 sec  
TDO 1

----- CHANNEL f1 -----  
SFO1 500.1330885 MHz  
NUC1 1H  
P1 11.00 usec  
PLW1 13.00000000 W

F2 - Processing parameters  
SI 65536  
SF 500.1300117 MHz  
WDW EM  
SSB 0  
LB 0.30 Hz  
GB 0  
PC 1.00

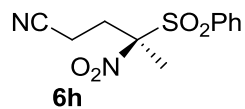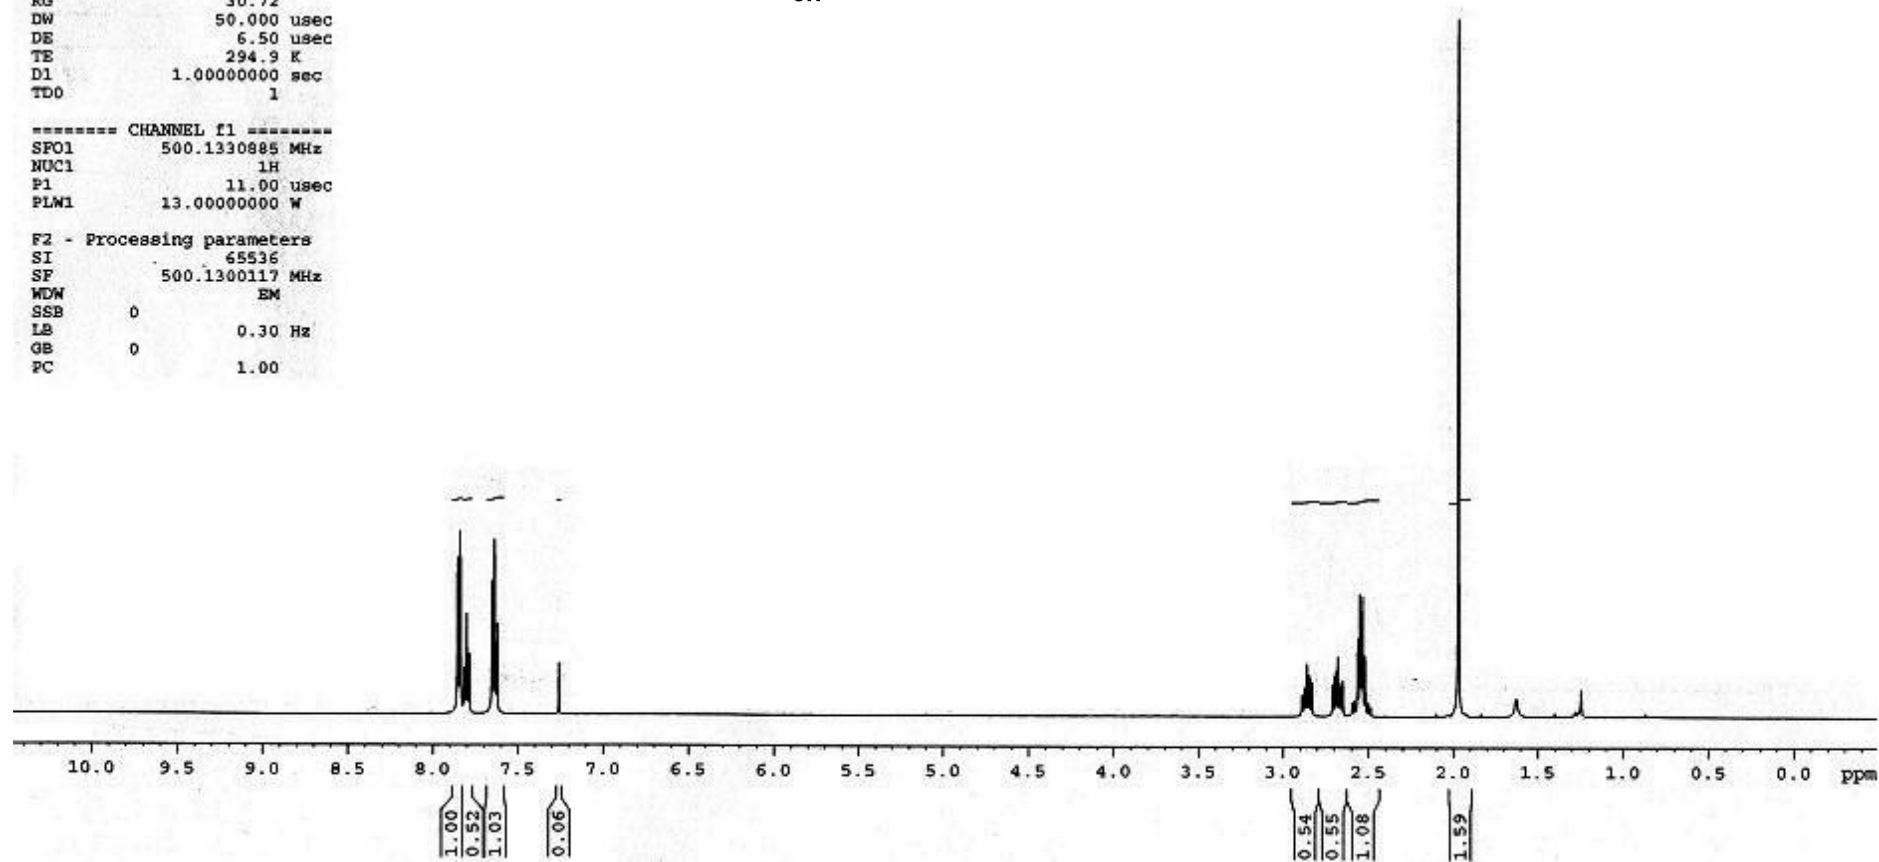

Fig S116. <sup>1</sup>H NMR Spectrum of 6h



Current Data Parameters  
NAME INN-4-KSB-168A-13C  
EXPNO 9  
PROCNO 1

F2 - Acquisition Parameters  
Date\_ 20140518  
Time\_ 12.13  
INSTRUM spect  
PROBHD 5 mm PABBO BB/  
PULPROG zgpg30  
TD 65536  
SOLVENT CDCl3  
NS 235  
DS 4  
SWH 29761.904 Hz  
FIDRES 0.454131 Hz  
AQ 1.1010048 sec  
RG 197.27  
DW 16.800 usec  
DE 6.50 usec  
TE 295.5 K  
D1 1.00000000 sec  
D11 0.03000000 sec  
TD0 1

----- CHANNEL f1 -----  
SFO1 125.7703637 MHz  
NUC1 13C  
P1 8.90 usec  
PLW1 103.00000000 W

----- CHANNEL f2 -----  
SFO2 500.1320005 MHz  
NUC2 1H  
CPDPRG[2] waltz16  
PCPD2 80.00 usec  
PLW2 13.00000000 W  
PLW12 0.34327999 W  
PLW13 0.21969999 W

F2 - Processing parameters  
SI 32768  
SF 125.7577728 MHz  
WDW EM  
SSB 0  
LB 1.00 Hz  
GB 0  
PC 1.40

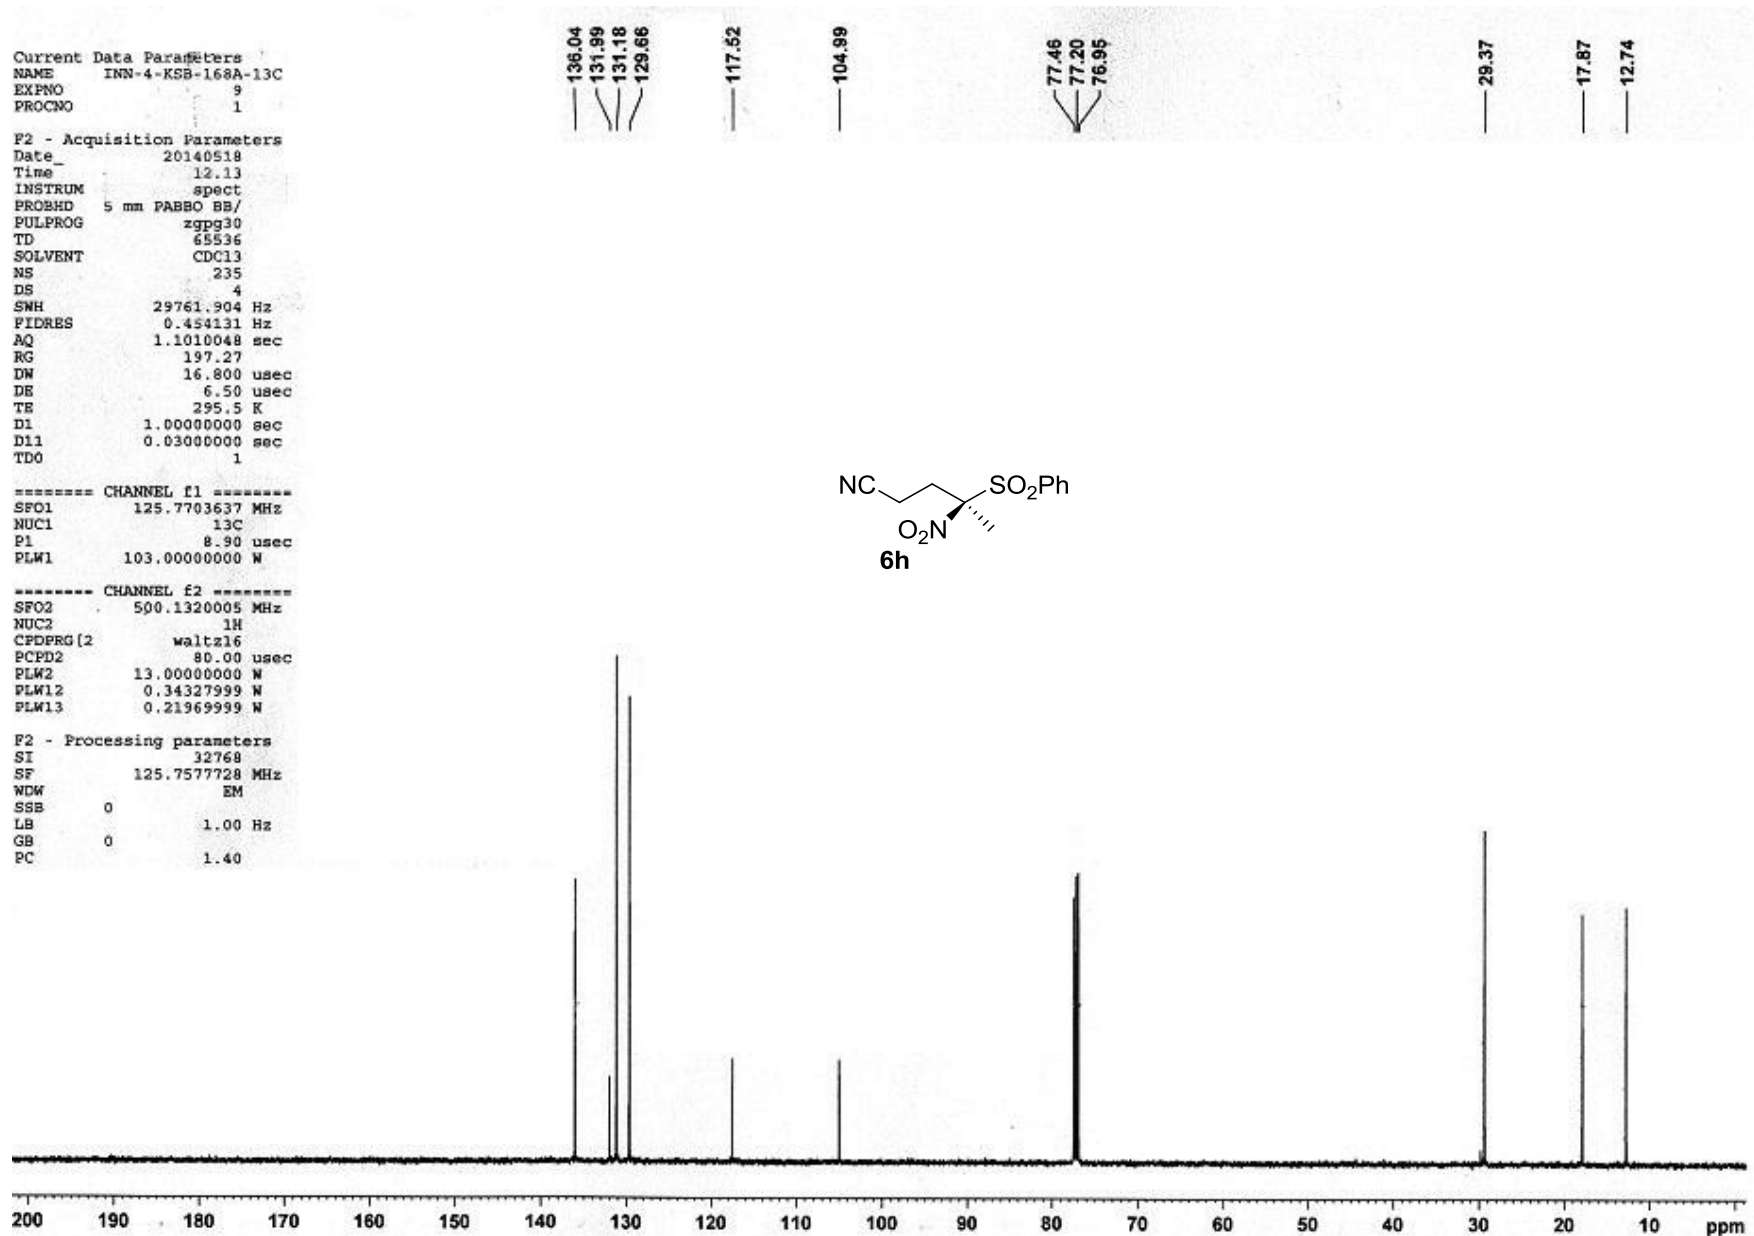

Fig S117. <sup>13</sup>C NMR Spectrum of 6h

# Chromatogram : ksb-4-ODH-1r-A-race-168\_channel4

System : JASCO HPLC  
Method : ksb-30-1r-216  
User : User1

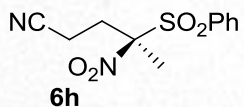

Acquired : 5/19/2014 10:46:38 AM  
Processed : 5/19/2014 11:18:01 AM  
Printed : 5/19/2014 11:19:46 AM

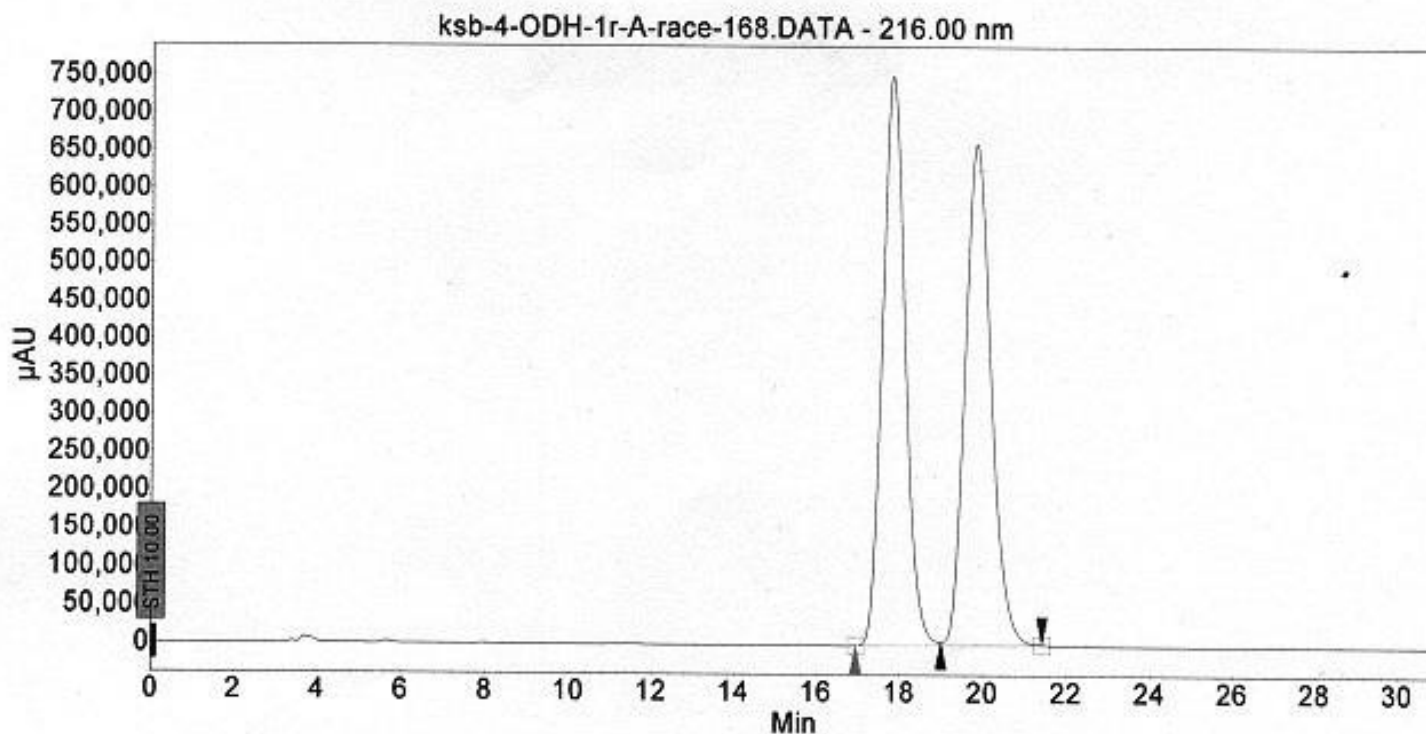

## Peak results :

| Index | Name    | Time [Min] | Quantity [% Area] | Height [μAU] | Area [μAU.Min] | Area % [%] |
|-------|---------|------------|-------------------|--------------|----------------|------------|
| 1     | UNKNOWN | 17.785     | 50.08             | 752657.8     | 473959.2       | 50.077     |
| 2     | UNKNOWN | 19.799     | 49.92             | 660839.6     | 472495.7       | 49.923     |
| Total |         |            | 100.00            | 1413497.5    | 946454.9       | 100.000    |

Fig S118. HPLC Profile of Racemic 6h

# Chromatogram : ksb-4-ODH-1r-A-en-168\_channel4

System : JASCO HPLC  
Method : ksb-30-1fr-216  
User : User1

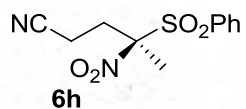

Acquired : 5/19/2014 11:52:03 AM  
Processed : 5/19/2014 12:28:52 PM  
Printed : 5/19/2014 12:29:44 PM

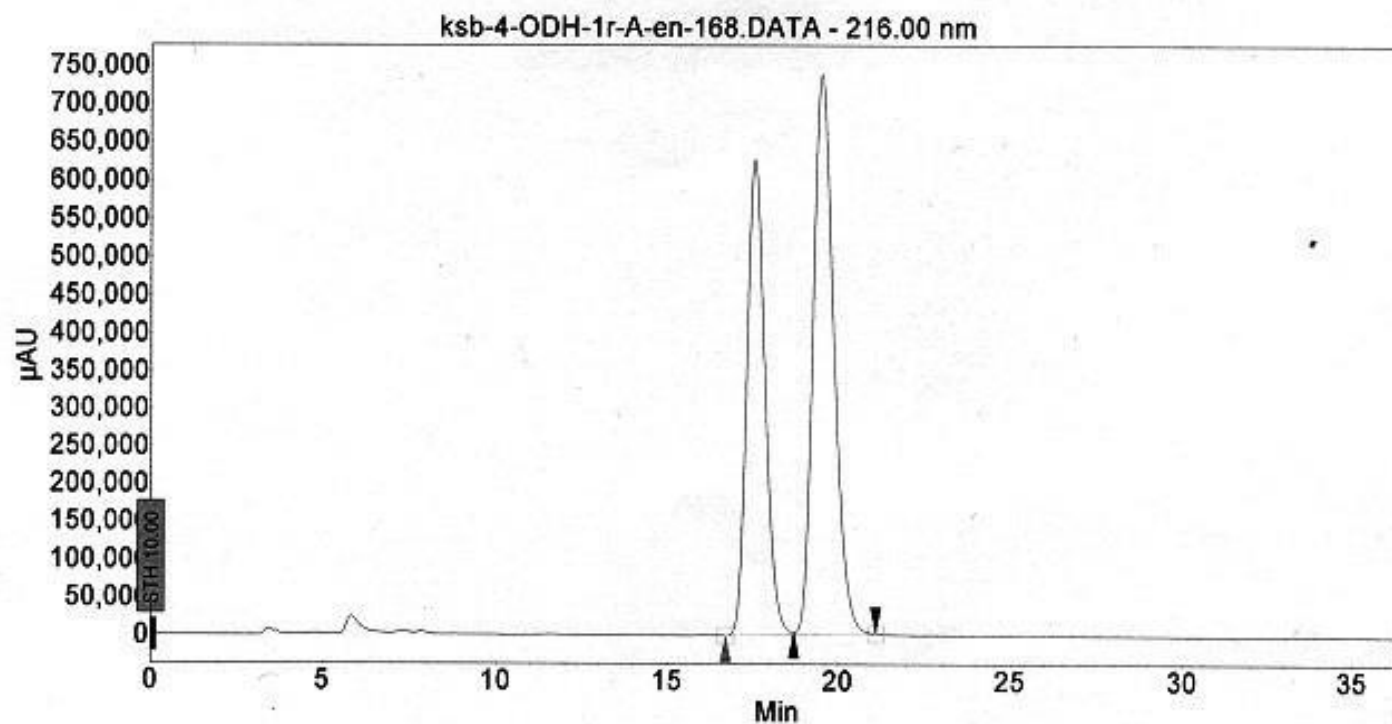

## Peak results :

| Index | Name    | Time [Min] | Quantity [% Area] | Height [μAU] | Area [μAU.Min] | Area % [%] |
|-------|---------|------------|-------------------|--------------|----------------|------------|
| 1     | UNKNOWN | 17.545     | 42.86             | 627529.8     | 388201.9       | 42.858     |
| 2     | UNKNOWN | 19.505     | 57.14             | 738239.0     | 517579.7       | 57.142     |
| Total |         |            | 100.00            | 1365768.8    | 905781.6       | 100.000    |

Fig S119. HPLC Profile of Enantioenriched 6h

NAME INN-4-KSB-112A-1H  
 EXPNO 13  
 PROCNO 1  
 Date\_ 20130905  
 Time\_ 23.34  
 INSTRUM spect  
 PROBHD 5 mm SEI 1H/D-  
 PULPROG zg30  
 TD 65536  
 SOLVENT CDCl3  
 NS 16  
 DS 0  
 SWH 6223.685 Hz  
 FIDRES 0.125483 Hz  
 AQ 3.9846387 sec  
 RG 32  
 DW 60.800 usec  
 DE 6.50 usec  
 TE 294.5 K  
 D1 1.00000000 sec  
 TD0 1

----- CHANNEL f1 -----  
 NUC1 1H  
 P1 6.75 usec  
 PL1 -3.00 dB  
 PL1W 16.73965454 W  
 SFO1 400.1324710 MHz  
 SI 32768  
 SF 400.1300095 MHz  
 MDW EM  
 SSB 0  
 LB 0.30 Hz  
 GB 0  
 PC 1.00

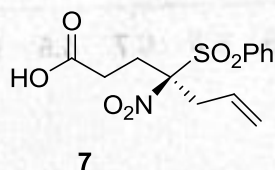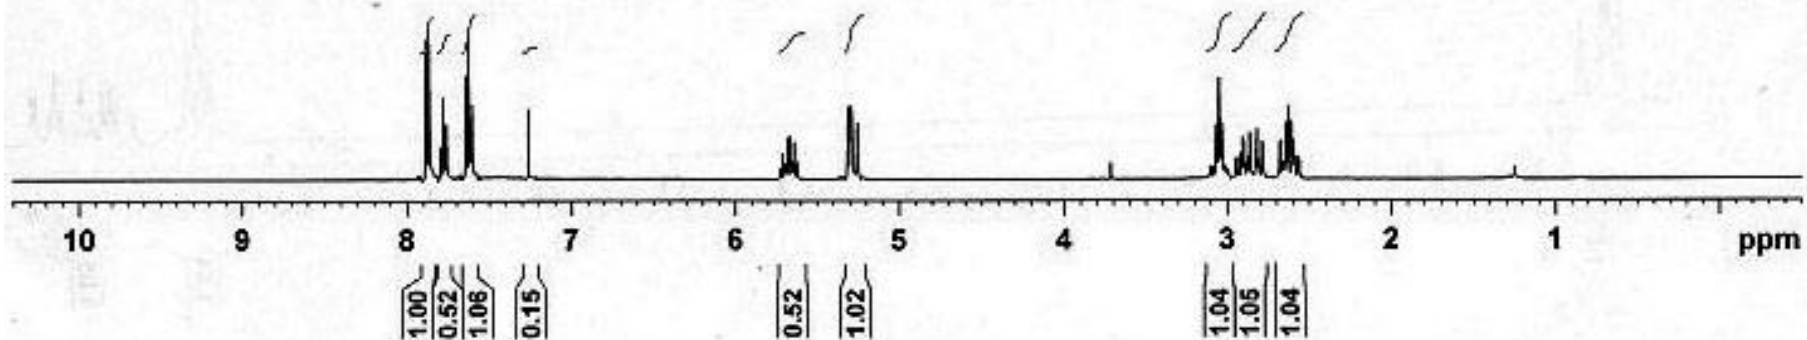

Fig S120. <sup>1</sup>H NMR Spectrum of 7

NAME INN-4-KSB-112A-13C  
 EXPNO 14  
 PROCNO 1  
 Date 20130905  
 Time 23.35  
 INSTRUM spect  
 PROBHD 5 mm SEI 1H/D-  
 PULPROG zgpg30  
 TD 65536  
 SOLVENT CDCl3  
 NS 178  
 DS 4  
 SWH 24038.461 Hz  
 FIDRES 0.366798 Hz  
 AQ 1.3631988 sec  
 RG 2050  
 DM 20.800 usec  
 DE 6.50 usec  
 TE 294.7 K  
 D1 1.00000000 sec  
 D11 0.03000000 sec  
 TD0 1

----- CHANNEL f1 -----  
 NUC1 13C  
 P1 13.00 usec  
 PL1 -3.00 dB  
 PL1W 71.16858673 W  
 SFO1 100.6228298 MHz

===== CHANNEL f2 =====  
 CPDPRG2 waltz16  
 NUC2 1H  
 PCPD2 80.00 usec  
 PL2 -3.00 dB  
 PL12 18.48 dB  
 PL13 19.00 dB  
 PL2W 16.73965454 W  
 PL12W 0.11905469 W  
 PL13W 0.10562007 W  
 SFO2 400.1316005 MHz  
 SI 32768  
 SF 100.6127690 MHz  
 MDW EM  
 SSB 0  
 LB 1.00 Hz  
 GB 0  
 PC 1.40

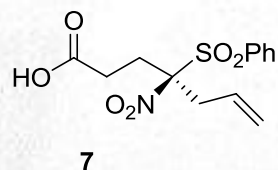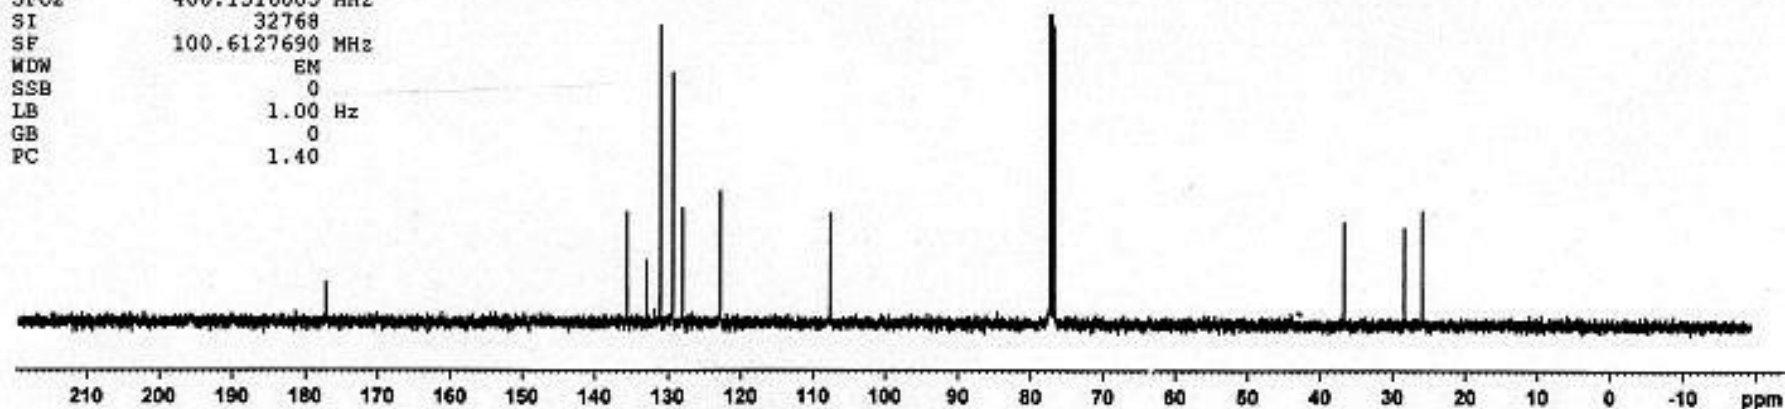

Fig S121. <sup>13</sup>C NMR Spectrum of 7

Current Data Parameters  
NAME inn-4-ksb-125a-1h  
EXPNO 4  
PROCNO 1

F2 - Acquisition Parameters  
Date\_ 20131020  
Time 22.58  
INSTRUM spect  
PROBHD 5 mm PABBO BB/  
PULPROG zg30  
TD 65536  
SOLVENT CDCl3  
NS 16  
DS 2  
SWH 10000.000 Hz  
FIDRES 0.152588 Hz  
AQ 3.2767999 sec  
RG 30.72  
DW 50.000 usec  
DE 6.50 usec  
TE 294.5 K  
D1 1.0000000 sec  
TD0 1

----- CHANNEL f1 -----  
SF01 500.1330885 MHz  
NUC1 1H  
P1 13.00 usec  
PLW1 13.00000000 W

F2 - Processing parameters  
SI 65536  
SF 500.1330000 MHz  
WDW EM  
SSB 0  
LB 0.30 Hz  
GB 0  
PC 1.00

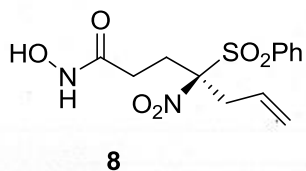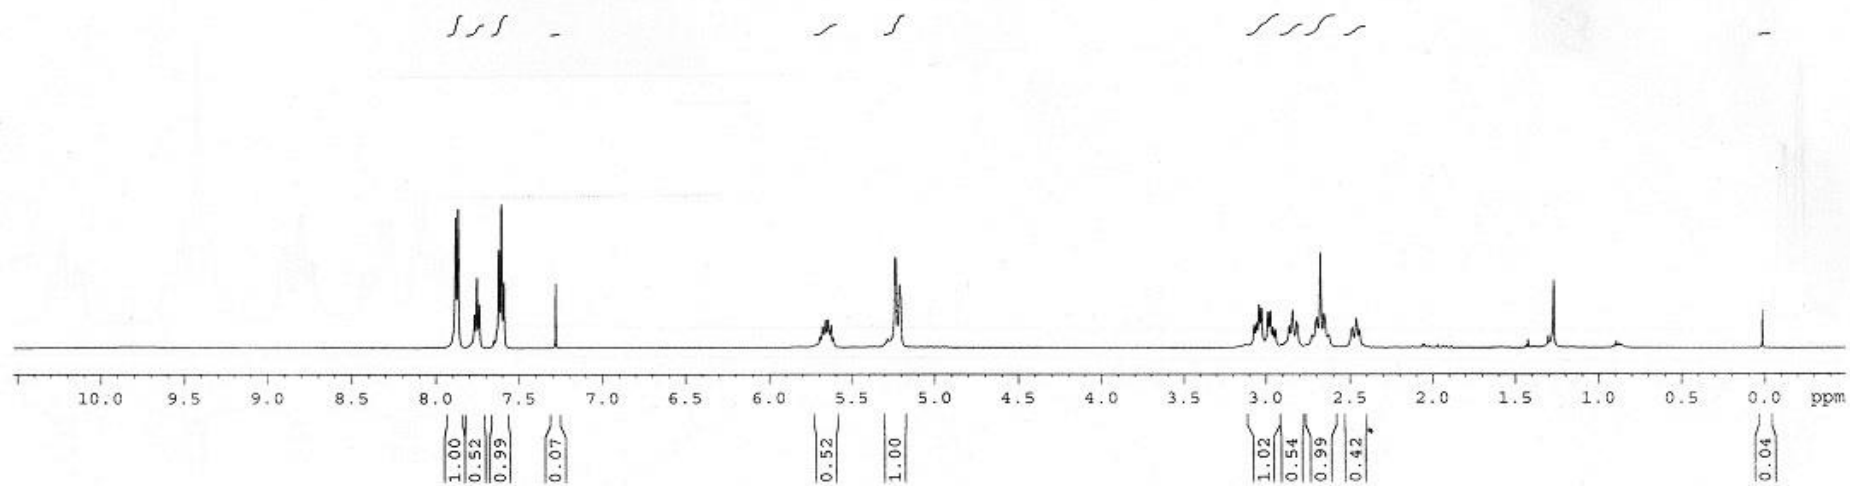

Fig S122. <sup>1</sup>H NMR Spectrum of 8

inn-4-ksb-125a-13c

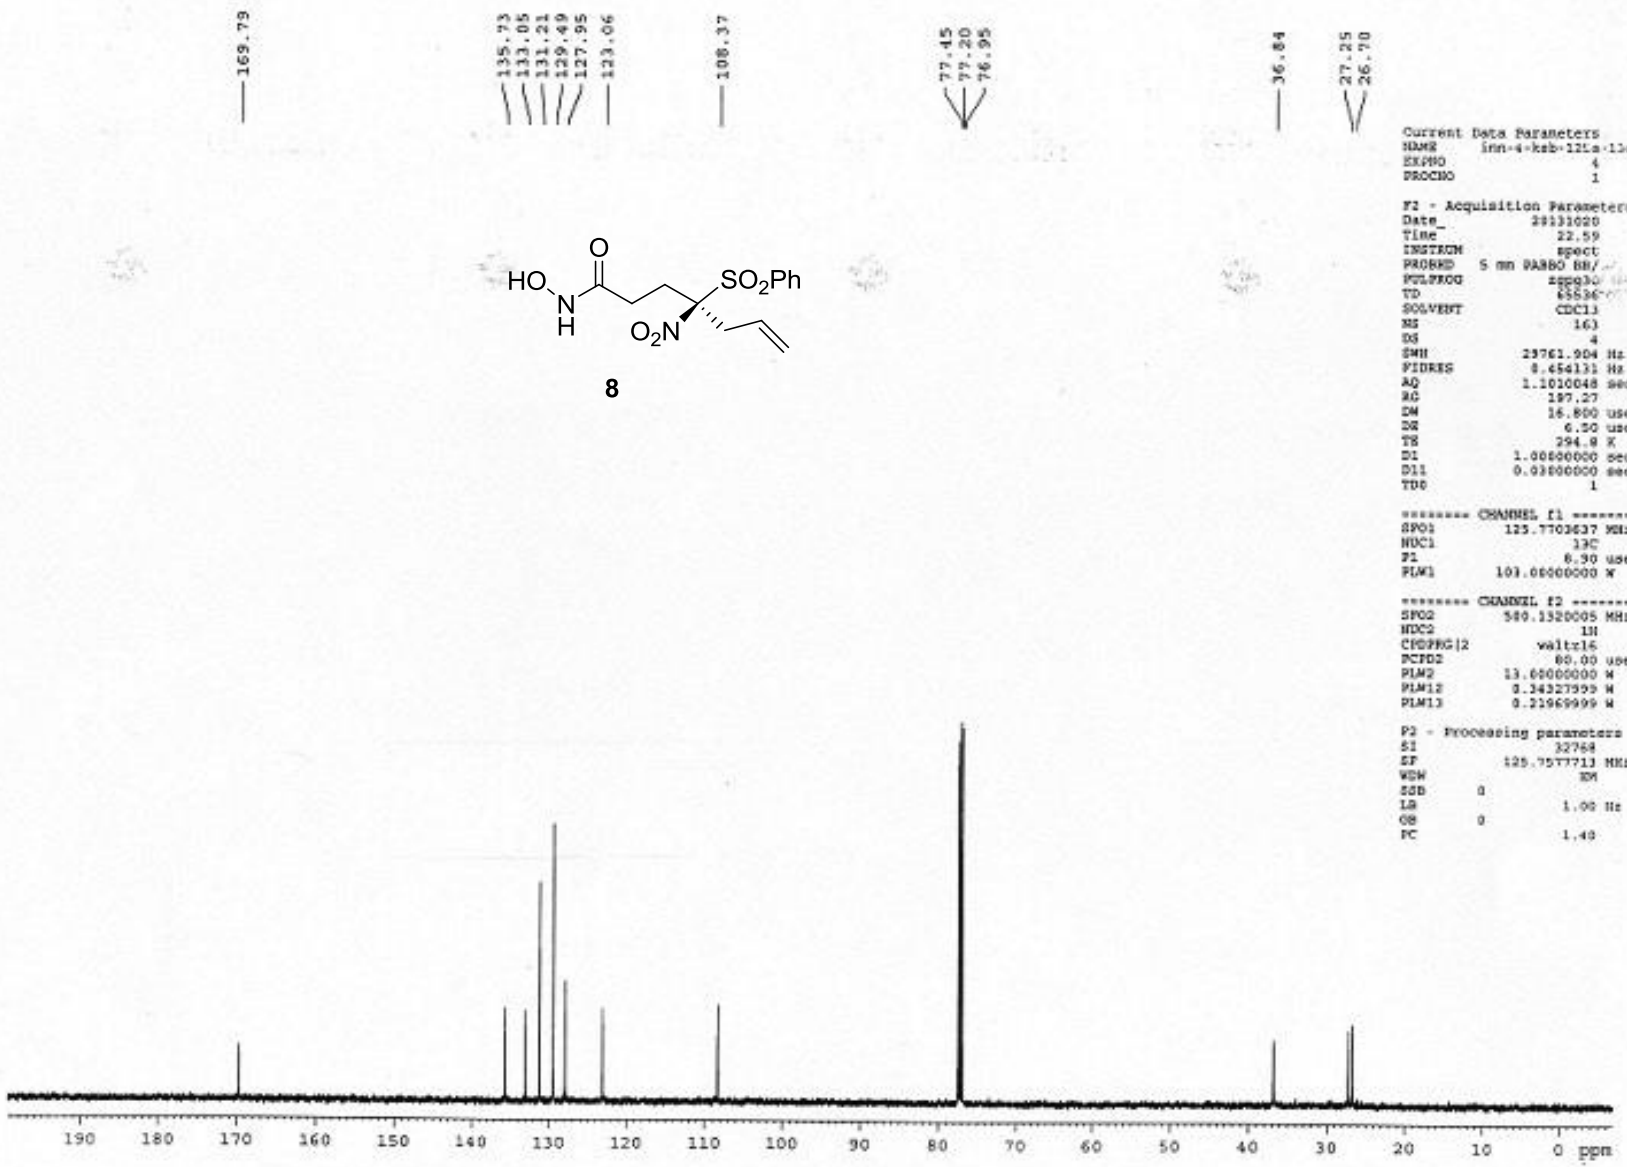

Fig S123. <sup>13</sup>C NMR Spectrum of 8

# Chromatogram : ksb-4-IC-1r-A-125\_channel6

System : JASCO HPLC  
 Method : ksb-30-1fr-216  
 User : User1

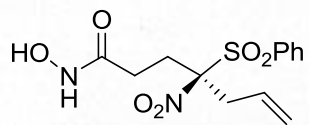

8

Acquired : 11/11/2013 5:35:39 PM  
 Processed : 11/11/2013 6:43:31 PM  
 Printed : 11/11/2013 8:20:47 PM

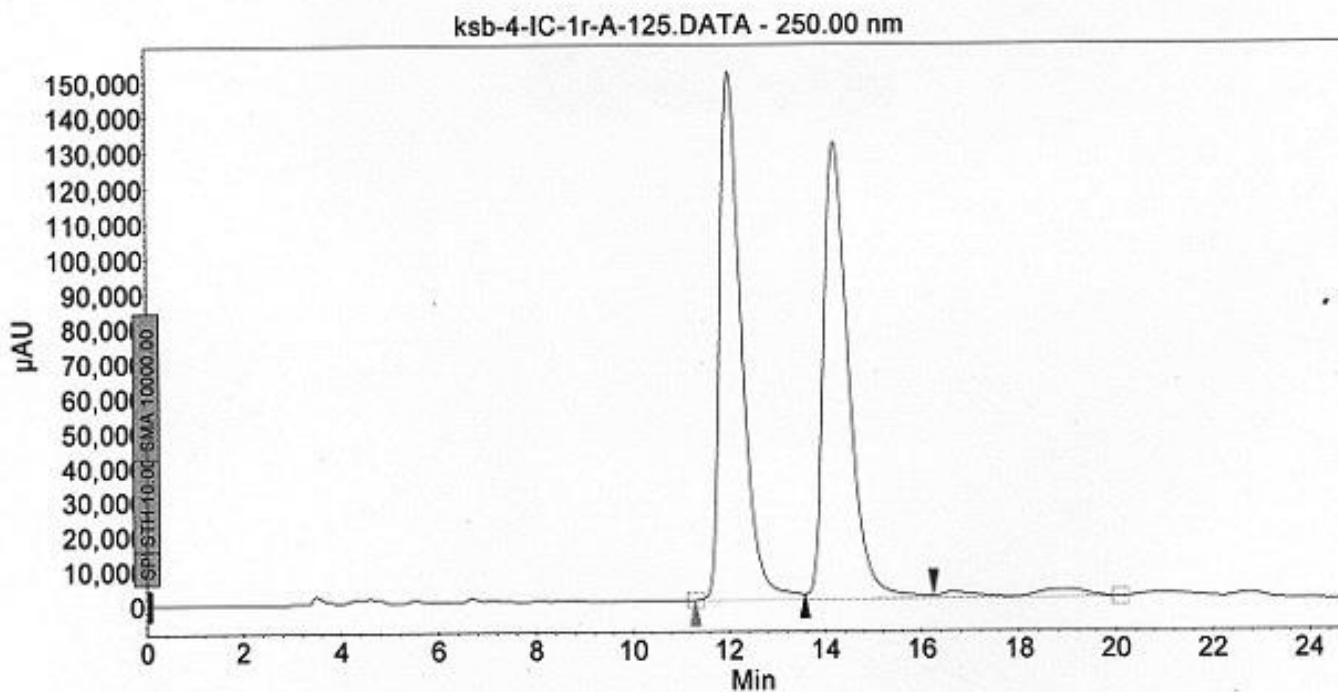

## Peak results :

| Index | Name    | Time [Min] | Quantity [% Area] | Height [μAU] | Area [μAU.Min] | Area % [%] |
|-------|---------|------------|-------------------|--------------|----------------|------------|
| 1     | UNKNOWN | 12.022     | 49.86             | 151181.9     | 77938.9        | 49.856     |
| 2     | UNKNOWN | 14.208     | 50.14             | 131029.5     | 78388.6        | 50.144     |
| Total |         |            | 100.00            | 282211.4     | 156327.5       | 100.000    |

Fig S124. HPLC Profile of Racemic 8



# Chromatogram : ksb-4-IC-1r-B-125\_channel5

System : JASCO HPLC  
 Method : ksb-30-1r-216  
 User : User1

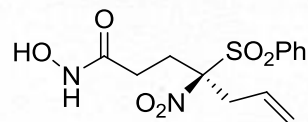

8

Acquired : 11/11/2013 7:13:31 PM  
 Processed : 11/11/2013 7:30:51 PM  
 Printed : 11/11/2013 8:21:27 PM

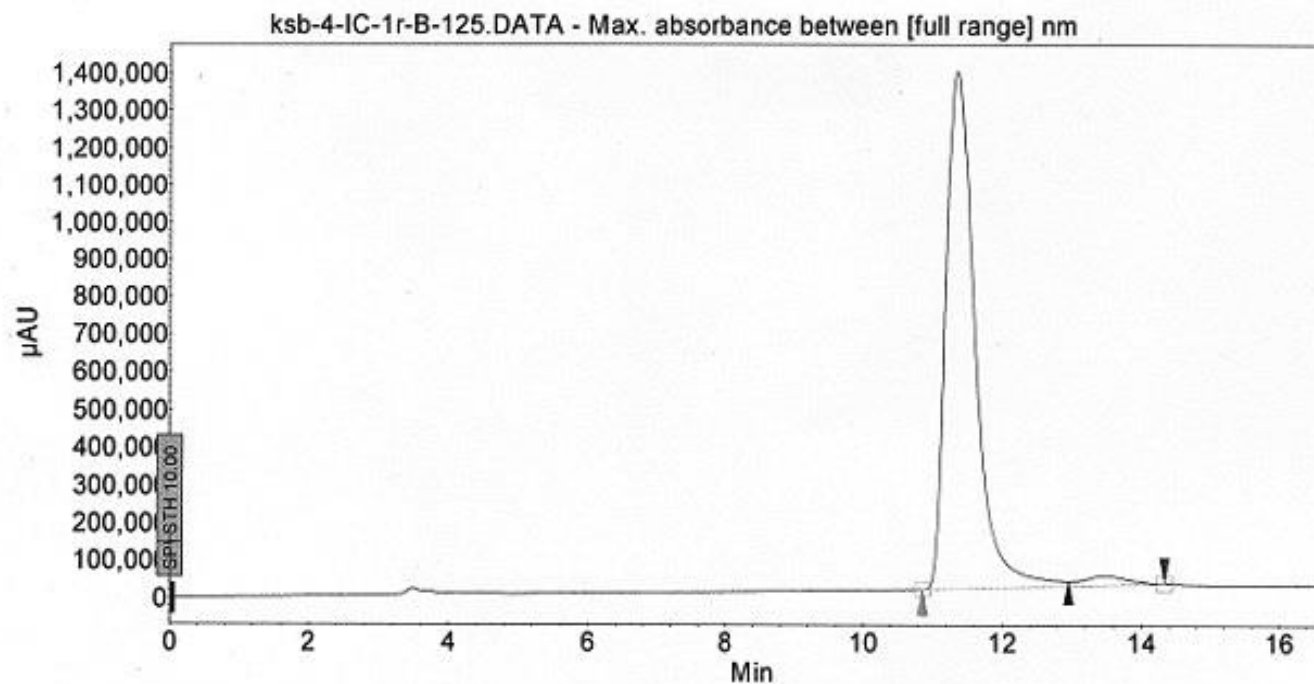

## Peak results :

| Index | Name    | Time [Min] | Quantity [% Area] | Height [μAU] | Area [μAU.Min] | Area % [%] |
|-------|---------|------------|-------------------|--------------|----------------|------------|
| 1     | UNKNOWN | 11.346     | 97.21             | 1380239.6    | 670184.9       | 97.211     |
| 2     | UNKNOWN | 13.466     | 2.79              | 25816.6      | 19224.5        | 2.789      |
| Total |         |            | 100.00            | 1406056.3    | 689409.4       | 100.000    |

Fig S125. HPLC Profile of Enantioenriched 8
